# Supplementary material for: The neuronal calcium sensor NCS-1 regulates the phosphorylation state and activity of the Gα chaperone and GEF Ric-8A
Source: eLife journal article supplement (doi:10.7554/elife.86151), 2023-11-27
Supplement: supp [file elife-86151-supp-v1.zip]

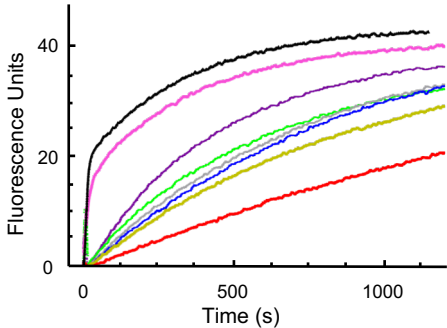

- ▲  $\text{rRic-8A-491}$  (0  $\mu\text{M}$   $\text{CaCl}_2$ )
- $\text{rRic-8A-491}$  (500  $\mu\text{M}$   $\text{CaCl}_2$ )
- $\text{r}\Delta\text{N31G}\alpha_{i1}$  (0  $\mu\text{M}$   $\text{CaCl}_2$ )
- $\text{r}\Delta\text{N31G}\alpha_{i1}$  (500  $\mu\text{M}$   $\text{CaCl}_2$ )
- His-NCS-1/ $\text{rRic-8A-491}$  (0  $\mu\text{M}$   $\text{CaCl}_2$ )
- His-NCS-1/ $\text{rRic-8A-491}$  (1  $\mu\text{M}$   $\text{CaCl}_2$ )
- His-NCS-1/ $\text{rRic-8A-491}$  (50  $\mu\text{M}$   $\text{CaCl}_2$ )
- His-NCS-1/ $\text{rRic-8A-491}$  (500  $\mu\text{M}$   $\text{CaCl}_2$ )
