# Supplementary material for: The neuronal calcium sensor NCS-1 regulates the phosphorylation state and activity of the Gα chaperone and GEF Ric-8A
Source: eLife journal article supplement (doi:10.7554/elife.86151), 2023-11-27
Supplement: supp [file elife-86151-supp-v1.zip]

A

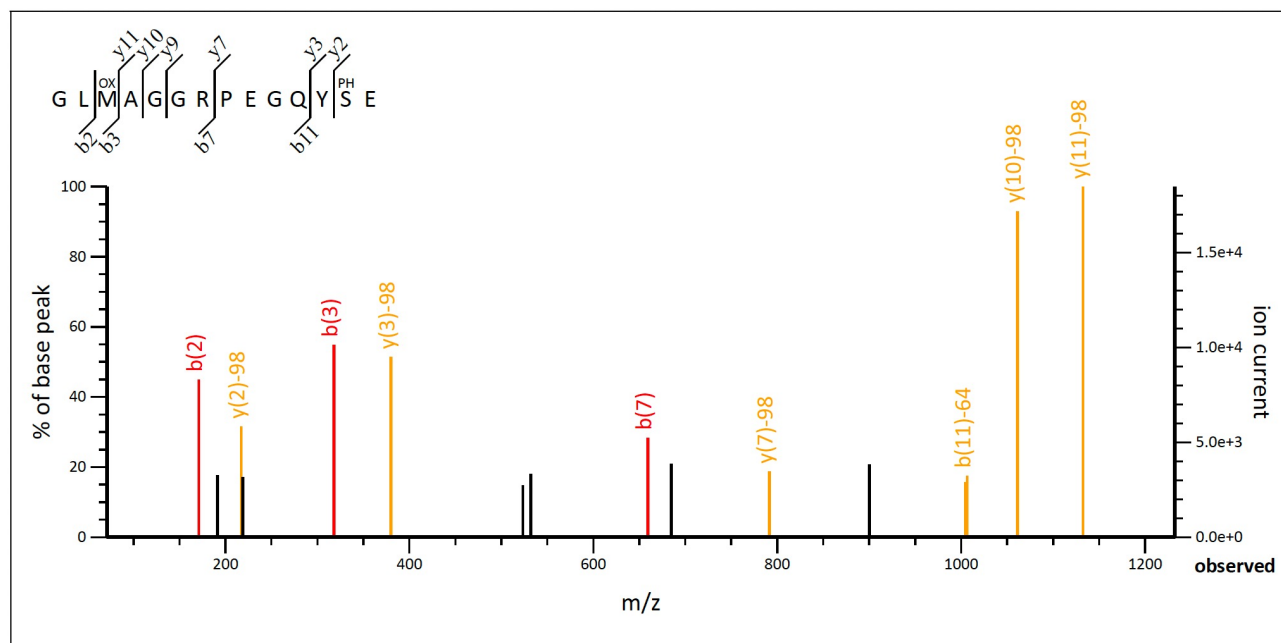

| Score | Mr(calc) | Delta | Sequence                       | Site Analysis      |
|-------|----------|-------|--------------------------------|--------------------|
| 43.0  | 1546.612 | 0.003 | <a href="#">GLMAGGRPEGQYSE</a> | Phospho S13 99.99% |
| 3.4   | 1546.612 | 0.003 | <a href="#">GLMAGGRPEGQYSE</a> | Phospho Y12 0.01%  |
| 2.7   | 1545.606 | 1.010 | <a href="#">TDNVEMVTLGWGSG</a> |                    |

B

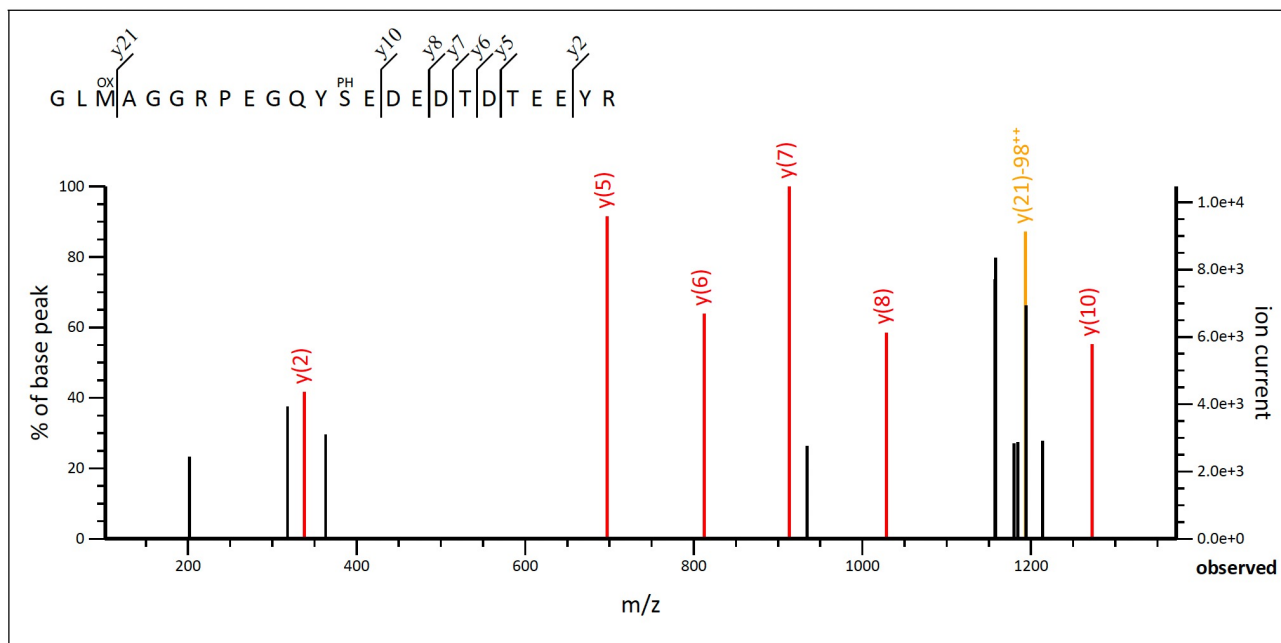

| Score | Mr(calc) | Delta | Sequence                                 | Site Analysis      |
|-------|----------|-------|------------------------------------------|--------------------|
| 44.7  | 2800.081 | 0.003 | <a href="#">GLMAGGRPEGQYSEDEDTDTEEYR</a> | Phospho S13 77.22% |
| 39.4  | 2800.081 | 0.003 | <a href="#">GLMAGGRPEGQYSEDEDTDTEEYR</a> | Phospho Y12 22.74% |
| 11.0  | 2800.081 | 0.003 | <a href="#">GLMAGGRPEGQYSEDEDTDTEEYR</a> | Phospho T18 0.03%  |
