# Supplementary material for: The neuronal calcium sensor NCS-1 regulates the phosphorylation state and activity of the Gα chaperone and GEF Ric-8A
Source: eLife journal article supplement (doi:10.7554/elife.86151), 2023-11-27
Supplement: supp [file elife-86151-supp-v1.zip]

A

hRic-8A-WT  
hRic-8A-P-Mut

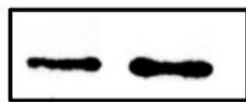

IP: anti-NCS-1  
WB: anti V5

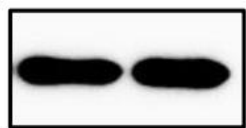

INPUT  
hRic-8A-V5

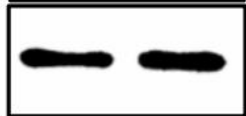

hNCS-1

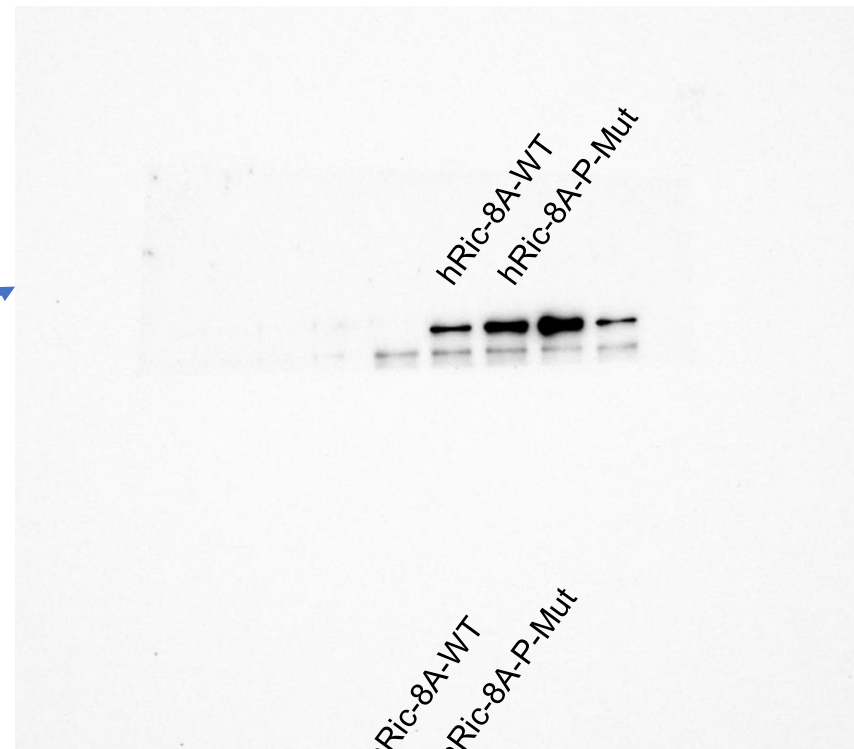

hRic-8A-WT  
hRic-8A-P-Mut

hRic-8A-WT  
hRic-8A-P-Mut

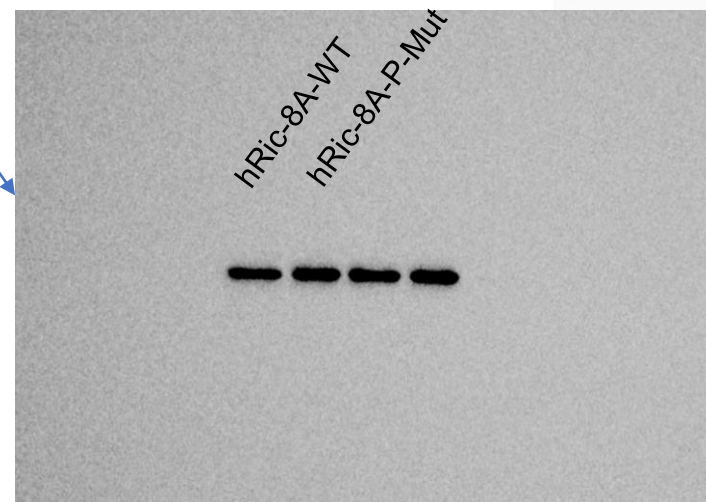

hRic-8A-WT  
hRic-8A-P-Mut
