# Supplementary material for: The neuronal calcium sensor NCS-1 regulates the phosphorylation state and activity of the Gα chaperone and GEF Ric-8A
Source: eLife journal article supplement (doi:10.7554/elife.86151), 2023-11-27
Supplement: supp [file elife-86151-supp-v1.zip]

GEL1

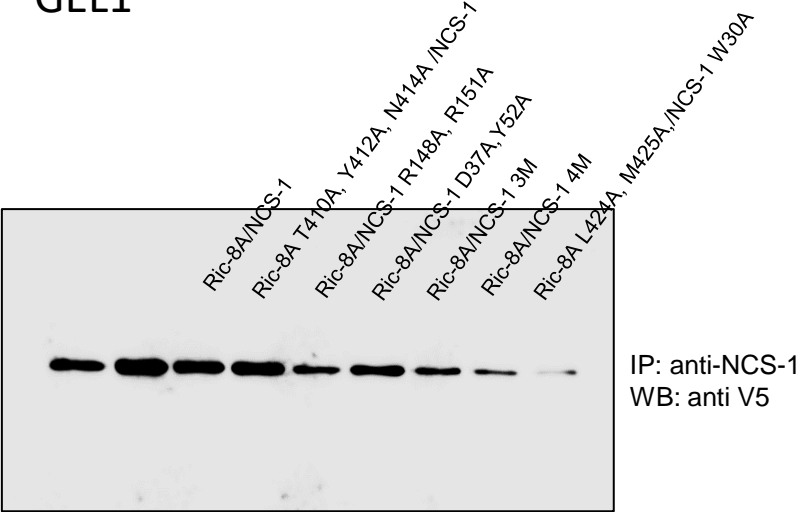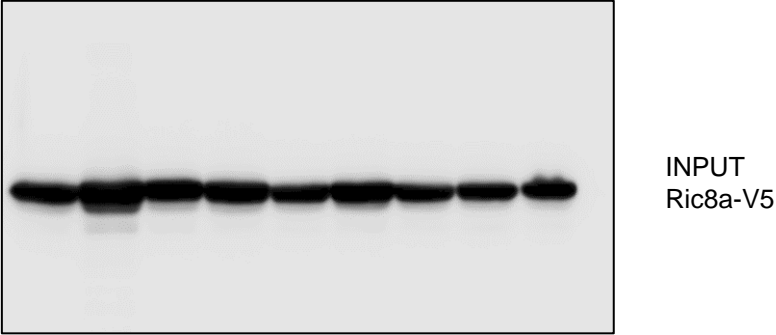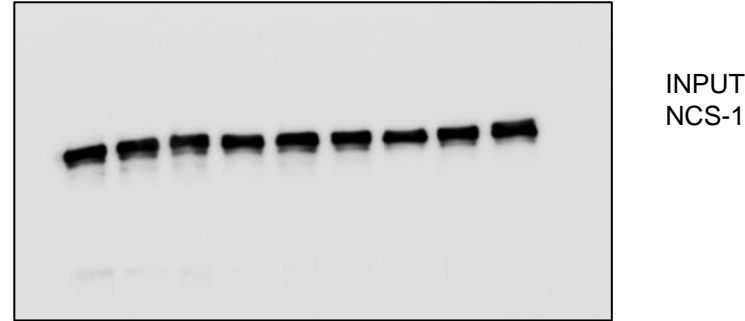

GEL2

Ric-8A/NCS-1  
Ric-8A T410A, Y412A, N414A /NCS-1  
Ric-8A/NCS-1 R148A, R151A  
Ric-8A/NCS-1 D37A, Y52A  
Ric-8A/NCS-1 3M  
Ric-8A/NCS-1 4M  
Ric-8A L424A, M425A/NCS-1 W30A

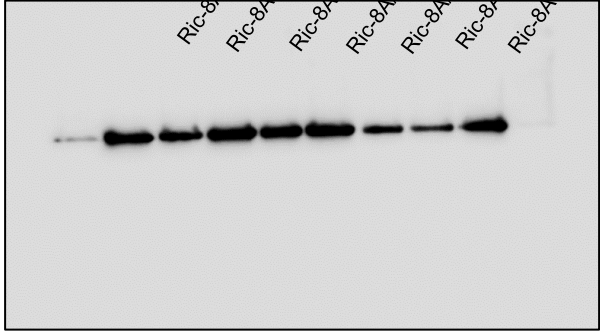

IP: anti-NCS-1  
WB: anti V5

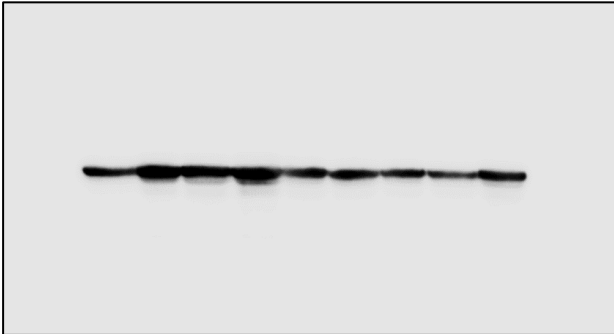

INPUT  
Ric8a-V5

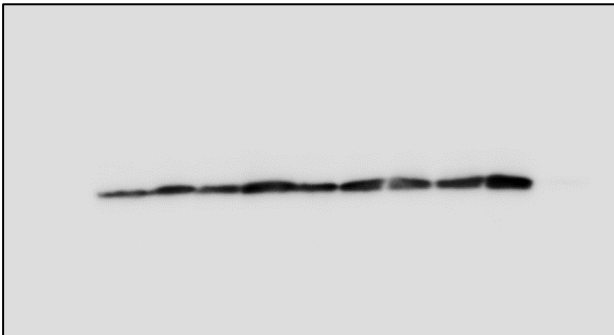

INPUT  
NCS-1

GEL3

Ric-8A/NCS-1  
Ric-8A T410A, Y412A, N414A /NCS-1  
Ric-8A/NCS-1 R148A, R151A  
Ric-8A/NCS-1 D37A, Y52A  
Ric-8A/NCS-1 3M  
Ric-8A/NCS-1 4M  
Ric-8A L424A, M425A/NCS-1 W30A

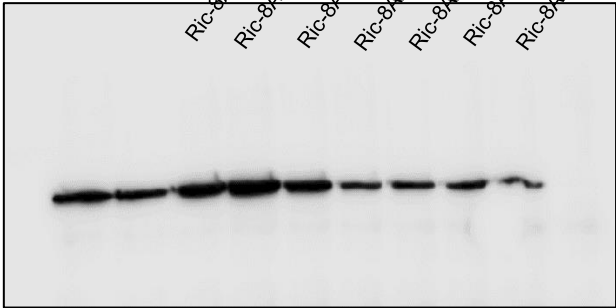

IP: anti-NCS-1  
WB: anti V5

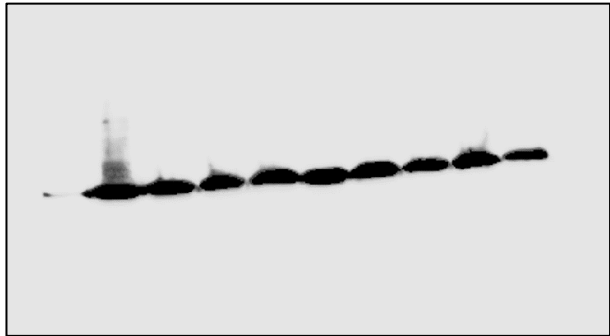

INPUT  
Ric8a-V5

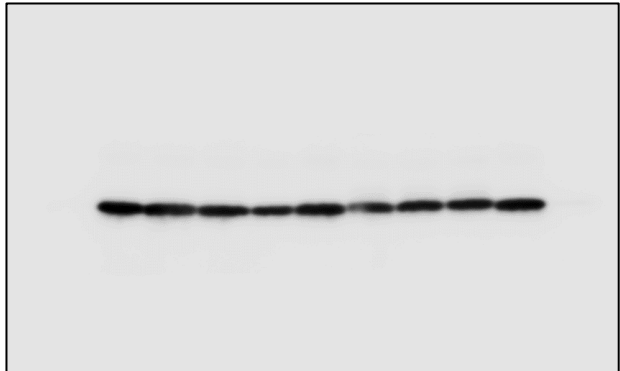

INPUT  
NCS-1
