# Supplementary material for: The neuronal calcium sensor NCS-1 regulates the phosphorylation state and activity of the Gα chaperone and GEF Ric-8A
Source: eLife journal article supplement (doi:10.7554/elife.86151), 2023-11-27
Supplement: supp [file Fig2A-SEC-chromatograms.xlsx]

## Sheet: 1st superpos (2)
CA2+ PRELOADED		CA2+ FREE		EGTA TO CA2+
UV		UV		UV
ml	mAU	ml	mAU	ml	mAU
-0.008969	0	-0.008959	0	-0.009004	-0.128955
-0.008137	1.64877	-0.008127	-0.529463	-0.008172	-0.055294
-0.007305	1.64935	-0.007295	-0.529955	-0.00734	-0.056533
-0.006473	1.65057	-0.006463	-0.530317	-0.006509	-0.057735
-0.005641	1.65336	-0.005631	-0.531382	-0.005677	-0.062812
-0.004809	1.65694	-0.004799	-0.535211	-0.004845	-0.070213
-0.003977	1.66075	-0.003967	-0.535928	-0.004013	-0.07436
-0.003145	1.66149	-0.003135	-0.536735	-0.003181	-0.07552
-0.002313	1.66192	-0.002303	-0.53763	-0.002349	-0.076699
-0.001481	1.66308	-0.001471	-0.538369	-0.001517	-0.078803
-0.000649	1.66399	-0.000639	-0.538536	-0.000685	-0.080722
0.000183	1.665	0.000193	-0.539229	0.000147	-0.081957
0.001015	1.66603	0.001025	-0.540446	0.000979	-0.083007
0.001847	1.66767	0.001857	-0.540912	0.001811	-0.084647
0.002679	1.6682	0.002689	-0.54136	0.002643	-0.086262
0.003511	1.66895	0.003521	-0.542079	0.003475	-0.088168
0.004343	1.66978	0.004353	-0.542581	0.004307	-0.089702
0.005175	1.67074	0.005185	-0.54305	0.005139	-0.090628
0.006007	1.67152	0.006017	-0.543125	0.005971	-0.091613
0.006839	1.67206	0.006849	-0.543772	0.006803	-0.092599
0.007671	1.67252	0.007681	-0.544539	0.007635	-0.09327
0.008503	1.67352	0.008513	-0.544929	0.008467	-0.094467
0.009335	1.67404	0.009345	-0.545361	0.009299	-0.095402
0.010167	1.6748	0.010177	-0.545704	0.010131	-0.097029
0.010999	1.67585	0.011009	-0.545997	0.010963	-0.098101
0.011831	1.67684	0.011841	-0.545878	0.011795	-0.099383
0.012663	1.67709	0.012673	-0.545796	0.012627	-0.100349
0.013495	1.67739	0.013505	-0.545982	0.013458	-0.101529
0.014327	1.67743	0.014337	-0.546692	0.01429	-0.10331
0.015159	1.6783	0.015169	-0.547638	0.015122	-0.105139
0.015991	1.67856	0.016001	-0.548116	0.015954	-0.106326
0.016823	1.67927	0.016833	-0.548251	0.016786	-0.107344
0.017655	1.68023	0.017665	-0.54884	0.017618	-0.108198
0.018487	1.68102	0.018497	-0.549317	0.01845	-0.109184
0.019319	1.68173	0.019329	-0.549889	0.019282	-0.110007
0.020151	1.68248	0.020161	-0.549987	0.020114	-0.112083
0.020983	1.6826	0.020993	-0.550104	0.020946	-0.112654
0.021815	1.68217	0.021825	-0.550131	0.021778	-0.112915
0.022647	1.68251	0.022657	-0.549546	0.02261	-0.113204
0.023479	1.68239	0.023489	-0.548655	0.023442	-0.113227
0.024311	1.68282	0.024321	-0.548604	0.024274	-0.112809
0.025143	1.68316	0.025153	-0.548663	0.025106	-0.112727
0.025975	1.68271	0.025985	-0.548438	0.025938	-0.113067
0.026807	1.682	0.026817	-0.548466	0.02677	-0.113288
0.027639	1.68219	0.027649	-0.548391	0.027602	-0.1132
0.028471	1.68195	0.028481	-0.548568	0.028434	-0.113201
0.029303	1.68223	0.029313	-0.54893	0.029266	-0.113549
0.030135	1.68281	0.030145	-0.548938	0.030098	-0.113856
0.030967	1.68272	0.030977	-0.547917	0.03093	-0.114197
0.031799	1.68312	0.031809	-0.547433	0.031762	-0.114383
0.032631	1.68301	0.032641	-0.547451	0.032594	-0.114411
0.033463	1.68259	0.033473	-0.547399	0.033425	-0.114255
0.034295	1.68248	0.034306	-0.546618	0.034257	-0.114161
0.035127	1.68164	0.035138	-0.546355	0.035089	-0.114128
0.035959	1.68118	0.03597	-0.546046	0.035921	-0.114236
0.036791	1.68058	0.036802	-0.545766	0.036753	-0.11409
0.037623	1.68079	0.037634	-0.545421	0.037585	-0.114113
0.038455	1.68042	0.038466	-0.544454	0.038417	-0.113566
0.039287	1.68037	0.039298	-0.54309	0.039249	-0.11279
0.040119	1.67986	0.04013	-0.542362	0.040081	-0.111704
0.040951	1.67984	0.040962	-0.54171	0.040913	-0.110494
0.041783	1.67974	0.041794	-0.539844	0.041745	-0.110873
0.042615	1.67963	0.042626	-0.537814	0.042577	-0.110564
0.043447	1.67925	0.043458	-0.536532	0.043409	-0.109428
0.044279	1.67994	0.04429	-0.534861	0.044241	-0.107803
0.045111	1.68073	0.045122	-0.532956	0.045073	-0.105738
0.045943	1.68093	0.045954	-0.531363	0.045905	-0.104328
0.046775	1.68124	0.046786	-0.53008	0.046737	-0.103167
0.047607	1.68178	0.047618	-0.528573	0.047569	-0.101706
0.048439	1.68284	0.04845	-0.526597	0.048401	-0.100465
0.049271	1.68395	0.049282	-0.524568	0.049233	-0.099708
0.050103	1.68429	0.050114	-0.522347	0.050065	-0.098546
0.050935	1.68483	0.050946	-0.52009	0.050897	-0.097031
0.051767	1.68583	0.051778	-0.517487	0.051729	-0.094492
0.052599	1.68697	0.05261	-0.514753	0.052561	-0.092184
0.053431	1.68832	0.053442	-0.512077	0.053392	-0.089648
0.054263	1.69048	0.054274	-0.509326	0.054224	-0.087936
0.055095	1.69279	0.055106	-0.506625	0.055056	-0.086562
0.055927	1.69492	0.055938	-0.503615	0.055888	-0.084227
0.056759	1.69619	0.05677	-0.499795	0.05672	-0.081379
0.057591	1.69777	0.057602	-0.496036	0.057552	-0.078805
0.058423	1.69965	0.058434	-0.492315	0.058384	-0.076968
0.059255	1.70136	0.059266	-0.488466	0.059216	-0.074858
0.060087	1.70268	0.060098	-0.484274	0.060048	-0.072526
0.060919	1.70384	0.06093	-0.4801	0.06088	-0.070135
0.061751	1.70482	0.061762	-0.476321	0.061712	-0.06635
0.062583	1.70656	0.062594	-0.472578	0.062544	-0.063358
0.063415	1.70889	0.063426	-0.469506	0.063376	-0.060958
0.064247	1.71023	0.064258	-0.466053	0.064208	-0.057527
0.065079	1.71071	0.06509	-0.461453	0.06504	-0.054994
0.065911	1.71139	0.065922	-0.4568	0.065872	-0.052498
0.066743	1.71325	0.066754	-0.452408	0.066704	-0.049333
0.067575	1.71529	0.067586	-0.448232	0.067536	-0.04568
0.068407	1.71675	0.068418	-0.444372	0.068368	-0.042795
0.069239	1.71799	0.06925	-0.439802	0.0692	-0.040811
0.070071	1.71931	0.070082	-0.434447	0.070032	-0.037771
0.070903	1.72092	0.070914	-0.428776	0.070864	-0.034038
0.071735	1.72272	0.071746	-0.423629	0.071696	-0.030149
0.072567	1.72423	0.072578	-0.418864	0.072527	-0.026396
0.073399	1.72501	0.07341	-0.413262	0.073359	-0.023274
0.074231	1.72614	0.074242	-0.406377	0.074191	-0.019934
0.075063	1.72797	0.075074	-0.400109	0.075023	-0.01674
0.075895	1.73036	0.075906	-0.393963	0.075855	-0.01362
0.076727	1.73223	0.076738	-0.38828	0.076687	-0.009806
0.077559	1.73313	0.07757	-0.382874	0.077519	-0.006484
0.078391	1.73366	0.078402	-0.377012	0.078351	-0.002927
0.079223	1.73508	0.079234	-0.371354	0.079183	0.000917
0.080055	1.73645	0.080067	-0.366289	0.080015	0.004313
0.080887	1.73785	0.080899	-0.360952	0.080847	0.008018
0.081719	1.73948	0.081731	-0.354913	0.081679	0.0116
0.082551	1.74125	0.082563	-0.348839	0.082511	0.014955
0.083383	1.74314	0.083395	-0.343024	0.083343	0.019369
0.084215	1.74411	0.084227	-0.336803	0.084175	0.023326
0.085047	1.74564	0.085059	-0.330562	0.085007	0.026511
0.085879	1.74697	0.085891	-0.325175	0.085839	0.028991
0.086711	1.74805	0.086723	-0.319229	0.086671	0.031685
0.087543	1.74935	0.087555	-0.312887	0.087503	0.034935
0.088375	1.75087	0.088387	-0.306466	0.088335	0.037831
0.089207	1.75255	0.089219	-0.300033	0.089167	0.040643
0.090039	1.75347	0.090051	-0.293247	0.089999	0.043636
0.090871	1.7547	0.090883	-0.28661	0.090831	0.046906
0.091703	1.75683	0.091715	-0.2804	0.091663	0.050283
0.092535	1.7588	0.092547	-0.27423	0.092494	0.053117
0.093367	1.76017	0.093379	-0.268042	0.093326	0.055523
0.094199	1.76102	0.094211	-0.262199	0.094158	0.057686
0.095031	1.76143	0.095043	-0.256047	0.09499	0.059384
0.095863	1.76248	0.095875	-0.250121	0.095822	0.061912
0.096695	1.76335	0.096707	-0.243605	0.096654	0.065667
0.097527	1.76419	0.097539	-0.236297	0.097486	0.068737
0.098359	1.76588	0.098371	-0.228915	0.098318	0.070984
0.099191	1.76766	0.099203	-0.222367	0.09915	0.072921
0.100023	1.76835	0.100035	-0.215843	0.099982	0.075872
0.100855	1.76906	0.100867	-0.20823	0.100814	0.078604
0.101687	1.77038	0.101699	-0.201466	0.101646	0.080851
0.102519	1.77261	0.102531	-0.194208	0.102478	0.083764
0.103351	1.77454	0.103363	-0.186346	0.10331	0.086941
0.104183	1.77694	0.104195	-0.177868	0.104142	0.09008
0.105015	1.77805	0.105027	-0.168086	0.104974	0.093011
0.105847	1.7802	0.105859	-0.160491	0.105806	0.096158
0.106679	1.78356	0.106691	-0.152677	0.106638	0.099885
0.107511	1.78596	0.107523	-0.14392	0.10747	0.10299
0.108343	1.78754	0.108355	-0.134625	0.108302	0.105621
0.109175	1.79028	0.109187	-0.125393	0.109134	0.10835
0.110007	1.79337	0.110019	-0.114725	0.109966	0.111831
0.110839	1.79682	0.110851	-0.104903	0.110798	0.116361
0.111671	1.79972	0.111683	-0.096133	0.11163	0.120232
0.112503	1.80243	0.112515	-0.087438	0.112461	0.124044
0.113335	1.80426	0.113347	-0.07906	0.113293	0.128432
0.114167	1.80797	0.114179	-0.069395	0.114125	0.132517
0.114999	1.81224	0.115011	-0.060209	0.114957	0.137722
0.115831	1.81621	0.115843	-0.051959	0.115789	0.142923
0.116663	1.81943	0.116675	-0.043744	0.116621	0.147302
0.117495	1.8233	0.117507	-0.034035	0.117453	0.152884
0.118327	1.82746	0.118339	-0.025083	0.118285	0.157721
0.119159	1.83168	0.119171	-0.016372	0.119117	0.162913
0.119991	1.83563	0.120003	-0.005872	0.119949	0.16922
0.120823	1.84027	0.120835	0.005329	0.120781	0.175853
0.121655	1.84575	0.121667	0.015748	0.121613	0.182109
0.122487	1.85143	0.122499	0.027216	0.122445	0.188564
0.123319	1.85576	0.123331	0.037876	0.123277	0.195616
0.124151	1.86086	0.124163	0.048223	0.124109	0.20343
0.124983	1.86612	0.124995	0.05848	0.124941	0.21035
0.125815	1.87359	0.125828	0.06873	0.125773	0.217465
0.126647	1.87957	0.12666	0.079745	0.126605	0.224618
0.127479	1.8862	0.127492	0.091926	0.127437	0.232684
0.128311	1.89306	0.128324	0.103872	0.128269	0.2404
0.129143	1.90032	0.129156	0.114782	0.129101	0.247617
0.129975	1.90723	0.129988	0.126294	0.129933	0.255028
0.130807	1.91496	0.13082	0.138985	0.130765	0.263097
0.131639	1.92333	0.131652	0.150632	0.131597	0.27101
0.132471	1.93181	0.132484	0.163219	0.132428	0.279346
0.133303	1.94005	0.133316	0.175163	0.13326	0.288124
0.134135	1.94814	0.134148	0.188009	0.134092	0.296649
0.134967	1.95667	0.13498	0.201084	0.134924	0.305155
0.135799	1.96663	0.135812	0.214696	0.135756	0.313859
0.136631	1.97623	0.136644	0.227516	0.136588	0.323683
0.137463	1.98531	0.137476	0.240535	0.13742	0.333837
0.138295	1.99559	0.138308	0.253858	0.138252	0.342644
0.139127	2.0052	0.13914	0.266494	0.139084	0.352398
0.139959	2.01531	0.139972	0.279557	0.139916	0.362141
0.140791	2.02572	0.140804	0.294581	0.140748	0.37243
0.141623	2.03667	0.141636	0.308278	0.14158	0.382156
0.142455	2.04871	0.142468	0.322219	0.142412	0.391464
0.143287	2.06085	0.1433	0.33597	0.143244	0.40094
0.144119	2.07292	0.144132	0.348607	0.144076	0.410374
0.144951	2.08562	0.144964	0.361856	0.144908	0.419597
0.145783	2.09759	0.145796	0.3736	0.14574	0.428915
0.146615	2.10987	0.146628	0.38558	0.146572	0.438118
0.147447	2.12352	0.14746	0.397967	0.147404	0.446941
0.148279	2.13731	0.148292	0.409068	0.148236	0.455955
0.149111	2.15122	0.149124	0.419509	0.149068	0.464078
0.149943	2.16585	0.149956	0.430036	0.1499	0.471561
0.150775	2.18079	0.150788	0.440303	0.150732	0.478764
0.151607	2.19525	0.15162	0.450026	0.151564	0.485697
0.152439	2.20898	0.152452	0.458659	0.152395	0.491754
0.153271	2.22331	0.153284	0.469787	0.153227	0.49766
0.154103	2.23957	0.154116	0.480693	0.154059	0.503767
0.154935	2.25516	0.154948	0.491153	0.154891	0.509977
0.155767	2.27144	0.15578	0.500383	0.155723	0.515922
0.156599	2.28716	0.156612	0.509504	0.156555	0.52033
0.157431	2.30269	0.157444	0.519234	0.157387	0.524963
0.158263	2.31879	0.158276	0.528211	0.158219	0.529883
0.159095	2.33384	0.159108	0.536428	0.159051	0.534227
0.159927	2.35017	0.15994	0.544359	0.159883	0.53869
0.160759	2.36594	0.160772	0.552495	0.160715	0.54257
0.161591	2.38225	0.161604	0.560095	0.161547	0.544584
0.162423	2.39929	0.162436	0.566705	0.162379	0.545636
0.163255	2.41415	0.163268	0.573138	0.163211	0.546395
0.164087	2.42911	0.1641	0.578818	0.164043	0.546598
0.164919	2.44247	0.164932	0.583514	0.164875	0.545864
0.165751	2.45572	0.165764	0.588487	0.165707	0.54477
0.166583	2.46846	0.166596	0.593129	0.166539	0.543526
0.167415	2.48032	0.167428	0.597605	0.167371	0.542292
0.168247	2.49158	0.16826	0.60142	0.168203	0.540736
0.169079	2.50269	0.169092	0.604892	0.169035	0.539076
0.169911	2.51366	0.169924	0.607082	0.169867	0.537087
0.170743	2.52447	0.170756	0.607857	0.170699	0.534132
0.171575	2.53453	0.171588	0.608968	0.171531	0.530977
0.172407	2.54372	0.172421	0.60868	0.172362	0.528362
0.173239	2.55254	0.173253	0.607892	0.173194	0.525553
0.174071	2.5609	0.174085	0.606508	0.174026	0.521256
0.174903	2.56855	0.174917	0.604361	0.174858	0.516459
0.175735	2.57582	0.175749	0.60338	0.17569	0.511664
0.176567	2.58294	0.176581	0.601087	0.176522	0.506474
0.177399	2.58967	0.177413	0.59769	0.177354	0.500721
0.178231	2.59562	0.178245	0.593614	0.178186	0.493609
0.179063	2.60055	0.179077	0.589566	0.179018	0.487085
0.179895	2.60508	0.179909	0.584705	0.17985	0.480867
0.180727	2.6088	0.180741	0.580187	0.180682	0.474242
0.181559	2.61203	0.181573	0.574039	0.181514	0.466312
0.182391	2.61549	0.182405	0.567063	0.182346	0.458881
0.183223	2.61747	0.183237	0.558228	0.183178	0.450992
0.184055	2.6189	0.184069	0.548705	0.18401	0.442658
0.184887	2.62013	0.184901	0.539562	0.184842	0.434317
0.185719	2.62033	0.185733	0.529722	0.185674	0.426133
0.186551	2.61951	0.186565	0.520226	0.186506	0.416866
0.187383	2.61766	0.187397	0.510054	0.187338	0.407472
0.188215	2.61556	0.188229	0.4997	0.18817	0.39953
0.189047	2.61377	0.189061	0.489423	0.189002	0.390875
0.189879	2.61096	0.189893	0.479126	0.189834	0.382005
0.190711	2.60718	0.190725	0.468059	0.190666	0.374089
0.191543	2.60335	0.191557	0.457012	0.191498	0.366047
0.192375	2.59896	0.192389	0.44628	0.192329	0.35827
0.193207	2.59385	0.193221	0.435274	0.193161	0.350355
0.194039	2.58888	0.194053	0.423639	0.193993	0.343037
0.194871	2.58395	0.194885	0.411918	0.194825	0.335018
0.195703	2.57833	0.195717	0.399144	0.195657	0.326245
0.196535	2.57092	0.196549	0.38558	0.196489	0.315925
0.197367	2.56327	0.197381	0.372531	0.197321	0.307513
0.198199	2.55604	0.198213	0.359748	0.198153	0.299841
0.199031	2.54858	0.199045	0.347297	0.198985	0.291425
0.199863	2.5406	0.199877	0.334435	0.199817	0.283765
0.200695	2.5327	0.200709	0.322041	0.200649	0.275395
0.201527	2.52478	0.201541	0.310301	0.201481	0.26689
0.202359	2.51636	0.202373	0.298254	0.202313	0.258694
0.203191	2.5079	0.203205	0.285713	0.203145	0.25168
0.204023	2.49838	0.204037	0.273164	0.203977	0.244346
0.204855	2.4887	0.204869	0.260223	0.204809	0.236587
0.205687	2.4795	0.205701	0.247579	0.205641	0.229394
0.206519	2.47036	0.206533	0.235634	0.206473	0.222379
0.207351	2.46246	0.207365	0.223821	0.207305	0.215471
0.208183	2.45468	0.208197	0.211887	0.208137	0.209414
0.209015	2.44696	0.209029	0.199865	0.208969	0.203702
0.209847	2.43924	0.209861	0.187919	0.209801	0.197911
0.210679	2.43101	0.210693	0.176385	0.210633	0.19178
0.211511	2.42285	0.211525	0.164956	0.211464	0.185798
0.212343	2.41486	0.212357	0.15395	0.212296	0.180528
0.213175	2.40681	0.213189	0.143561	0.213128	0.17502
0.214007	2.39955	0.214021	0.134122	0.21396	0.169029
0.214839	2.3919	0.214853	0.124033	0.214792	0.163329
0.215671	2.38362	0.215685	0.113883	0.215624	0.157679
0.216503	2.37617	0.216517	0.104337	0.216456	0.152659
0.217335	2.36893	0.217349	0.094576	0.217288	0.147429
0.218167	2.36161	0.218181	0.084826	0.21812	0.142591
0.218999	2.35419	0.219014	0.075797	0.218952	0.13857
0.219831	2.34674	0.219846	0.067016	0.219784	0.133783
0.220663	2.34014	0.220678	0.057387	0.220616	0.130244
0.221495	2.33365	0.22151	0.048401	0.221448	0.125894
0.222327	2.32719	0.222342	0.040261	0.22228	0.119905
0.223159	2.32122	0.223174	0.032488	0.223112	0.114814
0.223991	2.31474	0.224006	0.024936	0.223944	0.110549
0.224823	2.3089	0.224838	0.017898	0.224776	0.105896
0.225655	2.30289	0.22567	0.0114	0.225608	0.101577
0.226487	2.29609	0.226502	0.004333	0.22644	0.097891
0.227319	2.28982	0.227334	-0.003389	0.227272	0.093567
0.228151	2.28383	0.228166	-0.010523	0.228104	0.089739
0.228983	2.27931	0.228998	-0.017668	0.228936	0.086325
0.229815	2.27504	0.22983	-0.02491	0.229768	0.083494
0.230647	2.26973	0.230662	-0.031816	0.2306	0.079478
0.231479	2.26509	0.231494	-0.038535	0.231431	0.075301
0.232311	2.26038	0.232326	-0.044557	0.232263	0.071728
0.233143	2.25595	0.233158	-0.050699	0.233095	0.068506
0.233975	2.25163	0.23399	-0.056915	0.233927	0.065398
0.234807	2.24657	0.234822	-0.063007	0.234759	0.062372
0.235639	2.24111	0.235654	-0.068498	0.235591	0.058992
0.236471	2.23554	0.236486	-0.073781	0.236423	0.055514
0.237303	2.23027	0.237318	-0.07889	0.237255	0.052478
0.238135	2.22587	0.23815	-0.083598	0.238087	0.049696
0.238967	2.22133	0.238982	-0.088101	0.238919	0.047123
0.239799	2.21592	0.239814	-0.092615	0.239751	0.044431
0.240631	2.21054	0.240646	-0.097917	0.240583	0.041918
0.241463	2.2056	0.241478	-0.104082	0.241415	0.038941
0.242295	2.20072	0.24231	-0.109757	0.242247	0.035335
0.243127	2.19532	0.243142	-0.115357	0.243079	0.03109
0.243959	2.18961	0.243974	-0.120688	0.243911	0.027681
0.244791	2.18445	0.244806	-0.125392	0.244743	0.024935
0.245623	2.17941	0.245638	-0.129968	0.245575	0.022345
0.246455	2.17503	0.24647	-0.133842	0.246407	0.019691
0.247287	2.17135	0.247302	-0.138053	0.247239	0.017573
0.248119	2.16749	0.248134	-0.142223	0.248071	0.016247
0.248951	2.16343	0.248966	-0.146682	0.248903	0.014299
0.249783	2.15946	0.249798	-0.150995	0.249735	0.012435
0.250615	2.15552	0.25063	-0.155123	0.250567	0.010427
0.251447	2.15124	0.251462	-0.158888	0.251399	0.007629
0.252279	2.14678	0.252294	-0.163168	0.25223	0.005476
0.253111	2.14261	0.253126	-0.167113	0.253062	0.003343
0.253943	2.13871	0.253958	-0.16992	0.253894	0.001551
0.254775	2.13489	0.25479	-0.173397	0.254726	-0.000761
0.255607	2.13066	0.255622	-0.178303	0.255558	-0.003002
0.256439	2.12664	0.256454	-0.182716	0.25639	-0.005887
0.257271	2.12339	0.257286	-0.186687	0.257222	-0.008935
0.258103	2.11987	0.258118	-0.190754	0.258054	-0.010471
0.258935	2.11645	0.25895	-0.194517	0.258886	-0.012974
0.259767	2.11315	0.259782	-0.198622	0.259718	-0.015068
0.260599	2.10992	0.260614	-0.203066	0.26055	-0.017588
0.261431	2.10713	0.261446	-0.2067	0.261382	-0.020561
0.262263	2.10438	0.262278	-0.209654	0.262214	-0.021964
0.263095	2.10139	0.26311	-0.212541	0.263046	-0.02394
0.263927	2.09834	0.263942	-0.21665	0.263878	-0.026055
0.264759	2.09523	0.264775	-0.221093	0.26471	-0.026976
0.265591	2.09241	0.265607	-0.225137	0.265542	-0.02817
0.266423	2.08955	0.266439	-0.228937	0.266374	-0.029868
0.267255	2.08664	0.267271	-0.232263	0.267206	-0.031755
0.268087	2.08362	0.268103	-0.235435	0.268038	-0.03356
0.268919	2.08085	0.268935	-0.23757	0.26887	-0.035447
0.269751	2.07814	0.269767	-0.239612	0.269702	-0.037247
0.270583	2.07444	0.270599	-0.241641	0.270534	-0.039138
0.271415	2.07136	0.271431	-0.244222	0.271365	-0.040172
0.272247	2.06857	0.272263	-0.246885	0.272197	-0.04283
0.273079	2.06541	0.273095	-0.249764	0.273029	-0.043629
0.273911	2.0624	0.273927	-0.252739	0.273861	-0.045331
0.274743	2.05895	0.274759	-0.255974	0.274693	-0.04774
0.275575	2.05561	0.275591	-0.259122	0.275525	-0.049349
0.276407	2.05278	0.276423	-0.261869	0.276357	-0.051392
0.277239	2.05022	0.277255	-0.266177	0.277189	-0.054645
0.278071	2.04778	0.278087	-0.270185	0.278021	-0.055737
0.278903	2.04481	0.278919	-0.273456	0.278853	-0.057448
0.279735	2.0412	0.279751	-0.276881	0.279685	-0.059894
0.280567	2.03828	0.280583	-0.28026	0.280517	-0.061613
0.281399	2.03575	0.281415	-0.283157	0.281349	-0.062596
0.282231	2.03311	0.282247	-0.285248	0.282181	-0.064796
0.283063	2.03077	0.283079	-0.28647	0.283013	-0.066417
0.283895	2.02826	0.283911	-0.288522	0.283845	-0.068239
0.284727	2.02631	0.284743	-0.290598	0.284677	-0.070243
0.285559	2.02434	0.285575	-0.292869	0.285509	-0.072033
0.286391	2.0218	0.286407	-0.295108	0.286341	-0.07345
0.287223	2.01964	0.287239	-0.29783	0.287173	-0.075972
0.288055	2.01787	0.288071	-0.300502	0.288005	-0.078001
0.288887	2.01564	0.288903	-0.302554	0.288837	-0.079489
0.289719	2.01298	0.289735	-0.305419	0.289669	-0.082057
0.290551	2.01031	0.290567	-0.307427	0.290501	-0.083789
0.291383	2.0075	0.291399	-0.30951	0.291332	-0.084881
0.292215	2.00579	0.292231	-0.311788	0.292164	-0.085774
0.293047	2.00474	0.293063	-0.314359	0.292996	-0.086279
0.293879	2.00314	0.293895	-0.316977	0.293828	-0.08825
0.294711	2.00144	0.294727	-0.319586	0.29466	-0.090429
0.295543	1.99936	0.295559	-0.322451	0.295492	-0.092284
0.296375	1.99735	0.296391	-0.325063	0.296324	-0.093238
0.297207	1.99569	0.297223	-0.325393	0.297156	-0.093837
0.298039	1.99438	0.298055	-0.326852	0.297988	-0.093988
0.298871	1.99259	0.298887	-0.328938	0.29882	-0.094872
0.299703	1.99077	0.299719	-0.330642	0.299652	-0.096767
0.300535	1.98876	0.300551	-0.332654	0.300484	-0.098049
0.301367	1.98638	0.301383	-0.334097	0.301316	-0.099366
0.302199	1.9846	0.302215	-0.335835	0.302148	-0.100262
0.303031	1.98251	0.303047	-0.337914	0.30298	-0.100644
0.303863	1.98066	0.303879	-0.340058	0.303812	-0.101943
0.304695	1.97888	0.304711	-0.342735	0.304644	-0.103421
0.305527	1.97768	0.305543	-0.344615	0.305476	-0.104908
0.306359	1.97628	0.306375	-0.346253	0.306308	-0.107195
0.307191	1.97396	0.307207	-0.34792	0.30714	-0.109116
0.308023	1.97173	0.308039	-0.348745	0.307972	-0.110765
0.308855	1.96997	0.308871	-0.351116	0.308804	-0.112071
0.309687	1.96845	0.309703	-0.352778	0.309636	-0.113285
0.310519	1.96676	0.310535	-0.354228	0.310468	-0.114218
0.311351	1.96532	0.311368	-0.356827	0.311299	-0.115245
0.312183	1.96399	0.3122	-0.357947	0.312131	-0.116412
0.313015	1.96183	0.313032	-0.358914	0.312963	-0.117964
0.313847	1.9596	0.313864	-0.360932	0.313795	-0.118462
0.314679	1.95754	0.314696	-0.362907	0.314627	-0.120484
0.315511	1.95588	0.315528	-0.36457	0.315459	-0.121623
0.316343	1.95436	0.31636	-0.365094	0.316291	-0.122562
0.317175	1.95281	0.317192	-0.366827	0.317123	-0.124036
0.318007	1.95102	0.318024	-0.368495	0.317955	-0.125023
0.318839	1.94978	0.318856	-0.368287	0.318787	-0.125373
0.319671	1.9486	0.319688	-0.369427	0.319619	-0.126314
0.320503	1.94763	0.32052	-0.370343	0.320451	-0.127084
0.321335	1.9469	0.321352	-0.371619	0.321283	-0.126957
0.322167	1.94542	0.322184	-0.37381	0.322115	-0.127572
0.322999	1.94431	0.323016	-0.376087	0.322947	-0.128638
0.323831	1.94282	0.323848	-0.377515	0.323779	-0.129433
0.324663	1.94075	0.32468	-0.379669	0.324611	-0.130143
0.325495	1.93924	0.325512	-0.381278	0.325443	-0.130099
0.326327	1.93811	0.326344	-0.383333	0.326275	-0.129534
0.327159	1.93774	0.327176	-0.384914	0.327107	-0.129014
0.327991	1.93696	0.328008	-0.386299	0.327939	-0.129869
0.328823	1.93545	0.32884	-0.387967	0.328771	-0.1301
0.329655	1.93293	0.329672	-0.389771	0.329603	-0.130593
0.330487	1.93104	0.330504	-0.391157	0.330435	-0.131535
0.331319	1.92976	0.331336	-0.39276	0.331266	-0.13245
0.332151	1.92839	0.332168	-0.394438	0.332098	-0.133143
0.332983	1.92823	0.333	-0.395177	0.33293	-0.133956
0.333815	1.92628	0.333832	-0.396418	0.333762	-0.135338
0.334647	1.92509	0.334664	-0.398606	0.334594	-0.138172
0.335479	1.92439	0.335496	-0.399755	0.335426	-0.140025
0.336311	1.92314	0.336328	-0.401078	0.336258	-0.141196
0.337143	1.92276	0.33716	-0.402604	0.33709	-0.142455
0.337975	1.92079	0.337992	-0.403629	0.337922	-0.144113
0.338807	1.91946	0.338824	-0.405944	0.338754	-0.145466
0.339639	1.91772	0.339656	-0.408022	0.339586	-0.147194
0.340471	1.9163	0.340488	-0.409013	0.340418	-0.148489
0.341303	1.91553	0.34132	-0.410484	0.34125	-0.148972
0.342135	1.91452	0.342152	-0.412071	0.342082	-0.149836
0.342967	1.91363	0.342984	-0.413384	0.342914	-0.150891
0.343799	1.91251	0.343816	-0.415041	0.343746	-0.15206
0.344631	1.91116	0.344648	-0.416532	0.344578	-0.153222
0.345463	1.90991	0.34548	-0.417556	0.34541	-0.154864
0.346295	1.90894	0.346312	-0.418714	0.346242	-0.156096
0.347127	1.90748	0.347144	-0.419026	0.347074	-0.156836
0.347959	1.90562	0.347976	-0.420066	0.347906	-0.157471
0.348791	1.9043	0.348808	-0.421362	0.348738	-0.15839
0.349623	1.90264	0.34964	-0.423696	0.34957	-0.159214
0.350455	1.90177	0.350472	-0.423707	0.350402	-0.160022
0.351287	1.90091	0.351304	-0.424814	0.351233	-0.160694
0.352119	1.90032	0.352136	-0.426668	0.352065	-0.161537
0.352951	1.89867	0.352968	-0.427824	0.352897	-0.162159
0.353783	1.89721	0.3538	-0.430138	0.353729	-0.162656
0.354615	1.89704	0.354632	-0.430932	0.354561	-0.163542
0.355447	1.89729	0.355464	-0.432212	0.355393	-0.164823
0.356279	1.89623	0.356296	-0.433376	0.356225	-0.165542
0.357111	1.89469	0.357129	-0.434147	0.357057	-0.166568
0.357943	1.89314	0.357961	-0.435629	0.357889	-0.167645
0.358775	1.89311	0.358793	-0.43576	0.358721	-0.168675
0.359607	1.89242	0.359625	-0.436261	0.359553	-0.169106
0.360439	1.8905	0.360457	-0.437778	0.360385	-0.16933
0.361271	1.88957	0.361289	-0.437906	0.361217	-0.170762
0.362103	1.88829	0.362121	-0.439037	0.362049	-0.171972
0.362935	1.88739	0.362953	-0.438751	0.362881	-0.173056
0.363767	1.88591	0.363785	-0.439285	0.363713	-0.174377
0.364599	1.8843	0.364617	-0.439609	0.364545	-0.175815
0.365431	1.88367	0.365449	-0.440735	0.365377	-0.177083
0.366263	1.8834	0.366281	-0.441695	0.366209	-0.178676
0.367095	1.88205	0.367113	-0.443052	0.367041	-0.180038
0.367927	1.88156	0.367945	-0.443484	0.367873	-0.181049
0.368759	1.87996	0.368777	-0.444842	0.368705	-0.18236
0.369591	1.87887	0.369609	-0.445741	0.369537	-0.183144
0.370423	1.87798	0.370441	-0.445285	0.370369	-0.183901
0.371255	1.87764	0.371273	-0.445987	0.3712	-0.184866
0.372087	1.87746	0.372105	-0.446558	0.372032	-0.18522
0.372919	1.87777	0.372937	-0.447236	0.372864	-0.185347
0.373751	1.8772	0.373769	-0.448103	0.373696	-0.186019
0.374583	1.87596	0.374601	-0.448317	0.374528	-0.18715
0.375415	1.8759	0.375433	-0.448351	0.37536	-0.187467
0.376247	1.87504	0.376265	-0.448244	0.376192	-0.187568
0.377079	1.87363	0.377097	-0.449214	0.377024	-0.187922
0.377911	1.87302	0.377929	-0.449711	0.377856	-0.188286
0.378743	1.87218	0.378761	-0.450815	0.378688	-0.188758
0.379575	1.87215	0.379593	-0.451667	0.37952	-0.189522
0.380407	1.87199	0.380425	-0.452104	0.380352	-0.190568
0.381239	1.87148	0.381257	-0.452143	0.381184	-0.191295
0.382071	1.87095	0.382089	-0.453382	0.382016	-0.192324
0.382903	1.86936	0.382921	-0.454024	0.382848	-0.193695
0.383735	1.86919	0.383753	-0.45462	0.38368	-0.195056
0.384567	1.86862	0.384585	-0.455564	0.384512	-0.196007
0.385399	1.86788	0.385417	-0.456018	0.385344	-0.196923
0.386231	1.86714	0.386249	-0.456551	0.386176	-0.197463
0.387063	1.86591	0.387081	-0.456813	0.387008	-0.197969
0.387895	1.86502	0.387913	-0.457484	0.38784	-0.198758
0.388727	1.86366	0.388745	-0.458837	0.388672	-0.199482
0.389559	1.86343	0.389577	-0.459029	0.389504	-0.200154
0.390391	1.86326	0.390409	-0.459558	0.390336	-0.200893
0.391223	1.86297	0.391241	-0.459904	0.391167	-0.201
0.392055	1.86234	0.392073	-0.461194	0.391999	-0.200909
0.392887	1.86153	0.392905	-0.461999	0.392831	-0.201461
0.393719	1.8603	0.393737	-0.462397	0.393663	-0.202091
0.394551	1.8597	0.394569	-0.462911	0.394495	-0.202803
0.395383	1.85862	0.395401	-0.463416	0.395327	-0.203719
0.396215	1.85735	0.396233	-0.464437	0.396159	-0.204422
0.397047	1.85604	0.397065	-0.464707	0.396991	-0.204281
0.397879	1.85564	0.397897	-0.465983	0.397823	-0.204648
0.398711	1.85491	0.398729	-0.467134	0.398655	-0.205356
0.399543	1.85417	0.399561	-0.468077	0.399487	-0.206042
0.400375	1.85342	0.400393	-0.469272	0.400319	-0.206556
0.401207	1.85276	0.401225	-0.470568	0.401151	-0.20821
0.402039	1.85225	0.402057	-0.470919	0.401983	-0.209256
0.402871	1.85105	0.402889	-0.471542	0.402815	-0.209719
0.403703	1.84928	0.403722	-0.472067	0.403647	-0.210673
0.404535	1.8483	0.404554	-0.472989	0.404479	-0.21225
0.405367	1.84857	0.405386	-0.473237	0.405311	-0.21272
0.406199	1.84871	0.406218	-0.473999	0.406143	-0.212978
0.407031	1.84819	0.40705	-0.475259	0.406975	-0.21362
0.407863	1.84777	0.407882	-0.476073	0.407807	-0.213664
0.408695	1.84705	0.408714	-0.476623	0.408639	-0.214409
0.409527	1.84546	0.409546	-0.476765	0.409471	-0.215641
0.410359	1.84464	0.410378	-0.477292	0.410302	-0.216282
0.411191	1.84402	0.41121	-0.478377	0.411134	-0.217527
0.412023	1.84333	0.412042	-0.479542	0.411966	-0.218635
0.412855	1.84289	0.412874	-0.480899	0.412798	-0.21917
0.413687	1.84192	0.413706	-0.482128	0.41363	-0.219351
0.414519	1.84048	0.414538	-0.482496	0.414462	-0.220144
0.415351	1.83843	0.41537	-0.483397	0.415294	-0.221058
0.416183	1.83649	0.416202	-0.484638	0.416126	-0.222038
0.417015	1.83541	0.417034	-0.485676	0.416958	-0.222843
0.417847	1.83514	0.417866	-0.486564	0.41779	-0.222626
0.418679	1.83412	0.418698	-0.48697	0.418622	-0.22308
0.419511	1.83302	0.41953	-0.487291	0.419454	-0.223691
0.420343	1.83228	0.420362	-0.487613	0.420286	-0.224513
0.421175	1.83154	0.421194	-0.488542	0.421118	-0.225023
0.422007	1.83083	0.422026	-0.490124	0.42195	-0.225059
0.422839	1.83044	0.422858	-0.490998	0.422782	-0.225394
0.423671	1.83061	0.42369	-0.491616	0.423614	-0.226546
0.424503	1.83005	0.424522	-0.492945	0.424446	-0.226224
0.425335	1.82861	0.425354	-0.493938	0.425278	-0.226309
0.426167	1.82767	0.426186	-0.494196	0.42611	-0.226115
0.426999	1.82705	0.427018	-0.494602	0.426942	-0.227367
0.427831	1.82675	0.42785	-0.495858	0.427774	-0.229292
0.428663	1.82641	0.428682	-0.497308	0.428606	-0.229776
0.429495	1.82503	0.429514	-0.49784	0.429438	-0.230248
0.430327	1.82399	0.430346	-0.498296	0.430269	-0.230387
0.431159	1.82229	0.431178	-0.498757	0.431101	-0.230007
0.431991	1.82256	0.43201	-0.499302	0.431933	-0.23021
0.432823	1.82178	0.432842	-0.499894	0.432765	-0.230969
0.433655	1.82095	0.433674	-0.499924	0.433597	-0.231849
0.434487	1.82014	0.434506	-0.500396	0.434429	-0.231878
0.435319	1.82011	0.435338	-0.501545	0.435261	-0.233214
0.436151	1.81939	0.43617	-0.502291	0.436093	-0.234039
0.436983	1.81932	0.437002	-0.503153	0.436925	-0.235009
0.437815	1.81906	0.437834	-0.504109	0.437757	-0.236095
0.438647	1.8189	0.438666	-0.504161	0.438589	-0.238036
0.439479	1.81864	0.439498	-0.503418	0.439421	-0.23863
0.440311	1.81835	0.44033	-0.503544	0.440253	-0.238889
0.441143	1.81789	0.441162	-0.504	0.441085	-0.238608
0.441975	1.81675	0.441994	-0.504474	0.441917	-0.239027
0.442807	1.81602	0.442826	-0.503875	0.442749	-0.239085
0.443639	1.81604	0.443658	-0.504896	0.443581	-0.240864
0.444471	1.81591	0.44449	-0.505327	0.444413	-0.240936
0.445303	1.81627	0.445322	-0.506023	0.445245	-0.241401
0.446135	1.817	0.446154	-0.506592	0.446077	-0.240882
0.446967	1.81758	0.446986	-0.506821	0.446909	-0.241928
0.447799	1.81741	0.447818	-0.507619	0.447741	-0.24224
0.448631	1.81617	0.44865	-0.507748	0.448573	-0.242552
0.449463	1.8151	0.449483	-0.507343	0.449405	-0.243951
0.450295	1.81441	0.450315	-0.507143	0.450236	-0.243367
0.451127	1.81404	0.451147	-0.507352	0.451068	-0.243454
0.451959	1.81324	0.451979	-0.507393	0.4519	-0.243817
0.452791	1.81334	0.452811	-0.507191	0.452732	-0.243938
0.453623	1.81306	0.453643	-0.507272	0.453564	-0.242894
0.454455	1.81349	0.454475	-0.507686	0.454396	-0.24325
0.455287	1.81202	0.455307	-0.50781	0.455228	-0.244464
0.456119	1.81213	0.456139	-0.507497	0.45606	-0.244988
0.456951	1.81116	0.456971	-0.507613	0.456892	-0.246031
0.457783	1.81126	0.457803	-0.507718	0.457724	-0.246068
0.458615	1.81157	0.458635	-0.508348	0.458556	-0.246343
0.459447	1.81127	0.459467	-0.508467	0.459388	-0.24697
0.460279	1.80991	0.460299	-0.508881	0.46022	-0.247431
0.461111	1.80912	0.461131	-0.509292	0.461052	-0.248975
0.461943	1.80909	0.461963	-0.5106	0.461884	-0.249347
0.462775	1.80831	0.462795	-0.511363	0.462716	-0.250361
0.463607	1.80793	0.463627	-0.511847	0.463548	-0.250204
0.464439	1.80789	0.464459	-0.511989	0.46438	-0.250015
0.465271	1.80801	0.465291	-0.51165	0.465212	-0.250231
0.466103	1.80675	0.466123	-0.512033	0.466044	-0.251656
0.466935	1.80593	0.466955	-0.512939	0.466876	-0.252146
0.467767	1.80552	0.467787	-0.51266	0.467708	-0.253191
0.468599	1.80559	0.468619	-0.512601	0.46854	-0.252858
0.469431	1.80506	0.469451	-0.514308	0.469371	-0.252676
0.470263	1.80448	0.470283	-0.514838	0.470203	-0.253535
0.471095	1.80418	0.471115	-0.514388	0.471035	-0.25333
0.471927	1.80432	0.471947	-0.513989	0.471867	-0.254434
0.472759	1.80514	0.472779	-0.514696	0.472699	-0.256154
0.473591	1.80534	0.473611	-0.515033	0.473531	-0.256818
0.474423	1.80411	0.474443	-0.515437	0.474363	-0.257912
0.475255	1.80411	0.475275	-0.515943	0.475195	-0.258835
0.476087	1.80394	0.476107	-0.516905	0.476027	-0.259337
0.476919	1.80322	0.476939	-0.517899	0.476859	-0.259157
0.477751	1.80242	0.477771	-0.517642	0.477691	-0.260004
0.478583	1.80258	0.478603	-0.518516	0.478523	-0.259938
0.479415	1.80229	0.479435	-0.51849	0.479355	-0.259513
0.480247	1.80119	0.480267	-0.518103	0.480187	-0.259228
0.481079	1.80031	0.481099	-0.518982	0.481019	-0.25949
0.481911	1.80075	0.481931	-0.520355	0.481851	-0.26059
0.482743	1.80036	0.482763	-0.521862	0.482683	-0.262241
0.483575	1.79974	0.483595	-0.522818	0.483515	-0.262758
0.484407	1.79983	0.484427	-0.523924	0.484347	-0.262369
0.485239	1.79972	0.485259	-0.525351	0.485179	-0.262313
0.486071	1.79888	0.486091	-0.525713	0.486011	-0.263265
0.486903	1.79748	0.486923	-0.526856	0.486843	-0.26373
0.487735	1.79687	0.487755	-0.527152	0.487675	-0.263581
0.488567	1.79659	0.488587	-0.527992	0.488507	-0.263085
0.489399	1.79673	0.489419	-0.529234	0.489339	-0.263557
0.490231	1.79683	0.490251	-0.529913	0.49017	-0.263779
0.491063	1.79614	0.491083	-0.53011	0.491002	-0.263766
0.491895	1.79585	0.491915	-0.530168	0.491834	-0.26432
0.492727	1.79438	0.492747	-0.530967	0.492666	-0.265178
0.493559	1.79352	0.493579	-0.531935	0.493498	-0.266077
0.494391	1.79263	0.494411	-0.532724	0.49433	-0.266757
0.495223	1.79076	0.495243	-0.533656	0.495162	-0.267716
0.496055	1.78926	0.496076	-0.533979	0.495994	-0.268368
0.496887	1.78944	0.496908	-0.534108	0.496826	-0.269128
0.497719	1.78901	0.49774	-0.534907	0.497658	-0.270253
0.498551	1.78875	0.498572	-0.535723	0.49849	-0.270724
0.499383	1.78824	0.499404	-0.536986	0.499322	-0.271708
0.500216	1.78802	0.500236	-0.537811	0.500154	-0.272723
0.501047	1.78771	0.501068	-0.538849	0.500986	-0.273191
0.50188	1.7867	0.5019	-0.538885	0.501818	-0.273668
0.502712	1.78606	0.502732	-0.539065	0.50265	-0.273746
0.503543	1.7857	0.503564	-0.54002	0.503482	-0.273901
0.504376	1.78522	0.504396	-0.540493	0.504314	-0.274186
0.505208	1.7853	0.505228	-0.541186	0.505146	-0.274804
0.50604	1.78439	0.50606	-0.541608	0.505978	-0.27583
0.506872	1.78311	0.506892	-0.542438	0.50681	-0.276709
0.507704	1.78251	0.507724	-0.54282	0.507642	-0.277191
0.508536	1.78191	0.508556	-0.542269	0.508474	-0.277433
0.509368	1.78211	0.509388	-0.542739	0.509305	-0.277689
0.5102	1.78162	0.51022	-0.543776	0.510137	-0.278004
0.511032	1.78069	0.511052	-0.543548	0.510969	-0.278388
0.511864	1.7799	0.511884	-0.543595	0.511801	-0.278566
0.512696	1.77894	0.512716	-0.54432	0.512633	-0.279119
0.513528	1.77821	0.513548	-0.545355	0.513465	-0.280309
0.51436	1.77737	0.51438	-0.546837	0.514297	-0.280806
0.515192	1.77721	0.515212	-0.547218	0.515129	-0.280543
0.516024	1.77687	0.516044	-0.547313	0.515961	-0.280704
0.516856	1.77641	0.516876	-0.547574	0.516793	-0.28169
0.517688	1.77584	0.517708	-0.547596	0.517625	-0.281562
0.51852	1.77643	0.51854	-0.548376	0.518457	-0.281861
0.519352	1.77605	0.519372	-0.548748	0.519289	-0.283595
0.520184	1.77491	0.520204	-0.547988	0.520121	-0.284232
0.521016	1.77393	0.521036	-0.547852	0.520953	-0.284546
0.521848	1.77391	0.521868	-0.547932	0.521785	-0.28497
0.52268	1.77417	0.5227	-0.548211	0.522617	-0.285754
0.523512	1.77293	0.523532	-0.548042	0.523449	-0.286188
0.524344	1.77201	0.524364	-0.547838	0.524281	-0.286452
0.525176	1.77163	0.525196	-0.547657	0.525113	-0.286153
0.526008	1.77142	0.526028	-0.548126	0.525945	-0.286037
0.52684	1.77028	0.52686	-0.547667	0.526777	-0.286816
0.527672	1.76947	0.527692	-0.547592	0.527609	-0.287684
0.528504	1.76914	0.528524	-0.547598	0.528441	-0.2882
0.529336	1.76909	0.529356	-0.548687	0.529272	-0.288382
0.530168	1.76809	0.530188	-0.549061	0.530104	-0.288981
0.531	1.76668	0.53102	-0.549235	0.530936	-0.290728
0.531832	1.76505	0.531852	-0.54958	0.531768	-0.291701
0.532664	1.76511	0.532684	-0.550537	0.5326	-0.291578
0.533496	1.76479	0.533516	-0.551941	0.533432	-0.291977
0.534328	1.76386	0.534348	-0.551369	0.534264	-0.293347
0.53516	1.76393	0.53518	-0.552221	0.535096	-0.293539
0.535992	1.7643	0.536012	-0.55386	0.535928	-0.293437
0.536824	1.76442	0.536844	-0.555122	0.53676	-0.293876
0.537656	1.76507	0.537676	-0.555864	0.537592	-0.294871
0.538488	1.76477	0.538508	-0.556707	0.538424	-0.295644
0.53932	1.76352	0.53934	-0.556579	0.539256	-0.296393
0.540152	1.76252	0.540172	-0.556858	0.540088	-0.296488
0.540984	1.76237	0.541004	-0.557815	0.54092	-0.296019
0.541816	1.76191	0.541837	-0.558443	0.541752	-0.295994
0.542648	1.76157	0.542669	-0.559386	0.542584	-0.296339
0.54348	1.76137	0.543501	-0.560539	0.543416	-0.296598
0.544312	1.76071	0.544333	-0.560865	0.544248	-0.297083
0.545144	1.76067	0.545165	-0.561003	0.54508	-0.297143
0.545976	1.76045	0.545997	-0.561808	0.545912	-0.297266
0.546808	1.7587	0.546829	-0.562687	0.546744	-0.29775
0.54764	1.75743	0.547661	-0.562908	0.547576	-0.298662
0.548472	1.75723	0.548493	-0.562986	0.548407	-0.298722
0.549304	1.75652	0.549325	-0.563316	0.549239	-0.298103
0.550136	1.75641	0.550157	-0.564001	0.550071	-0.297757
0.550968	1.75524	0.550989	-0.5647	0.550903	-0.29778
0.5518	1.75503	0.551821	-0.565737	0.551735	-0.298099
0.552632	1.75448	0.552653	-0.566777	0.552567	-0.298376
0.553464	1.75365	0.553485	-0.567855	0.553399	-0.299107
0.554296	1.7536	0.554317	-0.568059	0.554231	-0.299395
0.555128	1.75308	0.555149	-0.5681	0.555063	-0.299698
0.55596	1.75202	0.555981	-0.567176	0.555895	-0.300209
0.556792	1.75157	0.556813	-0.56794	0.556727	-0.300385
0.557624	1.7508	0.557645	-0.568893	0.557559	-0.30066
0.558456	1.75116	0.558477	-0.569643	0.558391	-0.301204
0.559288	1.75103	0.559309	-0.570953	0.559223	-0.301932
0.56012	1.74955	0.560141	-0.570655	0.560055	-0.302104
0.560952	1.74988	0.560973	-0.570814	0.560887	-0.301732
0.561784	1.74921	0.561805	-0.572454	0.561719	-0.301152
0.562616	1.74938	0.562637	-0.574195	0.562551	-0.301292
0.563448	1.74936	0.563469	-0.574876	0.563383	-0.302434
0.56428	1.74806	0.564301	-0.57528	0.564215	-0.303164
0.565112	1.74756	0.565133	-0.576591	0.565047	-0.303485
0.565944	1.74737	0.565965	-0.577463	0.565879	-0.303856
0.566776	1.74764	0.566797	-0.577545	0.566711	-0.304228
0.567608	1.74629	0.567629	-0.578325	0.567543	-0.305326
0.56844	1.74665	0.568461	-0.580142	0.568375	-0.305501
0.569272	1.74667	0.569293	-0.581652	0.569206	-0.305209
0.570104	1.74544	0.570125	-0.582363	0.570038	-0.305467
0.570936	1.74433	0.570957	-0.582805	0.57087	-0.305882
0.571768	1.74403	0.571789	-0.583419	0.571702	-0.306574
0.5726	1.74349	0.572621	-0.584521	0.572534	-0.307021
0.573432	1.74419	0.573453	-0.585249	0.573366	-0.30684
0.574264	1.74371	0.574285	-0.585142	0.574198	-0.306993
0.575096	1.74342	0.575117	-0.585475	0.57503	-0.307426
0.575928	1.74331	0.575949	-0.587349	0.575862	-0.307195
0.57676	1.74291	0.576781	-0.586691	0.576694	-0.307262
0.577592	1.74209	0.577613	-0.585773	0.577526	-0.307447
0.578424	1.74134	0.578445	-0.58558	0.578358	-0.307372
0.579256	1.74073	0.579277	-0.586197	0.57919	-0.30754
0.580088	1.73982	0.580109	-0.586181	0.580022	-0.30788
0.58092	1.74005	0.580941	-0.587324	0.580854	-0.307738
0.581752	1.74033	0.581773	-0.587625	0.581686	-0.308069
0.582584	1.74038	0.582605	-0.587227	0.582518	-0.308882
0.583416	1.73993	0.583437	-0.586892	0.58335	-0.308876
0.584248	1.73956	0.584269	-0.586412	0.584182	-0.308836
0.58508	1.74021	0.585101	-0.586785	0.585014	-0.30938
0.585912	1.74014	0.585933	-0.587242	0.585846	-0.309725
0.586744	1.73885	0.586765	-0.58695	0.586678	-0.310495
0.587576	1.73879	0.587597	-0.58668	0.58751	-0.311649
0.588408	1.73919	0.58843	-0.58606	0.588341	-0.311982
0.58924	1.74015	0.589262	-0.585909	0.589173	-0.312385
0.590072	1.74045	0.590094	-0.586302	0.590005	-0.313424
0.590904	1.74076	0.590926	-0.587596	0.590837	-0.314305
0.591736	1.74051	0.591758	-0.587927	0.591669	-0.31469
0.592568	1.74004	0.59259	-0.588057	0.592501	-0.315048
0.5934	1.73905	0.593422	-0.58809	0.593333	-0.315749
0.594232	1.73858	0.594254	-0.588359	0.594165	-0.316848
0.595064	1.73817	0.595086	-0.589164	0.594997	-0.31684
0.595896	1.73765	0.595918	-0.590051	0.595829	-0.317523
0.596728	1.73714	0.59675	-0.590802	0.596661	-0.318393
0.59756	1.73711	0.597582	-0.591504	0.597493	-0.318737
0.598392	1.73687	0.598414	-0.59086	0.598325	-0.319408
0.599224	1.73638	0.599246	-0.590902	0.599157	-0.319671
0.600056	1.73534	0.600078	-0.590809	0.599989	-0.319302
0.600888	1.73529	0.60091	-0.59135	0.600821	-0.319377
0.60172	1.73545	0.601742	-0.5924	0.601653	-0.320503
0.602552	1.7355	0.602574	-0.594003	0.602485	-0.321527
0.603384	1.73636	0.603406	-0.593898	0.603317	-0.322686
0.604216	1.73641	0.604238	-0.593418	0.604149	-0.323523
0.605048	1.73633	0.60507	-0.594514	0.604981	-0.324106
0.60588	1.73619	0.605902	-0.59449	0.605813	-0.324811
0.606712	1.73597	0.606734	-0.594207	0.606645	-0.325369
0.607544	1.73588	0.607566	-0.594707	0.607477	-0.325292
0.608376	1.73594	0.608398	-0.594882	0.608308	-0.325636
0.609208	1.73597	0.60923	-0.594631	0.60914	-0.325418
0.61004	1.73554	0.610062	-0.594292	0.609972	-0.326494
0.610872	1.73581	0.610894	-0.593777	0.610804	-0.327164
0.611704	1.73599	0.611726	-0.593629	0.611636	-0.327579
0.612536	1.7352	0.612558	-0.593362	0.612468	-0.32793
0.613368	1.73428	0.61339	-0.594	0.6133	-0.327925
0.6142	1.73374	0.614222	-0.593994	0.614132	-0.327349
0.615032	1.73386	0.615054	-0.593775	0.614964	-0.327795
0.615864	1.73358	0.615886	-0.593916	0.615796	-0.328655
0.616696	1.7334	0.616718	-0.594367	0.616628	-0.329037
0.617528	1.73361	0.61755	-0.594642	0.61746	-0.329276
0.61836	1.73358	0.618382	-0.594935	0.618292	-0.329618
0.619192	1.73398	0.619214	-0.595564	0.619124	-0.329595
0.620024	1.73407	0.620046	-0.595431	0.619956	-0.32962
0.620856	1.7341	0.620878	-0.595941	0.620788	-0.330191
0.621688	1.73417	0.62171	-0.596642	0.62162	-0.330482
0.62252	1.73381	0.622542	-0.59773	0.622452	-0.330787
0.623352	1.73279	0.623374	-0.598692	0.623284	-0.330456
0.624184	1.7321	0.624206	-0.599897	0.624116	-0.33051
0.625016	1.73187	0.625038	-0.601388	0.624948	-0.331138
0.625848	1.73193	0.62587	-0.602219	0.62578	-0.331683
0.62668	1.73175	0.626702	-0.602527	0.626612	-0.331761
0.627512	1.73178	0.627534	-0.603605	0.627443	-0.331625
0.628344	1.73211	0.628366	-0.604744	0.628275	-0.331384
0.629176	1.73223	0.629198	-0.604788	0.629107	-0.331365
0.630008	1.73185	0.63003	-0.604741	0.629939	-0.33194
0.63084	1.73127	0.630862	-0.605261	0.630771	-0.331942
0.631672	1.73072	0.631694	-0.605545	0.631603	-0.331759
0.632504	1.73034	0.632526	-0.60522	0.632435	-0.331994
0.633336	1.73053	0.633358	-0.60568	0.633267	-0.33273
0.634168	1.73114	0.63419	-0.606351	0.634099	-0.333586
0.635	1.73165	0.635023	-0.606777	0.634931	-0.333988
0.635832	1.73226	0.635855	-0.606787	0.635763	-0.333382
0.636664	1.73227	0.636687	-0.606527	0.636595	-0.334217
0.637496	1.7324	0.637519	-0.606624	0.637427	-0.334603
0.638328	1.73235	0.638351	-0.606562	0.638259	-0.334832
0.63916	1.73166	0.639183	-0.606829	0.639091	-0.334846
0.639992	1.73118	0.640015	-0.607263	0.639923	-0.334329
0.640824	1.73092	0.640847	-0.60778	0.640755	-0.334261
0.641656	1.73087	0.641679	-0.608051	0.641587	-0.334273
0.642488	1.73069	0.642511	-0.607793	0.642419	-0.334969
0.64332	1.7304	0.643343	-0.60759	0.643251	-0.33381
0.644152	1.7301	0.644175	-0.607802	0.644083	-0.333631
0.644984	1.72891	0.645007	-0.608758	0.644915	-0.332919
0.645816	1.72787	0.645839	-0.609301	0.645747	-0.332779
0.646648	1.72677	0.646671	-0.609693	0.646579	-0.332547
0.64748	1.72655	0.647503	-0.610601	0.647411	-0.332884
0.648312	1.7264	0.648335	-0.611212	0.648242	-0.333255
0.649144	1.72602	0.649167	-0.612136	0.649074	-0.333961
0.649976	1.72571	0.649999	-0.613432	0.649906	-0.33445
0.650808	1.72531	0.650831	-0.614201	0.650738	-0.334068
0.65164	1.72563	0.651663	-0.614567	0.65157	-0.333837
0.652472	1.72569	0.652495	-0.615129	0.652402	-0.33465
0.653304	1.72521	0.653327	-0.615788	0.653234	-0.33461
0.654136	1.72563	0.654159	-0.616312	0.654066	-0.335385
0.654968	1.72627	0.654991	-0.616768	0.654898	-0.335784
0.6558	1.72551	0.655823	-0.617074	0.65573	-0.336812
0.656632	1.7243	0.656655	-0.617864	0.656562	-0.336885
0.657464	1.72457	0.657487	-0.618937	0.657394	-0.337168
0.658296	1.7248	0.658319	-0.619468	0.658226	-0.337116
0.659128	1.72507	0.659151	-0.620168	0.659058	-0.337187
0.65996	1.72418	0.659983	-0.620257	0.65989	-0.337729
0.660792	1.72463	0.660815	-0.6207	0.660722	-0.33823
0.661624	1.7233	0.661647	-0.621694	0.661554	-0.338787
0.662456	1.72362	0.662479	-0.621622	0.662386	-0.338346
0.663288	1.7236	0.663311	-0.621037	0.663218	-0.338765
0.66412	1.72287	0.664143	-0.620153	0.66405	-0.338373
0.664952	1.72362	0.664975	-0.619935	0.664882	-0.339361
0.665784	1.72381	0.665807	-0.620152	0.665714	-0.340008
0.666616	1.72372	0.666639	-0.620171	0.666546	-0.341398
0.667448	1.72276	0.667471	-0.620403	0.667378	-0.341483
0.66828	1.72248	0.668303	-0.620548	0.668209	-0.342314
0.669112	1.72256	0.669135	-0.620315	0.669041	-0.342959
0.669944	1.72107	0.669967	-0.620246	0.669873	-0.342688
0.670776	1.72026	0.670799	-0.621392	0.670705	-0.341066
0.671608	1.71969	0.671631	-0.622085	0.671537	-0.34086
0.67244	1.71951	0.672463	-0.621763	0.672369	-0.340663
0.673272	1.71928	0.673295	-0.622113	0.673201	-0.340742
0.674104	1.71809	0.674127	-0.622658	0.674033	-0.341199
0.674936	1.71768	0.674959	-0.622737	0.674865	-0.341574
0.675768	1.71654	0.675791	-0.622629	0.675697	-0.34203
0.6766	1.71626	0.676623	-0.621989	0.676529	-0.34276
0.677432	1.71633	0.677455	-0.62189	0.677361	-0.342999
0.678264	1.71656	0.678287	-0.622501	0.678193	-0.343064
0.679096	1.71571	0.679119	-0.62295	0.679025	-0.342804
0.679928	1.71632	0.679951	-0.622663	0.679857	-0.342473
0.68076	1.71694	0.680784	-0.623597	0.680689	-0.342629
0.681592	1.7174	0.681616	-0.624626	0.681521	-0.34314
0.682424	1.71686	0.682448	-0.624863	0.682353	-0.34419
0.683256	1.71638	0.68328	-0.625227	0.683185	-0.344452
0.684088	1.71621	0.684112	-0.625518	0.684017	-0.344961
0.68492	1.7163	0.684944	-0.625613	0.684849	-0.346119
0.685752	1.71459	0.685776	-0.62541	0.685681	-0.345913
0.686584	1.71467	0.686608	-0.625789	0.686513	-0.345915
0.687416	1.71466	0.68744	-0.625241	0.687344	-0.345932
0.688248	1.71543	0.688272	-0.625088	0.688176	-0.346455
0.68908	1.71523	0.689104	-0.625587	0.689008	-0.346345
0.689912	1.71451	0.689936	-0.625394	0.68984	-0.345955
0.690744	1.71483	0.690768	-0.625424	0.690672	-0.346346
0.691576	1.71426	0.6916	-0.624636	0.691504	-0.346998
0.692408	1.71378	0.692432	-0.624616	0.692336	-0.347802
0.69324	1.71301	0.693264	-0.625456	0.693168	-0.347558
0.694072	1.71239	0.694096	-0.625912	0.694	-0.347113
0.694904	1.71297	0.694928	-0.626551	0.694832	-0.347712
0.695736	1.71203	0.69576	-0.62653	0.695664	-0.34795
0.696568	1.71177	0.696592	-0.626835	0.696496	-0.348319
0.6974	1.71289	0.697424	-0.627675	0.697328	-0.34893
0.698232	1.71328	0.698256	-0.627437	0.69816	-0.349189
0.699064	1.71282	0.699088	-0.626944	0.698992	-0.34969
0.699896	1.71204	0.69992	-0.62671	0.699824	-0.350356
0.700728	1.71121	0.700752	-0.626815	0.700656	-0.351001
0.70156	1.71165	0.701584	-0.627643	0.701488	-0.352051
0.702392	1.71171	0.702416	-0.628169	0.70232	-0.353023
0.703224	1.71223	0.703248	-0.62895	0.703152	-0.353682
0.704056	1.71174	0.70408	-0.629989	0.703984	-0.35427
0.704888	1.71155	0.704912	-0.630646	0.704816	-0.355114
0.70572	1.71183	0.705744	-0.632409	0.705648	-0.355612
0.706552	1.711	0.706576	-0.632616	0.70648	-0.356047
0.707384	1.7105	0.707408	-0.632174	0.707312	-0.355859
0.708216	1.71109	0.70824	-0.632993	0.708143	-0.356142
0.709048	1.7108	0.709072	-0.634312	0.708975	-0.356444
0.70988	1.71065	0.709904	-0.635276	0.709807	-0.356515
0.710712	1.70996	0.710736	-0.635415	0.710639	-0.356684
0.711544	1.7102	0.711568	-0.636802	0.711471	-0.357761
0.712376	1.71033	0.7124	-0.635989	0.712303	-0.358688
0.713208	1.71035	0.713232	-0.636981	0.713135	-0.359234
0.71404	1.71021	0.714064	-0.637094	0.713967	-0.360408
0.714872	1.70965	0.714896	-0.636498	0.714799	-0.3615
0.715704	1.7101	0.715728	-0.635812	0.715631	-0.361726
0.716536	1.71044	0.71656	-0.636907	0.716463	-0.361495
0.717368	1.71085	0.717392	-0.637072	0.717295	-0.360508
0.7182	1.71143	0.718224	-0.63859	0.718127	-0.360386
0.719032	1.71131	0.719056	-0.638533	0.718959	-0.360912
0.719864	1.71124	0.719888	-0.638516	0.719791	-0.361274
0.720696	1.71154	0.72072	-0.639219	0.720623	-0.361873
0.721528	1.71155	0.721552	-0.640967	0.721455	-0.362844
0.72236	1.71145	0.722384	-0.641553	0.722287	-0.363933
0.723192	1.71108	0.723216	-0.641701	0.723119	-0.364321
0.724024	1.7109	0.724048	-0.642153	0.723951	-0.364456
0.724856	1.71172	0.72488	-0.642214	0.724783	-0.364916
0.725688	1.71289	0.725712	-0.642506	0.725615	-0.365107
0.72652	1.71252	0.726544	-0.643135	0.726447	-0.365606
0.727352	1.71186	0.727377	-0.643402	0.727278	-0.366636
0.728184	1.71213	0.728209	-0.643258	0.72811	-0.367915
0.729016	1.71253	0.729041	-0.64332	0.728942	-0.367847
0.729848	1.71239	0.729873	-0.644469	0.729774	-0.367209
0.73068	1.7125	0.730705	-0.6452	0.730606	-0.368434
0.731512	1.7116	0.731537	-0.645276	0.731438	-0.368962
0.732344	1.71281	0.732369	-0.645599	0.73227	-0.368609
0.733176	1.7126	0.733201	-0.64524	0.733102	-0.368403
0.734008	1.71305	0.734033	-0.645855	0.733934	-0.368158
0.73484	1.71317	0.734865	-0.645703	0.734766	-0.369674
0.735672	1.71344	0.735697	-0.645082	0.735598	-0.370077
0.736504	1.71415	0.736529	-0.644388	0.73643	-0.36962
0.737336	1.71368	0.737361	-0.644972	0.737262	-0.370057
0.738168	1.71466	0.738193	-0.64542	0.738094	-0.36946
0.739	1.71491	0.739025	-0.645104	0.738926	-0.370436
0.739832	1.71438	0.739857	-0.64512	0.739758	-0.371623
0.740664	1.71461	0.740689	-0.645643	0.74059	-0.371777
0.741496	1.71503	0.741521	-0.64598	0.741422	-0.372831
0.742328	1.71542	0.742353	-0.646602	0.742254	-0.373983
0.74316	1.7161	0.743185	-0.647417	0.743086	-0.374595
0.743992	1.71638	0.744017	-0.648017	0.743918	-0.374332
0.744824	1.71627	0.744849	-0.646886	0.74475	-0.373696
0.745656	1.71649	0.745681	-0.646052	0.745582	-0.374633
0.746488	1.71611	0.746513	-0.646209	0.746414	-0.376021
0.74732	1.7154	0.747345	-0.646473	0.747245	-0.376597
0.748152	1.71549	0.748177	-0.646603	0.748077	-0.376032
0.748984	1.71569	0.749009	-0.647047	0.748909	-0.376742
0.749816	1.71565	0.749841	-0.647666	0.749741	-0.375791
0.750648	1.71543	0.750673	-0.648193	0.750573	-0.376172
0.75148	1.71534	0.751505	-0.648243	0.751405	-0.375852
0.752312	1.71593	0.752337	-0.647909	0.752237	-0.375885
0.753144	1.71654	0.753169	-0.647769	0.753069	-0.376127
0.753976	1.71688	0.754001	-0.647542	0.753901	-0.377474
0.754808	1.71736	0.754833	-0.647459	0.754733	-0.378361
0.75564	1.71788	0.755665	-0.647831	0.755565	-0.377202
0.756472	1.71808	0.756497	-0.64814	0.756397	-0.377094
0.757304	1.71803	0.757329	-0.648636	0.757229	-0.377045
0.758136	1.71809	0.758161	-0.649466	0.758061	-0.377826
0.758968	1.71789	0.758993	-0.649976	0.758893	-0.378262
0.7598	1.71782	0.759825	-0.650188	0.759725	-0.377844
0.760632	1.71748	0.760657	-0.650511	0.760557	-0.377621
0.761464	1.71727	0.761489	-0.65013	0.761389	-0.377459
0.762296	1.7173	0.762321	-0.65051	0.762221	-0.377618
0.763128	1.71704	0.763153	-0.650536	0.763053	-0.376954
0.76396	1.71683	0.763985	-0.6504	0.763885	-0.377502
0.764792	1.71683	0.764817	-0.649992	0.764717	-0.378394
0.765624	1.71649	0.765649	-0.650027	0.765549	-0.379087
0.766456	1.7165	0.766481	-0.649929	0.76638	-0.379598
0.767288	1.71659	0.767313	-0.649497	0.767212	-0.380156
0.76812	1.71749	0.768145	-0.649622	0.768044	-0.380036
0.768952	1.71875	0.768977	-0.649675	0.768876	-0.38062
0.769784	1.71978	0.769809	-0.649693	0.769708	-0.380905
0.770616	1.72006	0.770641	-0.649762	0.77054	-0.381985
0.771448	1.71969	0.771473	-0.650178	0.771372	-0.382466
0.77228	1.71929	0.772305	-0.649859	0.772204	-0.381772
0.773112	1.71938	0.773138	-0.649084	0.773036	-0.381846
0.773944	1.71895	0.77397	-0.648736	0.773868	-0.382389
0.774776	1.71811	0.774801	-0.648395	0.7747	-0.382682
0.775608	1.71781	0.775634	-0.648324	0.775532	-0.383264
0.77644	1.71752	0.776466	-0.648174	0.776364	-0.38298
0.777272	1.71753	0.777298	-0.648921	0.777196	-0.383586
0.778104	1.71754	0.77813	-0.649449	0.778028	-0.383586
0.778936	1.71739	0.778962	-0.649851	0.77886	-0.383794
0.779768	1.71659	0.779794	-0.649469	0.779692	-0.385013
0.7806	1.71581	0.780626	-0.649591	0.780524	-0.385158
0.781432	1.71518	0.781458	-0.650033	0.781356	-0.384978
0.782264	1.71383	0.78229	-0.64998	0.782188	-0.384849
0.783096	1.71255	0.783122	-0.649976	0.78302	-0.384448
0.783928	1.71191	0.783954	-0.649818	0.783852	-0.384525
0.78476	1.71174	0.784786	-0.649105	0.784684	-0.384661
0.785592	1.71147	0.785618	-0.648374	0.785516	-0.384982
0.786424	1.71078	0.78645	-0.648402	0.786348	-0.386266
0.787256	1.71002	0.787282	-0.649093	0.787179	-0.387414
0.788088	1.71011	0.788114	-0.649144	0.788011	-0.38741
0.78892	1.71037	0.788946	-0.649307	0.788843	-0.387395
0.789752	1.70992	0.789778	-0.649664	0.789675	-0.388094
0.790584	1.70952	0.79061	-0.649119	0.790507	-0.389227
0.791416	1.70976	0.791442	-0.649133	0.791339	-0.389516
0.792248	1.70986	0.792274	-0.649536	0.792171	-0.3898
0.79308	1.70979	0.793106	-0.649128	0.793003	-0.390681
0.793912	1.7093	0.793938	-0.649203	0.793835	-0.392244
0.794744	1.70867	0.79477	-0.649992	0.794667	-0.393261
0.795576	1.70816	0.795602	-0.650421	0.795499	-0.393738
0.796408	1.70734	0.796434	-0.651239	0.796331	-0.392384
0.79724	1.70634	0.797266	-0.651848	0.797163	-0.391956
0.798072	1.70583	0.798098	-0.651898	0.797995	-0.392954
0.798904	1.70564	0.79893	-0.652356	0.798827	-0.393572
0.799736	1.70547	0.799762	-0.652774	0.799659	-0.39352
0.800568	1.70501	0.800594	-0.653141	0.800491	-0.39432
0.8014	1.70449	0.801426	-0.652582	0.801323	-0.395245
0.802232	1.7041	0.802258	-0.652374	0.802155	-0.395981
0.803064	1.70394	0.80309	-0.653122	0.802987	-0.396696
0.803896	1.70388	0.803922	-0.653698	0.803819	-0.397194
0.804728	1.70337	0.804754	-0.654091	0.804651	-0.397931
0.80556	1.70277	0.805586	-0.654734	0.805483	-0.399179
0.806392	1.70228	0.806418	-0.655713	0.806315	-0.399896
0.807224	1.70267	0.80725	-0.656176	0.807146	-0.400612
0.808056	1.70273	0.808082	-0.656455	0.807978	-0.40112
0.808888	1.7013	0.808914	-0.657714	0.80881	-0.401244
0.80972	1.69887	0.809746	-0.658662	0.809642	-0.400876
0.810552	1.69728	0.810578	-0.659652	0.810474	-0.401155
0.811384	1.69633	0.81141	-0.660804	0.811306	-0.401438
0.812216	1.69578	0.812242	-0.661768	0.812138	-0.401306
0.813048	1.69664	0.813074	-0.662233	0.81297	-0.401651
0.81388	1.69755	0.813906	-0.662291	0.813802	-0.402097
0.814712	1.69783	0.814738	-0.662636	0.814634	-0.402881
0.815544	1.69785	0.81557	-0.663494	0.815466	-0.404094
0.816376	1.69774	0.816402	-0.66436	0.816298	-0.404905
0.817208	1.69792	0.817234	-0.665108	0.81713	-0.405657
0.81804	1.69806	0.818066	-0.666139	0.817962	-0.406226
0.818872	1.69773	0.818898	-0.667096	0.818794	-0.406505
0.819704	1.6967	0.819731	-0.667696	0.819626	-0.406929
0.820536	1.69623	0.820562	-0.668114	0.820458	-0.40796
0.821368	1.69629	0.821395	-0.668504	0.82129	-0.408995
0.8222	1.69618	0.822227	-0.668616	0.822122	-0.409363
0.823032	1.69617	0.823059	-0.668417	0.822954	-0.409747
0.823864	1.69673	0.823891	-0.668698	0.823786	-0.409783
0.824696	1.69704	0.824723	-0.669377	0.824618	-0.410371
0.825528	1.69697	0.825555	-0.670515	0.82545	-0.410549
0.82636	1.69611	0.826387	-0.671505	0.826281	-0.410336
0.827192	1.69544	0.827219	-0.672614	0.827113	-0.409844
0.828024	1.69528	0.828051	-0.673359	0.827945	-0.410043
0.828856	1.69597	0.828883	-0.674084	0.828777	-0.410089
0.829688	1.69615	0.829715	-0.674653	0.829609	-0.409552
0.83052	1.69632	0.830547	-0.6747	0.830441	-0.408986
0.831352	1.69609	0.831379	-0.674935	0.831273	-0.408852
0.832184	1.69586	0.832211	-0.675039	0.832105	-0.408795
0.833016	1.6947	0.833043	-0.674287	0.832937	-0.408726
0.833848	1.69399	0.833875	-0.673563	0.833769	-0.409316
0.83468	1.6936	0.834707	-0.67385	0.834601	-0.409955
0.835512	1.6932	0.835539	-0.67424	0.835433	-0.409984
0.836344	1.69273	0.836371	-0.674354	0.836265	-0.409957
0.837176	1.69283	0.837203	-0.674595	0.837097	-0.409949
0.838008	1.69371	0.838035	-0.674841	0.837929	-0.410379
0.83884	1.69453	0.838867	-0.675264	0.838761	-0.41136
0.839672	1.69445	0.839699	-0.675496	0.839593	-0.41205
0.840504	1.69444	0.840531	-0.675416	0.840425	-0.412361
0.841336	1.69437	0.841363	-0.674982	0.841257	-0.412956
0.842168	1.69493	0.842195	-0.674855	0.842089	-0.413632
0.843	1.69497	0.843027	-0.675546	0.842921	-0.413402
0.843832	1.69553	0.843859	-0.676067	0.843753	-0.413364
0.844664	1.69544	0.844691	-0.675743	0.844585	-0.413157
0.845496	1.6948	0.845523	-0.67519	0.845417	-0.412505
0.846328	1.69508	0.846355	-0.675238	0.846249	-0.411899
0.84716	1.6951	0.847187	-0.674586	0.84708	-0.411621
0.847992	1.69549	0.848019	-0.673877	0.847912	-0.412049
0.848824	1.69528	0.848851	-0.673693	0.848744	-0.412093
0.849656	1.69447	0.849683	-0.673673	0.849576	-0.411579
0.850488	1.69454	0.850515	-0.673556	0.850408	-0.411624
0.85132	1.69469	0.851347	-0.673623	0.85124	-0.411898
0.852152	1.69467	0.852179	-0.673352	0.852072	-0.412265
0.852984	1.69461	0.853011	-0.67266	0.852904	-0.412405
0.853816	1.69472	0.853843	-0.672054	0.853736	-0.413146
0.854648	1.69397	0.854675	-0.672031	0.854568	-0.413899
0.85548	1.69233	0.855507	-0.67233	0.8554	-0.413614
0.856312	1.69145	0.856339	-0.672615	0.856232	-0.413343
0.857144	1.69147	0.857171	-0.672481	0.857064	-0.413437
0.857976	1.69093	0.858003	-0.672173	0.857896	-0.414372
0.858808	1.69003	0.858835	-0.671876	0.858728	-0.415102
0.85964	1.69002	0.859667	-0.670766	0.85956	-0.415935
0.860472	1.69018	0.860499	-0.670232	0.860392	-0.416523
0.861304	1.691	0.861331	-0.670657	0.861224	-0.416324
0.862136	1.69114	0.862163	-0.671226	0.862056	-0.415792
0.862968	1.6912	0.862995	-0.67162	0.862888	-0.415983
0.8638	1.69155	0.863827	-0.672053	0.86372	-0.416107
0.864632	1.69162	0.864659	-0.672253	0.864552	-0.416112
0.865464	1.69088	0.865492	-0.672451	0.865384	-0.416654
0.866296	1.69065	0.866323	-0.672526	0.866215	-0.416784
0.867128	1.69009	0.867155	-0.672241	0.867047	-0.417565
0.86796	1.69076	0.867988	-0.672145	0.867879	-0.418286
0.868792	1.69098	0.86882	-0.672388	0.868711	-0.418819
0.869624	1.69038	0.869652	-0.672611	0.869543	-0.419167
0.870456	1.68918	0.870484	-0.672316	0.870375	-0.419666
0.871288	1.68827	0.871316	-0.672651	0.871207	-0.420041
0.87212	1.68813	0.872148	-0.673125	0.872039	-0.420635
0.872952	1.68826	0.87298	-0.673489	0.872871	-0.42105
0.873784	1.68784	0.873812	-0.673574	0.873703	-0.42189
0.874616	1.6892	0.874644	-0.673778	0.874535	-0.422541
0.875448	1.68885	0.875476	-0.673693	0.875367	-0.422913
0.87628	1.68872	0.876308	-0.673598	0.876199	-0.423663
0.877112	1.6891	0.87714	-0.673754	0.877031	-0.424197
0.877944	1.68925	0.877972	-0.673747	0.877863	-0.42483
0.878776	1.68936	0.878804	-0.674188	0.878695	-0.425509
0.879608	1.68859	0.879636	-0.67432	0.879527	-0.42598
0.88044	1.68827	0.880468	-0.674537	0.880359	-0.42577
0.881272	1.68869	0.8813	-0.67548	0.881191	-0.425479
0.882104	1.68863	0.882132	-0.676074	0.882023	-0.42618
0.882936	1.6884	0.882964	-0.676665	0.882855	-0.426962
0.883768	1.68835	0.883796	-0.67696	0.883687	-0.427606
0.8846	1.68769	0.884628	-0.677402	0.884519	-0.428604
0.885432	1.68649	0.88546	-0.67769	0.885351	-0.429612
0.886264	1.6863	0.886292	-0.67883	0.886182	-0.430349
0.887096	1.68578	0.887124	-0.679324	0.887014	-0.431387
0.887928	1.68572	0.887956	-0.679852	0.887846	-0.432224
0.88876	1.68603	0.888788	-0.680363	0.888678	-0.432828
0.889592	1.68515	0.88962	-0.680935	0.88951	-0.433164
0.890424	1.68531	0.890452	-0.681661	0.890342	-0.43333
0.891256	1.68547	0.891284	-0.682146	0.891174	-0.433589
0.892088	1.68467	0.892116	-0.682402	0.892006	-0.434494
0.89292	1.68564	0.892948	-0.682354	0.892838	-0.435672
0.893752	1.68563	0.89378	-0.682745	0.89367	-0.436288
0.894584	1.68546	0.894612	-0.682931	0.894502	-0.437068
0.895416	1.68554	0.895444	-0.683604	0.895334	-0.437873
0.896248	1.68589	0.896276	-0.684316	0.896166	-0.438076
0.89708	1.6868	0.897108	-0.684762	0.896998	-0.438112
0.897912	1.68759	0.89794	-0.684947	0.89783	-0.43895
0.898744	1.68788	0.898772	-0.684762	0.898662	-0.439612
0.899576	1.68872	0.899604	-0.684597	0.899494	-0.439494
0.900408	1.68905	0.900436	-0.685714	0.900326	-0.439114
0.90124	1.68854	0.901268	-0.686667	0.901158	-0.438909
0.902072	1.68786	0.9021	-0.686642	0.90199	-0.439534
0.902904	1.68691	0.902932	-0.686239	0.902822	-0.440598
0.903736	1.68739	0.903764	-0.686052	0.903654	-0.44107
0.904568	1.68794	0.904596	-0.686301	0.904486	-0.44154
0.9054	1.68752	0.905428	-0.686218	0.905318	-0.442132
0.906232	1.68864	0.90626	-0.686559	0.906149	-0.442414
0.907064	1.68877	0.907092	-0.687401	0.906981	-0.443118
0.907896	1.68851	0.907924	-0.68684	0.907813	-0.44435
0.908728	1.68946	0.908756	-0.687216	0.908645	-0.445525
0.90956	1.68891	0.909588	-0.686993	0.909477	-0.44574
0.910392	1.6889	0.91042	-0.687219	0.910309	-0.44543
0.911224	1.68916	0.911252	-0.688	0.911141	-0.445403
0.912056	1.69015	0.912084	-0.687697	0.911973	-0.445744
0.912888	1.69044	0.912916	-0.686972	0.912805	-0.446487
0.91372	1.69036	0.913749	-0.687471	0.913637	-0.447055
0.914552	1.69051	0.914581	-0.687537	0.914469	-0.446966
0.915384	1.6908	0.915413	-0.68875	0.915301	-0.44647
0.916216	1.69058	0.916245	-0.689044	0.916133	-0.446449
0.917048	1.69107	0.917077	-0.689772	0.916965	-0.446791
0.91788	1.69106	0.917909	-0.689101	0.917797	-0.44602
0.918712	1.69096	0.918741	-0.688857	0.918629	-0.444894
0.919544	1.69182	0.919573	-0.688847	0.919461	-0.444513
0.920376	1.69223	0.920405	-0.68831	0.920293	-0.445035
0.921208	1.69169	0.921237	-0.688343	0.921125	-0.44489
0.92204	1.69129	0.922069	-0.68803	0.921957	-0.445651
0.922872	1.69108	0.922901	-0.6875	0.922789	-0.446619
0.923704	1.69115	0.923733	-0.686706	0.923621	-0.446771
0.924536	1.69132	0.924565	-0.685844	0.924453	-0.446614
0.925368	1.69087	0.925397	-0.686331	0.925285	-0.446243
0.9262	1.6916	0.926229	-0.686013	0.926116	-0.446058
0.927032	1.69275	0.927061	-0.686722	0.926948	-0.446879
0.927864	1.69307	0.927893	-0.687327	0.92778	-0.448225
0.928696	1.69391	0.928725	-0.687313	0.928612	-0.448861
0.929528	1.69437	0.929557	-0.686438	0.929444	-0.450021
0.93036	1.6938	0.930389	-0.686378	0.930276	-0.450191
0.931192	1.69371	0.931221	-0.68637	0.931108	-0.45018
0.932024	1.69306	0.932053	-0.686809	0.93194	-0.450979
0.932856	1.6931	0.932885	-0.686658	0.932772	-0.451917
0.933688	1.69338	0.933717	-0.686902	0.933604	-0.452072
0.93452	1.69318	0.934549	-0.685771	0.934436	-0.452543
0.935352	1.69307	0.935381	-0.685029	0.935268	-0.453009
0.936184	1.6931	0.936213	-0.685735	0.9361	-0.453176
0.937016	1.69271	0.937045	-0.685894	0.936932	-0.452442
0.937848	1.69211	0.937877	-0.685434	0.937764	-0.451829
0.93868	1.69156	0.938709	-0.685183	0.938596	-0.452478
0.939512	1.6908	0.939541	-0.68484	0.939428	-0.452969
0.940344	1.69095	0.940373	-0.685512	0.94026	-0.452922
0.941176	1.69114	0.941205	-0.685883	0.941092	-0.452996
0.942008	1.69124	0.942037	-0.685249	0.941924	-0.453372
0.94284	1.69152	0.942869	-0.684497	0.942756	-0.453095
0.943672	1.69168	0.943701	-0.684264	0.943588	-0.452559
0.944504	1.6918	0.944533	-0.684314	0.94442	-0.45243
0.945336	1.69188	0.945365	-0.684487	0.945252	-0.453071
0.946168	1.69218	0.946197	-0.683911	0.946083	-0.453344
0.947	1.69234	0.947029	-0.685151	0.946915	-0.453185
0.947832	1.69235	0.947861	-0.68561	0.947747	-0.453821
0.948664	1.69244	0.948693	-0.68551	0.948579	-0.453461
0.949496	1.69215	0.949525	-0.686874	0.949411	-0.452437
0.950328	1.69176	0.950357	-0.686555	0.950243	-0.450964
0.95116	1.69194	0.951189	-0.686328	0.951075	-0.451375
0.951992	1.69218	0.952021	-0.685663	0.951907	-0.452277
0.952824	1.69152	0.952853	-0.685103	0.952739	-0.452291
0.953656	1.69055	0.953685	-0.686206	0.953571	-0.452421
0.954488	1.69002	0.954517	-0.686696	0.954403	-0.451981
0.95532	1.68962	0.955349	-0.686089	0.955235	-0.452793
0.956152	1.68988	0.956181	-0.686308	0.956067	-0.45377
0.956984	1.69002	0.957013	-0.686564	0.956899	-0.45462
0.957816	1.68926	0.957845	-0.68725	0.957731	-0.454454
0.958648	1.68888	0.958677	-0.687653	0.958563	-0.453761
0.95948	1.68888	0.959509	-0.688576	0.959395	-0.454932
0.960312	1.68861	0.960342	-0.689094	0.960227	-0.456208
0.961144	1.68778	0.961174	-0.689269	0.961059	-0.456946
0.961976	1.68751	0.962006	-0.689422	0.961891	-0.456796
0.962808	1.68799	0.962838	-0.689516	0.962723	-0.458094
0.96364	1.68859	0.96367	-0.689533	0.963555	-0.458328
0.964472	1.6896	0.964502	-0.689386	0.964387	-0.458519
0.965304	1.68991	0.965334	-0.690045	0.965218	-0.45925
0.966136	1.68983	0.966166	-0.690857	0.96605	-0.460296
0.966968	1.68975	0.966998	-0.690581	0.966882	-0.460908
0.9678	1.68908	0.96783	-0.690327	0.967714	-0.461384
0.968632	1.68837	0.968662	-0.689935	0.968546	-0.461229
0.969464	1.68751	0.969494	-0.689872	0.969378	-0.460573
0.970296	1.68703	0.970326	-0.690297	0.97021	-0.461296
0.971128	1.68714	0.971158	-0.691041	0.971042	-0.461658
0.97196	1.68694	0.97199	-0.690734	0.971874	-0.461924
0.972792	1.68673	0.972822	-0.690581	0.972706	-0.461548
0.973624	1.68688	0.973654	-0.691005	0.973538	-0.461247
0.974456	1.68697	0.974486	-0.69154	0.97437	-0.461334
0.975288	1.68659	0.975318	-0.691927	0.975202	-0.461098
0.97612	1.6857	0.97615	-0.693283	0.976034	-0.461295
0.976952	1.6857	0.976982	-0.693797	0.976866	-0.46158
0.977784	1.68582	0.977814	-0.693579	0.977698	-0.461669
0.978616	1.68551	0.978646	-0.693456	0.97853	-0.462755
0.979448	1.68553	0.979478	-0.694152	0.979362	-0.464341
0.98028	1.68575	0.98031	-0.695221	0.980194	-0.464414
0.981112	1.68578	0.981142	-0.695785	0.981026	-0.464194
0.981944	1.68542	0.981974	-0.695775	0.981858	-0.464475
0.982776	1.68509	0.982806	-0.696023	0.98269	-0.464495
0.983608	1.68477	0.983638	-0.696331	0.983522	-0.464534
0.98444	1.68418	0.98447	-0.696756	0.984354	-0.465408
0.985272	1.68382	0.985302	-0.697168	0.985186	-0.465205
0.986104	1.68361	0.986134	-0.697647	0.986017	-0.466177
0.986936	1.68263	0.986966	-0.698422	0.986849	-0.466524
0.987768	1.68227	0.987798	-0.699425	0.987681	-0.465873
0.9886	1.68175	0.98863	-0.699563	0.988513	-0.466028
0.989432	1.68164	0.989462	-0.699498	0.989345	-0.466479
0.990264	1.68184	0.990294	-0.698974	0.990177	-0.46731
0.991096	1.68211	0.991126	-0.699041	0.991009	-0.467951
0.991928	1.68146	0.991958	-0.699836	0.991841	-0.469416
0.99276	1.68068	0.99279	-0.700749	0.992673	-0.469239
0.993592	1.68088	0.993622	-0.701606	0.993505	-0.469595
0.994424	1.68099	0.994454	-0.701995	0.994337	-0.470035
0.995256	1.68085	0.995286	-0.701613	0.995169	-0.47007
0.996088	1.68091	0.996118	-0.701274	0.996001	-0.471208
0.99692	1.68106	0.99695	-0.701354	0.996833	-0.471109
0.997752	1.68104	0.997782	-0.700908	0.997665	-0.471882
0.998584	1.6811	0.998614	-0.700985	0.998497	-0.471458
0.999416	1.68226	0.999446	-0.701696	0.999329	-0.47283
1.00025	1.68273	1.00028	-0.701622	1.00016	-0.474368
1.00108	1.68266	1.00111	-0.701136	1.00099	-0.475275
1.00191	1.68313	1.00194	-0.700863	1.00182	-0.475873
1.00274	1.68337	1.00277	-0.700782	1.00266	-0.475734
1.00358	1.68316	1.00361	-0.700722	1.00349	-0.476277
1.00441	1.68337	1.00444	-0.700474	1.00432	-0.475823
1.00524	1.68378	1.00527	-0.700636	1.00515	-0.475718
1.00607	1.6831	1.0061	-0.701561	1.00598	-0.476428
1.0069	1.68239	1.00693	-0.702157	1.00682	-0.476488
1.00774	1.68233	1.00777	-0.702264	1.00765	-0.475943
1.00857	1.68132	1.0086	-0.702242	1.00848	-0.476229
1.0094	1.68186	1.00943	-0.702943	1.00931	-0.4765
1.01023	1.68185	1.01026	-0.703137	1.01014	-0.477589
1.01106	1.68188	1.0111	-0.70324	1.01098	-0.478709
1.0119	1.68203	1.01193	-0.703282	1.01181	-0.478679
1.01273	1.6814	1.01276	-0.703592	1.01264	-0.478332
1.01356	1.68083	1.01359	-0.704343	1.01347	-0.479657
1.01439	1.68158	1.01442	-0.705314	1.0143	-0.481073
1.01522	1.68234	1.01526	-0.7046	1.01514	-0.481792
1.01606	1.68243	1.01609	-0.703798	1.01597	-0.481908
1.01689	1.68204	1.01692	-0.703385	1.0168	-0.482818
1.01772	1.6816	1.01775	-0.702909	1.01763	-0.4829
1.01855	1.68218	1.01858	-0.702366	1.01846	-0.482132
1.01938	1.68218	1.01941	-0.70284	1.0193	-0.482179
1.02022	1.68155	1.02025	-0.703748	1.02013	-0.482276
1.02105	1.68124	1.02108	-0.703886	1.02096	-0.482071
1.02188	1.68081	1.02191	-0.703598	1.02179	-0.482025
1.02271	1.68127	1.02274	-0.703251	1.02262	-0.482588
1.02354	1.68161	1.02357	-0.703392	1.02346	-0.483045
1.02438	1.68058	1.02441	-0.704068	1.02429	-0.483924
1.02521	1.68024	1.02524	-0.704566	1.02512	-0.485073
1.02604	1.67958	1.02607	-0.705033	1.02595	-0.485544
1.02687	1.67919	1.0269	-0.705371	1.02678	-0.486439
1.0277	1.67951	1.02774	-0.705988	1.02761	-0.486778
1.02854	1.67983	1.02857	-0.705877	1.02845	-0.486904
1.02937	1.6801	1.0294	-0.705922	1.02928	-0.487815
1.0302	1.68048	1.03023	-0.70591	1.03011	-0.488031
1.03103	1.67993	1.03106	-0.705881	1.03094	-0.487782
1.03186	1.67992	1.0319	-0.706043	1.03178	-0.488459
1.0327	1.67952	1.03273	-0.705987	1.03261	-0.489257
1.03353	1.6794	1.03356	-0.705951	1.03344	-0.489732
1.03436	1.67964	1.03439	-0.705683	1.03427	-0.490677
1.03519	1.68037	1.03522	-0.705637	1.0351	-0.491669
1.03602	1.68	1.03605	-0.705672	1.03594	-0.491913
1.03686	1.68037	1.03689	-0.705394	1.03677	-0.492241
1.03769	1.68049	1.03772	-0.705652	1.0376	-0.492654
1.03852	1.6811	1.03855	-0.706692	1.03843	-0.492687
1.03935	1.68151	1.03938	-0.707345	1.03926	-0.492556
1.04018	1.68111	1.04021	-0.707063	1.04009	-0.492049
1.04102	1.68108	1.04105	-0.70753	1.04093	-0.491651
1.04185	1.68091	1.04188	-0.707388	1.04176	-0.491981
1.04268	1.68001	1.04271	-0.706815	1.04259	-0.492637
1.04351	1.67942	1.04354	-0.707486	1.04342	-0.49285
1.04434	1.67848	1.04438	-0.707739	1.04425	-0.493274
1.04518	1.67814	1.04521	-0.708169	1.04509	-0.494135
1.04601	1.67806	1.04604	-0.708799	1.04592	-0.495982
1.04684	1.67758	1.04687	-0.709415	1.04675	-0.497435
1.04767	1.6766	1.0477	-0.710301	1.04758	-0.498053
1.0485	1.67577	1.04853	-0.710556	1.04841	-0.498581
1.04934	1.67689	1.04937	-0.711014	1.04925	-0.499239
1.05017	1.67658	1.0502	-0.710838	1.05008	-0.499366
1.051	1.67586	1.05103	-0.710784	1.05091	-0.498706
1.05183	1.67537	1.05186	-0.711404	1.05174	-0.497876
1.05266	1.67553	1.0527	-0.711341	1.05257	-0.497752
1.0535	1.67544	1.05353	-0.711072	1.05341	-0.497986
1.05433	1.67657	1.05436	-0.710718	1.05424	-0.498055
1.05516	1.67658	1.05519	-0.71031	1.05507	-0.498042
1.05599	1.67717	1.05602	-0.711006	1.0559	-0.497784
1.05682	1.67569	1.05686	-0.710503	1.05673	-0.496948
1.05766	1.67556	1.05769	-0.710902	1.05757	-0.495976
1.05849	1.67517	1.05852	-0.711537	1.0584	-0.495396
1.05932	1.67619	1.05935	-0.711547	1.05923	-0.496148
1.06015	1.67451	1.06018	-0.711919	1.06006	-0.497026
1.06098	1.67528	1.06102	-0.712126	1.06089	-0.497536
1.06182	1.67574	1.06185	-0.711385	1.06173	-0.498747
1.06265	1.67544	1.06268	-0.711105	1.06256	-0.500536
1.06348	1.67597	1.06351	-0.710935	1.06339	-0.50177
1.06431	1.67589	1.06434	-0.710359	1.06422	-0.502248
1.06514	1.6761	1.06518	-0.710808	1.06505	-0.502568
1.06598	1.6768	1.06601	-0.710225	1.06589	-0.502749
1.06681	1.67671	1.06684	-0.710051	1.06672	-0.503108
1.06764	1.67666	1.06767	-0.709747	1.06755	-0.503472
1.06847	1.677	1.0685	-0.710597	1.06838	-0.50367
1.0693	1.67714	1.06934	-0.710375	1.06921	-0.502685
1.07014	1.67749	1.07017	-0.71017	1.07004	-0.50286
1.07097	1.6771	1.071	-0.710745	1.07088	-0.502592
1.0718	1.67661	1.07183	-0.709578	1.07171	-0.503112
1.07263	1.67682	1.07266	-0.708986	1.07254	-0.50343
1.07346	1.67713	1.0735	-0.709403	1.07337	-0.503605
1.0743	1.67766	1.07433	-0.70999	1.07421	-0.503752
1.07513	1.67719	1.07516	-0.70985	1.07504	-0.504151
1.07596	1.67668	1.07599	-0.710375	1.07587	-0.504802
1.07679	1.67794	1.07682	-0.711019	1.0767	-0.504631
1.07762	1.67807	1.07766	-0.711531	1.07753	-0.505006
1.07846	1.67822	1.07849	-0.7117	1.07837	-0.505893
1.07929	1.67877	1.07932	-0.710961	1.0792	-0.505957
1.08012	1.67847	1.08015	-0.710772	1.08003	-0.506021
1.08095	1.67791	1.08098	-0.710149	1.08086	-0.506544
1.08178	1.6784	1.08182	-0.710828	1.08169	-0.507348
1.08262	1.67875	1.08265	-0.711396	1.08252	-0.508312
1.08345	1.6791	1.08348	-0.710608	1.08336	-0.508532
1.08428	1.67999	1.08431	-0.710441	1.08419	-0.508067
1.08511	1.68011	1.08514	-0.711162	1.08502	-0.50744
1.08594	1.68018	1.08598	-0.711226	1.08585	-0.507622
1.08678	1.68051	1.08681	-0.711058	1.08668	-0.50786
1.08761	1.68148	1.08764	-0.711124	1.08752	-0.508057
1.08844	1.6815	1.08847	-0.711076	1.08835	-0.507751
1.08927	1.68281	1.0893	-0.710763	1.08918	-0.50694
1.0901	1.68284	1.09014	-0.7101	1.09001	-0.505653
1.09094	1.68145	1.09097	-0.709907	1.09084	-0.505059
1.09177	1.68127	1.0918	-0.710017	1.09168	-0.505561
1.0926	1.68254	1.09263	-0.71044	1.09251	-0.505963
1.09343	1.68215	1.09346	-0.709869	1.09334	-0.506938
1.09427	1.68144	1.0943	-0.709993	1.09417	-0.507128
1.0951	1.68178	1.09513	-0.710377	1.095	-0.507574
1.09593	1.68108	1.09596	-0.711385	1.09584	-0.507558
1.09676	1.68096	1.09679	-0.711256	1.09667	-0.507879
1.09759	1.68053	1.09763	-0.710945	1.0975	-0.50735
1.09842	1.68067	1.09846	-0.711042	1.09833	-0.50739
1.09926	1.68103	1.09929	-0.710674	1.09916	-0.506748
1.10009	1.6817	1.10012	-0.71132	1.1	-0.508447
1.10092	1.68165	1.10095	-0.71223	1.10083	-0.509544
1.10175	1.683	1.10179	-0.712708	1.10166	-0.509606
1.10258	1.68294	1.10262	-0.713172	1.10249	-0.510229
1.10342	1.68205	1.10345	-0.713293	1.10332	-0.510213
1.10425	1.68218	1.10428	-0.713205	1.10416	-0.509858
1.10508	1.68214	1.10511	-0.714663	1.10499	-0.50955
1.10591	1.68194	1.10594	-0.715659	1.10582	-0.509095
1.10675	1.68111	1.10678	-0.715524	1.10665	-0.508664
1.10758	1.6815	1.10761	-0.716115	1.10748	-0.509592
1.10841	1.68132	1.10844	-0.716054	1.10831	-0.509679
1.10924	1.68126	1.10927	-0.715698	1.10915	-0.509187
1.11007	1.6807	1.1101	-0.715596	1.10998	-0.509121
1.11091	1.68047	1.11094	-0.715518	1.11081	-0.510051
1.11174	1.6799	1.11177	-0.715153	1.11164	-0.511606
1.11257	1.68026	1.1126	-0.714715	1.11248	-0.512232
1.1134	1.68026	1.11343	-0.714484	1.11331	-0.513087
1.11423	1.67963	1.11427	-0.715166	1.11414	-0.514188
1.11506	1.67816	1.1151	-0.713612	1.11497	-0.513929
1.1159	1.6775	1.11593	-0.713499	1.1158	-0.514605
1.11673	1.67833	1.11676	-0.713411	1.11664	-0.514282
1.11756	1.67843	1.11759	-0.712843	1.11747	-0.515067
1.11839	1.67771	1.11843	-0.712751	1.1183	-0.514553
1.11922	1.67815	1.11926	-0.711712	1.11913	-0.515177
1.12006	1.67731	1.12009	-0.711927	1.11996	-0.514695
1.12089	1.67723	1.12092	-0.71314	1.12079	-0.514629
1.12172	1.67724	1.12175	-0.712969	1.12163	-0.515276
1.12255	1.67717	1.12258	-0.713825	1.12246	-0.515151
1.12339	1.67669	1.12342	-0.713483	1.12329	-0.515437
1.12422	1.67629	1.12425	-0.713603	1.12412	-0.515842
1.12505	1.6753	1.12508	-0.714138	1.12495	-0.516641
1.12588	1.67503	1.12591	-0.714359	1.12579	-0.517809
1.12671	1.67545	1.12675	-0.713397	1.12662	-0.518414
1.12755	1.67594	1.12758	-0.714266	1.12745	-0.518307
1.12838	1.67545	1.12841	-0.714963	1.12828	-0.519069
1.12921	1.67436	1.12924	-0.714582	1.12911	-0.519024
1.13004	1.67436	1.13007	-0.714999	1.12995	-0.518958
1.13087	1.67342	1.13091	-0.716014	1.13078	-0.518952
1.1317	1.67314	1.13174	-0.71634	1.13161	-0.519465
1.13254	1.67351	1.13257	-0.716233	1.13244	-0.52082
1.13337	1.67441	1.1334	-0.715975	1.13327	-0.521194
1.1342	1.67505	1.13423	-0.716182	1.13411	-0.521461
1.13503	1.67557	1.13506	-0.716372	1.13494	-0.521267
1.13586	1.67612	1.1359	-0.716702	1.13577	-0.521862
1.1367	1.67533	1.13673	-0.716571	1.1366	-0.523
1.13753	1.67468	1.13756	-0.716338	1.13743	-0.523333
1.13836	1.67509	1.13839	-0.716963	1.13827	-0.524469
1.13919	1.67522	1.13922	-0.717001	1.1391	-0.525218
1.14003	1.67553	1.14006	-0.717114	1.13993	-0.525527
1.14086	1.67549	1.14089	-0.718101	1.14076	-0.526295
1.14169	1.67508	1.14172	-0.717207	1.14159	-0.526331
1.14252	1.676	1.14255	-0.717443	1.14243	-0.525838
1.14335	1.6759	1.14339	-0.717585	1.14326	-0.526382
1.14419	1.67546	1.14422	-0.718016	1.14409	-0.526641
1.14502	1.6756	1.14505	-0.718242	1.14492	-0.527256
1.14585	1.67526	1.14588	-0.717777	1.14575	-0.52796
1.14668	1.67519	1.14671	-0.716642	1.14658	-0.527235
1.14751	1.67581	1.14755	-0.716348	1.14742	-0.526865
1.14834	1.67607	1.14838	-0.717136	1.14825	-0.527307
1.14918	1.67586	1.14921	-0.71804	1.14908	-0.527087
1.15001	1.676	1.15004	-0.718091	1.14991	-0.52726
1.15084	1.67601	1.15087	-0.719346	1.15074	-0.526749
1.15167	1.67643	1.15171	-0.719173	1.15158	-0.526581
1.1525	1.6768	1.15254	-0.719477	1.15241	-0.525847
1.15334	1.67704	1.15337	-0.719786	1.15324	-0.525918
1.15417	1.67705	1.1542	-0.72046	1.15407	-0.525533
1.155	1.67747	1.15503	-0.720909	1.15491	-0.525892
1.15583	1.67863	1.15587	-0.720287	1.15574	-0.525795
1.15667	1.68021	1.1567	-0.720615	1.15657	-0.526984
1.1575	1.68084	1.15753	-0.720485	1.1574	-0.526184
1.15833	1.68155	1.15836	-0.722047	1.15823	-0.527027
1.15916	1.68189	1.15919	-0.721756	1.15907	-0.526253
1.15999	1.68167	1.16003	-0.721702	1.1599	-0.526809
1.16082	1.68126	1.16086	-0.72215	1.16073	-0.525674
1.16166	1.68113	1.16169	-0.721705	1.16156	-0.526423
1.16249	1.68089	1.16252	-0.72066	1.16239	-0.527037
1.16332	1.68087	1.16335	-0.720725	1.16322	-0.527311
1.16415	1.68132	1.16419	-0.720906	1.16406	-0.52802
1.16498	1.68134	1.16502	-0.721137	1.16489	-0.528164
1.16582	1.6808	1.16585	-0.721308	1.16572	-0.527679
1.16665	1.6805	1.16668	-0.72056	1.16655	-0.52739
1.16748	1.68089	1.16751	-0.720457	1.16738	-0.527589
1.16831	1.68075	1.16835	-0.720842	1.16822	-0.527794
1.16915	1.6803	1.16918	-0.720189	1.16905	-0.527918
1.16998	1.68057	1.17001	-0.719912	1.16988	-0.527238
1.17081	1.68076	1.17084	-0.720002	1.17071	-0.527945
1.17164	1.68039	1.17167	-0.719796	1.17154	-0.528919
1.17247	1.6805	1.17251	-0.720104	1.17238	-0.530158
1.17331	1.68119	1.17334	-0.720259	1.17321	-0.529687
1.17414	1.68142	1.17417	-0.720813	1.17404	-0.529031
1.17497	1.68117	1.175	-0.720804	1.17487	-0.52796
1.1758	1.6805	1.17583	-0.72029	1.1757	-0.528423
1.17663	1.68031	1.17667	-0.720363	1.17654	-0.528689
1.17746	1.68057	1.1775	-0.720294	1.17737	-0.529443
1.1783	1.68118	1.17833	-0.719899	1.1782	-0.528415
1.17913	1.68149	1.17916	-0.719251	1.17903	-0.529617
1.17996	1.68124	1.17999	-0.719337	1.17986	-0.529091
1.18079	1.6807	1.18083	-0.718903	1.1807	-0.529099
1.18162	1.68036	1.18166	-0.71942	1.18153	-0.528025
1.18246	1.68081	1.18249	-0.720223	1.18236	-0.528211
1.18329	1.68009	1.18332	-0.720689	1.18319	-0.528532
1.18412	1.67858	1.18415	-0.720866	1.18402	-0.530038
1.18495	1.6782	1.18499	-0.720589	1.18485	-0.530332
1.18579	1.67854	1.18582	-0.720273	1.18569	-0.530607
1.18662	1.6787	1.18665	-0.720216	1.18652	-0.531112
1.18745	1.67892	1.18748	-0.721155	1.18735	-0.530683
1.18828	1.67886	1.18831	-0.721964	1.18818	-0.53092
1.18911	1.67796	1.18915	-0.721977	1.18901	-0.531374
1.18995	1.67758	1.18998	-0.721084	1.18985	-0.531828
1.19078	1.67798	1.19081	-0.720519	1.19068	-0.530514
1.19161	1.67825	1.19164	-0.720619	1.19151	-0.530841
1.19244	1.67875	1.19247	-0.720262	1.19234	-0.531817
1.19327	1.67886	1.19331	-0.720405	1.19318	-0.533118
1.1941	1.67842	1.19414	-0.7213	1.19401	-0.533639
1.19494	1.67777	1.19497	-0.721398	1.19484	-0.533735
1.19577	1.67732	1.1958	-0.721176	1.19567	-0.535132
1.1966	1.67673	1.19663	-0.721079	1.1965	-0.535321
1.19743	1.67616	1.19747	-0.72139	1.19734	-0.53487
1.19826	1.67551	1.1983	-0.721872	1.19817	-0.535823
1.1991	1.6745	1.19913	-0.721585	1.199	-0.536551
1.19993	1.6735	1.19996	-0.720791	1.19983	-0.536881
1.20076	1.67344	1.2008	-0.721039	1.20066	-0.537278
1.20159	1.67392	1.20163	-0.721298	1.20149	-0.537452
1.20243	1.67426	1.20246	-0.721395	1.20233	-0.53835
1.20326	1.67436	1.20329	-0.722438	1.20316	-0.538976
1.20409	1.67445	1.20412	-0.723542	1.20399	-0.538861
1.20492	1.67458	1.20495	-0.72423	1.20482	-0.538817
1.20575	1.67448	1.20579	-0.724116	1.20565	-0.539045
1.20659	1.67411	1.20662	-0.723828	1.20649	-0.539289
1.20742	1.67412	1.20745	-0.723972	1.20732	-0.539989
1.20825	1.6735	1.20828	-0.725191	1.20815	-0.54072
1.20908	1.67324	1.20911	-0.725438	1.20898	-0.539894
1.20991	1.67347	1.20995	-0.725045	1.20981	-0.540064
1.21074	1.67325	1.21078	-0.725292	1.21065	-0.540365
1.21158	1.67311	1.21161	-0.725579	1.21148	-0.540953
1.21241	1.67262	1.21244	-0.725738	1.21231	-0.540521
1.21324	1.67279	1.21328	-0.725142	1.21314	-0.539561
1.21407	1.67281	1.21411	-0.724845	1.21397	-0.538872
1.2149	1.67247	1.21494	-0.725173	1.21481	-0.539899
1.21574	1.67163	1.21577	-0.725276	1.21564	-0.541177
1.21657	1.67117	1.2166	-0.72583	1.21647	-0.542111
1.2174	1.671	1.21744	-0.7263	1.2173	-0.542131
1.21823	1.67065	1.21827	-0.726241	1.21813	-0.542484
1.21907	1.67063	1.2191	-0.726614	1.21897	-0.541622
1.2199	1.67029	1.21993	-0.727416	1.2198	-0.54208
1.22073	1.67077	1.22076	-0.727783	1.22063	-0.541148
1.22156	1.67083	1.22159	-0.72832	1.22146	-0.541406
1.22239	1.67166	1.22243	-0.728946	1.22229	-0.542321
1.22323	1.67159	1.22326	-0.728578	1.22313	-0.543727
1.22406	1.67116	1.22409	-0.728114	1.22396	-0.544776
1.22489	1.67175	1.22492	-0.727722	1.22479	-0.544666
1.22572	1.6729	1.22575	-0.727147	1.22562	-0.544446
1.22655	1.67351	1.22659	-0.727292	1.22645	-0.545046
1.22738	1.67406	1.22742	-0.727718	1.22728	-0.544589
1.22822	1.67527	1.22825	-0.728163	1.22812	-0.543988
1.22905	1.67548	1.22908	-0.728488	1.22895	-0.544627
1.22988	1.67554	1.22992	-0.728599	1.22978	-0.545185
1.23071	1.67568	1.23075	-0.729152	1.23061	-0.545899
1.23154	1.67477	1.23158	-0.729843	1.23144	-0.545497
1.23238	1.67366	1.23241	-0.730161	1.23228	-0.546552
1.23321	1.67368	1.23324	-0.730519	1.23311	-0.547099
1.23404	1.67326	1.23408	-0.731205	1.23394	-0.54739
1.23487	1.67352	1.23491	-0.730892	1.23477	-0.546378
1.23571	1.67416	1.23574	-0.730849	1.23561	-0.547231
1.23654	1.67457	1.23657	-0.731637	1.23644	-0.54763
1.23737	1.67454	1.2374	-0.732787	1.23727	-0.547835
1.2382	1.67527	1.23824	-0.733582	1.2381	-0.548181
1.23903	1.67493	1.23907	-0.734311	1.23893	-0.548494
1.23986	1.67509	1.2399	-0.734899	1.23977	-0.54769
1.2407	1.67492	1.24073	-0.735275	1.2406	-0.547498
1.24153	1.67493	1.24156	-0.73549	1.24143	-0.546873
1.24236	1.67501	1.2424	-0.734835	1.24226	-0.54779
1.24319	1.67445	1.24323	-0.734693	1.24309	-0.547928
1.24402	1.67427	1.24406	-0.73472	1.24392	-0.547301
1.24486	1.67502	1.24489	-0.733808	1.24476	-0.546402
1.24569	1.6744	1.24572	-0.732725	1.24559	-0.546497
1.24652	1.67405	1.24656	-0.732263	1.24642	-0.547051
1.24735	1.67321	1.24739	-0.732187	1.24725	-0.547179
1.24819	1.67309	1.24822	-0.732445	1.24808	-0.547335
1.24902	1.6725	1.24905	-0.732183	1.24892	-0.547562
1.24985	1.67305	1.24988	-0.731786	1.24975	-0.547959
1.25068	1.67139	1.25072	-0.732242	1.25058	-0.548204
1.25151	1.67078	1.25155	-0.732598	1.25141	-0.549393
1.25235	1.67115	1.25238	-0.73306	1.25224	-0.549638
1.25318	1.67097	1.25321	-0.733114	1.25308	-0.549396
1.25401	1.67118	1.25404	-0.733098	1.25391	-0.549054
1.25484	1.67113	1.25488	-0.733506	1.25474	-0.548996
1.25567	1.67078	1.25571	-0.733158	1.25557	-0.549579
1.2565	1.67047	1.25654	-0.732178	1.2564	-0.549958
1.25734	1.66977	1.25737	-0.732108	1.25724	-0.548923
1.25817	1.6705	1.2582	-0.731466	1.25807	-0.548299
1.259	1.67099	1.25904	-0.731203	1.2589	-0.547804
1.25983	1.67093	1.25987	-0.731233	1.25973	-0.547341
1.26066	1.67094	1.2607	-0.731346	1.26056	-0.547794
1.2615	1.67127	1.26153	-0.732562	1.2614	-0.547772
1.26233	1.67077	1.26236	-0.732512	1.26223	-0.548607
1.26316	1.67015	1.2632	-0.732956	1.26306	-0.548869
1.26399	1.67063	1.26403	-0.732772	1.26389	-0.548437
1.26483	1.67008	1.26486	-0.733177	1.26472	-0.548505
1.26566	1.66979	1.26569	-0.733408	1.26555	-0.548386
1.26649	1.66939	1.26652	-0.734045	1.26639	-0.548554
1.26732	1.66816	1.26736	-0.734186	1.26722	-0.548452
1.26815	1.66769	1.26819	-0.733221	1.26805	-0.548473
1.26899	1.66684	1.26902	-0.73303	1.26888	-0.548731
1.26982	1.66728	1.26985	-0.732873	1.26971	-0.549105
1.27065	1.66718	1.27068	-0.733191	1.27055	-0.548944
1.27148	1.66678	1.27152	-0.733113	1.27138	-0.549106
1.27231	1.6669	1.27235	-0.732252	1.27221	-0.549409
1.27314	1.66725	1.27318	-0.732179	1.27304	-0.550348
1.27398	1.66769	1.27401	-0.732327	1.27388	-0.550608
1.27481	1.66777	1.27484	-0.731673	1.27471	-0.550417
1.27564	1.66804	1.27568	-0.731568	1.27554	-0.550838
1.27647	1.66824	1.27651	-0.731618	1.27637	-0.551133
1.2773	1.6681	1.27734	-0.730863	1.2772	-0.55001
1.27814	1.66786	1.27817	-0.730935	1.27804	-0.549149
1.27897	1.66806	1.279	-0.730686	1.27887	-0.548665
1.2798	1.66827	1.27984	-0.730546	1.2797	-0.548136
1.28063	1.66848	1.28067	-0.730184	1.28053	-0.548501
1.28147	1.66841	1.2815	-0.730343	1.28136	-0.548778
1.2823	1.66912	1.28233	-0.730881	1.28219	-0.549375
1.28313	1.66967	1.28316	-0.731148	1.28303	-0.549484
1.28396	1.66904	1.284	-0.731315	1.28386	-0.549315
1.28479	1.66931	1.28483	-0.731753	1.28469	-0.549351
1.28563	1.66933	1.28566	-0.732569	1.28552	-0.549862
1.28646	1.66873	1.28649	-0.734144	1.28635	-0.550688
1.28729	1.66887	1.28733	-0.734596	1.28719	-0.550568
1.28812	1.66907	1.28816	-0.733729	1.28802	-0.549745
1.28895	1.66956	1.28899	-0.734061	1.28885	-0.549566
1.28978	1.67022	1.28982	-0.734268	1.28968	-0.549943
1.29062	1.67094	1.29065	-0.734409	1.29051	-0.550405
1.29145	1.67127	1.29148	-0.734041	1.29135	-0.551029
1.29228	1.67133	1.29232	-0.733933	1.29218	-0.551119
1.29311	1.67204	1.29315	-0.733752	1.29301	-0.550866
1.29394	1.67212	1.29398	-0.733782	1.29384	-0.551031
1.29478	1.67247	1.29481	-0.734031	1.29467	-0.551361
1.29561	1.67252	1.29564	-0.734831	1.29551	-0.552294
1.29644	1.67224	1.29648	-0.735523	1.29634	-0.552873
1.29727	1.672	1.29731	-0.735486	1.29717	-0.552352
1.29811	1.67255	1.29814	-0.735724	1.298	-0.552501
1.29894	1.67275	1.29897	-0.736561	1.29883	-0.55366
1.29977	1.67289	1.29981	-0.737207	1.29967	-0.554293
1.3006	1.67233	1.30064	-0.738009	1.3005	-0.554351
1.30143	1.67301	1.30147	-0.738398	1.30133	-0.554871
1.30227	1.67276	1.3023	-0.73821	1.30216	-0.555021
1.3031	1.67268	1.30313	-0.738484	1.30299	-0.5547
1.30393	1.67208	1.30397	-0.738125	1.30383	-0.554226
1.30476	1.67216	1.3048	-0.738252	1.30466	-0.554527
1.30559	1.67242	1.30563	-0.737875	1.30549	-0.555077
1.30642	1.67162	1.30646	-0.738639	1.30632	-0.555344
1.30726	1.67129	1.30729	-0.738445	1.30715	-0.5555
1.30809	1.67136	1.30812	-0.738763	1.30798	-0.555801
1.30892	1.67115	1.30896	-0.738681	1.30882	-0.555813
1.30975	1.67135	1.30979	-0.739614	1.30965	-0.555533
1.31059	1.6709	1.31062	-0.740679	1.31048	-0.555475
1.31142	1.67083	1.31145	-0.74126	1.31131	-0.555566
1.31225	1.67004	1.31228	-0.741308	1.31214	-0.555511
1.31308	1.66927	1.31312	-0.741109	1.31298	-0.55507
1.31391	1.66965	1.31395	-0.741393	1.31381	-0.554448
1.31475	1.67043	1.31478	-0.741951	1.31464	-0.55445
1.31558	1.6707	1.31561	-0.742226	1.31547	-0.554883
1.31641	1.67069	1.31645	-0.742811	1.31631	-0.555509
1.31724	1.67051	1.31728	-0.743434	1.31714	-0.555427
1.31807	1.67	1.31811	-0.7437	1.31797	-0.55529
1.3189	1.66941	1.31894	-0.743735	1.3188	-0.555246
1.31974	1.66928	1.31977	-0.744045	1.31963	-0.554913
1.32057	1.66963	1.32061	-0.744259	1.32046	-0.555673
1.3214	1.66951	1.32144	-0.744103	1.3213	-0.555191
1.32223	1.66894	1.32227	-0.744152	1.32213	-0.554434
1.32306	1.66836	1.3231	-0.744169	1.32296	-0.554463
1.3239	1.6686	1.32393	-0.744078	1.32379	-0.554454
1.32473	1.66859	1.32476	-0.744416	1.32462	-0.554557
1.32556	1.66817	1.3256	-0.744804	1.32546	-0.554351
1.32639	1.66818	1.32643	-0.74522	1.32629	-0.555099
1.32723	1.66817	1.32726	-0.745852	1.32712	-0.554534
1.32806	1.66826	1.32809	-0.745945	1.32795	-0.554823
1.32889	1.66832	1.32892	-0.745462	1.32878	-0.555881
1.32972	1.66841	1.32976	-0.74555	1.32962	-0.555812
1.33055	1.66834	1.33059	-0.746828	1.33045	-0.554955
1.33139	1.66795	1.33142	-0.748094	1.33128	-0.554323
1.33222	1.66778	1.33225	-0.747975	1.33211	-0.552831
1.33305	1.6678	1.33309	-0.748091	1.33294	-0.552353
1.33388	1.66799	1.33392	-0.748829	1.33378	-0.552286
1.33471	1.66816	1.33475	-0.74934	1.33461	-0.552398
1.33554	1.66812	1.33558	-0.749469	1.33544	-0.552557
1.33638	1.66791	1.33641	-0.749922	1.33627	-0.552165
1.33721	1.66745	1.33725	-0.749842	1.3371	-0.551983
1.33804	1.66797	1.33808	-0.749641	1.33794	-0.551816
1.33887	1.66944	1.33891	-0.749616	1.33877	-0.552806
1.3397	1.66998	1.33974	-0.749874	1.3396	-0.552556
1.34054	1.66999	1.34057	-0.750605	1.34043	-0.552765
1.34137	1.67024	1.34141	-0.750739	1.34126	-0.553036
1.3422	1.67025	1.34224	-0.750326	1.3421	-0.553786
1.34303	1.66927	1.34307	-0.750582	1.34293	-0.553749
1.34387	1.66851	1.3439	-0.751366	1.34376	-0.55383
1.3447	1.66866	1.34473	-0.751537	1.34459	-0.5534
1.34553	1.66895	1.34557	-0.751111	1.34542	-0.55367
1.34636	1.66922	1.3464	-0.751224	1.34625	-0.553051
1.34719	1.66963	1.34723	-0.75162	1.34709	-0.552781
1.34803	1.66998	1.34806	-0.751345	1.34792	-0.552625
1.34886	1.67	1.34889	-0.750599	1.34875	-0.553033
1.34969	1.67001	1.34973	-0.750156	1.34958	-0.553394
1.35052	1.67029	1.35056	-0.749962	1.35041	-0.553012
1.35135	1.67042	1.35139	-0.749385	1.35125	-0.553138
1.35218	1.67041	1.35222	-0.748734	1.35208	-0.553719
1.35302	1.67077	1.35305	-0.748754	1.35291	-0.554024
1.35385	1.67123	1.35389	-0.748757	1.35374	-0.55399
1.35468	1.67168	1.35472	-0.748374	1.35458	-0.554049
1.35551	1.67156	1.35555	-0.748459	1.35541	-0.554346
1.35634	1.67108	1.35638	-0.748684	1.35624	-0.553994
1.35718	1.67095	1.35721	-0.749133	1.35707	-0.553646
1.35801	1.67106	1.35805	-0.74926	1.3579	-0.55334
1.35884	1.67118	1.35888	-0.749373	1.35874	-0.553286
1.35967	1.67064	1.35971	-0.749865	1.35957	-0.554333
1.36051	1.6701	1.36054	-0.749804	1.3604	-0.55507
1.36134	1.66983	1.36137	-0.750532	1.36123	-0.556437
1.36217	1.67009	1.36221	-0.750856	1.36206	-0.555849
1.363	1.67057	1.36304	-0.751126	1.36289	-0.556355
1.36383	1.67057	1.36387	-0.751337	1.36373	-0.557875
1.36467	1.67047	1.3647	-0.751272	1.36456	-0.559081
1.3655	1.67033	1.36553	-0.751707	1.36539	-0.559403
1.36633	1.66995	1.36637	-0.751926	1.36622	-0.559596
1.36716	1.66937	1.3672	-0.752304	1.36705	-0.559268
1.36799	1.66935	1.36803	-0.752419	1.36789	-0.559467
1.36882	1.6696	1.36886	-0.751712	1.36872	-0.559481
1.36966	1.66993	1.36969	-0.751713	1.36955	-0.560222
1.37049	1.67026	1.37053	-0.751655	1.37038	-0.560439
1.37132	1.66963	1.37136	-0.751238	1.37121	-0.560529
1.37215	1.66929	1.37219	-0.751018	1.37205	-0.561328
1.37298	1.66961	1.37302	-0.750846	1.37288	-0.561993
1.37382	1.67018	1.37386	-0.751114	1.37371	-0.562002
1.37465	1.67055	1.37469	-0.751323	1.37454	-0.562364
1.37548	1.67098	1.37552	-0.751191	1.37537	-0.562986
1.37631	1.67145	1.37635	-0.751603	1.37621	-0.562645
1.37715	1.67153	1.37718	-0.752362	1.37704	-0.562084
1.37798	1.6716	1.37801	-0.752609	1.37787	-0.561875
1.37881	1.67164	1.37885	-0.753049	1.3787	-0.562081
1.37964	1.67087	1.37968	-0.753243	1.37953	-0.562833
1.38047	1.66966	1.38051	-0.753568	1.38037	-0.562703
1.38131	1.66907	1.38134	-0.754519	1.3812	-0.562217
1.38214	1.66896	1.38217	-0.755599	1.38203	-0.561581
1.38297	1.66898	1.38301	-0.755818	1.38286	-0.561478
1.3838	1.66896	1.38384	-0.755825	1.38369	-0.561245
1.38463	1.66966	1.38467	-0.755378	1.38453	-0.561409
1.38546	1.6699	1.3855	-0.75428	1.38536	-0.56146
1.3863	1.67024	1.38634	-0.754211	1.38619	-0.561161
1.38713	1.6704	1.38717	-0.754311	1.38702	-0.561401
1.38796	1.6697	1.388	-0.754664	1.38785	-0.561839
1.38879	1.66936	1.38883	-0.7543	1.38868	-0.561708
1.38963	1.6698	1.38966	-0.754574	1.38952	-0.561332
1.39046	1.67087	1.3905	-0.755538	1.39035	-0.561215
1.39129	1.67205	1.39133	-0.756403	1.39118	-0.561854
1.39212	1.67229	1.39216	-0.757084	1.39201	-0.561919
1.39295	1.67312	1.39299	-0.757721	1.39285	-0.561084
1.39379	1.67348	1.39382	-0.758119	1.39368	-0.561675
1.39462	1.67376	1.39465	-0.758039	1.39451	-0.561936
1.39545	1.67405	1.39549	-0.758569	1.39534	-0.56178
1.39628	1.67422	1.39632	-0.759101	1.39617	-0.562274
1.39711	1.67416	1.39715	-0.759149	1.39701	-0.562416
1.39794	1.6742	1.39798	-0.759332	1.39784	-0.562072
1.39878	1.67453	1.39881	-0.758902	1.39867	-0.563086
1.39961	1.67426	1.39965	-0.758388	1.3995	-0.563002
1.40044	1.67405	1.40048	-0.757419	1.40033	-0.563102
1.40127	1.67498	1.40131	-0.756481	1.40116	-0.56267
1.4021	1.67592	1.40214	-0.756262	1.402	-0.562285
1.40294	1.67621	1.40298	-0.756117	1.40283	-0.562456
1.40377	1.67526	1.40381	-0.75563	1.40366	-0.562663
1.4046	1.67433	1.40464	-0.755001	1.40449	-0.563786
1.40543	1.67454	1.40547	-0.755255	1.40532	-0.563731
1.40627	1.67466	1.4063	-0.755258	1.40616	-0.56289
1.4071	1.67417	1.40714	-0.754889	1.40699	-0.562592
1.40793	1.67468	1.40797	-0.754571	1.40782	-0.562268
1.40876	1.67474	1.4088	-0.753868	1.40865	-0.56201
1.40959	1.67408	1.40963	-0.754172	1.40948	-0.56233
1.41043	1.67357	1.41046	-0.755188	1.41032	-0.562473
1.41126	1.673	1.41129	-0.754919	1.41115	-0.562031
1.41209	1.67279	1.41213	-0.755358	1.41198	-0.561653
1.41292	1.67378	1.41296	-0.75568	1.41281	-0.560902
1.41375	1.67383	1.41379	-0.754752	1.41364	-0.559642
1.41458	1.67375	1.41462	-0.75501	1.41448	-0.558939
1.41542	1.67349	1.41545	-0.755478	1.41531	-0.55939
1.41625	1.67345	1.41629	-0.755542	1.41614	-0.559746
1.41708	1.67267	1.41712	-0.755643	1.41697	-0.55942
1.41791	1.67188	1.41795	-0.755639	1.4178	-0.559652
1.41874	1.67208	1.41878	-0.755697	1.41864	-0.560267
1.41958	1.67164	1.41962	-0.755275	1.41947	-0.560566
1.42041	1.67188	1.42045	-0.754575	1.4203	-0.561282
1.42124	1.6727	1.42128	-0.754399	1.42113	-0.560885
1.42207	1.67349	1.42211	-0.753689	1.42196	-0.560709
1.42291	1.6734	1.42294	-0.75215	1.4228	-0.561589
1.42374	1.67333	1.42378	-0.750466	1.42363	-0.562607
1.42457	1.67309	1.42461	-0.750154	1.42446	-0.562636
1.4254	1.67302	1.42544	-0.750386	1.42529	-0.563018
1.42623	1.6728	1.42627	-0.7509	1.42612	-0.56345
1.42707	1.67325	1.4271	-0.751375	1.42695	-0.563456
1.4279	1.67218	1.42794	-0.751746	1.42779	-0.563333
1.42873	1.67192	1.42877	-0.75182	1.42862	-0.564006
1.42956	1.67297	1.4296	-0.751636	1.42945	-0.563919
1.43039	1.67321	1.43043	-0.751887	1.43028	-0.564457
1.43122	1.67223	1.43126	-0.751975	1.43111	-0.565254
1.43206	1.67134	1.4321	-0.751701	1.43195	-0.564968
1.43289	1.6703	1.43293	-0.750676	1.43278	-0.563963
1.43372	1.67012	1.43376	-0.750035	1.43361	-0.563138
1.43455	1.6691	1.43459	-0.750465	1.43444	-0.563994
1.43538	1.66941	1.43542	-0.751351	1.43528	-0.563938
1.43622	1.66844	1.43626	-0.751623	1.43611	-0.563363
1.43705	1.66822	1.43709	-0.75121	1.43694	-0.563393
1.43788	1.66764	1.43792	-0.751122	1.43777	-0.562743
1.43871	1.66769	1.43875	-0.750875	1.4386	-0.563097
1.43955	1.66713	1.43958	-0.750485	1.43944	-0.56279
1.44038	1.66711	1.44042	-0.750202	1.44027	-0.562082
1.44121	1.66743	1.44125	-0.750355	1.4411	-0.562435
1.44204	1.66842	1.44208	-0.751223	1.44193	-0.562478
1.44287	1.66857	1.44291	-0.752121	1.44276	-0.562337
1.44371	1.66806	1.44374	-0.752267	1.44359	-0.562293
1.44454	1.66856	1.44458	-0.751637	1.44443	-0.561874
1.44537	1.66863	1.44541	-0.751617	1.44526	-0.562102
1.4462	1.66905	1.44624	-0.751697	1.44609	-0.561682
1.44703	1.66868	1.44707	-0.75208	1.44692	-0.561146
1.44786	1.66884	1.4479	-0.752593	1.44775	-0.561023
1.4487	1.66905	1.44874	-0.752608	1.44859	-0.560403
1.44953	1.66893	1.44957	-0.752677	1.44942	-0.559924
1.45036	1.67024	1.4504	-0.753143	1.45025	-0.559895
1.45119	1.6706	1.45123	-0.753017	1.45108	-0.558899
1.45202	1.67007	1.45206	-0.752246	1.45191	-0.558122
1.45286	1.67002	1.4529	-0.752187	1.45275	-0.557867
1.45369	1.67029	1.45373	-0.751988	1.45358	-0.557117
1.45452	1.67047	1.45456	-0.752267	1.45441	-0.557574
1.45535	1.67063	1.45539	-0.753044	1.45524	-0.558099
1.45619	1.67023	1.45622	-0.753261	1.45607	-0.558757
1.45702	1.66983	1.45706	-0.752915	1.45691	-0.559079
1.45785	1.67028	1.45789	-0.752871	1.45774	-0.559141
1.45868	1.67071	1.45872	-0.752587	1.45857	-0.559164
1.45951	1.67063	1.45955	-0.75153	1.4594	-0.558799
1.46035	1.67052	1.46038	-0.751289	1.46023	-0.558475
1.46118	1.6707	1.46122	-0.752062	1.46107	-0.558068
1.46201	1.67056	1.46205	-0.752322	1.4619	-0.557543
1.46284	1.66963	1.46288	-0.752567	1.46273	-0.556961
1.46367	1.66885	1.46371	-0.752935	1.46356	-0.557606
1.4645	1.66911	1.46454	-0.753427	1.46439	-0.55755
1.46534	1.66919	1.46538	-0.754142	1.46522	-0.557021
1.46617	1.66985	1.46621	-0.753922	1.46606	-0.556709
1.467	1.67038	1.46704	-0.754276	1.46689	-0.556556
1.46783	1.67003	1.46787	-0.754377	1.46772	-0.556258
1.46867	1.66945	1.4687	-0.75481	1.46855	-0.555669
1.4695	1.67053	1.46954	-0.754119	1.46938	-0.555872
1.47033	1.67063	1.47037	-0.754319	1.47022	-0.555418
1.47116	1.66954	1.4712	-0.754574	1.47105	-0.55535
1.47199	1.67009	1.47203	-0.753907	1.47188	-0.554803
1.47283	1.67048	1.47287	-0.753718	1.47271	-0.554645
1.47366	1.67177	1.4737	-0.754881	1.47355	-0.554742
1.47449	1.67208	1.47453	-0.755838	1.47438	-0.554515
1.47532	1.67184	1.47536	-0.756594	1.47521	-0.554561
1.47615	1.67243	1.47619	-0.755721	1.47604	-0.554351
1.47698	1.67243	1.47703	-0.755511	1.47687	-0.554164
1.47782	1.67314	1.47786	-0.755237	1.47771	-0.553909
1.47865	1.67291	1.47869	-0.754461	1.47854	-0.554122
1.47948	1.67293	1.47952	-0.75412	1.47937	-0.554345
1.48031	1.67282	1.48035	-0.75393	1.4802	-0.554009
1.48114	1.67265	1.48118	-0.754707	1.48103	-0.5544
1.48198	1.6723	1.48202	-0.755547	1.48186	-0.554211
1.48281	1.67349	1.48285	-0.755193	1.4827	-0.554031
1.48364	1.6724	1.48368	-0.754885	1.48353	-0.554129
1.48447	1.67287	1.48451	-0.755113	1.48436	-0.554408
1.48531	1.67277	1.48534	-0.755706	1.48519	-0.553889
1.48614	1.6722	1.48618	-0.757125	1.48602	-0.553179
1.48697	1.6725	1.48701	-0.757186	1.48686	-0.552461
1.4878	1.67355	1.48784	-0.758405	1.48769	-0.55221
1.48863	1.67376	1.48867	-0.757875	1.48852	-0.551956
1.48947	1.67457	1.48951	-0.757828	1.48935	-0.551846
1.4903	1.67468	1.49034	-0.75766	1.49018	-0.551665
1.49113	1.67463	1.49117	-0.757342	1.49102	-0.551664
1.49196	1.67377	1.492	-0.756892	1.49185	-0.551954
1.49279	1.67425	1.49283	-0.756377	1.49268	-0.552481
1.49362	1.67524	1.49367	-0.75692	1.49351	-0.553319
1.49446	1.67508	1.4945	-0.75695	1.49434	-0.554242
1.49529	1.67519	1.49533	-0.757232	1.49518	-0.554803
1.49612	1.67477	1.49616	-0.757415	1.49601	-0.554937
1.49695	1.67498	1.49699	-0.756748	1.49684	-0.555429
1.49778	1.67519	1.49782	-0.756557	1.49767	-0.555412
1.49862	1.67536	1.49866	-0.756845	1.4985	-0.555196
1.49945	1.67456	1.49949	-0.756949	1.49934	-0.555326
1.50028	1.67493	1.50032	-0.757114	1.50017	-0.55541
1.50111	1.67458	1.50115	-0.759248	1.501	-0.55528
1.50195	1.67504	1.50198	-0.759199	1.50183	-0.555404
1.50278	1.6755	1.50282	-0.759113	1.50266	-0.555768
1.50361	1.67509	1.50365	-0.759603	1.5035	-0.556335
1.50444	1.67516	1.50448	-0.758813	1.50433	-0.55641
1.50527	1.6752	1.50531	-0.759229	1.50516	-0.55575
1.50611	1.67493	1.50615	-0.760061	1.50599	-0.555557
1.50694	1.67455	1.50698	-0.75978	1.50682	-0.555782
1.50777	1.67394	1.50781	-0.760727	1.50765	-0.556062
1.5086	1.67273	1.50864	-0.760386	1.50849	-0.555915
1.50943	1.67281	1.50947	-0.7597	1.50932	-0.555727
1.51026	1.67236	1.51031	-0.759762	1.51015	-0.555354
1.5111	1.67169	1.51114	-0.760585	1.51098	-0.554912
1.51193	1.67161	1.51197	-0.760514	1.51181	-0.554558
1.51276	1.67148	1.5128	-0.76078	1.51265	-0.55448
1.51359	1.67091	1.51363	-0.76143	1.51348	-0.554474
1.51442	1.67049	1.51446	-0.760788	1.51431	-0.554088
1.51526	1.66953	1.5153	-0.758918	1.51514	-0.554037
1.51609	1.66924	1.51613	-0.7591	1.51598	-0.554275
1.51692	1.66946	1.51696	-0.758659	1.51681	-0.553863
1.51775	1.66943	1.51779	-0.759271	1.51764	-0.553048
1.51859	1.66952	1.51863	-0.758637	1.51847	-0.552494
1.51942	1.66948	1.51946	-0.759801	1.5193	-0.552163
1.52025	1.66991	1.52029	-0.760538	1.52014	-0.551904
1.52108	1.6704	1.52112	-0.760669	1.52097	-0.551837
1.52191	1.6706	1.52195	-0.760451	1.5218	-0.551626
1.52275	1.67086	1.52279	-0.760583	1.52263	-0.552203
1.52358	1.67002	1.52362	-0.761354	1.52346	-0.552349
1.52441	1.66939	1.52445	-0.762105	1.52429	-0.551954
1.52524	1.66955	1.52528	-0.762787	1.52513	-0.551641
1.52607	1.66921	1.52611	-0.762588	1.52596	-0.551518
1.5269	1.6696	1.52695	-0.762648	1.52679	-0.551765
1.52774	1.66951	1.52778	-0.76268	1.52762	-0.55181
1.52857	1.66914	1.52861	-0.763632	1.52845	-0.551168
1.5294	1.66851	1.52944	-0.762884	1.52929	-0.550747
1.53023	1.66825	1.53027	-0.762845	1.53012	-0.550452
1.53106	1.66799	1.53111	-0.763909	1.53095	-0.550135
1.5319	1.66756	1.53194	-0.764488	1.53178	-0.550124
1.53273	1.66697	1.53277	-0.765449	1.53261	-0.550123
1.53356	1.66671	1.5336	-0.766101	1.53345	-0.55047
1.53439	1.66669	1.53443	-0.766746	1.53428	-0.550224
1.53523	1.66692	1.53527	-0.767119	1.53511	-0.549778
1.53606	1.66712	1.5361	-0.766996	1.53594	-0.549052
1.53689	1.66715	1.53693	-0.766329	1.53677	-0.548389
1.53772	1.66724	1.53776	-0.766564	1.53761	-0.547745
1.53855	1.66718	1.53859	-0.766728	1.53844	-0.546658
1.53939	1.66731	1.53943	-0.766641	1.53927	-0.545924
1.54022	1.66755	1.54026	-0.766549	1.5401	-0.545412
1.54105	1.66757	1.54109	-0.766881	1.54093	-0.545573
1.54188	1.66807	1.54192	-0.7666	1.54177	-0.545796
1.54271	1.66835	1.54275	-0.765672	1.5426	-0.546874
1.54354	1.6677	1.54359	-0.765817	1.54343	-0.54703
1.54438	1.66749	1.54442	-0.766037	1.54426	-0.546858
1.54521	1.66769	1.54525	-0.766085	1.54509	-0.546642
1.54604	1.66788	1.54608	-0.766288	1.54592	-0.546853
1.54687	1.66818	1.54691	-0.765973	1.54676	-0.546924
1.54771	1.66868	1.54775	-0.76584	1.54759	-0.546187
1.54854	1.66859	1.54858	-0.76606	1.54842	-0.54588
1.54937	1.66941	1.54941	-0.76631	1.54925	-0.545513
1.5502	1.67028	1.55024	-0.767266	1.55008	-0.54508
1.55103	1.67029	1.55107	-0.767885	1.55092	-0.545112
1.55187	1.6706	1.55191	-0.767845	1.55175	-0.545249
1.5527	1.67049	1.55274	-0.767969	1.55258	-0.54554
1.55353	1.67094	1.55357	-0.768343	1.55341	-0.546108
1.55436	1.67101	1.5544	-0.768173	1.55425	-0.546452
1.55519	1.67118	1.55523	-0.768432	1.55508	-0.545891
1.55602	1.67154	1.55607	-0.769124	1.55591	-0.545898
1.55686	1.67166	1.5569	-0.769389	1.55674	-0.546055
1.55769	1.67162	1.55773	-0.769486	1.55757	-0.546178
1.55852	1.67157	1.55856	-0.769335	1.55841	-0.546541
1.55935	1.67124	1.55939	-0.769045	1.55924	-0.547062
1.56018	1.67121	1.56023	-0.768835	1.56007	-0.547351
1.56102	1.67137	1.56106	-0.76831	1.5609	-0.547015
1.56185	1.67066	1.56189	-0.768306	1.56173	-0.546716
1.56268	1.67073	1.56272	-0.768969	1.56256	-0.546465
1.56351	1.67096	1.56356	-0.769226	1.5634	-0.546292
1.56435	1.67164	1.56439	-0.768991	1.56423	-0.545268
1.56518	1.67233	1.56522	-0.769041	1.56506	-0.545065
1.56601	1.67216	1.56605	-0.768875	1.56589	-0.545056
1.56684	1.67176	1.56688	-0.768771	1.56672	-0.545414
1.56767	1.67132	1.56771	-0.7683	1.56756	-0.545427
1.56851	1.6706	1.56855	-0.767719	1.56839	-0.544972
1.56934	1.6706	1.56938	-0.767315	1.56922	-0.545028
1.57017	1.67044	1.57021	-0.767019	1.57005	-0.546125
1.571	1.67054	1.57104	-0.767229	1.57088	-0.546253
1.57183	1.67016	1.57187	-0.766804	1.57172	-0.547206
1.57266	1.67006	1.57271	-0.766572	1.57255	-0.546826
1.5735	1.66937	1.57354	-0.766009	1.57338	-0.546254
1.57433	1.67076	1.57437	-0.765414	1.57421	-0.546249
1.57516	1.67166	1.5752	-0.765381	1.57504	-0.545307
1.57599	1.67144	1.57604	-0.764936	1.57588	-0.544616
1.57682	1.67103	1.57687	-0.76445	1.57671	-0.54346
1.57766	1.67073	1.5777	-0.764319	1.57754	-0.5437
1.57849	1.67074	1.57853	-0.764931	1.57837	-0.543623
1.57932	1.67015	1.57936	-0.765755	1.5792	-0.543971
1.58015	1.66982	1.5802	-0.765743	1.58004	-0.544674
1.58099	1.66929	1.58103	-0.765994	1.58087	-0.544057
1.58182	1.66871	1.58186	-0.766184	1.5817	-0.543777
1.58265	1.66892	1.58269	-0.766411	1.58253	-0.542987
1.58348	1.66878	1.58352	-0.766992	1.58336	-0.542245
1.58431	1.66765	1.58435	-0.767175	1.5842	-0.540946
1.58515	1.66669	1.58519	-0.767481	1.58503	-0.540759
1.58598	1.66643	1.58602	-0.767757	1.58586	-0.540139
1.58681	1.66629	1.58685	-0.767704	1.58669	-0.539885
1.58764	1.66644	1.58768	-0.768219	1.58752	-0.540112
1.58847	1.6667	1.58851	-0.768958	1.58835	-0.538889
1.5893	1.66609	1.58935	-0.769177	1.58919	-0.538666
1.59014	1.66587	1.59018	-0.769231	1.59002	-0.537759
1.59097	1.66654	1.59101	-0.769463	1.59085	-0.538199
1.5918	1.66729	1.59184	-0.76929	1.59168	-0.536521
1.59263	1.66738	1.59268	-0.768806	1.59251	-0.537672
1.59346	1.6667	1.59351	-0.76849	1.59335	-0.537814
1.5943	1.66737	1.59434	-0.768413	1.59418	-0.537706
1.59513	1.66694	1.59517	-0.768328	1.59501	-0.536931
1.59596	1.66774	1.596	-0.768024	1.59584	-0.536054
1.59679	1.66737	1.59684	-0.767902	1.59668	-0.536143
1.59763	1.66882	1.59767	-0.767914	1.59751	-0.535721
1.59846	1.66905	1.5985	-0.767861	1.59834	-0.536183
1.59929	1.66857	1.59933	-0.767983	1.59917	-0.535715
1.60012	1.66903	1.60016	-0.767304	1.6	-0.536104
1.60095	1.66904	1.60099	-0.766358	1.60083	-0.535566
1.60179	1.6694	1.60183	-0.766564	1.60167	-0.535668
1.60262	1.66963	1.60266	-0.766862	1.6025	-0.535742
1.60345	1.66889	1.60349	-0.767377	1.60333	-0.535711
1.60428	1.6681	1.60432	-0.767634	1.60416	-0.535359
1.60511	1.6688	1.60516	-0.767633	1.60499	-0.535357
1.60594	1.66866	1.60599	-0.767568	1.60583	-0.535604
1.60678	1.66803	1.60682	-0.767703	1.60666	-0.535754
1.60761	1.66656	1.60765	-0.766404	1.60749	-0.534797
1.60844	1.66632	1.60848	-0.765499	1.60832	-0.533547
1.60927	1.66643	1.60932	-0.765172	1.60915	-0.53249
1.6101	1.66709	1.61015	-0.764715	1.60999	-0.532239
1.61094	1.66762	1.61098	-0.766251	1.61082	-0.531468
1.61177	1.66806	1.61181	-0.766439	1.61165	-0.531238
1.6126	1.66902	1.61264	-0.766176	1.61248	-0.530325
1.61343	1.66954	1.61348	-0.765339	1.61331	-0.529552
1.61427	1.66986	1.61431	-0.765337	1.61415	-0.52999
1.6151	1.67013	1.61514	-0.765342	1.61498	-0.529161
1.61593	1.67096	1.61597	-0.765511	1.61581	-0.528612
1.61676	1.66991	1.6168	-0.76671	1.61664	-0.529071
1.61759	1.66863	1.61764	-0.766673	1.61747	-0.530432
1.61843	1.66892	1.61847	-0.767145	1.61831	-0.530815
1.61926	1.6694	1.6193	-0.767502	1.61914	-0.530014
1.62009	1.66795	1.62013	-0.767297	1.61997	-0.529566
1.62092	1.66777	1.62096	-0.766963	1.6208	-0.528619
1.62175	1.66847	1.6218	-0.764736	1.62163	-0.528281
1.62258	1.669	1.62263	-0.765204	1.62247	-0.528897
1.62342	1.66828	1.62346	-0.764767	1.6233	-0.528308
1.62425	1.66825	1.62429	-0.764286	1.62413	-0.527865
1.62508	1.66772	1.62512	-0.762976	1.62496	-0.527964
1.62591	1.66854	1.62596	-0.762213	1.62579	-0.527692
1.62675	1.67011	1.62679	-0.763024	1.62662	-0.527498
1.62758	1.67025	1.62762	-0.762494	1.62746	-0.527635
1.62841	1.67075	1.62845	-0.761278	1.62829	-0.527152
1.62924	1.67154	1.62928	-0.761657	1.62912	-0.526624
1.63007	1.67111	1.63012	-0.760769	1.62995	-0.527171
1.63091	1.67199	1.63095	-0.760293	1.63078	-0.527118
1.63174	1.67238	1.63178	-0.760768	1.63162	-0.526426
1.63257	1.67069	1.63261	-0.76083	1.63245	-0.526129
1.6334	1.67023	1.63344	-0.760554	1.63328	-0.526805
1.63423	1.66958	1.63428	-0.760866	1.63411	-0.526218
1.63506	1.67069	1.63511	-0.760699	1.63495	-0.525829
1.6359	1.67055	1.63594	-0.761099	1.63578	-0.52573
1.63673	1.67187	1.63677	-0.761865	1.63661	-0.525198
1.63756	1.67128	1.6376	-0.761314	1.63744	-0.525338
1.63839	1.6715	1.63844	-0.761886	1.63827	-0.525441
1.63922	1.67029	1.63927	-0.762361	1.63911	-0.525911
1.64006	1.67006	1.6401	-0.762699	1.63994	-0.52524
1.64089	1.67028	1.64093	-0.763096	1.64077	-0.524333
1.64172	1.66995	1.64176	-0.763963	1.6416	-0.522828
1.64255	1.67016	1.6426	-0.764372	1.64243	-0.522046
1.64339	1.66984	1.64343	-0.765695	1.64326	-0.522356
1.64422	1.66981	1.64426	-0.766447	1.6441	-0.522352
1.64505	1.67043	1.64509	-0.766548	1.64493	-0.521807
1.64588	1.67075	1.64592	-0.766367	1.64576	-0.52167
1.64671	1.67151	1.64676	-0.766074	1.64659	-0.521828
1.64755	1.67082	1.64759	-0.765884	1.64742	-0.52162
1.64838	1.67132	1.64842	-0.765944	1.64826	-0.52123
1.64921	1.67281	1.64925	-0.76689	1.64909	-0.521196
1.65004	1.67345	1.65008	-0.767522	1.64992	-0.521359
1.65087	1.67371	1.65092	-0.768014	1.65075	-0.521599
1.65171	1.67387	1.65175	-0.768898	1.65158	-0.522869
[truncated: 26,350 more rows]
