# Supplementary material for: The neuronal calcium sensor NCS-1 regulates the phosphorylation state and activity of the Gα chaperone and GEF Ric-8A
Source: eLife journal article supplement (doi:10.7554/elife.86151), 2023-11-27
Supplement: supp [file Fig2BandD-nanoDSF-raw.xlsx]

## Sheet: NCS1-2mM-EGTA
NCS1-2mM EGTA	REPEAT 1	REPEAT 2	REPEAT 3
Temperature [°C]	Ratio 350 nm / 330 nm	Ratio 350 nm / 330 nm	Ratio 350 nm / 330 nm
35.14	0.9045	0.916575	0.887708
35.29	0.9045	0.916595	0.887767
35.409	0.9045	0.916611	0.88787
35.558	0.9045	0.916611	0.887956
35.677	0.9045	0.916636	0.888051
35.797	0.9045	0.91665	0.888115
35.916	0.9045	0.916656	0.888174
35.976	0.9045	0.916671	0.88823
36.065	0.9045	0.916681	0.88833
36.155	0.9045	0.916699	0.88837
36.244	0.9045	0.916713	0.88845
36.423	0.9045	0.916723	0.888492
36.513	0.9046	0.916727	0.888588
36.602	0.9046	0.916742	0.888627
36.722	0.9046	0.916747	0.888686
36.841	0.9046	0.916763	0.888787
36.901	0.9046	0.916775	0.888826															s
37.02	0.9046	0.91678	0.888928
37.08	0.9046	0.916793	0.88899
37.199	0.9046	0.916796	0.889073
37.289	0.9047	0.916806	0.889115
37.408	0.9047	0.916813	0.889201
37.497	0.9047	0.91682	0.889271
37.617	0.9048	0.916825	0.889364
37.677	0.9048	0.91683	0.889432
37.796	0.9049	0.916834	0.889497
37.915	0.9049	0.916841	0.889582
38.005	0.905	0.916846	0.889623
38.094	0.905	0.916852	0.889688
38.184	0.9051	0.916859	0.889746
38.274	0.9052	0.916872	0.889826
38.423	0.9053	0.916881	0.889903
38.512	0.9053	0.916892	0.890013
38.632	0.9054	0.916905	0.890071
38.722	0.9054	0.916927	0.890112
38.811	0.9055	0.916944	0.890166
38.93	0.9055	0.916964	0.890218
38.99	0.9055	0.916986	0.890295
39.08	0.9056	0.917023	0.890366
39.199	0.9056	0.917054	0.89041
39.349	0.9056	0.917079	0.890446
39.468	0.9056	0.917104	0.890522
39.558	0.9056	0.917137	0.8906
39.647	0.9056	0.917156	0.89064
39.737	0.9056	0.917189	0.890695
39.856	0.9056	0.917207	0.890728
39.946	0.9056	0.917227	0.890758
40.035	0.9056	0.917255	0.890786
40.125	0.9056	0.917276	0.890812
40.215	0.9056	0.917318	0.890817
40.274	0.9057	0.917341	0.890826
40.424	0.9057	0.917372	0.890825
40.513	0.9057	0.917403	0.890821
40.633	0.9057	0.917432	0.890816
40.752	0.9057	0.917469	0.890814
40.842	0.9057	0.917502	0.89081
40.935	0.9058	0.917542	0.89081
41.021	0.9058	0.91758	0.890812
41.111	0.9059	0.917617	0.890822
41.26	0.9059	0.917668	0.890837
41.35	0.906	0.917741	0.890862
41.44	0.906	0.9178	0.890879
41.559	0.9061	0.917861	0.8909
41.649	0.9062	0.917909	0.89093
41.739	0.9062	0.917959	0.890954
41.828	0.9063	0.918012	0.891001
41.948	0.9064	0.918066	0.891018
42.067	0.9066	0.918124	0.891079
42.157	0.9067	0.91818	0.891141
42.28	0.9068	0.918244	0.891163
42.336	0.9069	0.918301	0.891224
42.426	0.907	0.918398	0.891281
42.549	0.9071	0.918457	0.891364
42.665	0.9072	0.918515	0.891465
42.815	0.9074	0.918589	0.891543
42.908	0.9074	0.918662	0.89162
42.934	0.9075	0.918717	0.891702
43.054	0.9076	0.918752	0.891757
43.174	0.9076	0.918808	0.891905
43.293	0.9077	0.918863	0.891981
43.383	0.9078	0.918949	0.892046
43.473	0.9078	0.919027	0.892118
43.566	0.9079	0.91911	0.892166
43.686	0.908	0.919164	0.892199
43.801	0.9081	0.919206	0.892222
43.891	0.9082	0.919289	0.892254
43.981	0.9083	0.919353	0.892232
44.074	0.9084	0.91945	0.892245
44.131	0.9084	0.919523	0.89224
44.28	0.9086	0.91963	0.892221
44.37	0.9087	0.919675	0.892218
44.459	0.9088	0.919759	0.892217
44.609	0.909	0.919868	0.892222
44.729	0.9091	0.919981	0.892226
44.792	0.9092	0.920127	0.892237
44.912	0.9094	0.920221	0.892262
44.968	0.9095	0.920281	0.892279
45.088	0.9097	0.920437	0.892302
45.177	0.9098	0.920499	0.892329
45.267	0.91	0.92057	0.892349
45.447	0.9103	0.920671	0.89238
45.536	0.9104	0.920818	0.892405
45.656	0.9107	0.921038	0.892453
45.746	0.9109	0.921161	0.892533
45.806	0.911	0.921323	0.892659
45.926	0.9112	0.921399	0.892762
45.985	0.9113	0.92153	0.892829
46.075	0.9115	0.921707	0.892973
46.195	0.9118	0.921802	0.893091
46.285	0.9119	0.92205	0.893213
46.404	0.9121	0.922188	0.89335
46.524	0.9124	0.922326	0.893586
46.677	0.9126	0.922474	0.893733
46.737	0.9127	0.922588	0.893945
46.853	0.9129	0.922835	0.894031
46.947	0.913	0.923047	0.894165
47.003	0.9131	0.923206	0.894417
47.127	0.9132	0.923372	0.89456
47.213	0.9134	0.923577	0.894747
47.332	0.9135	0.923705	0.89488
47.422	0.9137	0.923874	0.895015
47.542	0.9138	0.924086	0.895131
47.662	0.914	0.924269	0.895261
47.752	0.9142	0.9245	0.895368
47.815	0.9143	0.924736	0.895483
47.935	0.9145	0.925038	0.895599
48.021	0.9147	0.925282	0.895788
48.141	0.9149	0.925403	0.895931
48.205	0.915	0.925591	0.89601
48.351	0.9153	0.925778	0.896159
48.44	0.9155	0.925957	0.896305
48.5	0.9156	0.926145	0.896392
48.65	0.9159	0.926457	0.896557
48.774	0.9161	0.926656	0.896694
48.86	0.9163	0.926913	0.896838
48.95	0.9165	0.927109	0.896975
49.04	0.9167	0.927297	0.897223
49.159	0.917	0.927428	0.897449
49.253	0.9172	0.927626	0.897711
49.369	0.9174	0.927956	0.897844
49.489	0.9177	0.928219	0.89815
49.579	0.9179	0.928425	0.898464
49.669	0.9182	0.928614	0.898699
49.759	0.9184	0.928811	0.898953
49.819	0.9186	0.929071	0.899309
49.972	0.919	0.929203	0.899493
50.058	0.9192	0.929464	0.899757
50.144	0.9194	0.929724	0.900021
50.238	0.9197	0.929983	0.900469
50.388	0.9201	0.930048	0.900838
50.478	0.9203	0.930443	0.90112
50.601	0.9206	0.930651	0.901398
50.718	0.9209	0.930775	0.901708
50.778	0.921	0.93111	0.902001
50.868	0.9213	0.93132	0.902312
50.987	0.9216	0.931515	0.902747
51.077	0.9218	0.931717	0.903167
51.197	0.9221	0.931926	0.903491
51.287	0.9223	0.932208	0.903828
51.407	0.9226	0.932423	0.904151
51.497	0.9228	0.932622	0.904574
51.587	0.9231	0.932988	0.904985
51.677	0.9233	0.933277	0.905286
51.797	0.9237	0.933483	0.90558
51.95	0.9241	0.933783	0.905856
51.977	0.9242	0.933939	0.906153
52.097	0.9246	0.934158	0.906533
52.187	0.9249	0.934381	0.90682
52.31	0.9253	0.93468	0.907111
52.426	0.9256	0.934984	0.907496
52.52	0.9259	0.93514	0.907918
52.636	0.9263	0.935434	0.908419
52.67	0.9264	0.935819	0.908645
52.79	0.9268	0.93606	0.908986
52.936	0.9272	0.936291	0.90934
53	0.9274	0.936512	0.909685
53.116	0.9277	0.936756	0.910148
53.236	0.9281	0.936979	0.910495
53.326	0.9284	0.937214	0.910962
53.416	0.9287	0.937529	0.911308
53.536	0.929	0.937767	0.911537
53.63	0.9294	0.938163	0.911861
53.75	0.9298	0.938484	0.912435
53.806	0.9299	0.938727	0.912763
53.9	0.9303	0.939059	0.913086
54.046	0.9308	0.939218	0.913441
54.106	0.931	0.939547	0.913892
54.23	0.9314	0.9397	0.914377
54.35	0.9318	0.940114	0.914866
54.436	0.9321	0.94029	0.915255
54.556	0.9325	0.940699	0.915661
54.677	0.9329	0.940878	0.916059
54.736	0.9331	0.941048	0.916607
54.826	0.9333	0.941374	0.917019
54.98	0.9338	0.941628	0.917439
55.07	0.9341	0.941965	0.917995
55.187	0.9345	0.942315	0.918408
55.247	0.9347	0.942745	0.918947
55.307	0.9349	0.942913	0.919329
55.457	0.9354	0.943155	0.919613
55.577	0.9358	0.943587	0.920137
55.671	0.9361	0.943672	0.92053
55.757	0.9364	0.944016	0.92118
55.907	0.9369	0.944284	0.921471
55.967	0.9371	0.94472	0.922008
56.061	0.9374	0.945075	0.922556
56.181	0.9379	0.945161	0.923105
56.267	0.9382	0.945505	0.923391
56.358	0.9385	0.945877	0.923824
56.448	0.9388	0.946313	0.924265
56.598	0.9393	0.946492	0.924732
56.688	0.9396	0.946866	0.925331
56.782	0.94	0.947124	0.92608
56.898	0.9404	0.947316	0.926373
56.992	0.9407	0.947682	0.926947
57.052	0.9409	0.947956	0.927522
57.172	0.9414	0.948322	0.927938
57.258	0.9417	0.948586	0.928359
57.379	0.9421	0.948873	0.92889
57.472	0.9425	0.949227	0.929007
57.589	0.9429	0.949501	0.929404
57.709	0.9434	0.949692	0.930138
57.829	0.9438	0.950148	0.930507
57.923	0.9442	0.950584	0.930748
58.01	0.9445	0.950763	0.931253
58.1	0.9448	0.951126	0.931628
58.19	0.9451	0.951305	0.932136
58.284	0.9455	0.951556	0.932523
58.404	0.9459	0.951998	0.932914
58.52	0.9464	0.952256	0.933452
58.64	0.9468	0.952511	0.933722
58.764	0.9473	0.952689	0.934273
58.851	0.9476	0.953096	0.934834
58.915	0.9478	0.953439	0.935386
59.035	0.9483	0.953685	0.935797
59.121	0.9486	0.953836	0.936364
59.215	0.9489	0.954085	0.936654
59.301	0.9492	0.954414	0.93707
59.425	0.9497	0.954733	0.937647
59.546	0.9501	0.955042	0.938214
59.636	0.9504	0.955274	0.93864
59.696	0.9507	0.955491	0.93894
59.816	0.9511	0.955715	0.939653
59.903	0.9514	0.956033	0.940092
60.027	0.9518	0.956328	0.940517
60.177	0.9524	0.956558	0.940994
60.267	0.9527	0.956782	0.941611
60.354	0.953	0.956993	0.942237
60.444	0.9534	0.957225	0.942712
60.564	0.9538	0.957517	0.943194
60.628	0.9541	0.957823	0.943661
60.715	0.9544	0.958044	0.944145
60.835	0.9548	0.958482	0.944721
60.955	0.9553	0.958554	0.945472
61.049	0.9556	0.958774	0.945909
61.139	0.956	0.958989	0.946323
61.256	0.9564	0.959264	0.946604
61.38	0.9568	0.959557	0.947118
61.47	0.9571	0.959765	0.947609
61.56	0.9574	0.960031	0.947972
61.617	0.9576	0.960168	0.948212
61.767	0.9581	0.960366	0.948687
61.887	0.9584	0.960622	0.949162
61.951	0.9587	0.960878	0.949642
62.072	0.959	0.961126	0.949883
62.158	0.9593	0.961369	0.950244
62.278	0.9597	0.961523	0.950854
62.372	0.96	0.961644	0.951357
62.459	0.9603	0.961872	0.951631
62.613	0.9608	0.962046	0.952142
62.704	0.9611	0.962206	0.952558
62.764	0.9612	0.962437	0.952816
62.884	0.9616	0.962605	0.953353
62.974	0.9619	0.96282	0.953751
63.121	0.9623	0.962879	0.954265
63.185	0.9625	0.963166	0.954772
63.305	0.9628	0.963337	0.95528
63.392	0.963	0.963564	0.955648
63.486	0.9633	0.963798	0.956013
63.602	0.9636	0.964032	0.956243
63.696	0.9638	0.964142	0.956729
63.787	0.9641	0.964319	0.957102
63.937	0.9645	0.964494	0.957589
64.028	0.9647	0.964781	0.957944
64.114	0.965	0.965016	0.958431
64.205	0.9652	0.965239	0.958906
64.295	0.9655	0.965404	0.959054
64.385	0.9657	0.965567	0.959403
64.536	0.9661	0.965667	0.959893
64.63	0.9663	0.965825	0.960378
64.72	0.9666	0.966088	0.960818
64.81	0.9668	0.966289	0.961257
64.9	0.9671	0.966435	0.96157
65.017	0.9674	0.966572	0.961872
65.108	0.9676	0.966719	0.962167
65.258	0.968	0.966859	0.962547
65.352	0.9682	0.967001	0.962736
65.439	0.9684	0.967095	0.963017
65.563	0.9687	0.967334	0.963499
65.62	0.9689	0.967478	0.963798
65.744	0.9692	0.967623	0.964103
65.864	0.9695	0.96787	0.964523
65.925	0.9696	0.968071	0.964616
66.045	0.9699	0.968223	0.965072
66.135	0.9701	0.968379	0.965528
66.226	0.9703	0.968523	0.965998
66.346	0.9706	0.968692	0.966465
66.467	0.9708	0.968792	0.96694
66.587	0.9711	0.969058	0.967175
66.648	0.9712	0.969217	0.967643
66.738	0.9714	0.969356	0.967863
66.855	0.9716	0.969553	0.968301
66.949	0.9718	0.969743	0.968631
67.069	0.9721	0.969883	0.96904
67.16	0.9723	0.970022	0.969352
67.22	0.9724	0.97016	0.969621
67.341	0.9727	0.970324	0.969898
67.491	0.973	0.97049	0.970314
67.551	0.9731	0.970639	0.970587
67.672	0.9733	0.970786	0.970816
67.793	0.9735	0.97086	0.971073
67.879	0.9737	0.970936	0.971374
67.973	0.9738	0.97108	0.971544
68.064	0.974	0.97122	0.971845
68.184	0.9741	0.971362	0.972142
68.244	0.9742	0.971469	0.972337
68.395	0.9745	0.97158	0.972533
68.456	0.9746	0.971687	0.972778
68.576	0.9747	0.971809	0.973017
68.667	0.9749	0.971962	0.973074
68.787	0.9751	0.972081	0.973334
68.908	0.9752	0.972239	0.973477
68.994	0.9754	0.972399	0.973658
69.089	0.9755	0.972475	0.973791
69.205	0.9757	0.972674	0.973878
69.33	0.9758	0.972789	0.974062
69.39	0.9759	0.972904	0.974152
69.481	0.976	0.973016	0.974408
69.571	0.9761	0.973126	0.974619
69.722	0.9763	0.973273	0.974842
69.812	0.9764	0.973338	0.974937
69.933	0.9765	0.973521	0.975166
69.993	0.9766	0.973659	0.975347
70.114	0.9767	0.973727	0.975584
70.204	0.9768	0.973864	0.975767
70.295	0.9769	0.973927	0.975951
70.446	0.9771	0.974024	0.976078
70.536	0.9772	0.974185	0.976328
70.657	0.9774	0.974279	0.976514
70.717	0.9774	0.974375	0.976811
70.808	0.9776	0.974473	0.976981
70.898	0.9777	0.97461	0.977199
71.045	0.9778	0.974795	0.97736
71.166	0.9779	0.974867	0.977512
71.26	0.978	0.975023	0.977667
71.32	0.9781	0.975106	0.977824
71.441	0.9782	0.975304	0.978019
71.532	0.9782	0.975424	0.97812
71.653	0.9783	0.975506	0.978321
71.743	0.9784	0.975664	0.978476
71.833	0.9785	0.975817	0.978728
71.924	0.9786	0.97593	0.97893
72.045	0.9787	0.97604	0.979026
72.166	0.9788	0.976183	0.979218
72.286	0.9789	0.976358	0.979357
72.377	0.979	0.976429	0.979496
72.467	0.979	0.976526	0.979633
72.588	0.9791	0.97659	0.979814
72.648	0.9792	0.976688	0.97998
72.739	0.9792	0.976816	0.980099
72.86	0.9793	0.976935	0.980207
72.98	0.9794	0.977041	0.980314
73.101	0.9795	0.977165	0.980444
73.161	0.9795	0.977243	0.980538
73.282	0.9796	0.977299	0.980605
73.403	0.9797	0.977337	0.980715
73.494	0.9797	0.977414	0.980771
73.554	0.9798	0.977465	0.980902
73.675	0.9799	0.977524	0.981008
73.762	0.98	0.977584	0.981112
73.882	0.9801	0.977627	0.981191
74.007	0.9802	0.977664	0.98127
74.098	0.9803	0.977716	0.981353
74.188	0.9804	0.977763	0.981437
74.279	0.9805	0.977782	0.981489
74.369	0.9806	0.97783	0.981588
74.49	0.9807	0.977846	0.981674
74.611	0.9808	0.977881	0.981741
74.728	0.9808	0.977894	0.981782
74.822	0.9809	0.977911	0.981817
74.913	0.981	0.977941	0.981852
75.004	0.981	0.977962	0.981882
75.094	0.9811	0.977983	0.981922
75.185	0.9812	0.978005	0.981969
75.275	0.9812	0.978042	0.982022
75.427	0.9813	0.978051	0.98205
75.517	0.9814	0.978082	0.982115
75.668	0.9814	0.978106	0.982178
75.729	0.9815	0.978127	0.982234
75.819	0.9815	0.978139	0.982308
75.91	0.9816	0.978154	0.982344
76.001	0.9816	0.978159	0.982404
76.121	0.9817	0.978169	0.982471
76.212	0.9817	0.97818	0.982594
76.333	0.9817	0.978193	0.982675
76.424	0.9817	0.978212	0.982777
76.541	0.9817	0.978237	0.982882
76.631	0.9817	0.97825	0.982931
76.756	0.9816	0.978261	0.983009
76.847	0.9816	0.978277	0.983078
76.938	0.9816	0.978294	0.983138
76.998	0.9815	0.978305	0.983195
77.119	0.9815	0.978315	0.983267
77.24	0.9814	0.978328	0.983331
77.331	0.9814	0.978334	0.983389
77.451	0.9813	0.978348	0.983432
77.572	0.9812	0.978355	0.983486
77.667	0.9812	0.978378	0.983502
77.784	0.9811	0.97839	0.983573
77.844	0.9811	0.978424	0.983592
77.935	0.9811	0.978452	0.983619
78.056	0.981	0.978484	0.983644
78.147	0.981	0.978516	0.98365
78.298	0.9809	0.978538	0.983647
78.419	0.9809	0.978563	0.983653
78.54	0.9809	0.978586	0.983642
78.631	0.9808	0.978603	0.983633
78.691	0.9808	0.978629	0.983628
78.782	0.9808	0.978642	0.983622
78.872	0.9808	0.978647	0.983642
78.963	0.9808	0.978649	0.983665
79.084	0.9808	0.978644	0.983702
79.205	0.9808	0.978637	0.983734
79.3	0.9808	0.978627	0.983768
79.387	0.9808	0.978617	0.983768
79.478	0.9808	0.978605	0.983843
79.568	0.9808	0.97859	0.9839
79.689	0.9809	0.978564	0.983946
79.81	0.9809	0.978535	0.983961
79.901	0.9809	0.978513	0.984013
79.961	0.9809	0.9785	0.98406
80.113	0.981	0.978478	0.984102
80.204	0.981	0.978462	0.984128
80.294	0.981	0.978448	0.984166
80.385	0.981	0.978436	0.984201
80.506	0.9811	0.978429	0.984186
80.601	0.9811	0.978424	0.984187
80.722	0.9811	0.978425	0.984178
80.839	0.9811	0.97843	0.984147
80.96	0.9811	0.978442	0.984112
81.021	0.9811	0.97845	0.984086
81.142	0.9812	0.978461	0.984026
81.232	0.9812	0.978474	0.983944
81.354	0.9812	0.97848	0.983859
81.414	0.9811	0.978487	0.983744
81.505	0.9811	0.978488	0.983645
81.596	0.9811	0.978491	0.983511
81.717	0.9811	0.978474	0.983397
81.808	0.9811	0.978463	0.983218
81.959	0.9811	0.978436	0.983078
82.08	0.981	0.978411	0.982843
82.201	0.981	0.978392	0.982847
82.292	0.981	0.978345	0.982555
82.353	0.981	0.978303	0.982428
82.443	0.981	0.978268	0.982245
82.564	0.981	0.978189	0.982155
82.655	0.981	0.97812	0.982043
82.75	0.9809	0.978072	0.981947
82.867	0.9809	0.978042	0.981871
82.932	0.9809	0.977958	0.981782
83.019	0.9809	0.977926	0.981706
83.14	0.9809	0.977881	0.981659
83.261	0.9809	0.977827	0.981634
83.386	0.9808	0.977804	0.98162
83.473	0.9808	0.977763	0.981611
83.564	0.9807	0.977741	0.981615
83.655	0.9807	0.977706	0.981664
83.776	0.9806	0.977687	0.981702
83.867	0.9806	0.977673	0.981729
83.954	0.9805	0.977643	0.981751
84.109	0.9804	0.97761	0.981778
84.2	0.9803	0.977585	0.981787
84.291	0.9802	0.977554	0.981811
84.412	0.9802	0.977492	0.981818
84.473	0.9801	0.977464	0.981837
84.56	0.9801	0.977422	0.981843
84.719	0.9799	0.977359	0.981843
84.84	0.9799	0.977309	0.981836
84.897	0.9798	0.977254	0.98181
85.049	0.9797	0.977202	0.981774
85.109	0.9797	0.977147	0.981724
85.2	0.9796	0.977071	0.981673
85.295	0.9795	0.977014	0.981627
85.386	0.9795	0.976916	0.981547
85.473	0.9794	0.976856	0.981493
85.624	0.9793	0.976773	0.98141
85.715	0.9793	0.976733	0.98132
85.806	0.9793	0.976655	0.98125
85.897	0.9792	0.976578	0.981127
86.019	0.9792	0.976522	0.981023
86.113	0.9791	0.976476	0.98091
86.261	0.9791	0.976395	0.980785
86.322	0.979	0.976362	0.980654
86.443	0.979	0.976311	0.980394
86.504	0.9789	0.976254	0.980293
86.598	0.9789	0.976193	0.980119
86.716	0.9788	0.976116	0.979938
86.807	0.9787	0.976047	0.979619
86.958	0.9786	0.975941	0.979357
87.049	0.9785	0.975857	0.979158
87.144	0.9784	0.97578	0.978889
87.231	0.9783	0.975693	0.978771
87.353	0.9782	0.975598	0.978505
87.474	0.9781	0.975461	0.978319
87.535	0.978	0.97535	0.978139
87.656	0.9778	0.975199	0.977909
87.747	0.9777	0.975121	0.977789
87.838	0.9776	0.975008	0.977571
87.963	0.9774	0.974844	0.977336
88.054	0.9773	0.974687	0.97723
88.145	0.9771	0.974563	0.977006
88.232	0.9769	0.974395	0.976777
88.354	0.9767	0.974266	0.976606
88.475	0.9765	0.974136	0.976488
88.57	0.9763	0.974016	0.976187
88.661	0.9761	0.973879	0.976003
88.778	0.9758	0.973716	0.975812
88.9	0.9756	0.973539	0.975631
88.964	0.9755	0.973406	0.975381
89.085	0.9752	0.973265	0.975244
89.173	0.9751	0.973136	0.975005
89.294	0.9749	0.972971	0.974833
89.389	0.9747	0.972781	0.974559
89.48	0.9746	0.972572	0.974461
89.571	0.9745	0.972397	0.974309
89.689	0.9743	0.972111	0.97412
89.749	0.9742	0.972001	0.973985
89.875	0.9741	0.971875	0.973816
89.962	0.9739	0.971645	0.973724
90.083	0.9738	0.971408	0.973543
90.205	0.9736	0.971236	0.973404
90.265	0.9735	0.970931	0.973184
90.391	0.9733	0.970758	0.97296
90.482	0.9731	0.97058	0.972834
90.63	0.9729	0.970395	0.972617
90.691	0.9728	0.970155	0.972305
90.812	0.9727	0.969975	0.971998
90.937	0.9725	0.969793	0.971694
91.059	0.9723	0.96961	0.971457
91.119	0.9723	0.969361	0.971224
91.21	0.9721	0.969235	0.970998
91.302	0.972	0.968912	0.970709
91.423	0.9718	0.968716	0.970549
91.541	0.9716	0.968525	0.970321
91.601	0.9715	0.968316	0.970116
91.692	0.9713	0.968114	0.969668
91.818	0.9711	0.967846	0.969512
91.909	0.9709	0.967642	0.969171
91.996	0.9707	0.967439	0.968819
92.148	0.9704	0.967171	0.968559
92.243	0.9701	0.966908	0.968297
92.33	0.9699	0.966776	0.968017
92.425	0.9697	0.966458	0.967677
92.547	0.9694	0.966255	0.967402
92.638	0.9692	0.966061	0.967122
92.699	0.969	0.965876	0.966847
92.82	0.9688	0.965683	0.966467
92.972	0.9683	0.96543	0.966073
93.033	0.9681	0.965229	0.965772
93.154	0.9677	0.96504	0.965467
93.215	0.9675	0.964784	0.965042
93.337	0.967	0.964584	0.96471
93.428	0.9667	0.964343	0.964356
93.55	0.9663	0.964143	0.964001
93.641	0.966	0.963882	0.963514
93.762	0.9655	0.963634	0.963175
93.853	0.9652	0.963456	0.962709
93.944	0.9649	0.963312	0.962229
94.066	0.9645	0.963067	0.962009
94.127	0.9642	0.962811	0.961659
94.245	0.9638	0.962608	0.961082
94.37	0.9633	0.962428	0.960849
94.431	0.9631	0.962156	0.960378
94.552	0.9627	0.961961	0.960017
94.644	0.9624	0.961725	0.959543
94.761	0.9619	0.961465	0.959206
94.887	0.9614	0.961359	0.958851
94.978	0.9611	0.961139	0.958471
95.039	0.9608		0.9581
			0.957644
			0.95726
			0.956878
	Ratio @ Ti		0.956529
	0.8944
	0.9215
	0.9476
	0.9387
	0.9057
	0.933
	0.9283
	0.9361
	0.9717

## Sheet: NCS1-2mMCaCl2
NCS1-2mM Ca	REPEAT 1	REPEAT 2	REPEAT 3
Temperature [°C]	Ratio 350 nm / 330 nm	Ratio 350 nm / 330 nm	Ratio 350 nm / 330 nm
35.133	0.810706	0.804493	0.801281
35.252	0.81066	0.804493	0.801286
35.401	0.810604	0.804494	0.801284
35.521	0.810559	0.804494	0.801297
35.64	0.81052	0.804495	0.801294
35.73	0.810487	0.804492	0.801304
35.849	0.810447	0.804494	0.801311
35.968	0.810401	0.804496	0.801314
36.088	0.81036	0.804492	0.80132
36.117	0.810344	0.804496	0.801323
36.237	0.810307	0.804494	0.801327
36.356	0.810265	0.804492	0.801334
36.475	0.810222	0.804491	0.801339
36.565	0.81019	0.804493	0.801342
36.654	0.810159	0.804494	0.801349
36.774	0.810115	0.804492	0.801354
36.833	0.810095	0.804489	0.801358
36.953	0.810053	0.804488	0.801367
37.102	0.810003	0.804488	0.80137
37.192	0.809969	0.804488	0.801377
37.251	0.809949	0.804487	0.80138
37.371	0.809906	0.804487	0.801387
37.464	0.809874	0.804484	0.801393
37.553	0.809843	0.804483	0.8014
37.609	0.809822	0.804483	0.801406
37.729	0.80978	0.804482	0.801412
37.878	0.809726	0.80448	0.80142
37.998	0.809683	0.804479	0.801425
38.087	0.80965	0.804478	0.801433
38.21	0.809605	0.804477	0.80144
38.296	0.809573	0.804476	0.801452
38.385	0.809539	0.804475	0.801467
38.475	0.809505	0.804475	0.801496
38.594	0.809458	0.804474	0.801514
38.654	0.809434	0.804474	0.801527
38.774	0.809391	0.804471	0.801545
38.863	0.809359	0.804471	0.801564
38.953	0.809326	0.80447	0.801588
39.042	0.809295	0.804469	0.801611
39.162	0.809256	0.804468	0.801623
39.251	0.809227	0.804467	0.801633
39.341	0.809198	0.804466	0.801655
39.431	0.809168	0.804465	0.801682
39.52	0.809139	0.804464	0.801697
39.703	0.809078	0.804462	0.801714
39.789	0.809049	0.804461	0.801726
39.908	0.809008	0.804459	0.801737
39.998	0.808978	0.804458	0.801745
40.088	0.808947	0.804457	0.801757
40.177	0.808915	0.804456	0.801765
40.267	0.808883	0.804454	0.801772
40.357	0.80885	0.804452	0.801783
40.476	0.808806	0.80445	0.801786
40.566	0.808773	0.804447	0.801793
40.659	0.808739	0.804444	0.801798
40.749	0.808705	0.804438	0.801792
40.835	0.808675	0.804433	0.801793
40.984	0.808621	0.804421	0.801791
41.077	0.80859	0.804414	0.801787
41.193	0.808556	0.804404	0.801779
41.253	0.808537	0.804398	0.801772
41.343	0.808512	0.804389	0.801767
41.496	0.80847	0.804374	0.801763
41.582	0.808448	0.804365	0.801761
41.701	0.808422	0.804352	0.80176
41.761	0.808412	0.804346	0.801758
41.881	0.808388	0.804332	0.801757
42	0.808363	0.804318	0.801754
42.09	0.808344	0.804307	0.801751
42.179	0.808326	0.804297	0.801748
42.299	0.8083	0.804283	0.801741
42.389	0.80828	0.804271	0.801734
42.478	0.808258	0.804261	0.801724
42.572	0.808235	0.80425	0.801709
42.658	0.808212	0.804239	0.801697
42.777	0.808178	0.804223	0.801684
42.897	0.808142	0.804209	0.80167
42.987	0.808115	0.804197	0.801661
43.136	0.808064	0.804177	0.801628
43.196	0.808047	0.804169	0.801612
43.256	0.808025	0.804161	0.801596
43.405	0.807973	0.804143	0.801575
43.465	0.807949	0.804133	0.801562
43.585	0.807905	0.804115	0.80155
43.674	0.807871	0.804103	0.801537
43.794	0.807824	0.804086	0.801524
43.944	0.807759	0.804062	0.801516
44.037	0.807723	0.804047	0.801507
44.123	0.807689	0.804034	0.801505
44.213	0.807652	0.804018	0.801503
44.273	0.807627	0.804009	0.801507
44.392	0.807579	0.803988	0.801513
44.482	0.807547	0.803972	0.80153
44.602	0.807495	0.803952	0.801531
44.691	0.807461	0.803935	0.80155
44.815	0.807404	0.803913	0.801583
44.904	0.807366	0.803897	0.801614
45.02	0.807319	0.803875	0.801628
45.08	0.807289	0.803864	0.801656
45.2	0.807235	0.803841	0.801673
45.32	0.80718	0.803816	0.801699
45.439	0.807124	0.803793	0.801713
45.499	0.807096	0.803781	0.801731
45.589	0.807048	0.803761	0.801759
45.682	0.807002	0.803739	0.801789
45.802	0.80694	0.803712	0.801806
45.918	0.806877	0.803686	0.80182
46.008	0.806827	0.803664	0.801844
46.128	0.806761	0.803635	0.801862
46.247	0.806695	0.803604	0.80188
46.277	0.806677	0.803597	0.801899
46.397	0.806613	0.803566	0.801931
46.487	0.806564	0.803542	0.801952
46.636	0.806478	0.803502	0.801982
46.726	0.806436	0.803478	0.802002
46.82	0.806387	0.803451	0.802024
46.936	0.806324	0.803417	0.802073
47.025	0.806283	0.803392	0.802101
47.115	0.806237	0.803366	0.802144
47.205	0.806195	0.803338	0.802179
47.265	0.806173	0.803321	0.802214
47.389	0.80612	0.803281	0.802244
47.538	0.806052	0.803237	0.802276
47.654	0.80601	0.803199	0.802314
47.748	0.805977	0.803169	0.802344
47.838	0.805947	0.803141	0.802371
47.928	0.805916	0.803112	0.802402
47.984	0.805901	0.803091	0.802423
48.074	0.805874	0.803062	0.802428
48.193	0.805838	0.803024	0.802444
48.343	0.805795	0.802975	0.802456
48.437	0.805771	0.802945	0.802456
48.523	0.80575	0.802916	0.802449
48.643	0.805722	0.802877	0.802437
48.763	0.805694	0.802837	0.802432
48.856	0.805672	0.802807	0.802417
48.916	0.805661	0.802788	0.802399
49.032	0.805634	0.802751	0.802386
49.185	0.805603	0.802702	0.802373
49.242	0.80559	0.802684	0.802368
49.332	0.805573	0.802655	0.802354
49.422	0.805556	0.802626	0.802344
49.541	0.805533	0.802589	0.802341
49.631	0.805516	0.80256	0.802339
49.721	0.805502	0.802532	0.802342
49.811	0.805489	0.802504	0.802342
49.961	0.805467	0.802456	0.802347
50.051	0.805454	0.802428	0.802351
50.141	0.805441	0.8024	0.802374
50.291	0.805421	0.802354	0.802387
50.35	0.805413	0.802335	0.8024
50.44	0.805401	0.802308	0.802414
50.534	0.805388	0.802279	0.802428
50.654	0.80537	0.802242	0.802441
50.744	0.805355	0.802214	0.802454
50.894	0.805327	0.802169	0.802476
50.984	0.80531	0.802141	0.802492
51.01	0.805306	0.802134	0.802503
51.134	0.805284	0.802096	0.802515
51.253	0.805261	0.80206	0.802522
51.373	0.805235	0.802024	0.802527
51.43	0.805221	0.802007	0.802534
51.579	0.805187	0.801961	0.802537
51.669	0.805167	0.801934	0.80254
51.763	0.805147	0.801904	0.802542
51.823	0.805134	0.801887	0.802549
51.939	0.805107	0.801851	0.802557
52.059	0.80508	0.801814	0.802565
52.149	0.805056	0.801786	0.802575
52.239	0.805035	0.801759	0.802593
52.359	0.805005	0.801722	0.802616
52.509	0.804963	0.801676	0.80265
52.599	0.80494	0.801648	0.802666
52.663	0.804924	0.801628	0.802693
52.779	0.804892	0.801593	0.802725
52.899	0.804856	0.801557	0.80276
52.992	0.804829	0.801529	0.80281
53.053	0.804812	0.801511	0.80285
53.143	0.804785	0.801484	0.802907
53.259	0.80475	0.80145	0.802951
53.379	0.804714	0.801415	0.80298
53.472	0.804687	0.801389	0.803023
53.589	0.804653	0.801357	0.803099
53.679	0.804628	0.801333	0.803142
53.769	0.804601	0.801308	0.803184
53.859	0.804578	0.801285	0.803231
53.983	0.804546	0.801253	0.803289
54.072	0.804523	0.801231	0.803357
54.189	0.804495	0.801203	0.803412
54.309	0.804473	0.801174	0.803451
54.373	0.804458	0.80116	0.803498
54.489	0.804435	0.801133	0.80354
54.583	0.804426	0.801112	0.803596
54.669	0.804411	0.801093	0.803638
54.759	0.8044	0.801074	0.80368
54.883	0.804389	0.801047	0.803737
54.999	0.804378	0.801023	0.803778
55.119	0.80437	0.800999	0.803839
55.179	0.804369	0.800986	0.803888
55.273	0.804364	0.800967	0.803921
55.393	0.804356	0.800944	0.803988
55.513	0.804354	0.800921	0.80404
55.569	0.804355	0.800911	0.804128
55.72	0.804356	0.800883	0.80417
55.78	0.804355	0.800871	0.804249
55.9	0.80436	0.80085	0.804331
56.02	0.804365	0.800831	0.804414
56.114	0.804372	0.800815	0.804456
56.204	0.80438	0.8008	0.804519
56.294	0.804387	0.800785	0.804582
56.38	0.804396	0.800773	0.804651
56.5	0.804409	0.80075	0.804731
56.59	0.804419	0.800737	0.804838
56.684	0.80443	0.800722	0.804876
56.804	0.804444	0.800702	0.804955
56.951	0.804461	0.80068	0.805039
57.015	0.804468	0.800671	0.805098
57.135	0.804483	0.800651	0.805159
57.255	0.804497	0.800635	0.805233
57.281	0.804501	0.80063	0.805247
57.405	0.804516	0.800612	0.805303
57.525	0.804532	0.800595	0.805403
57.615	0.804544	0.800583	0.805452
57.705	0.804557	0.800571	0.805483
57.825	0.804575	0.800552	0.805544
57.916	0.804586	0.800539	0.805589
58.006	0.804596	0.800527	0.80565
58.092	0.804608	0.800516	0.805697
58.216	0.804628	0.8005	0.805746
58.302	0.80464	0.800489	0.805814
58.453	0.804664	0.80047	0.805847
58.516	0.804673	0.800463	0.805921
58.693	0.804701	0.800445	0.80601
58.787	0.804716	0.800435	0.806108
58.877	0.804731	0.800425	0.806174
58.963	0.804744	0.800416	0.806278
59.054	0.804758	0.800407	0.806327
59.148	0.804774	0.800398	0.806423
59.234	0.804787	0.80039	0.806547
59.324	0.804801	0.800383	0.806671
59.444	0.80482	0.800372	0.806774
59.538	0.804834	0.800365	0.806846
59.628	0.804852	0.800358	0.807046
59.715	0.804866	0.800352	0.807158
59.809	0.80488	0.800346	0.807264
59.925	0.804897	0.80034	0.807378
60.079	0.804922	0.800333	0.80753
60.17	0.804936	0.800329	0.807688
60.29	0.804953	0.800326	0.807811
60.376	0.804965	0.800325	0.807927
60.467	0.804978	0.800323	0.808047
60.557	0.804992	0.800322	0.808169
60.621	0.805003	0.800322	0.808324
60.711	0.805018	0.800324	0.808527
60.831	0.805039	0.800326	0.808653
60.978	0.805067	0.80033	0.808776
61.072	0.805085	0.800333	0.808857
61.162	0.805105	0.800337	0.809018
61.248	0.805125	0.80034	0.809181
61.309	0.805142	0.800343	0.809304
61.432	0.805173	0.800351	0.809388
61.613	0.805224	0.800362	0.809545
61.703	0.805251	0.800368	0.80971
61.793	0.805279	0.800375	0.809868
61.884	0.80531	0.800382	0.80993
62.004	0.805349	0.800394	0.810051
62.064	0.805371	0.800398	0.810243
62.154	0.805403	0.800407	0.810384
62.275	0.805445	0.800419	0.810462
62.365	0.805477	0.800427	0.81059
62.485	0.80552	0.80044	0.810682
62.606	0.805563	0.800456	0.810737
62.696	0.805595	0.800464	0.81086
62.782	0.805625	0.800473	0.81096
62.846	0.805646	0.800486	0.81107
62.963	0.805685	0.800503	0.811185
63.023	0.805704	0.800512	0.811308
63.234	0.805769	0.800542	0.811384
63.328	0.805797	0.800557	0.811462
63.418	0.805825	0.800569	0.81151
63.478	0.805842	0.800579	0.81161
63.599	0.805877	0.800598	0.811686
63.685	0.805901	0.800612	0.81178
63.806	0.805938	0.800632	0.811849
63.87	0.805958	0.800644	0.811939
63.96	0.805992	0.800659	0.812022
64.076	0.806034	0.80068	0.812046
64.197	0.806081	0.800698	0.812106
64.321	0.806138	0.80072	0.812195
64.441	0.806195	0.800745	0.812293
64.528	0.806234	0.800763	0.812391
64.592	0.806268	0.800776	0.812485
64.679	0.806317	0.800797	0.812559
64.799	0.806387	0.800821	0.812638
64.923	0.806468	0.800852	0.81272
65.014	0.806522	0.800873	0.812816
65.104	0.806577	0.800898	0.812874
65.194	0.806636	0.800923	0.812955
65.281	0.806693	0.80095	0.813106
65.401	0.806773	0.800983	0.813195
65.556	0.806876	0.801035	0.813281
65.646	0.806937	0.801062	0.813404
65.733	0.806994	0.801092	0.813432
65.823	0.807052	0.801124	0.81356
65.917	0.807113	0.801161	0.813698
66.008	0.807171	0.801196	0.813845
66.098	0.807232	0.80123	0.813978
66.188	0.807288	0.801267	0.814128
66.335	0.807385	0.801325	0.814207
66.429	0.80745	0.801362	0.814363
66.55	0.807534	0.801411	0.814438
66.666	0.80762	0.801459	0.814602
66.727	0.807657	0.801484	0.814727
66.821	0.807724	0.801524	0.814894
66.881	0.807772	0.80155	0.815022
67.028	0.807888	0.801611	0.81515
67.152	0.807989	0.801662	0.815279
67.212	0.808041	0.801689	0.815493
67.333	0.808145	0.801739	0.815622
67.389	0.808193	0.801763	0.81575
67.57	0.808354	0.801838	0.815879
67.664	0.808439	0.801878	0.81605
67.755	0.808522	0.801915	0.816136
67.842	0.808603	0.801951	0.816305
67.932	0.808686	0.801988	0.816473
68.056	0.808802	0.802039	0.816601
68.143	0.808883	0.802075	0.816727
68.237	0.808969	0.802114	0.816897
68.297	0.809023	0.802138	0.817063
68.448	0.809163	0.8022	0.817105
68.569	0.809272	0.80225	0.817314
68.659	0.809352	0.802287	0.817439
68.75	0.809432	0.802323	0.817605
68.84	0.809509	0.80236	0.817729
68.961	0.809612	0.802409	0.817814
69.081	0.809713	0.802458	0.817981
69.141	0.809761	0.802483	0.818061
69.228	0.809832	0.802519	0.818269
69.383	0.809957	0.802583	0.818431
69.473	0.81003	0.802622	0.818602
69.563	0.810102	0.80266	0.818671
69.684	0.810199	0.802712	0.818827
69.744	0.810247	0.802739	0.818949
69.831	0.810318	0.802777	0.819099
69.986	0.810444	0.802845	0.819211
70.076	0.810517	0.802887	0.819325
70.163	0.810589	0.802928	0.819402
70.287	0.810692	0.802987	0.819555
70.348	0.810742	0.803017	0.81967
70.468	0.810841	0.803075	0.819866
70.589	0.810942	0.803134	0.819984
70.71	0.81104	0.803194	0.820142
70.796	0.811107	0.803238	0.820266
70.921	0.811205	0.803302	0.820391
70.981	0.811251	0.803332	0.820516
71.102	0.811349	0.803394	0.820644
71.219	0.811435	0.803455	0.820809
71.283	0.811484	0.803488	0.820895
71.373	0.811547	0.803535	0.821071
71.524	0.81166	0.803614	0.821204
71.615	0.811728	0.803661	0.821434
71.705	0.811796	0.803708	0.821606
71.826	0.811888	0.803772	0.8217
71.913	0.811957	0.803817	0.82189
72.007	0.812027	0.803866	0.822029
72.128	0.812122	0.803929	0.822169
72.218	0.812194	0.803976	0.822307
72.275	0.812241	0.804006	0.822505
72.366	0.812321	0.804052	0.822689
72.49	0.812427	0.804116	0.822845
72.58	0.812504	0.804162	0.822992
72.701	0.812609	0.804223	0.82314
72.822	0.812718	0.804284	0.823345
72.912	0.812798	0.804329	0.823486
73.063	0.812939	0.804405	0.823589
73.124	0.812994	0.804435	0.823792
73.245	0.813107	0.804495	0.823895
73.331	0.81319	0.804538	0.824153
73.422	0.813277	0.804582	0.824359
73.482	0.813335	0.804613	0.82457
73.607	0.813454	0.804674	0.824731
73.728	0.813571	0.804734	0.824895
73.848	0.813687	0.804794	0.825065
73.939	0.813776	0.804841	0.825237
74.03	0.813862	0.804887	0.825352
74.151	0.81398	0.804947	0.825593
74.211	0.81404	0.80498	0.825844
74.301	0.814128	0.805026	0.826101
74.453	0.814275	0.805106	0.826288
74.543	0.814366	0.805154	0.826486
74.634	0.814458	0.805203	0.826676
74.754	0.814579	0.80527	0.826879
74.815	0.814642	0.805303	0.827143
74.966	0.814798	0.805388	0.827404
75.056	0.81489	0.80544	0.827668
75.177	0.815017	0.80551	0.827802
75.238	0.815081	0.805545	0.828076
75.359	0.815209	0.805617	0.828336
75.449	0.815305	0.805671	0.82854
75.54	0.815404	0.805725	0.828797
75.661	0.815536	0.805798	0.828913
75.751	0.815635	0.805853	0.829101
75.842	0.815735	0.805908	0.829285
75.993	0.815899	0.806001	0.829584
76.114	0.816033	0.806076	0.829769
76.201	0.816128	0.806129	0.830004
76.295	0.816231	0.806187	0.830227
76.386	0.81633	0.806244	0.830326
76.477	0.816427	0.806301	0.83048
76.567	0.816522	0.806357	0.830646
76.658	0.816617	0.806416	0.830787
76.748	0.81671	0.806473	0.830955
76.869	0.816833	0.806551	0.831158
76.991	0.816955	0.806632	0.831362
77.081	0.817044	0.806691	0.831548
77.172	0.817134	0.806752	0.831691
77.262	0.817222	0.806811	0.831839
77.383	0.817341	0.806894	0.831925
77.504	0.817461	0.806982	0.832154
77.565	0.817523	0.807028	0.832283
77.716	0.817676	0.807134	0.832427
77.807	0.817771	0.807203	0.832613
77.928	0.817896	0.807297	0.832708
77.988	0.817958	0.807341	0.832897
78.109	0.818088	0.807434	0.832993
78.2	0.818187	0.807504	0.833244
78.291	0.818288	0.807577	0.83344
78.381	0.818386	0.807645	0.833545
78.472	0.81849	0.80772	0.833695
78.593	0.818626	0.807815	0.833907
78.744	0.818799	0.807939	0.834112
78.805	0.81887	0.807987	0.834257
78.956	0.819049	0.808114	0.834407
79.016	0.819117	0.808161	0.834605
79.107	0.819224	0.808239	0.834644
79.198	0.819331	0.808312	0.834902
79.288	0.819435	0.808388	0.835088
79.409	0.819578	0.808489	0.835243
79.53	0.819721	0.80859	0.835321
79.652	0.819867	0.808693	0.835481
79.742	0.819975	0.808767	0.835679
79.833	0.820087	0.808844	0.835917
79.924	0.820198	0.80892	0.836143
80.015	0.82031	0.808996	0.836369
80.136	0.820462	0.809097	0.836615
80.226	0.820574	0.809173	0.836792
80.317	0.820689	0.809249	0.83693
80.378	0.820766	0.809299	0.837103
80.559	0.820992	0.80945	0.837357
80.65	0.821106	0.809525	0.837548
80.771	0.82126	0.809625	0.837685
80.832	0.821337	0.809673	0.837944
80.953	0.82149	0.809774	0.838214
81.013	0.821567	0.809822	0.838491
81.134	0.821722	0.80992	0.838699
81.255	0.821877	0.81002	0.838911
81.346	0.821995	0.810094	0.839123
81.437	0.822114	0.810168	0.83934
81.498	0.822194	0.810215	0.839612
81.619	0.822354	0.810315	0.839828
81.77	0.822557	0.810441	0.840169
81.891	0.822721	0.81054	0.840161
81.952	0.822805	0.81059	0.840566
82.073	0.822971	0.81069	0.840759
82.164	0.823096	0.810765	0.841007
82.285	0.823264	0.810866	0.841178
82.345	0.823347	0.810917	0.841361
82.466	0.823515	0.81102	0.841522
82.557	0.823641	0.811098	0.841679
82.682	0.823817	0.811205	0.841874
82.769	0.823938	0.81128	0.842027
82.83	0.824027	0.811332	0.842169
82.951	0.824195	0.811438	0.842346
83.072	0.824364	0.811545	0.842462
83.193	0.824533	0.811653	0.842582
83.284	0.824659	0.811735	0.842709
83.405	0.824828	0.811845	0.842874
83.466	0.824912	0.811901	0.84303
83.56	0.825043	0.811988	0.843156
83.678	0.825206	0.812098	0.84328
83.799	0.825373	0.812215	0.843452
83.92	0.82554	0.812335	0.843587
83.981	0.825624	0.812397	0.843721
84.102	0.825791	0.812517	0.84386
84.193	0.825914	0.812608	0.843998
84.284	0.826039	0.812701	0.844147
84.405	0.826201	0.812826	0.844284
84.496	0.826324	0.81292	0.844483
84.617	0.826481	0.813054	0.844694
84.678	0.826566	0.813122	0.844948
84.769	0.826682	0.813219	0.845124
84.89	0.826846	0.813362	0.845327
85.011	0.827008	0.813501	0.845454
85.132	0.827168	0.813646	0.84567
85.196	0.827257	0.813726	0.845855
85.314	0.827417	0.813862	0.846027
85.405	0.827542	0.813981	0.846235
85.556	0.827754	0.814196	0.846432
85.617	0.827838	0.814269	0.846705
85.708	0.82797	0.814398	0.846921
85.833	0.828154	0.814575	0.84714
85.89	0.828245	0.814672	0.847373
86.011	0.828431	0.81485	0.847612
86.071	0.828524	0.814947	0.848031
86.223	0.828765	0.815164	0.848191
86.314	0.828914	0.815342	0.848462
86.47	0.829184	0.815605	0.848724
86.557	0.829336	0.815743	0.849239
86.648	0.829492	0.815923	0.84964
86.769	0.829714	0.81615	0.849935
86.83	0.829819	0.816244	0.850342
86.924	0.83001	0.816442	0.850588
87.012	0.830184	0.816623	0.85106
87.163	0.830501	0.816959	0.851421
87.254	0.830682	0.817141	0.851767
87.345	0.830866	0.817319	0.852259
87.467	0.83114	0.817589	0.852508
87.557	0.831365	0.817812	0.853027
87.649	0.831575	0.818021	0.85353
87.774	0.831908	0.818337	0.853806
87.834	0.832049	0.81849	0.854332
87.952	0.832387	0.818784	0.854891
88.043	0.832629	0.819011	0.855301
88.138	0.83292	0.819273	0.855576
88.225	0.833187	0.81951	0.856324
88.38	0.833697	0.819931	0.856753
88.468	0.833968	0.820191	0.857221
88.589	0.834384	0.820537	0.857645
88.68	0.834695	0.820789	0.858277
88.771	0.835045	0.821045	0.858603
88.862	0.835376	0.821324	0.85925
88.983	0.835872	0.821697	0.859734
89.044	0.836126	0.821901	0.860546
89.135	0.8365	0.822187	0.860887
89.256	0.837024	0.822562	0.861401
89.347	0.837425	0.822886	0.86209
89.503	0.83815	0.823375	0.862627
89.621	0.838702	0.823824	0.863311
89.712	0.839144	0.824173	0.863698
89.807	0.839591	0.824538	0.864439
89.894	0.840025	0.824874	0.865012
89.954	0.840318	0.825106	0.865754
90.079	0.840965	0.82559	0.866498
90.197	0.841592	0.826047	0.866868
90.288	0.842086	0.826399	0.867482
90.353	0.842453	0.826651	0.868304
90.501	0.84327	0.827225	0.869107
90.592	0.843784	0.827578	0.869872
90.713	0.844463	0.828047	0.870495
90.808	0.845012	0.828416	0.871115
90.869	0.845379	0.828653	0.871746
90.987	0.846078	0.829112	0.872564
91.078	0.846622	0.829466	0.872973
91.199	0.847345	0.829938	0.873613
91.321	0.848093	0.830413	0.874239
91.385	0.848509	0.830662	0.875314
91.533	0.849431	0.831241	0.87574
91.598	0.849859	0.831496	0.876604
91.715	0.850632	0.831954	0.877469
91.807	0.851243	0.832316	0.87812
91.962	0.852275	0.832923	0.878767
92.019	0.852655	0.833146	0.879437
92.141	0.853468	0.833627	0.880255
92.235	0.854096	0.833997	0.880889
92.323	0.854683	0.834347	0.881529
92.414	0.855291	0.834705	0.882162
92.536	0.856106	0.835186	0.883002
92.631	0.856742	0.835564	0.883849
92.748	0.857526	0.83603	0.884482
92.843	0.858161	0.83641	0.885115
92.934	0.858771	0.836768	0.885962
93.025	0.859381	0.837134	0.886595
93.116	0.85999	0.837493	0.887231
93.234	0.860784	0.837965	0.887863
93.329	0.861422	0.838348	0.888729
93.451	0.862242	0.838832	0.889343
93.511	0.862642	0.839072	0.890183
93.633	0.863464	0.839565	0.89106
93.751	0.864252	0.840039	0.891453
93.846	0.864899	0.840424	0.892088
93.937	0.8655	0.840786	0.893147
94.028	0.866125	0.841154	0.893566
94.146	0.866918	0.841628	0.894403
94.268	0.86774	0.842122	0.89504
94.329	0.868146	0.842372	0.895874
94.45	0.868962	0.842863	0.896511
94.575	0.869812	0.843377	0.897134
94.666	0.87043	0.843745	0.897763
94.754	0.871021	0.844107	0.898403
94.845	0.871635	0.844474	0.899236
94.997	0.872667	0.845095	0.899853
95.062	0.873103	0.845363	0.900478
		0	0.901111
	Ti [°C]

## Sheet: Ric8
Ric-8A-452	REPEAT 1	REPEAT 2	REPEAT 3
Temperature [°C]	Ratio 350 nm / 330 nm	Ratio 350 nm / 330 nm	Ratio 350 nm / 330 nm
35.111	0.631593	0.63255	0.634527
35.23	0.631484	0.632534	0.634386
35.32	0.631411	0.632524	0.634275
35.495	0.631264	0.63249	0.634065
35.618	0.631159	0.632469	0.63391
35.734	0.631058	0.632445	0.633767
35.823	0.630985	0.632417	0.633654
35.917	0.630903	0.632393	0.633532
36.036	0.6308	0.632353	0.633377
36.125	0.630721	0.632322	0.633265
36.215	0.630641	0.632289	0.633147
36.334	0.630534	0.632245	0.632992
36.424	0.63045	0.632213	0.632874
36.543	0.630334	0.632172	0.632716
36.633	0.630242	0.632141	0.632596
36.722	0.63015	0.632071	0.632476
36.812	0.63005	0.632006	0.632351
36.901	0.629958	0.631942	0.632224
37.02	0.629817	0.631829	0.632041
37.106	0.62971	0.631738	0.631906
37.229	0.629546	0.631582	0.631712
37.315	0.62943	0.631463	0.631579
37.464	0.62923	0.631242	0.631343
37.532	0.629139	0.631136	0.631237
37.651	0.628979	0.630944	0.631045
37.707	0.628907	0.630849	0.630953
37.796	0.628785	0.630697	0.630809
37.946	0.628569	0.630418	0.630574
38.061	0.628408	0.630205	0.6304
38.151	0.628292	0.630046	0.630275
38.274	0.628129	0.629818	0.630092
38.364	0.628017	0.62965	0.62997
38.42	0.62795	0.629543	0.629888
38.539	0.627789	0.629322	0.629731
38.662	0.627603	0.629085	0.629568
38.752	0.627466	0.628903	0.629455
38.871	0.627265	0.628657	0.629306
38.957	0.62711	0.628477	0.629193
39.054	0.626934	0.628271	0.629066
39.14	0.626773	0.628089	0.628949
39.229	0.626611	0.627907	0.628821
39.349	0.626399	0.627666	0.628646
39.439	0.626243	0.627489	0.628491
39.558	0.626032	0.627275	0.62828
39.618	0.625927	0.627169	0.628169
39.734	0.625719	0.626979	0.62795
39.827	0.62556	0.626831	0.627776
39.946	0.62535	0.626641	0.627542
40.096	0.625068	0.6264	0.627248
40.155	0.624972	0.626303	0.627133
40.275	0.624753	0.626103	0.626904
40.364	0.624609	0.625956	0.626738
40.45	0.624485	0.625809	0.626581
40.54	0.624366	0.625653	0.626415
40.633	0.624254	0.625493	0.626241
40.753	0.624118	0.625284	0.626012
40.872	0.623979	0.625077	0.625789
40.962	0.623866	0.624924	0.625603
41.051	0.623745	0.624766	0.62545
41.171	0.623567	0.624539	0.625225
41.261	0.62342	0.624365	0.625074
41.35	0.62328	0.624196	0.624921
41.466	0.623093	0.623959	0.624729
41.56	0.622926	0.623772	0.624584
41.649	0.622772	0.623593	0.624443
41.739	0.622606	0.62341	0.624312
41.858	0.622378	0.623168	0.624149
41.974	0.622148	0.622937	0.624
42.038	0.622023	0.62281	0.623926
42.157	0.621782	0.622585	0.623791
42.277	0.621542	0.62236	0.623653
42.397	0.621309	0.622135	0.623509
42.453	0.621203	0.622036	0.623429
42.576	0.620981	0.62183	0.623255
42.695	0.620766	0.621636	0.623086
42.815	0.620564	0.621461	0.622899
42.815	0.620564	0.621461	0.622899
42.964	0.620345	0.621262	0.622657
43.054	0.620205	0.621145	0.622513
43.204	0.619969	0.620962	0.62226
43.264	0.619875	0.62089	0.622156
43.443	0.61959	0.620679	0.621856
43.533	0.619447	0.62057	0.621707
43.648	0.619266	0.620422	0.621516
43.742	0.619125	0.620297	0.621363
43.802	0.619012	0.620201	0.621264
43.891	0.618861	0.620066	0.621113
43.981	0.618699	0.619916	0.620959
44.071	0.618533	0.619778	0.620803
44.157	0.618357	0.61964	0.620649
44.25	0.618132	0.619484	0.620481
44.4	0.61779	0.619198	0.620205
44.52	0.617508	0.618975	0.619978
44.609	0.617298	0.6188	0.619814
44.729	0.617025	0.618569	0.619592
44.789	0.616887	0.618446	0.619481
44.879	0.616694	0.618264	0.619312
44.968	0.616505	0.618076	0.619148
45.088	0.616263	0.617824	0.618934
45.208	0.616034	0.617583	0.618722
45.297	0.615861	0.617413	0.618575
45.384	0.615696	0.617244	0.618429
45.507	0.615476	0.617012	0.618219
45.626	0.615259	0.616788	0.618007
45.687	0.615152	0.616679	0.617896
45.806	0.614948	0.616474	0.617672
45.926	0.614755	0.616274	0.617446
46.016	0.614621	0.616125	0.617277
46.135	0.614456	0.615929	0.617056
46.195	0.614381	0.615827	0.616956
46.285	0.614265	0.615681	0.616791
46.375	0.614152	0.61554	0.616634
46.494	0.614004	0.615377	0.616448
46.644	0.613821	0.615192	0.616211
46.734	0.613715	0.6151	0.616076
46.824	0.613609	0.615021	0.615942
46.94	0.61347	0.614906	0.615774
47.03	0.61336	0.614815	0.615639
47.123	0.613248	0.614724	0.615501
47.179	0.613185	0.614667	0.615416
47.273	0.613085	0.614563	0.615276
47.393	0.612968	0.614422	0.615098
47.512	0.612856	0.614273	0.614927
47.662	0.612713	0.614093	0.614723
47.752	0.612626	0.613988	0.614614
47.842	0.612535	0.613898	0.614514
47.932	0.612443	0.613806	0.614429
48.021	0.612345	0.613724	0.614342
48.141	0.612214	0.613617	0.614253
48.231	0.612138	0.613542	0.614189
48.351	0.612038	0.613446	0.614102
48.441	0.611998	0.613374	0.614046
48.501	0.611965	0.613318	0.614005
48.59	0.611946	0.613241	0.613956
48.68	0.611925	0.613178	0.61391
48.83	0.611913	0.613071	0.613848
48.92	0.611921	0.613034	0.613815
49.07	0.611951	0.612957	0.613797
49.16	0.611998	0.612951	0.613799
49.279	0.612081	0.612953	0.613809
49.339	0.612143	0.612966	0.613838
49.459	0.612256	0.613	0.613919
49.515	0.612303	0.613016	0.613954
49.639	0.612451	0.613067	0.614115
49.729	0.61256	0.613112	0.614239
49.849	0.612718	0.61319	0.614444
49.938	0.612848	0.613268	0.614599
50.054	0.613041	0.613418	0.614806
50.148	0.613232	0.613575	0.614998
50.238	0.613412	0.613715	0.6152
50.328	0.613621	0.613873	0.615424
50.448	0.613914	0.614176	0.615784
50.538	0.614179	0.61441	0.616091
50.654	0.614569	0.614822	0.616515
50.748	0.614933	0.615196	0.616814
50.868	0.615443	0.615776	0.617312
50.987	0.616004	0.616412	0.617863
51.077	0.616529	0.616939	0.618292
51.137	0.616818	0.617219	0.618586
51.227	0.617335	0.617769	0.619144
51.343	0.618061	0.618528	0.619869
51.467	0.618945	0.619422	0.62075
51.587	0.61986	0.620333	0.62165
51.711	0.620936	0.621393	0.622493
51.77	0.621528	0.621914	0.62299
51.887	0.622595	0.622998	0.623998
51.947	0.623224	0.623576	0.624483
52.037	0.624125	0.624468	0.625283
52.127	0.625106	0.625366	0.626124
52.246	0.626375	0.626654	0.627323
52.367	0.627758	0.628007	0.628579
52.516	0.62955	0.62977	0.630154
52.636	0.631069	0.631262	0.631579
52.696	0.631817	0.631998	0.632363
52.786	0.632984	0.633207	0.633438
52.936	0.634974	0.635193	0.635328
52.966	0.635403	0.635628	0.635719
53.056	0.636637	0.636849	0.636935
53.206	0.63883	0.638977	0.63894
53.266	0.639678	0.639837	0.639787
53.386	0.641472	0.641578	0.641451
53.536	0.643698	0.643788	0.64353
53.566	0.64415	0.64423	0.643956
53.656	0.645487	0.645567	0.645258
53.806	0.647707	0.647796	0.647411
53.896	0.649023	0.649114	0.648692
54.016	0.650753	0.650841	0.650402
54.073	0.651567	0.651678	0.651186
54.162	0.652829	0.652906	0.652427
54.286	0.654585	0.654559	0.654128
54.376	0.655776	0.655786	0.655403
54.526	0.657836	0.657649	0.65736
54.646	0.659348	0.659096	0.658932
54.736	0.660461	0.660152	0.660008
54.826	0.66154	0.661164	0.661126
54.916	0.662582	0.662178	0.662123
55.01	0.663605	0.663236	0.663173
55.097	0.664531	0.664113	0.664094
55.187	0.665474	0.665075	0.664968
55.307	0.666619	0.666264	0.666135
55.397	0.667424	0.667109	0.667044
55.517	0.668436	0.668168	0.668006
55.607	0.669101	0.668892	0.668743
55.697	0.669822	0.669605	0.669472
55.817	0.670709	0.670502	0.67036
55.877	0.671188	0.670951	0.670761
55.997	0.671991	0.671797	0.671476
56.117	0.672695	0.672578	0.672168
56.207	0.673197	0.673131	0.672628
56.327	0.673824	0.673795	0.673245
56.418	0.674192	0.674319	0.673717
56.508	0.674588	0.674758	0.674158
56.628	0.675055	0.675338	0.674672
56.688	0.675276	0.675615	0.674948
56.808	0.675684	0.676141	0.675429
56.898	0.675993	0.676513	0.675787
57.048	0.676455	0.677104	0.676329
57.138	0.676718	0.677434	0.67666
57.228	0.676964	0.67775	0.676943
57.348	0.677289	0.67816	0.677317
57.439	0.677526	0.678442	0.677554
57.529	0.67775	0.678726	0.677799
57.619	0.677964	0.678968	0.678037
57.679	0.678099	0.679136	0.678199
57.833	0.678447	0.679506	0.678594
57.889	0.678575	0.679653	0.678732
58.009	0.678859	0.679922	0.679034
58.129	0.679154	0.680188	0.679335
58.25	0.679446	0.680459	0.679633
58.34	0.679663	0.680596	0.679851
58.43	0.679866	0.680743	0.680066
58.52	0.680068	0.680891	0.680285
58.64	0.680331	0.681028	0.680557
58.761	0.68059	0.681152	0.680838
58.851	0.680775	0.681247	0.681031
58.971	0.681005	0.681353	0.68126
59.001	0.681068	0.681377	0.681325
59.121	0.681249	0.681478	0.681533
59.211	0.681409	0.681556	0.681678
59.362	0.681595	0.681679	0.681879
59.482	0.681713	0.681776	0.682024
59.572	0.681807	0.681851	0.682125
59.662	0.681902	0.681925	0.682223
59.692	0.681937	0.681953	0.682267
59.842	0.682104	0.682076	0.682375
59.933	0.682212	0.682152	0.682471
60.053	0.682358	0.682252	0.682572
60.173	0.682496	0.68236	0.68267
60.293	0.682638	0.682471	0.682744
60.383	0.682734	0.682564	0.682765
60.444	0.682795	0.682629	0.682787
60.564	0.682904	0.682763	0.682821
60.654	0.682976	0.682866	0.682834
60.744	0.683045	0.682967	0.682844
60.895	0.683145	0.683131	0.682861
60.985	0.683218	0.683221	0.682885
61.075	0.683309	0.683317	0.682906
61.165	0.683387	0.683406	0.682927
61.256	0.683476	0.683495	0.682949
61.376	0.68359	0.683607	0.68299
61.47	0.683673	0.68369	0.683026
61.556	0.683738	0.683771	0.683059
61.707	0.683835	0.683905	0.683119
61.797	0.683877	0.683948	0.683153
61.917	0.683946	0.684022	0.683207
61.981	0.683984	0.684056	0.683237
62.068	0.684027	0.684111	0.683272
62.158	0.684073	0.684163	0.683314
62.308	0.684163	0.684249	0.683352
62.399	0.684214	0.684299	0.683376
62.459	0.684252	0.684333	0.683397
62.579	0.684313	0.684393	0.683411
62.669	0.684359	0.684431	0.683422
62.794	0.684406	0.68448	0.683444
62.94	0.684451	0.684529	0.683448
63.03	0.684459	0.684566	0.683448
63.091	0.684458	0.684601	0.683439
63.154	0.684454	0.684621	0.683444
63.305	0.684443	0.6847	0.683447
63.425	0.684459	0.684773	0.683451
63.512	0.684488	0.684818	0.683457
63.602	0.684553	0.684873	0.683453
63.662	0.68456	0.68491	0.683448
63.786	0.684647	0.684988	0.683447
63.843	0.684683	0.685019	0.683446
63.994	0.684788	0.685106	0.683464
64.114	0.684865	0.685171	0.683475
64.234	0.684942	0.685233	0.683494
64.325	0.684996	0.68528	0.683516
64.415	0.685045	0.685321	0.683539
64.509	0.685087	0.685361	0.683578
64.629	0.685148	0.6854	0.683646
64.659	0.685172	0.685412	0.683658
64.75	0.685209	0.685443	0.68374
64.87	0.685269	0.685489	0.683854
65.017	0.685313	0.68554	0.684018
65.107	0.685316	0.685574	0.684115
65.198	0.685311	0.685604	0.684212
65.348	0.685278	0.685647	0.684381
65.469	0.685244	0.685687	0.684513
65.529	0.685228	0.685694	0.684572
65.619	0.685201	0.685711	0.684656
65.71	0.685188	0.685727	0.684743
65.834	0.685192	0.685737	0.684845
65.921	0.685202	0.685748	0.684911
66.041	0.685229	0.685773	0.685002
66.161	0.685269	0.6858	0.685093
66.256	0.685309	0.685834	0.685135
66.316	0.685349	0.685863	0.685169
66.406	0.685387	0.685899	0.685221
66.523	0.685492	0.685947	0.685286
66.643	0.685584	0.685988	0.685339
66.764	0.685732	0.68602	0.685396
66.884	0.685865	0.686041	0.685448
66.945	0.68593	0.686051	0.685462
67.035	0.68602	0.686049	0.68549
67.125	0.68611	0.68605	0.685499
67.246	0.686233	0.686057	0.685508
67.336	0.686321	0.686072	0.685503
67.457	0.686429	0.686107	0.685503
67.581	0.68654	0.686153	0.685494
67.671	0.686582	0.686187	0.685491
67.762	0.686638	0.686225	0.68549
67.852	0.686639	0.686261	0.685494
67.939	0.686677	0.686291	0.685503
67.999	0.686702	0.686297	0.685515
68.15	0.686711	0.686354	0.685548
68.274	0.686696	0.686398	0.685585
68.391	0.686671	0.68649	0.68562
68.451	0.686681	0.686539	0.685643
68.576	0.68668	0.686665	0.685685
68.693	0.686691	0.686777	0.685738
68.787	0.686706	0.686866	0.685783
68.874	0.686726	0.68694	0.685822
68.934	0.686741	0.686998	0.685847
69.054	0.686779	0.687085	0.685895
69.115	0.686797	0.687133	0.685917
69.295	0.686832	0.687203	0.685977
69.386	0.686857	0.68724	0.686002
69.476	0.686889	0.687271	0.686027
69.567	0.686928	0.687304	0.686051
69.657	0.686975	0.687337	0.686075
69.748	0.687029	0.687372	0.6861
69.929	0.687104	0.68744	0.68616
69.989	0.687118	0.68745	0.686183
70.113	0.687154	0.687469	0.686233
70.204	0.687179	0.687462	0.686275
70.294	0.687214	0.687453	0.686318
70.381	0.687257	0.687443	0.686362
70.445	0.687273	0.687436	0.686388
70.562	0.687353	0.68743	0.686442
70.713	0.68745	0.687444	0.686511
70.803	0.687531	0.687481	0.686552
70.894	0.687627	0.687527	0.686591
70.988	0.687725	0.687587	0.686629
71.075	0.687818	0.68765	0.686668
71.196	0.687938	0.687742	0.686714
71.29	0.688027	0.68781	0.686756
71.407	0.688122	0.687882	0.686816
71.528	0.688226	0.687975	0.68689
71.588	0.688274	0.688027	0.686935
71.712	0.688385	0.688162	0.687025
71.833	0.688511	0.688285	0.687126
71.92	0.688598	0.688387	0.687202
72.01	0.688675	0.688488	0.68728
72.101	0.688754	0.688589	0.687356
72.195	0.688812	0.688703	0.687429
72.316	0.688851	0.68884	0.687512
72.403	0.688863	0.688937	0.687566
72.523	0.688868	0.689052	0.687636
72.618	0.688858	0.689126	0.687691
72.738	0.688859	0.689185	0.687745
72.825	0.688874	0.689231	0.687781
72.889	0.688885	0.689277	0.687807
73.006	0.688937	0.689332	0.687853
73.127	0.689002	0.689376	0.687901
73.218	0.689054	0.689409	0.687935
73.308	0.689126	0.68944	0.687971
73.433	0.689229	0.68947	0.68801
73.55	0.689306	0.689498	0.688044
73.614	0.68935	0.689507	0.688061
73.731	0.689413	0.689532	0.688093
73.855	0.689484	0.68955	0.68813
73.916	0.689521	0.689566	0.688148
74.033	0.689613	0.689603	0.688194
74.123	0.689699	0.689646	0.688216
74.278	0.689849	0.689752	0.68828
74.369	0.689923	0.68982	0.688311
74.486	0.690033	0.689909	0.688366
74.546	0.690069	0.689956	0.6884
74.64	0.690142	0.690041	0.688437
74.727	0.690176	0.690122	0.688476
74.848	0.690209	0.690237	0.688538
74.939	0.690225	0.690321	0.688585
75.09	0.690249	0.690448	0.688674
75.181	0.690268	0.690502	0.688737
75.275	0.690287	0.690551	0.688807
75.362	0.690306	0.690589	0.688881
75.452	0.690329	0.690621	0.688953
75.547	0.690357	0.690651	0.689037
75.664	0.690399	0.69069	0.689142
75.785	0.690453	0.690698	0.689257
75.875	0.690502	0.6907	0.689344
75.97	0.690559	0.690696	0.689437
75.996	0.690574	0.690685	0.689463
76.117	0.690646	0.690652	0.689575
76.211	0.690705	0.690622	0.68966
76.363	0.690811	0.690561	0.689775
76.483	0.690898	0.690524	0.689844
76.574	0.69097	0.690494	0.68988
76.695	0.691064	0.69048	0.689914
76.786	0.691133	0.690502	0.689944
76.903	0.691208	0.690519	0.689977
76.963	0.691235	0.690553	0.69
77.058	0.691287	0.690592	0.690025
77.145	0.691333	0.690634	0.690053
77.3	0.691353	0.690728	0.690105
77.421	0.691372	0.690818	0.690143
77.541	0.69139	0.690914	0.690174
77.632	0.691404	0.690983	0.690199
77.693	0.691413	0.691028	0.690215
77.813	0.69143	0.69111	0.690251
77.874	0.691446	0.691142	0.690264
77.995	0.691478	0.691218	0.690305
78.055	0.691486	0.691248	0.690325
78.176	0.691525	0.691347	0.690357
78.297	0.691552	0.691412	0.690405
78.388	0.691597	0.691467	0.690431
78.509	0.691664	0.691508	0.690483
78.66	0.691779	0.691561	0.690535
78.721	0.691833	0.691579	0.690563
78.811	0.691945	0.691609	0.69061
78.932	0.692091	0.691654	0.69067
78.993	0.69217	0.691662	0.690703
79.053	0.692241	0.6917	0.690736
79.17	0.692386	0.691757	0.690808
79.291	0.692496	0.691829	0.69088
79.443	0.692619	0.691938	0.690987
79.598	0.692693	0.692057	0.691104
79.658	0.692732	0.692098	0.691151
79.749	0.692762	0.692158	0.691225
79.84	0.692808	0.692219	0.6913
79.93	0.692857	0.692276	0.691377
80.051	0.692912	0.692347	0.691476
80.082	0.692926	0.692373	0.691511
80.233	0.692948	0.692451	0.691643
80.324	0.692957	0.692505	0.691718
80.445	0.692976	0.692579	0.691818
80.536	0.692993	0.692641	0.691885
80.596	0.69305	0.692686	0.691928
80.717	0.693128	0.692767	0.692005
80.778	0.69314	0.692807	0.692043
80.899	0.69323	0.692891	0.692108
81.05	0.693427	0.692988	0.69219
81.202	0.69362	0.693094	0.692269
81.292	0.693747	0.693177	0.692311
81.353	0.69384	0.693238	0.692336
81.44	0.693961	0.69332	0.692391
81.565	0.694136	0.693448	0.692402
81.655	0.694255	0.693555	0.692419
81.746	0.694361	0.693661	0.69243
81.837	0.694471	0.693772	0.692436
81.898	0.694533	0.693839	0.692448
82.049	0.694644	0.694006	0.69245
82.144	0.694725	0.694074	0.692461
82.227	0.694771	0.694141	0.69247
82.378	0.694872	0.694223	0.692505
82.503	0.694921	0.69428	0.69252
82.56	0.694932	0.694299	0.692562
82.654	0.69494	0.694347	0.692578
82.776	0.694938	0.694411	0.692633
82.867	0.694932	0.694466	0.692644
82.957	0.694927	0.694523	0.692677
83.048	0.69492	0.694579	0.692704
83.2	0.694903	0.694679	0.692762
83.29	0.694894	0.694721	0.692791
83.442	0.69487	0.694803	0.692852
83.502	0.694868	0.694822	0.692871
83.624	0.694877	0.694882	0.692922
83.684	0.694893	0.694924	0.692947
83.775	0.694917	0.694978	0.692993
83.862	0.694948	0.69504	0.693042
83.957	0.694997	0.695128	0.693105
84.078	0.695063	0.695276	0.693184
84.23	0.695136	0.695462	0.693296
84.321	0.695184	0.695571	0.693364
84.411	0.695232	0.695657	0.693428
84.533	0.695305	0.695763	0.693512
84.623	0.695363	0.695801	0.693566
84.745	0.695454	0.695824	0.69362
84.775	0.695478	0.695807	0.693638
84.896	0.695576	0.695793	0.693686
84.987	0.695655	0.695759	0.693729
85.108	0.695749	0.695738	0.69377
85.23	0.695841	0.69573	0.693834
85.29	0.695873	0.69573	0.693858
85.412	0.695939	0.695741	0.693964
85.533	0.695975	0.695757	0.694069
85.624	0.695994	0.69577	0.694154
85.714	0.696009	0.695774	0.694233
85.805	0.69602	0.695778	0.694312
85.927	0.696035	0.695776	0.694424
85.987	0.696042	0.69576	0.694472
86.109	0.696058	0.695758	0.694573
86.2	0.696071	0.695749	0.694632
86.321	0.696094	0.69576	0.694694
86.442	0.696115	0.695787	0.694756
86.533	0.696136	0.695824	0.694789
86.624	0.696147	0.695873	0.694829
86.715	0.696176	0.695935	0.694853
86.806	0.696194	0.695975	0.694886
86.927	0.696243	0.696027	0.694921
87.048	0.696311	0.696057	0.694951
87.139	0.696372	0.696063	0.694963
87.261	0.696453	0.69605	0.694976
87.321	0.696495	0.696036	0.69498
87.412	0.696563	0.696012	0.694985
87.534	0.696664	0.695998	0.694984
87.685	0.696787	0.695998	0.694983
87.776	0.696858	0.69602	0.694978
87.837	0.696903	0.696048	0.694975
87.958	0.696983	0.696084	0.69497
88.049	0.697042	0.69613	0.694967
88.14	0.697095	0.696174	0.694971
88.228	0.697148	0.696223	0.694973
88.322	0.697204	0.696285	0.694982
88.444	0.697261	0.696388	0.695012
88.565	0.697311	0.696525	0.695048
88.686	0.697352	0.696667	0.695084
88.777	0.697382	0.696839	0.695113
88.838	0.697393	0.696963	0.695133
88.929	0.697423	0.697135	0.695159
89.05	0.697452	0.697369	0.695201
89.172	0.697462	0.697605	0.695244
89.263	0.697464	0.69777	0.695284
89.354	0.697469	0.697914	0.695318
89.445	0.697475	0.698066	0.69535
89.566	0.697498	0.698238	0.695401
89.688	0.697548	0.698404	0.695464
89.809	0.697619	0.698569	0.695537
89.87	0.697667	0.698642	0.695577
89.961	0.697718	0.698763	0.695643
90.082	0.697799	0.698922	0.695743
90.147	0.697842	0.699025	0.695796
90.268	0.697928	0.699154	0.695909
90.355	0.697986	0.699236	0.695987
90.507	0.698094	0.699377	0.696128
90.598	0.698174	0.699461	0.696212
90.689	0.698257	0.699531	0.696296
90.811	0.698373	0.699623	0.696403
90.902	0.698459	0.699705	0.696479
90.963	0.698513	0.699766	0.696529
91.084	0.698613	0.699868	0.696622
91.205	0.698695	0.699966	0.696711
91.3	0.698742	0.700052	0.69678
91.388	0.698786	0.700111	0.696846
91.479	0.69883	0.700172	0.696918
91.6	0.698872	0.700234	0.697019
91.722	0.698903	0.700283	0.697123
91.786	0.698919	0.700285	0.697177
91.908	0.698951	0.700303	0.697273
92.026	0.698983	0.700322	0.697367
92.147	0.699016	0.700321	0.697451
92.211	0.699014	0.700303	0.697486
92.299	0.699011	0.700287	0.697535
92.39	0.698991	0.700246	0.697587
92.481	0.698972	0.70019	0.697624
92.603	0.698939	0.700112	0.69765
92.724	0.698907	0.700023	0.697668
92.819	0.69888	0.699959	0.697674
92.906	0.698843	0.699904	0.697667
93.028	0.698798	0.699836	0.697663
93.119	0.698755	0.699819	0.697664
93.21	0.698717	0.6998	0.69767
93.302	0.69868	0.699816	0.697674
93.423	0.69865	0.699843	0.697673
93.514	0.698632	0.699861	0.69767
93.636	0.698681	0.699907	0.697661
93.727	0.698714	0.699991	0.69765
93.849	0.698811	0.700128	0.697637
93.909	0.698856	0.700199	0.697628
94.031	0.698943	0.700353	0.697609
94.122	0.699009	0.700468	0.697589
94.213	0.699072	0.700583	0.697574
94.335	0.699157	0.700753	0.697548
94.426	0.699244	0.70088	0.697542
94.517	0.699314	0.701014	0.69751
94.639	0.699419	0.701176	0.697492
94.699	0.699473	0.701253	0.697477
94.825	0.699594	0.701455	0.697458
94.943	0.699683	0.701614	0.697415
95.064	0.699822	0.701822	0.697403
	Ti [°C]	Ratio @ Ti
	53.5972	0.644613
	53.6185	0.645009
	53.6791	0.645589

## Sheet: NCS1Ric8a452 assembly
NCS-1/Ric-8A-452	REPEAT 1	REPEAT 2	REPEAT 3									NCS-1/Ric-8A-452 (First derivative)	REPEAT 1	REPEAT 2	REPEAT 3
Temperature [°C]	Ratio 350 nm / 330 nm	Ratio 350 nm / 330 nm	Ratio 350 nm / 330 nm									Temperature [°C]	Ratio 350 nm / 330 nm	Ratio 350 nm / 330 nm	Ratio 350 nm / 330 nm
35.148	0.687988	0.712673	0.68862									35.148	-0.000536688	-0.000698486	-0.000257084
35.238	0.687983	0.712559	0.68853									35.238	-0.000507266	-0.000636601	-0.00021342
35.391	0.687948	0.712428	0.688479									35.391	-0.000457466	-0.000576591	-0.000192278
35.506	0.687905	0.712313	0.688407									35.506	-0.000420291	-0.000518239	-0.000158131
35.629	0.687872	0.712219	0.688345									35.629	-0.000380552	-0.000472631	-0.000131953
35.745	0.687834	0.712154	0.688306									35.745	-0.000343519	-0.000438947	-0.000112743
35.864	0.68779	0.712064	0.688238									35.864	-0.00030575	-0.000396553	-8.20131e-05
35.954	0.687757	0.711995	0.688206									35.954	-0.000277541	-0.000362835	-7.00733e-05
36.077	0.687718	0.711959	0.688128									36.077	-0.000239293	-0.00034302	-4.70091e-05
36.163	0.6877	0.711878	0.688054									36.163	-0.000212899	-0.000300493	-3.03506e-05
36.256	0.687668	0.711799	0.687996									36.256	-0.000184746	-0.000260566	-8.54055e-06
36.342	0.68762	0.711739	0.687986									36.342	-0.000159007	-0.000231438	7.11889e-06
36.431	0.687572	0.711638	0.687995									36.431	-0.00013272	-0.000194417	2.2612e-05
36.521	0.6875	0.711553	0.688001									36.521	-0.000106601	-0.000156316	3.75759e-05
36.673	0.687379	0.711511	0.688036									36.673	-6.33881e-05	-0.000129035	5.73253e-05
36.793	0.687294	0.711484	0.68807									36.793	-3.01967e-05	-0.000102621	7.17063e-05
36.882	0.687229	0.711439	0.688098									36.882	-6.07131e-06	-7.75366e-05	8.60747e-05
37.002	0.687173	0.711501	0.688153									37.002	2.57777e-05	-3.48974e-05	0.000100179
37.121	0.687139	0.711525	0.688238									37.121	5.67218e-05	-1.71297e-05	0.000114416
37.21	0.687141	0.711607	0.688436									37.21	7.95017e-05	8.08546e-06	0.000138078
37.3	0.687166	0.711694	0.688515									37.3	0.00010231	3.28777e-05	0.00014769
37.39	0.687229	0.711832	0.688631									37.39	0.000124978	6.62584e-05	0.000162095
37.479	0.687316	0.711967	0.688745									37.479	0.000147353	9.94903e-05	0.00017739
37.569	0.687416	0.712067	0.688904									37.569	0.000170097	0.000123722	0.000202646
37.684	0.687543	0.712158	0.688987									37.684	0.000199538	0.000158886	0.000217285
37.808	0.687664	0.712175	0.689031									37.808	0.000232221	0.000166408	0.000232979
37.867	0.687727	0.712291	0.689051									37.867	0.000248276	0.000211375	0.000248551
37.987	0.68782	0.712335	0.689021									37.987	0.000282321	0.000238254	0.000258934
38.046	0.68784	0.712387	0.689027									38.046	0.000299886	0.000264767	0.000278542
38.166	0.687931	0.712445	0.689013									38.166	0.000337514	0.000298001	0.000295618
38.285	0.688013	0.712502	0.688976									38.285	0.000366058	0.000312002	0.00029976
38.375	0.688071	0.712546	0.688954									38.375	0.000380605	0.000313796	0.000300318
38.494	0.688134	0.712591	0.688928									38.494	0.000411214	0.000311586	0.000299913
38.584	0.688169	0.712616	0.688913									38.584	0.000428631	0.000316713	0.00029861
38.669	0.688186	0.712639	0.688867									38.669	0.000447315	0.000304814	0.000294172
38.759	0.688204	0.712643	0.688881									38.759	0.000461372	0.000299811	0.0002926
38.849	0.68821	0.712646	0.688936									38.849	0.000477045	0.000280865	0.000289885
38.968	0.688232	0.71264	0.689014									38.968	0.000497198	0.000262477	0.000282034
39.091	0.688281	0.712663	0.68907									39.091	0.00051432	0.000244308	0.000274861
39.181	0.688331	0.712694	0.689105									39.181	0.000523749	0.000219766	0.000279881
39.3	0.688413	0.71274	0.689185									39.3	0.000533956	0.000194591	0.00027689
39.42	0.688498	0.712778	0.689255									39.42	0.000541769	0.000176563	0.000270455
39.479	0.688536	0.712827	0.689269									39.479	0.000544106	0.000153813	0.000270346
39.569	0.688588	0.712846	0.689263									39.569	0.000546498	0.000140946	0.000274076
39.655	0.688645	0.712887	0.689267									39.655	0.000547329	0.000121988	0.000277853
39.808	0.688712	0.712892	0.689258									39.808	0.000543133	0.000117548	0.000277809
39.898	0.68874	0.712876	0.689242									39.898	0.000541109	0.000108605	0.000281924
40.017	0.688775	0.71285	0.689231									40.017	0.000537958	0.000105126	0.000285968
40.077	0.688793	0.712834	0.689193									40.077	0.000536836	0.000104802	0.000295552
40.196	0.688837	0.712796	0.689178									40.196	0.000532913	0.000107512	0.000302794
40.316	0.688876	0.712768	0.689155									40.316	0.0005296	0.000113124	0.000310306
40.406	0.688906	0.712744	0.689146									40.406	0.000527077	0.000117874	0.000317467
40.495	0.688931	0.712712	0.689185									40.495	0.000523265	0.00013516	0.000321408
40.555	0.688951	0.712702	0.689246									40.555	0.000520147	0.000141261	0.000331383
40.674	0.689018	0.712676	0.68934									40.674	0.000519215	0.000149833	0.000337808
40.76	0.689086	0.712653	0.689421									40.76	0.000516194	0.000163175	0.000345272
40.91	0.689174	0.712626	0.689518									40.91	0.000509799	0.00017122	0.000350904
40.999	0.689258	0.712614	0.689575									40.999	0.000507738	0.000175588	0.000355441
41.119	0.689389	0.7126	0.689643									41.119	0.000500967	0.00018288	0.000360598
41.212	0.689489	0.7126	0.689737									41.212	0.000498961	0.000188767	0.000367675
41.302	0.689589	0.712601	0.68979									41.302	0.000496562	0.000193039	0.000371424
41.388	0.689669	0.712599	0.689871									41.388	0.000495388	0.000196361	0.000378684
41.511	0.689794	0.712598	0.68996									41.511	0.000493522	0.000198184	0.000388529
41.571	0.689838	0.712605	0.690017									41.571	0.000493477	0.000203501	0.000400221
41.72	0.689967	0.71262	0.690033									41.72	0.000494968	0.000206688	0.000409598
41.836	0.690041	0.712644	0.690056									41.836	0.00049783	0.000212477	0.000422724
41.926	0.690089	0.712739	0.690068									41.926	0.000500645	0.000221069	0.000432385
42.019	0.690124	0.712808	0.690093									42.019	0.00050361	0.000229854	0.000442461
42.079	0.690138	0.712955	0.690126									42.079	0.000506328	0.000240973	0.000446015
42.198	0.69015	0.713055	0.69018									42.198	0.000509886	0.000253091	0.000454414
42.318	0.690147	0.713158	0.690229									42.318	0.000514188	0.000266018	0.000459724
42.438	0.690164	0.713212	0.690252									42.438	0.000517648	0.000273907	0.000461087
42.553	0.690192	0.713289	0.690272									42.553	0.000520729	0.000294531	0.000460136
42.647	0.690222	0.713324	0.690279									42.647	0.0005218	0.00031014	0.000457488
42.736	0.690254	0.71335	0.690294									42.736	0.000522223	0.000332395	0.000450225
42.826	0.690287	0.71336	0.690301									42.826	0.000520047	0.000356121	0.000447233
42.886	0.6903	0.713387	0.690346									42.886	0.000521737	0.000378733	0.000441724
43.005	0.690327	0.713415	0.690406									43.005	0.000519454	0.000395621	0.000438072
43.125	0.690354	0.713443	0.690481									43.125	0.000518171	0.000406302	0.000432487
43.215	0.690378	0.713498	0.69053									43.215	0.00051557	0.000425753	0.000436054
43.331	0.690416	0.713554	0.690559									43.331	0.000516142	0.000438826	0.000436103
43.424	0.690452	0.713595	0.690624									43.424	0.000519604	0.000449071	0.00043743
43.544	0.69049	0.713631	0.690704									43.544	0.000531238	0.000459523	0.000448057
43.633	0.690519	0.713599	0.690762									43.633	0.000543625	0.000464382	0.000452741
43.693	0.690546	0.713573	0.690862									43.693	0.00055503	0.000464536	0.000466803
43.783	0.690604	0.713502	0.690884									43.783	0.000567299	0.000464315	0.000468612
43.903	0.690712	0.713455	0.690975									43.903	0.00058492	0.000457993	0.000480563
44.019	0.690836	0.713423	0.691022									44.019	0.000606183	0.000449899	0.000485965
44.138	0.690963	0.71344	0.691109									44.138	0.000631602	0.000436814	0.000494835
44.262	0.691064	0.713481	0.691158									44.262	0.000661038	0.000426943	0.000498039
44.351	0.691122	0.713537	0.691192									44.351	0.00068098	0.000416253	0.000500882
44.411	0.691148	0.713652	0.691206									44.411	0.000693668	0.000399154	0.000501278
44.561	0.691217	0.713803	0.691209									44.561	0.000722726	0.000375445	0.000501758
44.62	0.691253	0.713885	0.691197									44.62	0.000732449	0.000363129	0.000496303
44.74	0.691345	0.71398	0.691191									44.74	0.000749882	0.000344751	0.000490227
44.86	0.691441	0.714012	0.691194									44.86	0.000766845	0.000338279	0.000482794
44.95	0.691513	0.714043	0.691213									44.95	0.000774749	0.000332178	0.000474745
45.069	0.691576	0.714189	0.691265									45.069	0.000778394	0.000316252	0.000466221
45.159	0.691603	0.714266	0.691325									45.159	0.000777273	0.000306331	0.000457453
45.215	0.69161	0.714353	0.691422									45.215	0.000781149	0.000299551	0.000445229
45.335	0.691624	0.714455	0.691479									45.335	0.000780649	0.00029469	0.000436722
45.428	0.691702	0.714508	0.691562									45.428	0.000774918	0.000288429	0.00042584
45.544	0.691826	0.714579	0.691694									45.544	0.000776797	0.000283838	0.000416179
45.638	0.691986	0.714632	0.691799									45.638	0.000768294	0.000278283	0.000410151
45.727	0.692131	0.714695	0.691922									45.727	0.000762374	0.000268087	0.000404047
45.847	0.69232	0.714711	0.69205									45.847	0.000755355	0.000267585	0.000401373
45.967	0.692491	0.714731	0.692144									45.967	0.000740217	0.000258946	0.000400456
46.057	0.692609	0.714734	0.692231									46.057	0.00073443	0.000245735	0.00040158
46.146	0.692727	0.714733	0.692313									46.146	0.000728116	0.000233944	0.000404028
46.236	0.692853	0.714719	0.692354									46.236	0.000720192	0.000220811	0.000411079
46.322	0.692988	0.71471	0.692368									46.322	0.000711545	0.000205849	0.000414888
46.442	0.693129	0.714672	0.692359									46.442	0.000701336	0.000183595	0.000419899
46.536	0.693212	0.714634	0.692331									46.536	0.000694126	0.000164659	0.000426182
46.685	0.693313	0.714574	0.692288									46.685	0.000684631	0.00014111	0.000433747
46.805	0.693356	0.714528	0.692232									46.805	0.000676474	0.000121699	0.000445186
46.895	0.693373	0.714508	0.692203									46.895	0.0006706	0.000106958	0.000455364
46.985	0.693385	0.714485	0.692158									46.985	0.0006645	8.47113e-05	0.000464194
47.074	0.693401	0.714478	0.692143									47.074	0.000657802	6.79701e-05	0.000472957
47.164	0.693425	0.714485	0.692148									47.164	0.000649933	5.58732e-05	0.000480274
47.254	0.693451	0.714501	0.692171									47.254	0.000641876	4.44289e-05	0.000486382
47.31	0.693477	0.714518	0.692217									47.31	0.000635254	4.75488e-05	0.000487667
47.464	0.693508	0.714525	0.692259									47.464	0.000615084	4.06154e-05	0.000484675
47.583	0.693525	0.714532	0.692297									47.583	0.000594811	3.92415e-05	0.00048318
47.673	0.693536	0.71453	0.692326									47.673	0.000578862	4.71448e-05	0.000480611
47.793	0.693568	0.714543	0.692359									47.793	0.000553813	5.60786e-05	0.00047829
47.853	0.693592	0.71455	0.692418									47.853	0.000540482	6.78708e-05	0.000472846
47.943	0.693633	0.71456	0.692483									47.943	0.000520679	8.8794e-05	0.000470664
48.062	0.693698	0.714581	0.692546									48.062	0.00049168	0.000107379	0.000470058
48.152	0.693747	0.714572	0.692598									48.152	0.00047123	0.000137313	0.000470759
48.272	0.693812	0.714584	0.692704									48.272	0.000446494	0.000160517	0.000477546
48.392	0.69388	0.714565	0.692768									48.392	0.000426339	0.000182622	0.000484857
48.512	0.693927	0.714551	0.692829									48.512	0.000414503	0.000207206	0.000495885
48.572	0.693953	0.714535	0.692868									48.572	0.000404929	0.000240361	0.00050251
48.691	0.694001	0.714513	0.692938									48.691	0.000403106	0.000271604	0.000521716
48.777	0.694041	0.714504	0.693011									48.777	0.000405275	0.00028648	0.000538094
48.867	0.694091	0.714491	0.693132									48.867	0.000410398	0.000315169	0.000562246
48.961	0.694154	0.714503	0.693284									48.961	0.000416386	0.000335793	0.000586471
49.081	0.694256	0.714546	0.693454									49.081	0.000432505	0.000360161	0.000607918
49.171	0.694345	0.714576	0.693599									49.171	0.000449904	0.000375972	0.000629318
49.26	0.694434	0.714629	0.693712									49.26	0.000468021	0.000389997	0.000645716
49.38	0.694529	0.714673	0.693785									49.38	0.000490601	0.000399907	0.000658201
49.53	0.694624	0.714721	0.693833									49.53	0.000517733	0.000412715	0.000670095
49.65	0.694664	0.714765	0.693841									49.65	0.000539644	0.000420656	0.000680614
49.74	0.694663	0.714834	0.693853									49.74	0.000554745	0.000429278	0.000687136
49.8	0.694673	0.714917	0.693845									49.8	0.000562686	0.000438874	0.00069803
49.89	0.694678	0.714994	0.693826									49.89	0.000576539	0.000441215	0.000707099
49.98	0.694675	0.715088	0.693824									49.98	0.000587979	0.000448096	0.000710753
50.07	0.69467	0.715171	0.693829									50.07	0.000597014	0.000451388	0.000716231
50.189	0.694652	0.715261	0.69383									50.189	0.000606836	0.000452163	0.00071913
50.339	0.69461	0.715383	0.693868									50.339	0.000614059	0.000460251	0.000719509
50.429	0.694589	0.715474	0.693897									50.429	0.000615868	0.000461529	0.000717708
50.519	0.694551	0.715589	0.693906									50.519	0.000619731	0.000465446	0.000716215
50.579	0.694575	0.715689	0.693983									50.579	0.000621367	0.000477155	0.000711644
50.669	0.694604	0.715764	0.694073									50.669	0.00062128	0.000480631	0.000707145
50.789	0.694733	0.715842	0.694188									50.789	0.000622978	0.000485751	0.00069862
50.909	0.694886	0.715904	0.694373									50.909	0.000624166	0.000490737	0.000688334
51.029	0.695092	0.715979	0.694455									51.029	0.000627285	0.000497265	0.000685045
51.119	0.695223	0.716026	0.694591									51.119	0.000631275	0.000501867	0.00067985
51.209	0.69535	0.716055	0.694727									51.209	0.000636458	0.000504244	0.00067695
51.299	0.695458	0.716072	0.694824									51.299	0.000643205	0.000505888	0.000675907
51.448	0.695666	0.716072	0.694914									51.448	0.000657074	0.000506586	0.000677057
51.478	0.695701	0.716103	0.694999									51.478	0.000660244	0.000503808	0.000681762
51.598	0.695882	0.716129	0.695065									51.598	0.000674214	0.000498457	0.000691019
51.718	0.696035	0.716149	0.695141									51.718	0.000690513	0.000491641	0.000703527
51.838	0.696167	0.716163	0.695228									51.838	0.000704811	0.0004859	0.000718326
51.928	0.69624	0.716173	0.695286									51.928	0.000716062	0.00047661	0.000730318
51.988	0.696268	0.716178	0.695345									51.988	0.000723241	0.000468866	0.00073898
52.078	0.696309	0.716182	0.695445									52.078	0.000730233	0.000459497	0.000750569
52.228	0.696337	0.716195	0.695526									52.228	0.000746213	0.00044479	0.000761663
52.348	0.696351	0.716199	0.69562									52.348	0.000751699	0.000434712	0.000775021
52.468	0.696387	0.716208	0.695695									52.468	0.000750702	0.00042339	0.00078432
52.528	0.696412	0.716239	0.695741									52.528	0.000752728	0.000411828	0.000788852
52.588	0.696449	0.716265	0.695772									52.588	0.000750473	0.000404201	0.000790983
52.708	0.696519	0.716321	0.695825									52.708	0.000743709	0.000395844	0.000791977
52.798	0.696563	0.716359	0.695865									52.798	0.00073296	0.000390188	0.000791519
52.918	0.696601	0.716404	0.695931									52.918	0.00071348	0.000387847	0.000788542
53.067	0.696666	0.716499	0.69596									53.067	0.000687088	0.00038528	0.000787104
53.158	0.696716	0.716582	0.695954									53.158	0.000669942	0.000385289	0.000784261
53.247	0.696758	0.716701	0.695941									53.247	0.00065177	0.000388011	0.000784017
53.338	0.696828	0.716786	0.695939									53.338	0.000632506	0.000390921	0.000779526
53.428	0.696924	0.716881	0.695964									53.428	0.000615075	0.000397687	0.000780483
53.547	0.697056	0.716962	0.696011									53.547	0.000595107	0.000408528	0.000783184
53.608	0.697116	0.716979	0.696154									53.608	0.000588953	0.000413636	0.000785942
53.727	0.697239	0.717005	0.696242									53.727	0.000571595	0.000422504	0.000787128
53.818	0.697318	0.717033	0.69643									53.818	0.000560716	0.000431658	0.000792125
53.938	0.697432	0.717079	0.696573									53.938	0.000551894	0.000443719	0.000795444
54.058	0.697535	0.717119	0.696709									54.058	0.000544667	0.000453895	0.000798738
54.147	0.697601	0.717139	0.696958									54.147	0.00054125	0.000463158	0.000804114
54.237	0.697664	0.71717	0.697089									54.237	0.000538834	0.000473718	0.000804672
54.328	0.697723	0.717209	0.697207									54.328	0.000537289	0.000483581	0.000806411
54.418	0.697759	0.717245	0.697302									54.418	0.000536507	0.000490117	0.000808224
54.538	0.69778	0.717268	0.697345									54.538	0.000536597	0.000493356	0.000812198
54.658	0.697796	0.717324	0.697401									54.658	0.000537663	0.000499681	0.000814192
54.752	0.697804	0.717355	0.697443									54.752	0.000538256	0.000503655	0.000819017
54.872	0.697831	0.717376	0.697478									54.872	0.000540626	0.000510433	0.000821251
54.928	0.697847	0.717392	0.697529									54.928	0.000542701	0.000512617	0.000829206
55.048	0.697879	0.717404	0.697584									55.048	0.000542977	0.000516871	0.000834553
55.168	0.697899	0.717435	0.697689									55.168	0.000545506	0.000519972	0.000847178
55.258	0.697902	0.717475	0.697747									55.258	0.000544198	0.000525147	0.000852534
55.322	0.697914	0.717526	0.69785									55.322	0.000545626	0.000527947	0.000860338
55.412	0.697937	0.717605	0.69797									55.412	0.000543472	0.000534417	0.000870096
55.588	0.698037	0.7177	0.698066									55.588	0.000541089	0.000541023	0.000877343
55.674	0.698102	0.717777	0.698212									55.674	0.000541554	0.000548005	0.00088354
55.738	0.698165	0.717873	0.698337									55.738	0.000537363	0.000558195	0.000886137
55.828	0.698243	0.717914	0.698456									55.828	0.00053822	0.00056379	0.000886592
55.978	0.698326	0.717966	0.698564									55.978	0.000537211	0.000572566	0.000884298
56.099	0.69836	0.71802	0.69865									56.099	0.000537198	0.00058179	0.000879644
56.129	0.698367	0.718068	0.69871									56.129	0.00053837	0.000594837	0.000870913
56.249	0.698403	0.718155	0.69875									56.249	0.000541103	0.000613206	0.000855305
56.369	0.698443	0.718188	0.698757									56.369	0.000545763	0.000620301	0.00083816
56.455	0.698491	0.71827	0.698767									56.455	0.0005501	0.000640595	0.000815017
56.583	0.698587	0.718335	0.698777									56.583	0.000558922	0.000654485	0.00079234
56.703	0.69869	0.718436	0.698797									56.703	0.000567464	0.000670994	0.000778154
56.789	0.698757	0.718522	0.69882									56.789	0.000575547	0.000685344	0.000756877
56.849	0.6988	0.718598	0.6989									56.849	0.00058177	0.000698735	0.000721469
56.999	0.698855	0.718673	0.69897									56.999	0.000595968	0.000712853	0.000700658
57.09	0.698908	0.718719	0.699066									57.09	0.000605817	0.000723012	0.00068066
57.18	0.698984	0.718761	0.699183									57.18	0.000614136	0.000732573	0.000666089
57.27	0.69906	0.71885	0.699299									57.27	0.000622283	0.000753201	0.000646614
57.36	0.699151	0.71895	0.699495									57.36	0.000630832	0.000774793	0.000629128
57.45	0.69925	0.71899	0.699715									57.45	0.000638975	0.000784638	0.000613694
57.6	0.699416	0.71907	0.699886									57.6	0.000652259	0.000802165	0.000606275
57.66	0.699463	0.719152	0.700091									57.66	0.000657337	0.00081809	0.000604642
57.78	0.699534	0.719218	0.700194									57.78	0.000665597	0.000828514	0.000604634
57.93	0.699599	0.719349	0.700361									57.93	0.000675664	0.000845349	0.000606797
58.02	0.699628	0.719402	0.700437									58.02	0.000681018	0.000851424	0.000607824
58.051	0.699644	0.719495	0.700478									58.051	0.000682843	0.000859748	0.000621294
58.171	0.69969	0.719535	0.700501									58.171	0.000689044	0.000864769	0.000626789
58.321	0.699758	0.719653	0.700515									58.321	0.000694887	0.000871043	0.000635038
58.411	0.699797	0.719706	0.700532									58.411	0.00069701	0.000871239	0.000647624
58.501	0.699832	0.719816	0.700495									58.501	0.000698717	0.000873218	0.000658163
58.591	0.69987	0.719854	0.70041									58.591	0.000701033	0.000873031	0.000669638
58.682	0.699914	0.719954	0.700311									58.682	0.000701043	0.000871806	0.000675113
58.772	0.699983	0.720055	0.700199									58.772	0.000701472	0.000869631	0.000681185
58.892	0.700095	0.720146	0.700132									58.892	0.000702215	0.000868912	0.00068468
59.012	0.700238	0.720286	0.700072									59.012	0.000703337	0.000861564	0.000687182
59.132	0.700379	0.720399	0.700037									59.132	0.000706475	0.000855734	0.000686303
59.223	0.700457	0.720573	0.700045									59.223	0.00071496	0.000844682	0.0006854
59.313	0.700514	0.72069	0.700134									59.313	0.000719562	0.000840042	0.00068295
59.403	0.700562	0.720809	0.700197									59.403	0.000725582	0.000828265	0.000678836
59.523	0.700636	0.720935	0.700298									59.523	0.00074258	0.000824564	0.00067789
59.583	0.700674	0.721051	0.700354									59.583	0.000747725	0.000811471	0.000678486
59.673	0.700735	0.721154	0.700441									59.673	0.000758578	0.000800737	0.000683065
59.794	0.700838	0.721254	0.700568									59.794	0.000780676	0.000785877	0.000686631
59.884	0.700932	0.721402	0.700722									59.884	0.000797116	0.000765286	0.000691126
60.004	0.70105	0.721468	0.700972									60.004	0.000815922	0.000754178	0.000703232
60.128	0.701142	0.721527	0.701222									60.128	0.000833978	0.000739305	0.000718148
60.248	0.701217	0.721579	0.701275									60.248	0.000848303	0.000724942	0.000721095
60.365	0.701282	0.721642	0.701542									60.365	0.000858241	0.000707269	0.000748458
60.455	0.701329	0.721677	0.70163									60.455	0.000864896	0.000699249	0.000772988
60.545	0.701397	0.721739	0.701682									60.545	0.00086985	0.000685121	0.000797202
60.605	0.70145	0.721824	0.701712									60.605	0.000874376	0.000664933	0.000814653
60.696	0.70151	0.721923	0.701761									60.696	0.000879314	0.000642356	0.000846488
60.846	0.701601	0.722016	0.70186									60.846	0.00087791	0.000618044	0.000869832
60.936	0.701644	0.722081	0.701954									60.936	0.000878994	0.00059034	0.000897706
61.026	0.701683	0.722107	0.702034									61.026	0.000875599	0.000568306	0.000920739
61.117	0.701737	0.722119	0.702107									61.117	0.000874189	0.000543949	0.000944092
61.207	0.701805	0.722126	0.702182									61.207	0.000872665	0.000526925	0.000976133
61.297	0.701903	0.722123	0.702216									61.297	0.000872167	0.000509129	0.000998371
61.447	0.702029	0.722115	0.702291									61.447	0.000873243	0.000471965	0.00102846
61.538	0.702193	0.722147	0.702368									61.538	0.000875726	0.000422747	0.00104736
61.628	0.70236	0.722208	0.702488									61.628	0.00087997	0.000382756	0.00106795
61.748	0.702593	0.722283	0.702725									61.748	0.000889636	0.000343904	0.00109458
61.838	0.702757	0.722335	0.702905									61.838	0.000898308	0.000316145	0.0011256
61.929	0.702901	0.722364	0.703026									61.929	0.000908807	0.000298623	0.00115511
61.989	0.702981	0.722405	0.703065									61.989	0.000916399	0.000265974	0.00117437
62.143	0.703209	0.722419	0.703098									62.143	0.000936159	0.00024316	0.00118239
62.229	0.703303	0.722421	0.703136									62.229	0.000949778	0.000217662	0.00120696
62.346	0.703396	0.722434	0.703163									62.346	0.00096709	0.000210413	0.00121473
62.44	0.70348	0.722447	0.703218									62.44	0.000980853	0.000197811	0.00123748
62.56	0.703537	0.722493	0.703309									62.56	0.00099759	0.000185931	0.00126388
62.62	0.70355	0.722579	0.703405									62.62	0.00100626	0.000174634	0.00129003
62.681	0.703555	0.722636	0.703444									62.681	0.00101407	0.000170913	0.00130185
62.831	0.703531	0.722738	0.703521									62.831	0.00103153	0.000170356	0.00132735
62.955	0.703516	0.722836	0.703604									62.955	0.00104498	0.000166855	0.00134561
63.102	0.703551	0.722881	0.703671									63.102	0.00105949	0.000163559	0.00136479
63.132	0.70355	0.722897	0.703909									63.132	0.00106142	0.000161062	0.00139652
63.252	0.703636	0.722865	0.704093									63.252	0.0010707	0.000157889	0.00141252
63.343	0.703731	0.722783	0.704327									63.343	0.00108008	0.000150593	0.00143279
63.463	0.703875	0.722737	0.704638									63.463	0.00108745	0.000146584	0.00145689
63.587	0.704027	0.722659	0.704868									63.587	0.00109535	0.000140184	0.00147611
63.674	0.704149	0.722572	0.705161									63.674	0.00110217	0.000130488	0.001503
63.734	0.704234	0.722525	0.705226									63.734	0.00110427	0.000123222	0.00150947
63.854	0.704404	0.72249	0.705485									63.854	0.00111393	0.000114053	0.00154181
63.975	0.704599	0.722472	0.705755									63.975	0.0011236	0.000107835	0.00157852
64.095	0.704807	0.722469	0.705881									64.095	0.00113625	0.000108764	0.00159733
64.155	0.704897	0.722463	0.706237									64.155	0.0011444	0.000111088	0.00165037
64.28	0.705068	0.722458	0.706423									64.28	0.00116506	0.000116873	0.00168357
64.366	0.705175	0.722457	0.706589									64.366	0.00118256	0.000123205	0.00171591
64.456	0.705286	0.722464	0.706746									64.456	0.00120372	0.000136196	0.00175203
64.577	0.705426	0.722518	0.706945									64.577	0.0012381	0.000169032	0.00180779
64.667	0.705541	0.722604	0.707045									64.667	0.00126683	0.00018759	0.00184173
64.788	0.705701	0.722646	0.707136									64.788	0.00130857	0.000215356	0.00187409
64.878	0.705815	0.72286	0.707279									64.878	0.00134098	0.00028363	0.00191487
64.998	0.705959	0.722967	0.70739									64.998	0.00138482	0.000335949	0.00193994
65.058	0.706033	0.72303	0.707522									65.058	0.00140683	0.000401246	0.00196522
65.119	0.706111	0.723046	0.707665									65.119	0.00142915	0.000419855	0.00198746
65.269	0.706291	0.72307	0.707756									65.269	0.00148236	0.000486674	0.00200219
65.363	0.706428	0.723088	0.707887									65.363	0.00151357	0.000567873	0.00201983
65.45	0.70655	0.723042	0.708065									65.45	0.00154237	0.000649529	0.00204087
65.601	0.706787	0.722995	0.708187									65.601	0.00159107	0.000705293	0.0020547
65.721	0.706978	0.722958	0.708459									65.721	0.00163429	0.000746759	0.00208079
65.811	0.707129	0.722917	0.70863									65.811	0.00166618	0.000803205	0.00209762
65.902	0.707265	0.722872	0.708823									65.902	0.00169141	0.000897768	0.0021103
65.992	0.707382	0.722867	0.709034									65.992	0.00171823	0.000972314	0.00212797
66.083	0.707492	0.722915	0.70925									66.083	0.00175284	0.00102611	0.00214771
66.173	0.707595	0.722897	0.709476									66.173	0.00178432	0.00106228	0.00216844
66.263	0.707703	0.722987	0.70969									66.263	0.00181993	0.00111583	0.00219633
66.414	0.707931	0.723059	0.709857									66.414	0.00187328	0.00118599	0.00221757
66.504	0.70809	0.723216	0.710205									66.504	0.00190626	0.00125641	0.00226498
66.564	0.708191	0.723381	0.71047									66.564	0.00193036	0.00133395	0.00229924
66.689	0.708447	0.723481	0.710837									66.689	0.00198143	0.00136835	0.00235368
66.779	0.708642	0.723689	0.711305									66.779	0.00202052	0.00143164	0.00242602
66.926	0.708974	0.723966	0.711649									66.926	0.00208212	0.00151714	0.00248783
67.046	0.709258	0.724256	0.711891									67.046	0.00213409	0.00159376	0.00253378
67.137	0.709474	0.724708	0.712126									67.137	0.00217447	0.00171942	0.00257812
67.227	0.709686	0.725067	0.712272									67.227	0.00221356	0.00182888	0.00260695
67.287	0.709829	0.725322	0.712575									67.287	0.00224074	0.00191393	0.00266646
67.408	0.710136	0.725448	0.712898									67.408	0.00229429	0.00197318	0.00272117
67.502	0.710383	0.725665	0.713134									67.502	0.00233387	0.00206191	0.00276007
67.589	0.710594	0.725942	0.71336									67.589	0.00237312	0.00221273	0.00279906
67.709	0.71088	0.726074	0.713583									67.709	0.0024271	0.00227224	0.00283346
67.8	0.711109	0.726238	0.713847									67.8	0.0024684	0.00236088	0.00287715
67.924	0.711411	0.726514	0.713969									67.924	0.00252041	0.00250825	0.00289851
68.014	0.711625	0.726686	0.71415									68.014	0.00255874	0.00258868	0.00293316
68.101	0.711863	0.726913	0.714499									68.101	0.00259207	0.00268646	0.00298829
68.226	0.712193	0.727031	0.71476									68.226	0.00263843	0.00272996	0.00302186
68.342	0.71253	0.727228	0.715064									68.342	0.00268445	0.00280061	0.00306252
68.406	0.712713	0.727499	0.715376									68.406	0.00270966	0.00287824	0.00309985
68.493	0.71297	0.727728	0.715779									68.493	0.00273558	0.00292812	0.00315812
68.613	0.713319	0.728037	0.71607									68.613	0.00277253	0.00299574	0.00320371
68.734	0.71368	0.728396	0.716478									68.734	0.00281229	0.00305107	0.00326283
68.885	0.714123	0.728552	0.716764									68.885	0.00284594	0.00308088	0.0033134
68.975	0.714387	0.72893	0.717103									68.975	0.00286816	0.0031356	0.00337509
69.005	0.714475	0.72929	0.71732									69.005	0.0028753	0.00317333	0.00341367
69.156	0.714918	0.729683	0.717761									69.156	0.00291278	0.00321202	0.00349128
69.247	0.715186	0.730192	0.71812									69.247	0.00293643	0.00326345	0.00355627
69.371	0.715549	0.730881	0.718607									69.371	0.00297303	0.00333159	0.00363635
69.427	0.715711	0.731145	0.719131									69.427	0.00298856	0.00335771	0.0037587
69.518	0.715982	0.731517	0.719428									69.518	0.00301813	0.00340121	0.00382517
69.608	0.716252	0.731753	0.719694									69.608	0.00305008	0.00342738	0.00389473
69.733	0.716635	0.732248	0.720118									69.733	0.00309463	0.00349199	0.00400979
69.884	0.717114	0.732562	0.720206									69.884	0.00316428	0.00353791	0.00403224
69.94	0.717299	0.733016	0.720497									69.94	0.00318214	0.00360005	0.00410468
70.061	0.717699	0.733461	0.72092									70.061	0.00324056	0.00365866	0.00419921
70.121	0.717901	0.733791	0.721382									70.121	0.00327702	0.00370827	0.00429972
70.212	0.718217	0.734121	0.721714									70.212	0.00332923	0.00375452	0.00437141
70.332	0.718634	0.734562	0.722071									70.332	0.00339129	0.00381704	0.00444628
70.453	0.719039	0.735001	0.722566									70.453	0.00346054	0.00387455	0.00454391
70.604	0.719482	0.73522	0.723007									70.604	0.00355439	0.00390487	0.00461868
70.664	0.719655	0.735669	0.723301									70.664	0.00358916	0.00396349	0.00466506
70.754	0.719904	0.736119	0.723835									70.754	0.00363939	0.00403072	0.0047452
70.815	0.720059	0.736349	0.724289									70.815	0.00368148	0.00406435	0.00481549
70.935	0.720378	0.736779	0.725142									70.935	0.00375154	0.00412589	0.00494321
71.056	0.720716	0.736998	0.725834									71.056	0.00382745	0.00416742	0.00504882
71.177	0.721114	0.737438	0.726329									71.177	0.00390627	0.00422473	0.00512512
71.267	0.721423	0.737799	0.726803									71.267	0.00396099	0.0042928	0.00520212
71.392	0.721878	0.738159	0.72728									71.392	0.00404157	0.00435426	0.00527514
71.452	0.722098	0.738781	0.727803									71.452	0.00407997	0.00446404	0.0053548
71.569	0.722525	0.739266	0.728307									71.569	0.00415549	0.00456531	0.00543169
71.69	0.722995	0.739648	0.728797									71.69	0.00423263	0.00462906	0.00551137
71.75	0.723242	0.740035	0.729577									71.75	0.00427098	0.0047141	0.00563386
71.844	0.723668	0.740422	0.730056									71.844	0.00433136	0.0047829	0.00570588
71.961	0.724272	0.740815	0.73069									71.961	0.00440793	0.00486323	0.00579586
72.082	0.724971	0.741467	0.731023									72.082	0.00448703	0.0050002	0.00583907
72.203	0.725675	0.741869	0.731715									72.203	0.00456961	0.00507908	0.00593147
72.263	0.726008	0.742268	0.732492									72.263	0.00461203	0.00515895	0.0060134
72.388	0.726672	0.742679	0.732869									72.388	0.00469941	0.00523807	0.00605623
72.505	0.727238	0.742959	0.733878									72.505	0.0047775	0.00529194	0.00616044
72.595	0.727669	0.743523	0.734494									72.595	0.00484229	0.00539971	0.00622022
72.686	0.728113	0.744109	0.735086									72.686	0.00490878	0.00549742	0.00627728
72.776	0.728573	0.744567	0.735666									72.776	0.00497551	0.00557815	0.00633319
72.867	0.729057	0.74506	0.736442									72.867	0.00504669	0.00565061	0.00640619
72.961	0.729571	0.745823	0.737074									72.961	0.00511668	0.00575677	0.00646525
73.078	0.73021	0.746665	0.73749									73.078	0.00520738	0.00586106	0.00650581
73.173	0.730723	0.747337	0.738111									73.173	0.00528302	0.00594332	0.00656098
73.289	0.731339	0.748012	0.739144									73.289	0.00537385	0.00602508	0.0066576
73.38	0.7318	0.748639	0.739728									73.38	0.0054458	0.00610509	0.00671481
73.501	0.732419	0.749313	0.740356									73.501	0.00554168	0.00619023	0.00677791
73.591	0.732891	0.750185	0.740733									73.591	0.00561302	0.00630871	0.00681705
73.686	0.733404	0.75084	0.741531									73.686	0.00568769	0.006399	0.00689859
73.772	0.733881	0.751697	0.742312									73.772	0.00575904	0.00652472	0.00697997
73.897	0.734588	0.752541	0.742714									73.897	0.00585748	0.00664804	0.00702109
73.984	0.735068	0.753174	0.743743									73.984	0.00592091	0.00674416	0.00712294
74.105	0.735735	0.753824	0.744565									74.105	0.00601571	0.00683414	0.00720115
74.195	0.736236	0.754222	0.744951									74.195	0.00608072	0.0068924	0.00723709
74.286	0.736737	0.755109	0.745768									74.286	0.00615492	0.00701894	0.00731257
74.376	0.737237	0.755709	0.746581									74.376	0.00622685	0.00709864	0.00738582
74.501	0.737946	0.756718	0.747248									74.501	0.00631728	0.00722758	0.00744211
74.588	0.738456	0.757486	0.747921									74.588	0.00638256	0.00731241	0.00749434
74.739	0.739351	0.757871	0.748367									74.739	0.00649402	0.00735079	0.00752961
74.829	0.739891	0.758863	0.749263									74.829	0.00655935	0.00743231	0.00759465
74.924	0.740474	0.759045	0.75003									74.924	0.00662742	0.00745246	0.00764576
75.014	0.741049	0.759807	0.751251									75.014	0.00669289	0.00749559	0.00772723
75.135	0.741865	0.760621	0.752204									75.135	0.00677927	0.00753958	0.00778344
75.226	0.742507	0.761419	0.75296									75.226	0.00684638	0.00756303	0.00783109
75.286	0.742929	0.762336	0.753677									75.286	0.0068869	0.00758434	0.00787637
75.373	0.743597	0.762787	0.754409									75.373	0.00694819	0.0075987	0.00791107
75.494	0.744528	0.763565	0.754881									75.494	0.00703342	0.00761318	0.00793937
75.619	0.745464	0.763826	0.755904									75.619	0.00712546	0.00761706	0.00798605
75.739	0.746363	0.765163	0.75673									75.739	0.00720739	0.00765051	0.00802785
75.857	0.747276	0.766002	0.757517									75.857	0.00728806	0.00767299	0.00805088
75.917	0.747766	0.767381	0.758268									75.917	0.00732671	0.00771746	0.00807692
76.042	0.748806	0.768223	0.759557									76.042	0.00742016	0.00774858	0.00812198
76.159	0.74982	0.769066	0.760722									76.159	0.00750426	0.00778509	0.00815019
76.189	0.750084	0.770133	0.760964									76.189	0.00752272	0.00783995	0.00815932
76.28	0.750875	0.770924	0.761716									76.28	0.00758891	0.00788586	0.0081897
76.4	0.751874	0.771712	0.762473									76.4	0.00768033	0.0079363	0.00820605
76.555	0.753078	0.772474	0.76351									76.555	0.00778989	0.00798719	0.00821877
76.646	0.753756	0.773169	0.764648									76.646	0.00785123	0.00803684	0.00822564
76.737	0.75442	0.774109	0.765211									76.737	0.00791007	0.00810545	0.00824035
76.854	0.755314	0.774499	0.766312									76.854	0.00797495	0.00813698	0.00824795
76.978	0.756285	0.7754	0.76736									76.978	0.00803781	0.00820022	0.00824272
76.978	0.756285	0.776486	0.768122									76.978	0.00803781	0.00826583	0.00824868
77.16	0.75773	0.77735	0.768828									77.16	0.00811294	0.0083003	0.00824602
77.22	0.758194	0.777989	0.769355									77.22	0.00812414	0.00831772	0.00823317
77.341	0.75912	0.778409	0.770348									77.341	0.00815382	0.00833154	0.00821901
77.462	0.760037	0.779257	0.771078									77.462	0.00815594	0.00832695	0.00820156
77.519	0.760457	0.780127	0.77214									77.519	0.00816406	0.00831617	0.00817401
77.64	0.761397	0.780813	0.772868									77.64	0.00815653	0.00829772	0.00813345
77.791	0.762688	0.78149	0.774201									77.791	0.0081358	0.00825648	0.00805128
77.885	0.763496	0.782037	0.77485									77.885	0.00811471	0.00821266	0.00800633
77.976	0.764287	0.782783	0.775478									77.976	0.00809209	0.00817434	0.00795617
78.067	0.765076	0.783813	0.775921									78.067	0.00806735	0.00808227	0.00792981
78.157	0.765864	0.784872	0.776838									78.157	0.00804085	0.00800355	0.0078558
78.248	0.766648	0.786255	0.777576									78.248	0.00801319	0.00788222	0.00779095
78.335	0.767396	0.786817	0.778327									78.335	0.00798541	0.00784163	0.00771872
78.426	0.768179	0.787991	0.779117									78.426	0.00795794	0.00773096	0.00764319
78.551	0.769288	0.788588	0.779895									78.551	0.00791698	0.00768023	0.00755782
78.641	0.770133	0.789797	0.780921									78.641	0.00788791	0.00756475	0.00744876
78.789	0.771524	0.790996	0.781422									78.789	0.00783731	0.00748293	0.00738009
78.88	0.772417	0.791579	0.782389									78.88	0.00780227	0.00744781	0.00727325
79.035	0.773877	0.792731	0.78311									79.035	0.00772937	0.00737258	0.00718693
79.095	0.774418	0.793565	0.784101									79.095	0.00771644	0.00730447	0.00707713
79.186	0.775197	0.794598	0.785111									79.186	0.00768178	0.00722978	0.00696372
79.337	0.776412	0.795362	0.785864									79.337	0.00760071	0.00717272	0.00687269
79.397	0.776823	0.796332	0.786353									79.397	0.00755676	0.0070972	0.00681467
79.458	0.777295	0.796828	0.787066									79.458	0.0075339	0.00705693	0.00672582
79.579	0.778123	0.79793	0.788165									79.579	0.00746622	0.00694847	0.00658887
79.696	0.778864	0.798316	0.788755									79.696	0.0073863	0.00690182	0.00650721
79.761	0.779276	0.799027	0.789314									79.761	0.00734169	0.00680337	0.00642605
79.882	0.780022	0.799524	0.790018									79.882	0.00725706	0.00671868	0.00632065
80.003	0.780731	0.800154	0.790539									80.003	0.00716887	0.00659194	0.00624136
80.093	0.781254	0.80059	0.791059									80.093	0.00711214	0.00649546	0.00616629
80.184	0.781797	0.801085	0.791593									80.184	0.00704209	0.00634721	0.00610402
80.301	0.782505	0.801488	0.792304									80.301	0.00696722	0.00623014	0.00601387
80.366	0.782967	0.801774	0.792778									80.366	0.00691255	0.00615197	0.00595023
80.456	0.783593	0.80229	0.79321									80.456	0.00687097	0.00598021	0.00588279
80.577	0.784502	0.802651	0.793629									80.577	0.00680106	0.00586851	0.00583229
80.699	0.785409	0.803077	0.794286									80.699	0.00672811	0.00574715	0.00573211
80.82	0.786275	0.803658	0.794672									80.82	0.00665958	0.00557979	0.00564165
80.941	0.787152	0.804263	0.79522									80.941	0.0066124	0.00544789	0.0055841
81.032	0.787812	0.804752	0.795648									81.032	0.0065735	0.00534968	0.00554641
81.122	0.788422	0.805433	0.796096									81.122	0.00653664	0.00522698	0.00549671
81.213	0.789	0.805973	0.796549									81.213	0.0065017	0.00513309	0.00545239
81.304	0.789531	0.806725	0.796855									81.304	0.00646737	0.00504207	0.00541445
81.395	0.790027	0.807142	0.797435									81.395	0.0064352	0.00500877	0.00537004
81.455	0.790342	0.807717	0.797886									81.455	0.00641878	0.00496186	0.00534702
81.576	0.790984	0.808538	0.798323									81.576	0.0063761	0.00489717	0.0053082
81.694	0.791606	0.809213	0.798892									81.694	0.00634025	0.0048578	0.00526964
81.818	0.792269	0.809698	0.799626									81.818	0.00630697	0.00483298	0.00523825
81.939	0.79294	0.810005	0.800074									81.939	0.00627932	0.00483884	0.00521895
82.061	0.793649	0.81044	0.80052									82.061	0.00625496	0.0048382	0.00520951
82.151	0.794186	0.811077	0.80094									82.151	0.00623656	0.00483068	0.00520178
82.208	0.794533	0.811443	0.801405									82.208	0.0062257	0.00483503	0.00520124
82.333	0.795312	0.811845	0.801692									82.333	0.00620237	0.0048531	0.00521101
82.394	0.795692	0.812145	0.80237									82.394	0.00619159	0.00486455	0.00522528
82.515	0.796549	0.812438	0.803295									82.515	0.00617005	0.0048817	0.00525963
82.602	0.797178	0.812828	0.803888									82.602	0.0061555	0.00489783	0.00528678
82.723	0.798088	0.813162	0.80447									82.723	0.00613392	0.00491511	0.00531849
82.817	0.79881	0.81351	0.805028									82.817	0.00612509	0.0049278	0.00535481
82.939	0.799717	0.813879	0.805595									82.939	0.00611616	0.00493916	0.00539709
83.03	0.80037	0.814506	0.806088									83.03	0.0061152	0.00495392	0.00543425
83.12	0.800929	0.815065	0.806604									83.12	0.0061236	0.00496872	0.00547988
83.242	0.80166	0.815335	0.807475									83.242	0.00613255	0.00496488	0.00555381
83.302	0.802004	0.815777	0.807946									83.302	0.00615238	0.00498328	0.00559571
83.393	0.80246	0.816358	0.808582									83.393	0.00616801	0.00500786	0.00565292
83.541	0.803221	0.816664	0.80889									83.541	0.00620866	0.0050182	0.00567956
83.662	0.803834	0.817282	0.809501									83.662	0.00624875	0.00503467	0.00573243
83.753	0.804305	0.817898	0.809735									83.753	0.00627626	0.00506782	0.0057573
83.847	0.804803	0.818216	0.810119									83.847	0.00630694	0.00508157	0.00579335
83.969	0.805412	0.818909	0.810613									83.969	0.00635521	0.00512017	0.00583997
84.029	0.805715	0.819564	0.811356									84.029	0.00637598	0.00516971	0.00589491
84.15	0.806347	0.819907	0.811635									84.15	0.00641152	0.00519556	0.00591632
84.271	0.807044	0.820624	0.812291									84.271	0.00645067	0.00525525	0.00595628
84.332	0.807427	0.821502	0.812486									84.332	0.0064674	0.00532137	0.00596682
84.453	0.808233	0.821978	0.81339									84.453	0.0064964	0.00535441	0.00601294
84.574	0.809059	0.822509	0.81433									84.574	0.00652346	0.00539063	0.00605738
84.665	0.809689	0.82299	0.814737									84.665	0.00653885	0.00543323	0.00607489
84.756	0.810276	0.823308	0.815523									84.756	0.0065514	0.00545444	0.00610595
84.908	0.811177	0.823793	0.815939									84.908	0.0065704	0.0054682	0.00612271
84.938	0.811371	0.824647	0.816821									84.938	0.00657416	0.00549722	0.00615498
85.059	0.81207	0.825369	0.817511									85.059	0.00658838	0.00550917	0.0061794
85.15	0.812615	0.825918	0.818205									85.15	0.00659343	0.00551838	0.00620146
85.275	0.813374	0.826268	0.818866									85.275	0.00660065	0.00551416	0.00622205
85.362	0.814036	0.827026	0.819663									85.362	0.00660529	0.00549956	0.00625211
85.453	0.814705	0.827592	0.820236									85.453	0.00660766	0.00548339	0.00628007
85.574	0.81564	0.828356	0.820778									85.574	0.00660874	0.00545384	0.00630917
85.665	0.816364	0.828929	0.821152									85.665	0.00660394	0.00543227	0.00631482
85.726	0.816865	0.82967	0.822045									85.726	0.00659981	0.00538704	0.00635
85.847	0.817823	0.830208	0.822855									85.847	0.00658653	0.00535474	0.00634522
85.938	0.818556	0.830733	0.823677									85.938	0.00657144	0.00532057	0.00632581
86.09	0.819804	0.831277	0.824094									86.09	0.0065364	0.00528943	0.00631636
86.211	0.82078	0.831764	0.824891									86.211	0.00648257	0.0052494	0.0062901
86.272	0.821307	0.832287	0.825288									86.272	0.00647126	0.00521117	0.00627193
86.423	0.822506	0.833088	0.82626									86.423	0.00637851	0.00514933	0.00622532
86.484	0.822998	0.833621	0.826849									86.484	0.00635882	0.00510895	0.00618959
86.575	0.823666	0.834264	0.827447									86.575	0.00631709	0.00504443	0.00613057
86.666	0.824247	0.834745	0.828256									86.666	0.00626011	0.00500285	0.00606001
86.757	0.824782	0.835224	0.828861									86.757	0.00619853	0.00495474	0.00600059
86.878	0.825474	0.835702	0.829071									86.878	0.00611802	0.00490074	0.00598155
87.03	0.826376	0.836139	0.830103									87.03	0.00599008	0.0048449	0.00589262
87.09	0.826742	0.836685	0.83105									87.09	0.00593966	0.00476581	0.00580037
87.181	0.827323	0.837062	0.831637									87.181	0.00586521	0.00470293	0.00574666
87.303	0.828094	0.837413	0.832017									87.303	0.00575226	0.00463927	0.00570982
87.394	0.82865	0.837744	0.832582									87.394	0.00565628	0.00457479	0.00565818
87.515	0.829355	0.838229	0.833305									87.515	0.0055369	0.00448003	0.00558661
87.576	0.829699	0.838714	0.833848									87.576	0.0054717	0.0043834	0.00553185
87.666	0.830165	0.839181	0.834373									87.666	0.00537195	0.00428647	0.00547648
87.788	0.830756	0.839424	0.834716									87.788	0.00522979	0.00423469	0.00543746
87.909	0.831278	0.839952	0.835335									87.909	0.00508137	0.0041252	0.00535575
88	0.83168	0.840484	0.835943									88	0.00496567	0.00401873	0.00526987
88.091	0.832076	0.840862	0.836288									88.091	0.00484754	0.00393741	0.00519884
88.213	0.832602	0.841093	0.836853									88.213	0.00468684	0.0038836	0.00509537
88.334	0.833126	0.84159	0.837361									88.334	0.00452705	0.00376066	0.00497655
88.425	0.833495	0.842068	0.837721									88.425	0.00440846	0.00364041	0.00488777
88.516	0.833858	0.842417	0.838066									88.516	0.00429148	0.00355245	0.00478778
88.607	0.834226	0.842801	0.838292									88.607	0.0041752	0.00345348	0.00471721
88.728	0.834711	0.843168	0.838689									88.728	0.00402897	0.0033626	0.00455996
88.789	0.834945	0.843535	0.83899									88.789	0.00395658	0.00326141	0.00447529
88.91	0.835402	0.843863	0.839557									88.91	0.00381634	0.0031669	0.00427221
89.001	0.835738	0.844464	0.83992									89.001	0.0037176	0.00300254	0.00415283
89.092	0.836099	0.844645	0.840696									89.092	0.00361829	0.00293474	0.00391722
89.214	0.836631	0.845065	0.841185									89.214	0.00348961	0.00279872	0.00378915
89.335	0.837169	0.845415	0.841693									89.335	0.00336292	0.00266267	0.0036518
89.396	0.837393	0.845677	0.842046									89.396	0.00330578	0.00256996	0.00356938
89.548	0.837949	0.845918	0.842753									89.548	0.00315532	0.00247416	0.00340295
89.639	0.838227	0.846248	0.843398									89.639	0.00307	0.00234137	0.00324777
89.73	0.838503	0.846502	0.84374									89.73	0.00298645	0.00224027	0.00317395
89.821	0.838778	0.84676	0.844362									89.821	0.00290433	0.00213741	0.00300424
89.912	0.83904	0.846982	0.84464									89.912	0.00282174	0.00203861	0.00294678
90.063	0.839428	0.847142	0.844973									90.063	0.002688	0.00194214	0.00285571
90.124	0.839586	0.847358	0.845369									90.124	0.00263357	0.00181022	0.00274714
90.215	0.8398	0.847495	0.845494									90.215	0.00255021	0.00168752	0.00269559
90.337	0.840009	0.84757	0.845783									90.337	0.00243699	0.00162032	0.00259928
90.488	0.840212	0.847711	0.845948									90.488	0.00228613	0.00150571	0.00253191
90.549	0.840292	0.847787	0.846202									90.549	0.00222674	0.00140973	0.00242699
90.64	0.840397	0.847896	0.846329									90.64	0.00212627	0.00127219	0.00235598
90.731	0.840533	0.847966	0.846411									90.731	0.0020321	0.00118095	0.00227679
90.853	0.840778	0.848038	0.846497									90.853	0.00190001	0.00110519	0.00216365
90.974	0.841048	0.848111	0.846536									90.974	0.00176867	0.00101612	0.00203478
91.065	0.841236	0.848148	0.846536									91.065	0.00167112	0.000935323	0.00193646
91.156	0.841401	0.84815	0.846495									91.156	0.00157578	0.000861438	0.0018299
91.217	0.841504	0.848123	0.846428									91.217	0.00151384	0.000776397	0.00171429
91.369	0.84174	0.848029	0.846383									91.369	0.00136234	0.000650026	0.00159919
91.464	0.841903	0.847965	0.84632									91.464	0.00127599	0.000569132	0.00141115
91.551	0.842062	0.847948	0.846316									91.551	0.00120042	0.000500146	0.00133475
91.642	0.84225	0.847964	0.84631									91.642	0.00113747	0.000397237	0.00122472
91.733	0.842446	0.847981	0.846402									91.733	0.00105816	0.000348558	0.00108177
91.855	0.842701	0.848037	0.846449									91.855	0.000976879	0.000256629	0.000994917
91.946	0.84287	0.848081	0.846631									91.946	0.000911822	0.00018744	0.000873099
92.102	0.843052	0.848127	0.846809									92.102	0.000823538	0.000121354	0.000823479
92.189	0.843108	0.848195	0.847253									92.189	0.000780919	3.81827e-05	0.000718366
92.31	0.843136	0.848242	0.847452									92.31	0.000718035	-1.58718e-05	0.000684866
92.371	0.843154	0.848278	0.847773									92.371	0.000684744	-6.72065e-05	0.000658423
92.493	0.843159	0.848325	0.848155									92.493	0.00061546	-0.000130643	0.000624637
92.584	0.843164	0.848354	0.848486									92.584	0.000561824	-0.000179829	0.000610584
92.675	0.843113	0.848394	0.848625									92.675	0.000506826	-0.00024069	0.000621635
92.766	0.843076	0.848457	0.848884									92.766	0.000450792	-0.00030075	0.000650147
92.857	0.842972	0.848503	0.848926									92.857	0.000393909	-0.000359415	0.00067271
92.952	0.842839	0.848523	0.848891									92.952	0.000333893	-0.000372361	0.000701569
93.07	0.842676	0.848502	0.848802									93.07	0.000258525	-0.000432303	0.000721829
93.191	0.842549	0.84848	0.84871									93.191	0.000181026	-0.000461471	0.00074596
93.283	0.842483	0.848408	0.848625									93.283	0.000121982	-0.000504965	0.00075707
93.343	0.842494	0.848348	0.848377									93.343	8.34425e-05	-0.000563452	0.000777868
93.495	0.842478	0.848239	0.848096									93.495	-1.30774e-05	-0.000607445	0.000795415
93.556	0.8425	0.848082	0.847924									93.556	-5.20871e-05	-0.000666067	0.000803844
93.742	0.84263	0.847927	0.847712									93.742	-0.000168962	-0.000710628	0.000819606
93.739	0.842629	0.847737	0.847608									93.739	-0.000166616	-0.000770194	0.00083077
93.891	0.842794	0.847624	0.847611									93.891	-0.000260222	-0.000815491	0.000842198
93.982	0.842903	0.847512	0.847635									93.982	-0.000315741	-0.000876015	0.000852655
94.073	0.842997	0.84743	0.84773									94.073	-0.000370322	-0.000921535	0.000863917
94.194	0.842876	0.847316	0.847887									94.194	-0.000442717	-0.00098333	0.000878864
94.286	0.842776	0.847256	0.847991									94.286	-0.000497386	-0.00101347	0.000889676
94.377	0.842681	0.847134	0.848141									94.377	-0.000550272	-0.00107524	0.000901984
94.498	0.842561	0.847055	0.848339									94.498	-0.000621188	-0.00112179	0.000919517
94.559	0.84249	0.846891	0.848486									94.559	-0.0006558	-0.0011995	0.000932528
94.741	0.8423	0.846861	0.848665									94.741	-0.000760027	-0.00123107	0.000952079
94.772	0.842261	0.84674	0.84884									94.772	-0.000777641	-0.00129242	0.000972593
94.924	0.842052	0.846654	0.849016									94.924	-0.000863181	-0.00133702	0.000995077
94.985	0.841964	0.846561	0.849112									94.985	-0.000898824	-0.00138597	0.00100719
95.045	0.841891	0.846485	0.849253									95.045	-0.000931886	-0.00144779	0.00102549
			0.849422												0.00105163
			0.849513												0.00106519
			0.849696												0.00109306
	Ti [°C]	Ti [°C]	0.849825										Ti [°C]	Ti [°C]	0.00111463
	77.5036	77.345	0.84999										77.5036	77.345	0.00114549
	85.4909	85.1446											85.4909	85.1446
		78.1935												78.1935
		84.1993	Ti [°C]											84.1993	Ti [°C]
			76.5448												76.5448
		78.7642	85.317											78.7642	85.317
		85.1386												85.1386
			58.2941												58.2941
		78.4418	67.9024											78.4418	67.9024
		85.0918												85.0918
		78.0361												78.0361
			53.1284												53.1284
			62.5117												62.5117
			84.3167												84.3167

## Sheet: Peptide2
Measured at:														Measured at:			2023-04-20 12:08:52
Keywords:														Keywords:			Dani-NCS1deltaH10-Ric8ap2
Device:														Device:			T6-204
NCS-1/Ric-8A-P2	REPEAT 1	REPEAT 2	REPEAT 3											NCS-1/Ric-8A-P2 (First derivative)	REPEAT 1	REPEAT 2	REPEAT 3
Temperature [°C]	Ratio 350 nm / 330 nm	Ratio 350 nm / 330 nm	Ratio 350 nm / 330 nm											Temperature [°C]	Ratio 350 nm / 330 nm	Ratio 350 nm / 330 nm	Ratio 350 nm / 330 nm
35.114	0.75398	0.755177	0.757302											35.107	0.000537042	0.000485536	0.000191238
35.259	0.754048	0.755253	0.757316											35.252	0.00053807	0.000485772	0.000208397
35.409	0.75412	0.755316	0.757341											35.372	0.000538935	0.000486017	0.000229751
35.528	0.754178	0.755379	0.757362											35.491	0.000539805	0.000486212	0.000246523
35.647	0.754231	0.755443	0.757377											35.61	0.000540688	0.000486409	0.000263166
35.767	0.754291	0.75551	0.757406											35.73	0.000541591	0.000486606	0.000279719
35.856	0.754332	0.755593	0.757426											35.883	0.000542767	0.000486752	0.000295984
35.946	0.754377	0.755678	0.757449											36.032	0.000543931	0.000486901	0.000311443
36.069	0.754439	0.755722	0.757471											36.121	0.000544638	0.000487105	0.000323429
36.158	0.75448	0.75577	0.757498											36.207	0.000545329	0.000487252	0.000339602
36.244	0.754519	0.755833	0.757526											36.326	0.000546296	0.000487397	0.000354571
36.333	0.754565	0.755868	0.757543											36.39	0.000546823	0.000487545	0.000362092
36.456	0.754623	0.755917	0.757572											36.479	0.000547563	0.000487752	0.00037721
36.542	0.754664	0.755979	0.7576											36.595	0.000548538	0.000487896	0.000389225
36.662	0.754725	0.75603	0.757632											36.688	0.000549331	0.0004881	0.000403237
36.751	0.754766	0.756078	0.757668											36.778	0.000550105	0.000488251	0.000417593
36.87	0.754824	0.756127	0.757686											36.867	0.000550881	0.000488455	0.000424563
36.96	0.754868	0.756209	0.757721											37.016	0.000552195	0.00048861	0.000438531
37.049	0.754912	0.75624	0.757746											37.072	0.000552694	0.000488764	0.000448384
37.169	0.754971	0.756292	0.757782											37.165	0.000553531	0.000488972	0.000462304
37.258	0.755015	0.756354	0.757809											37.281	0.000554586	0.000489128	0.000468902
37.348	0.755057	0.756406	0.757864											37.375	0.000555449	0.000489286	0.00048221
37.437	0.755104	0.756454	0.757897											37.464	0.000556274	0.000489443	0.000492009
37.557	0.755161	0.756518	0.757941											37.583	0.000557387	0.000489656	0.000501884
37.71	0.755235	0.756568	0.757987											37.673	0.000558237	0.000489929	0.000511644
37.796	0.755278	0.756617	0.758051											37.763	0.000559095	0.000490082	0.000524865
37.915	0.755336	0.756665	0.758104											37.852	0.000559953	0.000490295	0.000534758
37.975	0.755365	0.756729	0.758163											37.971	0.000561121	0.000490402	0.000544852
38.064	0.755409	0.756778	0.758223											38.061	0.000562031	0.00049056	0.000554908
38.154	0.755454	0.756825	0.758309											38.147	0.000562935	0.000490721	0.000568316
38.273	0.755512	0.756891	0.758398											38.27	0.000564754	0.000491025	0.000575476
38.393	0.755571	0.756955	0.758474											38.389	0.000566403	0.000491368	0.000581089
38.512	0.75563	0.756984	0.758561											38.445	0.000567417	0.000491682	0.000589635
38.602	0.755674	0.757017	0.75866											38.505	0.000568204	0.000492031	0.000594802
38.695	0.755719	0.75708	0.758729											38.624	0.000570261	0.000492377	0.000596189
38.751	0.755747	0.757147	0.758799											38.748	0.000572584	0.00049256	0.000599599
38.87	0.755805	0.757227	0.758861											38.897	0.00057523	0.000493117	0.000601923
39.02	0.755879	0.757275	0.758916											38.986	0.000576835	0.000493874	0.000603424
39.083	0.755909	0.757321	0.758972											39.072	0.000578595	0.000494133	0.000602806
39.203	0.755969	0.757353	0.759036											39.132	0.000579734	0.000494795	0.000600675
39.318	0.756024	0.757417	0.759082											39.251	0.000582074	0.000495326	0.000597969
39.378	0.756054	0.757466	0.759125											39.341	0.000583795	0.000495704	0.000594656
39.472	0.7561	0.757517	0.759183											39.434	0.000585622	0.000496162	0.000589211
39.591	0.756158	0.757583	0.759229											39.554	0.000587933	0.000496764	0.000584372
39.707	0.756214	0.757667	0.759275											39.703	0.000590679	0.000497279	0.000579092
39.826	0.756272	0.757718	0.759322											39.793	0.000592288	0.000497735	0.000573911
39.946	0.75633	0.757771	0.759371											39.882	0.000593847	0.000498149	0.000568542
40.009	0.75636	0.757826	0.759423											39.972	0.000595459	0.000498315	0.000563764
40.099	0.756404	0.757898	0.759496											40.088	0.00059722	0.000498492	0.000556996
40.214	0.756459	0.757938	0.759591											40.151	0.000598167	0.000498564	0.000548594
40.274	0.756487	0.758014	0.759668											40.271	0.00060005	0.000498554	0.000545349
40.394	0.756545	0.758072	0.75974											40.361	0.000601271	0.000498203	0.00054428
40.513	0.756601	0.758131	0.759793											40.45	0.000601809	0.000497757	0.000543844
40.603	0.756644	0.758188	0.759839											40.536	0.000602936	0.000497305	0.000544403
40.722	0.756701	0.758249	0.759883											40.629	0.000603902	0.000496742	0.000546177
40.846	0.756759	0.758351	0.759924											40.779	0.000605444	0.000495593	0.000547366
40.901	0.756785	0.758433	0.75995											40.898	0.000606076	0.00049527	0.000549979
41.021	0.756842	0.758495	0.759996											40.988	0.000606832	0.000493149	0.000555966
41.115	0.756887	0.758556	0.760045											41.077	0.000607269	0.000492069	0.000564786
41.204	0.756929	0.758614	0.760083											41.163	0.000607589	0.000490157	0.000570207
41.32	0.756985	0.758677	0.760114											41.257	0.00060781	0.000487951	0.000575826
41.439	0.757042	0.758756	0.760165											41.376	0.000607956	0.00048569	0.000587019
41.499	0.75707	0.758795	0.760209											41.436	0.00060778	0.000484686	0.000593673
41.619	0.757127	0.75885	0.760234											41.522	0.000607883	0.000481227	0.000599462
41.708	0.757169	0.758926	0.7603											41.642	0.000607694	0.000478802	0.000609091
41.828	0.757226	0.759019	0.760372											41.795	0.000606962	0.00047476	0.000617912
41.948	0.757282	0.759071	0.760445											41.881	0.000606872	0.000471279	0.000626564
42.067	0.757335	0.759124	0.760487											41.97	0.000606227	0.000467193	0.000630249
42.131	0.757364	0.759194	0.760523											42.094	0.000605093	0.000464639	0.000633627
42.25	0.757418	0.759228	0.760618											42.153	0.000604399	0.000460524	0.000641696
42.31	0.757445	0.759295	0.760676											42.273	0.000603277	0.000458445	0.000645105
42.426	0.757498	0.759326	0.760731											42.329	0.000602449	0.0004534	0.000647482
42.519	0.757539	0.759392	0.76081											42.448	0.000601055	0.000449673	0.00065268
42.639	0.757591	0.75944	0.76087											42.538	0.000599459	0.000444752	0.000655069
42.755	0.757641	0.759537	0.760958											42.718	0.000596429	0.000439916	0.000656026
42.874	0.75769	0.759587	0.761019											42.811	0.000594455	0.000434894	0.000657134
42.968	0.757729	0.75962	0.761089											42.871	0.000593262	0.000430893	0.000656995
43.028	0.757754	0.759668	0.761186											42.96	0.000591105	0.000428313	0.000658462
43.114	0.757789	0.759733	0.761254											43.08	0.000587819	0.00042462	0.000660566
43.233	0.75784	0.759782	0.761335											43.17	0.000584867	0.000419598	0.000661315
43.386	0.757899	0.759815	0.761387											43.23	0.000582644	0.000413339	0.000661763
43.476	0.757937	0.759881	0.761489											43.349	0.000578842	0.000409784	0.000662893
43.562	0.757975	0.759981	0.761627											43.529	0.000571812	0.000406502	0.000666475
43.652	0.758009	0.760013	0.761727											43.585	0.000569076	0.000403208	0.000664593
43.741	0.758043	0.760079	0.761802											43.704	0.000563323	0.000400073	0.000663926
43.861	0.758093	0.76013	0.761868											43.794	0.000559864	0.000396119	0.000661579
43.955	0.758131	0.760166	0.761943											43.858	0.000556534	0.000393874	0.000660296
44.074	0.758178	0.760217	0.762012											43.947	0.000551414	0.000390119	0.000659685
44.13	0.758201	0.760286	0.762085											44.067	0.000545657	0.000388655	0.000656045
44.254	0.758251	0.760339	0.76214											44.157	0.000540343	0.000386414	0.000651959
44.373	0.758299	0.760408	0.762193											44.276	0.000532578	0.000384173	0.000647495
44.459	0.758334	0.760478	0.762244											44.396	0.000524763	0.000382221	0.000643385
44.583	0.758384	0.760531	0.762294											44.486	0.000518176	0.000380602	0.000637994
44.703	0.758434	0.760564	0.762362											44.546	0.000513983	0.000378963	0.000629705
44.758	0.758456	0.760613	0.762429											44.632	0.000508288	0.000379424	0.000620327
44.878	0.758505	0.760681	0.762479											44.751	0.000499538	0.000378824	0.00061253
44.968	0.758543	0.760736	0.76253											44.845	0.000492117	0.000378211	0.000604195
45.088	0.758593	0.760805	0.762577											44.965	0.000483207	0.000378361	0.000596278
45.177	0.758631	0.76088	0.762646											45.114	0.000471286	0.00037902	0.000583956
45.267	0.75867	0.760926	0.762662											45.204	0.000463728	0.000379218	0.000581573
45.361	0.758709	0.760959	0.762755											45.264	0.000459233	0.000380345	0.000561471
45.476	0.758757	0.76102	0.762813											45.383	0.000449025	0.000381543	0.000549646
45.566	0.758794	0.761048	0.762841											45.443	0.000443966	0.000382632	0.000542866
45.716	0.758857	0.761115	0.76288											45.593	0.000431623	0.000384871	0.000533764
45.836	0.758907	0.761151	0.762949											45.682	0.000424096	0.000386574	0.000518391
45.955	0.758958	0.761181	0.762988											45.772	0.000416531	0.000388848	0.000509891
46.015	0.758982	0.761219	0.763041											45.862	0.000409091	0.000390154	0.000499013
46.105	0.759019	0.76125	0.763082											45.948	0.000402211	0.000391982	0.000491043
46.199	0.759059	0.761294	0.763125											46.072	0.00039154	0.000393937	0.000483363
46.314	0.759105	0.761331	0.763172											46.191	0.000382204	0.000396387	0.000475856
46.408	0.759143	0.761362	0.763221											46.281	0.000375477	0.000398426	0.00046797
46.498	0.759179	0.76139	0.763273											46.367	0.000368953	0.000400365	0.000461268
46.584	0.759214	0.761417	0.763326											46.457	0.000361734	0.000402194	0.000454173
46.674	0.75925	0.761441	0.763397											46.55	0.000354774	0.000404067	0.000445741
46.764	0.759286	0.761467	0.763467											46.64	0.000348414	0.000405872	0.000436698
46.913	0.759345	0.761511	0.763534											46.79	0.000337697	0.000408666	0.000426926
47.033	0.759393	0.761536	0.763582											46.88	0.000332461	0.000410899	0.000420326
47.093	0.759417	0.761567	0.763611											47	0.000325708	0.000411674	0.000416281
47.216	0.759465	0.761584	0.76367											47.059	0.000321177	0.000413041	0.000408034
47.332	0.75951	0.76161	0.763725											47.149	0.000316338	0.000414521	0.000400068
47.426	0.759548	0.761643	0.763776											47.269	0.000310925	0.000415053	0.000393387
47.512	0.759582	0.761677	0.763799											47.389	0.000306116	0.000415562	0.000389776
47.606	0.759618	0.761702	0.763833											47.479	0.000301865	0.000416267	0.000385379
47.666	0.759642	0.761737	0.763854											47.598	0.00029806	0.000416754	0.000383789
47.811	0.759698	0.761755	0.763893											47.658	0.000295607	0.000416033	0.000377281
47.935	0.759747	0.761792	0.763936											47.778	0.000292166	0.00041527	0.000375121
48.051	0.759792	0.761829	0.763959											47.898	0.000289796	0.000413922	0.000374154
48.111	0.759815	0.761857	0.763996											47.984	0.000287528	0.000413109	0.000374448
48.231	0.759861	0.761867	0.764003											48.014	0.000287556	0.000410427	0.000374901
48.321	0.759896	0.761916	0.764018											48.163	0.00028562	0.000408459	0.000378515
48.41	0.759929	0.761946	0.764032											48.253	0.000284898	0.000406308	0.000375929
48.534	0.759976	0.761998	0.764046											48.407	0.000284006	0.000403095	0.000380654
48.654	0.76002	0.762039	0.764067											48.527	0.000284602	0.000398432	0.000384116
48.77	0.760063	0.762068	0.764087											48.613	0.000284596	0.000394303	0.000386915
48.83	0.760084	0.762078	0.764109											48.643	0.000285201	0.000392446	0.00039091
48.949	0.760126	0.76212	0.764144											48.766	0.000285665	0.00038676	0.000392003
49.043	0.760159	0.762159	0.76418											48.882	0.000287385	0.000381136	0.000395447
49.133	0.760192	0.7622	0.764213											49.006	0.00028964	0.000375896	0.000397757
49.219	0.760222	0.762219	0.764242											49.066	0.000290058	0.000370794	0.000399209
49.369	0.760273	0.762259	0.764288											49.186	0.000292301	0.000361265	0.00040049
49.433	0.760291	0.762298	0.764347											49.305	0.000294935	0.000356048	0.000400851
49.553	0.760333	0.762334	0.764363											49.425	0.000297629	0.000346987	0.000401327
49.669	0.760369	0.762352	0.764431											49.485	0.000298759	0.000336901	0.000399118
49.762	0.7604	0.762379	0.764474											49.575	0.000300721	0.000329012	0.000397157
49.852	0.760429	0.762406	0.764522											49.665	0.000302676	0.000321097	0.000390927
49.938	0.760455	0.76244	0.764577											49.785	0.000305242	0.000313886	0.000387671
50.032	0.760484	0.762473	0.764651											49.905	0.000307726	0.000305453	0.00038268
50.152	0.760521	0.762488	0.764685											49.965	0.000308896	0.000292688	0.000379399
50.268	0.760555	0.762513	0.764747											50.051	0.000310392	0.000281031	0.000372403
50.362	0.760581	0.762539	0.764796											50.144	0.000312091	0.000271513	0.000369359
50.512	0.760618	0.762577	0.764862											50.294	0.000314356	0.000255686	0.000361312
50.571	0.760632	0.762619	0.764914											50.444	0.00031569	0.000248917	0.0003521
50.658	0.760653	0.762635	0.764963											50.504	0.000316572	0.000239279	0.000345368
50.718	0.760666	0.76266	0.765014											50.594	0.000317575	0.000232406	0.000335835
50.837	0.760699	0.762684	0.765048											50.684	0.00031739	0.00021914	0.000332943
50.957	0.760732	0.762708	0.765124											50.77	0.000318022	0.000205481	0.00032222
51.077	0.760751	0.762735	0.765178											50.864	0.000316948	0.00019173	0.000313567
51.231	0.760775	0.76277	0.76523											50.984	0.000315944	0.000174084	0.000303256
51.321	0.760795	0.762795	0.765271											51.07	0.000314198	0.000163674	0.000295383
51.411	0.760812	0.762841	0.76531											51.223	0.000311295	0.000153401	0.000282283
51.467	0.760826	0.762868	0.765338											51.313	0.000309158	0.000147412	0.000274591
51.561	0.76084	0.762896	0.76537											51.403	0.000307466	0.000136655	0.000257788
51.707	0.760865	0.762923	0.765385											51.489	0.000306259	0.000120505	0.000247133
51.8	0.760874	0.762951	0.765395											51.579	0.000302169	0.000110373	0.000235233
51.887	0.760885	0.76299	0.765402											51.703	0.000295448	0.000101358	0.000218531
52.007	0.7609	0.76301	0.765398											51.763	0.000292682	8.80346e-05	0.000209847
52.067	0.760905	0.763037	0.765394											51.853	0.00028821	8.21021e-05	0.000197793
52.19	0.760917	0.763077	0.765386											51.973	0.000282442	6.96779e-05	0.000181782
52.247	0.760921	0.763103	0.765378											52.063	0.000277058	6.40387e-05	0.000173295
52.366	0.760934	0.763139	0.765373											52.183	0.000270019	5.21339e-05	0.00016144
52.49	0.76094	0.76318	0.765371											52.333	0.000258775	4.12965e-05	0.000156814
52.576	0.760944	0.763201	0.765366											52.393	0.000254838	3.29352e-05	0.000151105
52.726	0.760946	0.763235	0.765364											52.513	0.000244883	1.98932e-05	0.000142893
52.82	0.760952	0.763258	0.765361											52.603	0.00023751	1.18484e-05	0.000132789
52.91	0.760955	0.763274	0.765356											52.663	0.000232429	4.41664e-06	0.000132023
53	0.760954	0.7633	0.765351											52.753	0.000223943	-2.8076e-06	0.000127409
53.12	0.760955	0.763335	0.765354											52.903	0.000211256	-1.24842e-05	0.000122864
53.21	0.760954	0.763362	0.765353											52.993	0.000202987	-1.92086e-05	0.000129323
53.33	0.760952	0.763385	0.765361											53.113	0.000191552	-2.72382e-05	0.000131514
53.446	0.760949	0.763397	0.765369											53.173	0.00018588	-3.53076e-05	0.000135159
53.48	0.760948	0.763416	0.765377											53.293	0.000174427	-3.7931e-05	0.000142579
53.6	0.760944	0.76343	0.765389											53.383	0.000165628	-4.58987e-05	0.000150327
53.686	0.76094	0.763451	0.765397											53.502	0.000153847	-5.14304e-05	0.000158108
53.78	0.760936	0.763457	0.765408											53.563	0.00014778	-5.72915e-05	0.000166378
53.96	0.760927	0.763469	0.765421											53.653	0.00013898	-6.81482e-05	0.00017465
54.016	0.760923	0.763478	0.765433											53.743	0.000130251	-7.12831e-05	0.000181964
54.17	0.760912	0.763498	0.765456											53.893	0.000115298	-8.01488e-05	0.000191629
54.26	0.760905	0.763507	0.765485											54.013	0.000103602	-8.51847e-05	0.000201627
54.317	0.760901	0.76351	0.765497											54.073	9.81214e-05	-8.82594e-05	0.000204349
54.41	0.760893	0.763522	0.76553											54.223	8.35386e-05	-9.31434e-05	0.000213156
54.56	0.76088	0.763528	0.765578											54.313	7.47868e-05	-0.000100725	0.000215392
54.65	0.760872	0.763536	0.765598											54.433	6.40743e-05	-0.000105124	0.000221489
54.737	0.760861	0.763539	0.765639											54.463	6.13868e-05	-0.00010945	0.00022423
54.857	0.760847	0.763545	0.765669											54.583	5.04162e-05	-0.000115148	0.000224765
54.947	0.760836	0.76355	0.76572											54.703	4.0442e-05	-0.000119331	0.000229815
55.01	0.760826	0.763554	0.765771											54.823	3.08449e-05	-0.000122302	0.000224387
55.1	0.760813	0.76356	0.7658											54.913	2.36491e-05	-0.000126259	0.000225078
55.217	0.760799	0.763562	0.76584											55.003	1.63509e-05	-0.00013141	0.000220441
55.37	0.760776	0.763563	0.765878											55.093	9.61996e-06	-0.000138007	0.000219078
55.431	0.760767	0.763565	0.765941											55.183	3.14011e-06	-0.000140405	0.000217727
55.577	0.760743	0.763566	0.765976											55.273	-3.07625e-06	-0.000146409	0.000216175
55.671	0.760727	0.763565	0.76603											55.393	-1.12949e-05	-0.000149753	0.000213788
55.761	0.760711	0.763563	0.766055											55.483	-1.68517e-05	-0.000153327	0.000213293
55.851	0.760694	0.76356	0.766071											55.573	-2.1387e-05	-0.000156666	0.000213083
55.941	0.760677	0.763558	0.766096											55.693	-2.8258e-05	-0.000159898	0.000212115
56.031	0.76066	0.763552	0.76611											55.843	-3.53222e-05	-0.000163039	0.000211739
56.121	0.760643	0.763547	0.766111											55.933	-3.97864e-05	-0.000166277	0.000213121
56.211	0.760624	0.763544	0.766116											55.993	-4.26841e-05	-0.000169233	0.000211703
56.391	0.760589	0.763539	0.766124											56.084	-4.62673e-05	-0.00017484	0.000214485
56.511	0.760563	0.763528	0.766116											56.234	-5.04836e-05	-0.000178171	0.000213896
56.602	0.760545	0.763523	0.766119											56.324	-5.36203e-05	-0.000180701	0.000215253
56.692	0.760526	0.763518	0.766121											56.384	-5.56712e-05	-0.000183127	0.000213847
56.752	0.760514	0.763508	0.76612											56.504	-5.84367e-05	-0.00018447	0.000214764
56.812	0.760502	0.763502	0.766119											56.564	-5.85224e-05	-0.000186215	0.000214633
56.992	0.760466	0.763492	0.766123											56.684	-6.03322e-05	-0.000190537	0.000211403
57.082	0.760448	0.763483	0.766136											56.804	-6.1736e-05	-0.000192526	0.000207653
57.202	0.760424	0.763475	0.766153											56.891	-6.35345e-05	-0.000195066	0.000203007
57.262	0.760412	0.763464	0.766169											57.015	-6.39679e-05	-0.00019642	0.000198299
57.352	0.760395	0.763454	0.766189											57.135	-6.24401e-05	-0.000197962	0.000194715
57.473	0.760372	0.763445	0.76621											57.255	-6.22658e-05	-0.000200123	0.000189863
57.593	0.76035	0.76344	0.766232											57.315	-6.22837e-05	-0.00020222	0.000184706
57.713	0.760329	0.763435	0.766262											57.375	-6.07809e-05	-0.000204024	0.000180297
57.803	0.760313	0.763425	0.766268											57.495	-5.87721e-05	-0.000205094	0.000178072
57.893	0.760298	0.763419	0.766302											57.581	-5.68946e-05	-0.00020636	0.000174474
57.983	0.760282	0.763409	0.766315											57.735	-5.30924e-05	-0.000207463	0.000173073
58.104	0.760262	0.763406	0.766339											57.795	-5.18078e-05	-0.000208837	0.000172046
58.193	0.760246	0.763399	0.766357											57.916	-4.77804e-05	-0.000209763	0.000172785
58.254	0.760236	0.763394	0.766386											58.036	-4.26516e-05	-0.000210359	0.000176585
58.344	0.760221	0.76339	0.766413											58.126	-3.88816e-05	-0.000211245	0.000181827
58.464	0.7602	0.763387	0.766434											58.216	-3.47929e-05	-0.00021218	0.000187285
58.584	0.76018	0.763385	0.766453											58.306	-3.04987e-05	-0.0002131	0.000193898
58.734	0.760153	0.763383	0.766473											58.396	-2.59516e-05	-0.000213954	0.000201616
58.795	0.760142	0.763384	0.766497											58.486	-2.11915e-05	-0.000214278	0.000210116
58.915	0.76012	0.763379	0.766535											58.637	-1.24648e-05	-0.000214809	0.000222432
59.005	0.760102	0.763382	0.766546											58.727	-7.47704e-06	-0.000215111	0.000228867
59.125	0.760079	0.763379	0.766572											58.813	-2.43449e-06	-0.000215408	0.000238671
59.215	0.76006	0.763382	0.766616											58.903	3.22544e-06	-0.000215431	0.000251863
59.306	0.760041	0.763387	0.766653											58.997	9.3902e-06	-0.000215454	0.000265151
59.396	0.760022	0.763391	0.766679											59.087	1.51535e-05	-0.000215698	0.000273839
59.486	0.760003	0.763394	0.766702											59.208	2.31775e-05	-0.000215724	0.000282354
59.636	0.75997	0.7634	0.766723											59.328	3.13027e-05	-0.000214987	0.000290207
59.726	0.759949	0.763404	0.76674											59.388	3.53548e-05	-0.000214581	0.000297345
59.846	0.759922	0.763411	0.766759											59.508	4.34488e-05	-0.000213843	0.000305767
59.937	0.759901	0.763418	0.766775											59.628	5.11805e-05	-0.00021318	0.000313684
60.027	0.75988	0.763427	0.766786											59.749	5.90469e-05	-0.00021242	0.000317631
60.117	0.759859	0.76343	0.766803											59.809	6.28828e-05	-0.00021153	0.000321913
60.237	0.759831	0.763435	0.766819											59.895	6.82841e-05	-0.000210631	0.000325214
60.327	0.75981	0.763443	0.766839											59.989	7.41339e-05	-0.00020897	0.000329757
60.418	0.759789	0.763455	0.766842											60.109	8.13365e-05	-0.000207456	0.000333455
60.508	0.759768	0.763465	0.766856											60.23	8.89454e-05	-0.000206324	0.000337944
60.598	0.759747	0.763471	0.766877											60.29	9.19939e-05	-0.000205041	0.000340733
60.718	0.759718	0.76348	0.766924											60.41	9.83899e-05	-0.000202858	0.000348045
60.865	0.759685	0.763489	0.766965											60.53	0.000104376	-0.000199926	0.00035517
60.959	0.759664	0.763498	0.767003											60.62	0.000108529	-0.000197794	0.000361158
61.079	0.759638	0.763507	0.767029											60.711	0.000112556	-0.000195132	0.000365438
61.139	0.759623	0.763516	0.767089											60.801	0.000116732	-0.000193789	0.000374055
61.229	0.759603	0.763524	0.767155											60.891	0.000120225	-0.000191693	0.000382781
61.35	0.759577	0.763533	0.767228											60.981	0.000123062	-0.000188813	0.000394819
61.47	0.75955	0.763545	0.767265											61.102	0.000127096	-0.000185992	0.000398777
61.56	0.759532	0.763562	0.767323											61.252	0.000131746	-0.000183791	0.000407922
61.647	0.759516	0.76357	0.767419											61.342	0.000134213	-0.000181657	0.000420833
61.771	0.759492	0.763579	0.767477											61.433	0.000136616	-0.000178689	0.000428069
61.861	0.759476	0.763589	0.767546											61.523	0.000138826	-0.000176618	0.000434861
61.948	0.759461	0.7636	0.767595											61.613	0.000141199	-0.000174527	0.000442319
62.042	0.759446	0.76361	0.767623											61.703	0.000142613	-0.000172394	0.000443915
62.162	0.759429	0.763624	0.767665											61.823	0.00014511	-0.000169732	0.000448651
62.279	0.759411	0.763636	0.767714											61.914	0.000146952	-0.000166931	0.000455266
62.373	0.759396	0.763651	0.767761											62.034	0.000149421	-0.000165332	0.000459213
62.463	0.759385	0.76366	0.767807											62.094	0.000150543	-0.000163575	0.000462458
62.523	0.759378	0.763672	0.767839											62.184	0.000152218	-0.000162427	0.00046511
62.674	0.759359	0.763686	0.767873											62.275	0.000153914	-0.000159773	0.00046782
62.764	0.759348	0.763705	0.76791											62.395	0.000156274	-0.000158308	0.00047079
62.884	0.759332	0.763721	0.767964											62.485	0.000158008	-0.0001565	0.000475619
62.974	0.759321	0.763753	0.767993											62.666	0.000161854	-0.000155246	0.000478573
63.095	0.759305	0.763774	0.768056											62.786	0.000164661	-0.000153981	0.000483612
63.155	0.759297	0.763791	0.768119											62.876	0.000167277	-0.000153036	0.000494112
63.215	0.759289	0.763808	0.768151											62.967	0.000169849	-0.000152407	0.000496993
63.366	0.759269	0.763826	0.768209											63.057	0.000172452	-0.000150919	0.000508775
63.516	0.759248	0.763849	0.768251											63.177	0.000176292	-0.000149503	0.000519075
63.606	0.759236	0.763861	0.768298											63.238	0.000177419	-0.000148885	0.000537764
63.727	0.759218	0.763879	0.768334											63.328	0.000181149	-0.000148136	0.000553238
63.757	0.759213	0.763892	0.768364											63.388	0.000182958	-0.000148111	0.000565381
63.877	0.759196	0.763916	0.768393											63.508	0.000187264	-0.000147388	0.000582755
63.994	0.759179	0.763939	0.768421											63.629	0.000193506	-0.000146936	0.000593526
64.118	0.759159	0.763964	0.76845											63.749	0.000200364	-0.000146442	0.000610688
64.205	0.759145	0.763976	0.768497											63.809	0.000203801	-0.000146112	0.000641277
64.299	0.75913	0.763993	0.768553											63.9	0.000209151	-0.00014576	0.000671405
64.389	0.759116	0.76402	0.768579											64.02	0.000216837	-0.000145424	0.000681028
64.479	0.759101	0.764048	0.768624											64.144	0.000225474	-0.000145156	0.000699444
64.57	0.759086	0.764075	0.768652											64.261	0.000233513	-0.000144778	0.000711011
64.69	0.759067	0.764103	0.768739											64.381	0.000244154	-0.000144051	0.000733446
64.81	0.759047	0.764117	0.768789											64.438	0.00024863	-0.000143524	0.000745458
64.931	0.759027	0.764136	0.768895											64.502	0.000255068	-0.000142678	0.000767621
65.051	0.759007	0.764165	0.769008											64.622	0.000265752	-0.000141623	0.000789025
65.142	0.758992	0.764207	0.769146											64.773	0.000282687	-0.000140405	0.000809985
65.232	0.758977	0.764238	0.769244											64.893	0.000295291	-0.000139602	0.000825972
65.262	0.758972	0.764266	0.769336											64.983	0.000306304	-0.000139516	0.000842902
65.413	0.758948	0.764292	0.769477											65.074	0.000316629	-0.00013668	0.000865748
65.503	0.758933	0.764305	0.769596											65.134	0.000324195	-0.000135113	0.000888515
65.624	0.758914	0.764332	0.769654											65.224	0.000335527	-0.000132343	0.00090031
65.744	0.758895	0.764373	0.769766											65.345	0.000351859	-0.000130005	0.000923884
65.804	0.758887	0.764415	0.769822											65.465	0.000367551	-0.000128571	0.000934776
65.925	0.758869	0.764436	0.769908											65.525	0.000375765	-0.000125334	0.000954937
66.045	0.758851	0.764468	0.770046											65.616	0.000387623	-0.000122056	0.000988289
66.166	0.758834	0.764509	0.770133											65.736	0.00040527	-0.000118173	0.00100959
66.256	0.758823	0.764567	0.770223											65.887	0.000427331	-0.000114679	0.00103084
66.377	0.758808	0.764605	0.77032											65.977	0.000440669	-0.000110431	0.00104983
66.437	0.7588	0.764643	0.770458											66.068	0.000454262	-0.000107357	0.00107552
66.527	0.75879	0.764683	0.770555											66.158	0.000467761	-0.000104261	0.0010936
66.618	0.758781	0.764724	0.770662											66.248	0.000481228	-0.000100212	0.00110908
66.734	0.75877	0.764767	0.770801											66.339	0.000494803	-9.48162e-05	0.00113054
66.825	0.758763	0.764797	0.77096											66.399	0.0005036	-8.9885e-05	0.00114561
66.979	0.75875	0.764842	0.771107											66.486	0.000516329	-8.21396e-05	0.00115573
67.07	0.758745	0.764903	0.771142											66.61	0.000534221	-7.67853e-05	0.00115974
67.16	0.758741	0.764975	0.771251											66.734	0.000552118	-7.1595e-05	0.00116748
67.281	0.758737	0.765047	0.771425											66.851	0.000567729	-6.42501e-05	0.00117179
67.341	0.758733	0.765101	0.771563											66.941	0.000579646	-6.05016e-05	0.0011717
67.461	0.758732	0.765176	0.771664											67.062	0.000595285	-5.26721e-05	0.00116492
67.582	0.758734	0.765215	0.771775											67.122	0.000601954	-4.47792e-05	0.00115758
67.672	0.758735	0.76527	0.771872											67.212	0.000613074	-3.83552e-05	0.00114629
67.763	0.758735	0.765367	0.771981											67.363	0.000631973	-3.17541e-05	0.00113889
67.823	0.758739	0.765431	0.772079											67.457	0.000642236	-2.72745e-05	0.00112545
67.943	0.758741	0.765494	0.772237											67.547	0.000650952	-1.79828e-05	0.00110869
68.064	0.758745	0.76556	0.77234											67.634	0.000659711	-8.19162e-06	0.00109732
68.184	0.758748	0.765622	0.772492											67.725	0.000668439	1.93012e-06	0.00107993
68.245	0.75875	0.765709	0.772611											67.845	0.000680238	7.1716e-06	0.00106532
68.365	0.758755	0.765776	0.772729											67.935	0.000687777	1.82075e-05	0.00105349
68.456	0.758762	0.765867	0.772809											68.056	0.000698244	2.65164e-05	0.00104517
68.576	0.758768	0.765959	0.772973											68.181	0.000705262	3.81981e-05	0.00103294
68.697	0.758777	0.766021	0.7731											68.267	0.000710815	4.99828e-05	0.00102457
68.787	0.758783	0.766089	0.773302											68.361	0.00071736	5.86242e-05	0.0010146
68.908	0.758791	0.766155	0.773449											68.452	0.000722418	7.10533e-05	0.00100965
68.998	0.758796	0.766195	0.773541											68.508	0.000724535	8.07741e-05	0.00101076
69.063	0.758803	0.76626	0.773636											68.599	0.000728128	8.70659e-05	0.00100848
69.179	0.758815	0.766366	0.773701											68.749	0.000735409	9.95862e-05	0.00101111
69.27	0.758818	0.766454	0.773767											68.874	0.000741365	0.000109657	0.0010164
69.39	0.758832	0.766513	0.773879											68.96	0.00074346	0.000123155	0.00102117
69.511	0.758843	0.766557	0.773973											69.024	0.000744845	0.00013737	0.00103157
69.601	0.758855	0.766659	0.774037											69.175	0.000748986	0.00014799	0.00104054
69.722	0.758877	0.766723	0.774109											69.266	0.000750832	0.000162162	0.0010579
69.782	0.758884	0.766784	0.774169											69.352	0.000752415	0.000169015	0.00106494
69.873	0.758894	0.766847	0.774224											69.446	0.000753729	0.000179807	0.00108205
69.994	0.75891	0.766908	0.774274											69.533	0.000755038	0.000194091	0.00109464
70.114	0.758934	0.766993	0.774348											69.654	0.000756674	0.000208536	0.00111339
70.205	0.758953	0.767056	0.774383											69.744	0.000757712	0.000219474	0.00112192
70.325	0.75898	0.767122	0.774461											69.835	0.000758819	0.000233875	0.00113599
70.446	0.759011	0.76723	0.774554											69.986	0.000760439	0.000248221	0.00115169
70.506	0.759021	0.767274	0.77463											70.046	0.000760858	0.000255309	0.00117256
70.571	0.759034	0.767388	0.77474											70.2	0.000762758	0.000262945	0.00119586
70.691	0.759064	0.767454	0.774812											70.287	0.000764108	0.00027708	0.00121087
70.778	0.759092	0.767524	0.774941											70.378	0.000764614	0.000286862	0.00123193
70.929	0.759131	0.767597	0.774981											70.472	0.000765907	0.000303552	0.00124707
71.049	0.759165	0.76769	0.775105											70.589	0.000768052	0.000317043	0.00127049
71.14	0.759194	0.767761	0.77527											70.679	0.000769668	0.000327234	0.00129923
71.2	0.759217	0.767836	0.775394											70.77	0.000771442	0.000333599	0.00132024
71.291	0.759249	0.767911	0.77562											70.86	0.000773011	0.000342503	0.00135368
71.411	0.759291	0.767988	0.775766											70.951	0.000775229	0.000354419	0.00137412
71.562	0.759344	0.768064	0.77592											71.041	0.0007781	0.00036801	0.00139074
71.653	0.759376	0.768145	0.776088											71.136	0.000780912	0.000376246	0.0014143
71.773	0.759425	0.76822	0.77625											71.222	0.000783726	0.000387138	0.0014338
71.864	0.759462	0.768327	0.776467											71.347	0.000788845	0.000394622	0.00146243
71.955	0.759498	0.768433	0.776579											71.468	0.000793104	0.000401791	0.00147378
72.075	0.759548	0.768539	0.776687											71.588	0.000799579	0.00041144	0.00148459
72.136	0.759573	0.768645	0.776976											71.709	0.000805273	0.000415458	0.00151333
72.226	0.759612	0.768722	0.777215											71.796	0.00081012	0.000420887	0.00152387
72.317	0.759653	0.768773	0.77739											71.856	0.000813267	0.000426554	0.00152686
72.437	0.759707	0.768876	0.777574											71.977	0.000820671	0.000433446	0.0015387
72.562	0.759762	0.768953	0.777756											72.067	0.000826998	0.000439936	0.00153873
72.679	0.759815	0.76903	0.777934											72.158	0.000833887	0.000445243	0.00154727
72.8	0.75987	0.76913	0.778163											72.278	0.000841553	0.000450852	0.00154756
72.894	0.759912	0.769182	0.778382											72.339	0.000846716	0.000454134	0.00154486
72.984	0.759953	0.769257	0.778594											72.433	0.000853903	0.000457593	0.00153543
73.041	0.759979	0.769352	0.778748											72.55	0.00086318	0.000458025	0.00152949
73.135	0.760022	0.769449	0.778883											72.671	0.000872556	0.000460854	0.00152299
73.222	0.760062	0.769522	0.779013											72.761	0.00087994	0.000462628	0.00151233
73.343	0.760116	0.769618	0.779141											72.882	0.000889978	0.000464592	0.00150225
73.494	0.760184	0.769693	0.779275											72.973	0.000897076	0.000466483	0.0014904
73.615	0.760238	0.769764	0.779423											73.063	0.000904434	0.000466262	0.00147372
73.675	0.760265	0.769841	0.779538											73.154	0.000911637	0.000466246	0.00145788
73.826	0.760332	0.769916	0.779676											73.244	0.000918538	0.000465964	0.00144287
73.887	0.760358	0.770016	0.779776											73.365	0.000927631	0.000465527	0.001427
74.007	0.760411	0.77012	0.779887											73.486	0.000936381	0.000464878	0.00141448
74.098	0.760452	0.770201	0.77995											73.576	0.000942853	0.000463856	0.00140779
74.158	0.760478	0.770324	0.780081											73.701	0.000950505	0.000463064	0.00138634
74.249	0.760518	0.770381	0.78022											73.761	0.000954175	0.000461351	0.00136522
74.37	0.760572	0.770461	0.780328											73.848	0.000958642	0.000458977	0.00134825
74.494	0.760627	0.770549	0.780505											73.939	0.000962915	0.00045681	0.00132832
74.642	0.760692	0.770697	0.780612											74.09	0.000970888	0.000453768	0.00131549
74.732	0.760732	0.77079	0.780701											74.181	0.000974927	0.00045195	0.00130675
74.823	0.760773	0.770911	0.780853											74.301	0.000978524	0.00044939	0.00129128
74.913	0.760813	0.771037	0.780974											74.422	0.00098423	0.000447118	0.0012809
75.004	0.760852	0.771098	0.781095											74.483	0.000986219	0.000444781	0.00127063
75.068	0.76088	0.771226	0.781206											74.607	0.000989079	0.000443167	0.00126293
75.159	0.760919	0.771318	0.781334											74.694	0.000991555	0.000440707	0.00125461
75.31	0.760985	0.77138	0.781499											74.754	0.000990637	0.000436745	0.00124483
75.397	0.761024	0.771512	0.781652											74.879	0.000992597	0.000434517	0.00123963
75.517	0.761074	0.771574	0.781769											74.939	0.000991725	0.000431434	0.00123689
75.608	0.761111	0.771733	0.781909											75.09	0.000992428	0.000429123	0.00123607
75.729	0.761161	0.771889	0.781981											75.241	0.000989422	0.000426175	0.00123577
75.79	0.761186	0.771916	0.782126											75.268	0.000989901	0.000424457	0.00123784
75.88	0.761223	0.772048	0.782238											75.392	0.000985965	0.000422356	0.00124102
75.974	0.761262	0.772142	0.782393											75.483	0.000983223	0.000420211	0.00124651
76.126	0.761327	0.772264	0.782505											75.604	0.000978389	0.000417209	0.00125223
76.243	0.761375	0.772352	0.782628											75.691	0.000975316	0.00041506	0.0012582
76.333	0.761413	0.772447	0.78274											75.785	0.000969364	0.000413851	0.00126491
76.424	0.761451	0.772537	0.782858											75.876	0.000964724	0.000412507	0.00127084
76.488	0.761477	0.772626	0.783011											75.967	0.000957883	0.000411005	0.00127919
76.605	0.761527	0.772713	0.783176											76.057	0.000951211	0.000409594	0.00128727
76.726	0.761578	0.772832	0.783256											76.178	0.000941964	0.000408583	0.00129076
76.847	0.76163	0.772945	0.783443											76.299	0.000930389	0.000408289	0.00129794
76.942	0.761672	0.773026	0.783518											76.39	0.000922192	0.000408499	0.00130005
77.032	0.761711	0.773107	0.783665											76.48	0.000913499	0.000408197	0.00130287
77.119	0.76175	0.773159	0.783808											76.541	0.000905771	0.000408424	0.00130317
77.24	0.761804	0.773292	0.783921											76.692	0.000889228	0.000409821	0.00130227
77.361	0.761858	0.773367	0.784034											76.782	0.000877901	0.000410622	0.00130049
77.452	0.761899	0.773466	0.784103											76.899	0.00086333	0.000412397	0.00129787
77.543	0.76194	0.773566	0.784206											77.024	0.000846638	0.000413842	0.00129322
77.663	0.761994	0.773587	0.7844											77.051	0.000843498	0.000415946	0.00128658
77.697	0.76201	0.773659	0.784512											77.141	0.000831547	0.000416271	0.00127999
77.849	0.76208	0.773787	0.784675											77.296	0.000811	0.000421158	0.00127113
77.939	0.762122	0.77388	0.784793											77.417	0.000793902	0.000424146	0.00126442
78.026	0.762161	0.773899	0.784921											77.444	0.000789709	0.000427275	0.00125688
78.117	0.762203	0.774041	0.785041											77.625	0.000763714	0.000431426	0.00124971
78.238	0.762257	0.774088	0.785207											77.689	0.000754372	0.000437008	0.00123922
78.389	0.762326	0.774179	0.78529											77.81	0.000736626	0.000443442	0.00123533
78.484	0.762368	0.774244	0.785452											77.897	0.000724331	0.000449782	0.0012277
78.574	0.762407	0.774316	0.785582											77.992	0.000710601	0.000455124	0.0012206
78.695	0.762462	0.774378	0.785751											78.079	0.000698346	0.0004628	0.00121136
78.782	0.762502	0.774437	0.785882											78.173	0.000685186	0.000468629	0.001201
78.877	0.762545	0.774527	0.786001											78.294	0.000668605	0.000476006	0.00119588
78.968	0.762589	0.774623	0.786178											78.445	0.000648889	0.000482278	0.00118563
79.054	0.762628	0.774663	0.786256											78.506	0.000640716	0.000489133	0.00117888
79.145	0.762672	0.77472	0.786458											78.596	0.000629371	0.000495846	0.00116674
79.266	0.76273	0.774798	0.786572											78.714	0.000615301	0.000506469	0.00115742
79.387	0.762787	0.774867	0.786762											78.838	0.000601846	0.000517861	0.00113987
79.478	0.762832	0.774908	0.786828											78.899	0.00059443	0.000527231	0.0011336
79.569	0.762878	0.774979	0.786933											79.016	0.000583335	0.000536687	0.00112281
79.659	0.762922	0.775028	0.787062											79.107	0.000574851	0.000546141	0.0011074
79.72	0.762955	0.775079	0.787131											79.201	0.000565735	0.000552383	0.00109973
79.901	0.763053	0.77511	0.787251											79.262	0.000563336	0.000573453	0.0010834
79.992	0.763105	0.775172	0.787343											79.379	0.000552429	0.000584027	0.00107117
80.057	0.763144	0.775224	0.78743											79.47	0.000546644	0.000592856	0.00105754
80.208	0.763235	0.7753	0.787513											79.625	0.000541606	0.000613087	0.00105142
80.299	0.763286	0.775349	0.787592											79.712	0.000534749	0.000625779	0.00103945
80.39	0.763342	0.77541	0.787701											79.833	0.00053331	0.000639043	0.00102693
80.51	0.76341	0.775456	0.787803											79.927	0.000530548	0.000657309	0.00101651
80.601	0.763469	0.775502	0.787903											80.018	0.000528273	0.000672575	0.00101265
80.688	0.76353	0.775547	0.787954											80.109	0.000532803	0.000685967	0.00101085
80.779	0.763595	0.775592	0.788054											80.2	0.000534638	0.000702803	0.0010017
80.904	0.763678	0.775637	0.788131											80.29	0.000535404	0.00072396	0.000998765
80.995	0.763747	0.775698	0.788206											80.411	0.000542653	0.000740471	0.00100602
81.116	0.763839	0.775744	0.788311											80.502	0.000548418	0.000762231	0.00101386
81.176	0.763882	0.775808	0.788392											80.623	0.00055354	0.000774764	0.00102244
81.297	0.763976	0.775856	0.788478											80.714	0.000563635	0.000798744	0.00102971
81.384	0.764041	0.775885	0.788558											80.775	0.000572102	0.000814907	0.00104697
81.539	0.764173	0.775949	0.788637											80.892	0.000583951	0.000848619	0.00106598
81.63	0.764246	0.776018	0.788717											81.017	0.000600278	0.00086953	0.00108713
81.751	0.764366	0.776068	0.788822											81.104	0.000613319	0.000896275	0.00111078
81.842	0.76445	0.776126	0.788954											81.195	0.000628523	0.000916743	0.00114936
81.963	0.764567	0.776201	0.789013											81.319	0.000650262	0.000946003	0.00116259
82.024	0.764613	0.776284	0.789135											81.44	0.000672354	0.000962823	0.00119937
82.115	0.764704	0.776343	0.78923											81.531	0.000693133	0.000985916	0.00123316
82.206	0.764805	0.776406	0.789291											81.618	0.000712923	0.00100934	0.00125425
82.327	0.764933	0.776506	0.789467											81.743	0.000742139	0.00104118	0.00130647
82.418	0.765032	0.776576	0.789581											81.834	0.000763256	0.00106491	0.00133863
82.535	0.76516	0.776637	0.789704											81.921	0.00078694	0.00109637	0.00137827
82.63	0.765264	0.776688	0.789819											81.985	0.00080579	0.00112363	0.00142114
82.751	0.765406	0.776824	0.789935											82.137	0.000846551	0.00115813	0.0014631
82.841	0.765518	0.77689	0.790152											82.227	0.000872308	0.00118475	0.00153995
82.932	0.76563	0.777002	0.790282											82.349	0.000909687	0.00121075	0.00158368
82.993	0.765716	0.777058	0.790421											82.409	0.000926764	0.00122823	0.0016313
83.14	0.765894	0.777134	0.790499											82.5	0.000954753	0.00127306	0.00166284
83.235	0.766033	0.777248	0.790774											82.621	0.000991738	0.00130118	0.00176723
83.322	0.766153	0.777333	0.790926											82.708	0.0010198	0.00132756	0.00182375
83.413	0.76628	0.777497	0.791074											82.863	0.00107128	0.00135535	0.00187464
83.534	0.766443	0.777549	0.791186											82.924	0.00109153	0.00139246	0.00190851
83.689	0.766688	0.777638	0.791393											83.015	0.00112252	0.00144011	0.00197956
83.78	0.766812	0.777744	0.791698											83.102	0.00115205	0.00146805	0.00207553
83.898	0.767001	0.777885	0.791817											83.227	0.0011943	0.00150413	0.00211201
84.023	0.767184	0.777993	0.791946											83.318	0.00122601	0.00154217	0.00214895
84.08	0.767289	0.778171	0.792222											83.465	0.00127701	0.00155937	0.00222068
84.14	0.767372	0.778249	0.792504											83.526	0.00129827	0.00157753	0.00229285
84.295	0.767623	0.778376	0.792725											83.621	0.00133162	0.00162404	0.00234548
84.387	0.767778	0.778493	0.792874											83.708	0.00136207	0.00165039	0.00237764
84.477	0.76794	0.778665	0.793187											83.833	0.0014056	0.00167627	0.00244738
84.568	0.768086	0.7788	0.793501											83.924	0.00143722	0.00170208	0.00250947
84.689	0.768296	0.77897	0.793831											84.041	0.00147811	0.00173556	0.00256894
84.78	0.768453	0.779054	0.794088											84.101	0.00149878	0.00176004	0.00261696
84.841	0.768564	0.779237	0.794343											84.226	0.00154152	0.00177717	0.0026651
84.962	0.768779	0.779386	0.794612											84.317	0.00157219	0.00180828	0.00270578
85.083	0.769003	0.779572	0.79487											84.438	0.00161322	0.00183561	0.00274645
85.204	0.769223	0.779728	0.795228											84.529	0.00164292	0.00186375	0.00279983
85.295	0.769385	0.779931	0.795488											84.651	0.0016809	0.0018841	0.00283474
85.387	0.769555	0.780035	0.795752											84.711	0.00169969	0.00190398	0.00287437
85.477	0.769723	0.780248	0.796025											84.833	0.00173702	0.00192246	0.00290973
85.538	0.769838	0.780408	0.796288											84.923	0.00176374	0.00193732	0.00294136
85.659	0.770072	0.780629	0.796673											85.045	0.00179782	0.00195848	0.00298601
85.777	0.770291	0.780797	0.796972											85.136	0.00182562	0.00197882	0.003017
85.902	0.77053	0.780967	0.797267											85.226	0.0018487	0.00199781	0.0030462
85.993	0.770709	0.781198	0.797564											85.348	0.00188187	0.0020107	0.00307697
86.114	0.77094	0.781315	0.797948											85.408	0.00189449	0.00202412	0.00310692
86.205	0.771118	0.781551	0.798261											85.529	0.00192503	0.00203433	0.00313196
86.326	0.771359	0.781725	0.798667											85.617	0.00194533	0.00204816	0.00316432
86.387	0.771478	0.781907	0.79897											85.708	0.0019656	0.00205151	0.00318417
86.478	0.771662	0.782149	0.799475											85.829	0.00199263	0.00205868	0.00321134
86.599	0.7719	0.782404	0.799573											85.954	0.00201614	0.00206597	0.00321648
86.72	0.772144	0.782644	0.799867											86.071	0.00203632	0.00207375	0.00323106
86.811	0.772326	0.782842	0.800383											86.166	0.00205221	0.00207659	0.00325397
86.933	0.772572	0.783032	0.800581											86.257	0.00206871	0.00208044	0.00326193
87.054	0.772817	0.783285	0.800981											86.378	0.00208517	0.00208027	0.00327569
87.114	0.772939	0.783415	0.801469											86.439	0.0020951	0.00207752	0.00328955
87.236	0.773186	0.783671	0.80157											86.56	0.00211057	0.00207244	0.00329288
87.296	0.773309	0.783801	0.802061											86.621	0.0021176	0.00207398	0.00330406
87.418	0.773559	0.784058	0.802264											86.742	0.00213076	0.00206613	0.0033077
87.509	0.773742	0.784321	0.802564											86.863	0.00214224	0.00206023	0.00331245
87.63	0.773987	0.784585	0.802863											86.985	0.00215015	0.00205065	0.00331682
87.717	0.774163	0.784783	0.803261											87.076	0.0021576	0.00204315	0.00332013
87.812	0.774355	0.784913	0.803572											87.136	0.00216104	0.00203326	0.00332136
87.933	0.7746	0.785178	0.803857											87.258	0.00216688	0.00201927	0.00331845
88.024	0.774782	0.785376	0.804355											87.349	0.00216996	0.00200649	0.00331552
88.146	0.775021	0.785573	0.804654											87.439	0.00217351	0.00198982	0.00331112
88.267	0.77526	0.785774	0.804953											87.531	0.00217298	0.00197303	0.0033072
88.358	0.775439	0.78597	0.805267											87.621	0.00217136	0.0019586	0.00329682
88.449	0.775622	0.786237	0.805666											87.743	0.00217155	0.00194452	0.00328325
88.54	0.7758	0.786502	0.805977											87.864	0.00216821	0.00192703	0.00327134
88.627	0.775966	0.786701	0.806291											87.955	0.00216438	0.0019115	0.00325643
88.756	0.776215	0.786968	0.806608											88.076	0.00215773	0.00188821	0.00324025
88.844	0.776382	0.787099	0.807032											88.137	0.00215343	0.0018723	0.00321541
88.935	0.776549	0.787366	0.807349											88.259	0.00214392	0.0018549	0.00319054
89.025	0.776722	0.787563	0.807563											88.35	0.00213702	0.00183739	0.00317558
89.177	0.776999	0.787826	0.808098											88.471	0.00212126	0.00180751	0.00313901
89.268	0.777144	0.788023	0.808417											88.562	0.0021121	0.00178917	0.00311266
89.359	0.777284	0.78822	0.808737											88.653	0.00210014	0.00177094	0.00308475
89.45	0.777421	0.788413	0.80905											88.744	0.00208775	0.0017527	0.00305558
89.538	0.777551	0.788606	0.809446											88.835	0.00207433	0.00173522	0.00301876
89.663	0.77773	0.788862	0.809752											88.956	0.00205661	0.00171015	0.00298402
89.784	0.777901	0.789049	0.810038											89.047	0.00204122	0.00168627	0.00295196
89.875	0.778027	0.789305	0.810494											89.169	0.00201944	0.00166848	0.00289848
89.936	0.778111	0.789493	0.810764											89.26	0.0020011	0.00165607	0.00286521
90.058	0.778277	0.789674	0.81102											89.351	0.00198348	0.00163269	0.0028343
90.179	0.77844	0.789917	0.811271											89.472	0.00195918	0.00161075	0.00280276
90.3	0.778602	0.790097	0.811517											89.563	0.0019403	0.00158792	0.00277102
90.422	0.778764	0.790286	0.811843											89.658	0.00192037	0.00156625	0.00272864
90.482	0.778843	0.790385	0.81208											89.715	0.0019074	0.00155743	0.00269854
90.604	0.779004	0.790678	0.812312											89.867	0.0018757	0.00153611	0.00266767
90.665	0.779083	0.790852	0.812475											89.958	0.0018549	0.00152604	0.00264875
90.756	0.779202	0.791013	0.812762											90.049	0.00183462	0.00151159	0.00260597
90.877	0.77936	0.791177	0.812982											90.14	0.00181423	0.00149289	0.00257451
90.968	0.779479	0.791393	0.813353											90.261	0.00178704	0.00147929	0.00252156
91.09	0.779635	0.791551	0.813652											90.352	0.00176642	0.00146206	0.00247467
91.211	0.779791	0.791704	0.81381											90.443	0.00174603	0.00144576	0.00244964
91.302	0.779908	0.791887	0.814025											90.565	0.00171874	0.001434	0.00241314
91.393	0.780021	0.792053	0.814309											90.686	0.00169244	0.00142285	0.00236225
91.454	0.780102	0.792136	0.814576											90.747	0.00167871	0.00141483	0.00230683
91.606	0.780294	0.792299	0.814701											90.869	0.00165154	0.00139799	0.00227776
91.697	0.780408	0.792379	0.814939											90.929	0.00163991	0.00138999	0.00221768
91.819	0.780564	0.792579	0.815109											91.081	0.00160637	0.00137718	0.0021702
91.879	0.780638	0.792698	0.81533											91.172	0.00158828	0.00137148	0.00210419
92.001	0.78079	0.792818	0.815546											91.263	0.00156893	0.00136069	0.00203326
92.092	0.780908	0.792937	0.815661											91.354	0.001552	0.00135357	0.00199771
92.183	0.781021	0.793135	0.815834											91.506	0.00152281	0.00134791	0.00194677
92.304	0.78117	0.793215	0.816076											91.567	0.00151061	0.00134059	0.00187424
92.457	0.781361	0.793377	0.816269											91.692	0.00148935	0.00133149	0.00181846
92.487	0.781395	0.793451	0.81647											91.749	0.00147951	0.00132972	0.00176087
92.605	0.781538	0.793611	0.816684											91.871	0.00145908	0.00132277	0.00169895
92.699	0.781655	0.793728	0.816905											91.962	0.00144363	0.00131727	0.00164173
92.821	0.781809	0.793847	0.817201											92.053	0.00143112	0.00131016	0.00156839
92.912	0.781919	0.794002	0.817352											92.174	0.0014171	0.00130489	0.00152127
93.034	0.78206	0.794158	0.817705											92.296	0.00140514	0.00129783	0.00140354
93.125	0.782175	0.794276	0.817902											92.387	0.00139644	0.00129268	0.0013347
93.216	0.782286	0.794431	0.818096											92.509	0.0013849	0.00128746	0.0012668
93.307	0.782396	0.794553	0.818281											92.603	0.00137608	0.0012823	0.00117668
93.429	0.782535	0.794663	0.818387											92.691	0.00136787	0.00127548	0.00110973
93.55	0.782687	0.794779	0.818518											92.782	0.00135944	0.00126881	0.00101793
93.641	0.782801	0.794894	0.818611											92.873	0.00135106	0.0012637	0.0009537
93.733	0.782904	0.795055	0.818644											92.999	0.00133956	0.00125868	0.000886405
93.824	0.783007	0.795163	0.818705											93.089	0.0013314	0.00125369	0.000817891
93.915	0.783119	0.795277	0.818676											93.177	0.00132355	0.00124871	0.000749863
94.006	0.783219	0.795388	0.818639											93.268	0.00131551	0.00124384	0.000658544
94.128	0.783366	0.795501	0.818616											93.359	0.0013075	0.00123734	0.000588211
94.249	0.783508	0.795653	0.818592											93.481	0.00129686	0.00123081	0.000495191
94.34	0.78362	0.795768	0.818577											93.572	0.00128911	0.00122614	0.000448004
94.432	0.78372	0.795952	0.818552											93.724	0.0012762	0.00122128	0.0003542
94.553	0.783857	0.796036	0.818535											93.789	0.00127074	0.00121517	0.000282262
94.614	0.783931	0.796142	0.818508											93.88	0.00126319	0.00121201	0.000186149
94.766	0.784105	0.796295	0.81849											94.001	0.00125333	0.00120418	0.000114276
94.857	0.784205	0.796394	0.81846											94.092	0.00124597	0.00119965	1.54311e-05
94.952	0.784306	0.796476	0.818427											94.149	0.00124137	0.00119483	-5.84109e-05
95.04	0.784413	0.796615	0.818388											94.271	0.00123167	0.00119049	-0.000131609
		0.796751	0.818344											94.393	0.00122225		-0.000207736
		0.796852	0.81829											94.484	0.00121523		-0.000305478
		0.79697	0.818226											94.579	0.00120785		-0.000379146
		0.797112	0.818191											94.696	0.00119884		-0.000456955
		0.797213	0.818116											94.788	0.00119176		-0.000555914
		0.797315	0.818054											94.879	0.00118544		-0.000658554
		0.797429	0.818017											94.974	0.00117809		-0.000729775
		0.797557	0.817919											95.096	0.00116959		-0.000807411
																	Ti [°C]
																	87.0872

## Sheet: Peptide3
NCS-1/Ric-8A-P2	REPEAT 1	REPEAT 2	REPEAT 3
Temperature [°C]	Ratio 350 nm / 330 nm	Ratio 350 nm / 330 nm	Ratio 350 nm / 330 nm
35.211	0.739249	0.737289	0.734635
35.3	0.739282	0.737363	0.734711
35.449	0.739345	0.737462	0.734779
35.569	0.739387	0.737513	0.734878
35.692	0.739439	0.737591	0.734939
35.837	0.739497	0.73763	0.735006
35.957	0.739548	0.737678	0.735055
36.046	0.73958	0.737744	0.735122
36.136	0.73962	0.737814	0.735186
36.255	0.739669	0.737864	0.735235
36.318	0.739692	0.737898	0.735283
36.434	0.739741	0.737965	0.735349
36.557	0.73979	0.738016	0.735412
36.643	0.739827	0.738084	0.735462
36.732	0.739863	0.738137	0.735541
36.822	0.739902	0.738204	0.735591
36.971	0.739963	0.738254	0.73564
37.001	0.739977	0.738323	0.735704
37.12	0.740027	0.738374	0.735752
37.214	0.740064	0.738424	0.7358
37.303	0.7401	0.738458	0.735863
37.419	0.740148	0.738542	0.735931
37.538	0.740197	0.73861	0.735996
37.628	0.740238	0.738643	0.736048
37.717	0.740273	0.738709	0.736122
37.807	0.740314	0.738775	0.736179
37.896	0.740349	0.738824	0.73625
37.986	0.740388	0.738872	0.736305
38.105	0.740438	0.73892	0.736377
38.228	0.740489	0.738982	0.736431
38.374	0.740551	0.739013	0.736502
38.437	0.740576	0.739068	0.736572
38.557	0.740627	0.739123	0.736623
38.613	0.740652	0.739177	0.736675
38.702	0.74069	0.7392	0.736725
38.822	0.740741	0.739238	0.736802
38.941	0.74079	0.739275	0.736844
39.005	0.740818	0.739324	0.736878
39.154	0.740881	0.739363	0.73696
39.24	0.740918	0.739403	0.736985
39.333	0.740957	0.739452	0.737036
39.479	0.741019	0.739488	0.737074
39.539	0.741044	0.73954	0.737126
39.632	0.741084	0.739577	0.737165
39.722	0.741122	0.739615	0.737203
39.811	0.74116	0.739638	0.737261
39.927	0.74121	0.739688	0.737324
40.046	0.74126	0.739744	0.737387
40.14	0.741301	0.739779	0.737439
40.259	0.741352	0.739823	0.73749
40.319	0.741378	0.739855	0.737568
40.438	0.741429	0.739887	0.737604
40.524	0.741466	0.739919	0.737683
40.644	0.741518	0.739957	0.737742
40.763	0.74157	0.739986	0.73782
40.853	0.74161	0.740005	0.737895
40.943	0.74165	0.740041	0.737932
41.032	0.74169	0.740088	0.738027
41.122	0.741731	0.740116	0.738083
41.275	0.741802	0.740151	0.738136
41.361	0.741845	0.740168	0.73819
41.451	0.74189	0.740204	0.738257
41.57	0.74195	0.740233	0.738323
41.664	0.741998	0.74026	0.738372
41.779	0.742057	0.740288	0.738407
41.839	0.742088	0.74032	0.738471
41.962	0.742151	0.740351	0.738534
42.082	0.742213	0.740406	0.738581
42.168	0.742257	0.74044	0.738646
42.232	0.74229	0.740487	0.738714
42.351	0.742352	0.740536	0.738765
42.437	0.742396	0.740573	0.738819
42.59	0.742474	0.740599	0.73887
42.68	0.742521	0.740637	0.738943
42.799	0.742581	0.740677	0.738995
42.889	0.742627	0.740744	0.739059
42.915	0.742639	0.740786	0.739111
43.069	0.742716	0.74084	0.739168
43.184	0.742774	0.740883	0.739216
43.274	0.742819	0.740927	0.739259
43.398	0.742879	0.740984	0.739322
43.483	0.742921	0.741014	0.739358
43.547	0.742951	0.741075	0.739391
43.663	0.743006	0.741105	0.739421
43.753	0.743048	0.741168	0.739447
43.872	0.743103	0.741234	0.739479
43.992	0.74316	0.741282	0.739502
44.082	0.7432	0.741331	0.739525
44.235	0.743268	0.741396	0.73955
44.325	0.743308	0.741465	0.739585
44.411	0.743348	0.741514	0.739615
44.5	0.743385	0.741565	0.739655
44.56	0.743408	0.74162	0.739691
44.684	0.743461	0.741694	0.739729
44.773	0.743498	0.741728	0.739781
44.893	0.743547	0.741784	0.739837
45.043	0.743608	0.741877	0.739865
45.132	0.743642	0.741917	0.739923
45.192	0.743669	0.741992	0.739981
45.312	0.743716	0.742071	0.740008
45.402	0.743751	0.742148	0.740067
45.491	0.743785	0.742207	0.740125
45.607	0.74383	0.742268	0.740169
45.697	0.743865	0.742343	0.740212
45.787	0.743898	0.742379	0.740257
45.91	0.743942	0.742435	0.740317
46.03	0.743987	0.742511	0.740359
46.12	0.74402	0.742584	0.740417
46.24	0.744063	0.74264	0.740448
46.329	0.744096	0.742695	0.740505
46.389	0.744115	0.742766	0.74055
46.509	0.744159	0.742818	0.740614
46.599	0.74419	0.742851	0.740664
46.685	0.744219	0.742922	0.740717
46.838	0.744271	0.742989	0.740794
46.988	0.744319	0.743059	0.74085
47.078	0.744347	0.743108	0.740909
47.168	0.744376	0.743159	0.74099
47.224	0.744394	0.743207	0.74105
47.317	0.744425	0.743256	0.741129
47.437	0.744461	0.743319	0.741187
47.527	0.744489	0.743382	0.741243
47.647	0.744527	0.743398	0.741296
47.736	0.744554	0.743472	0.741372
47.826	0.744579	0.74353	0.741442
47.946	0.744615	0.743574	0.741475
48.036	0.744642	0.743614	0.741525
48.066	0.74465	0.743657	0.741594
48.182	0.744683	0.743698	0.741626
48.336	0.744727	0.743737	0.741691
48.422	0.744751	0.743805	0.741755
48.541	0.744785	0.743858	0.741818
48.665	0.744819	0.743897	0.741864
48.725	0.744836	0.743936	0.741909
48.845	0.744869	0.743975	0.741967
48.934	0.744894	0.744016	0.742013
49.054	0.744928	0.744071	0.742042
49.174	0.744962	0.744111	0.7421
49.26	0.744985	0.744151	0.742139
49.35	0.745012	0.744179	0.742195
49.444	0.745039	0.744233	0.742236
49.53	0.745063	0.744274	0.742274
49.654	0.745099	0.744343	0.74232
49.77	0.745133	0.744385	0.742341
49.893	0.74517	0.744421	0.742388
50.013	0.745205	0.744471	0.74243
50.073	0.745223	0.744509	0.742461
50.193	0.745261	0.744552	0.7425
50.253	0.74528	0.744576	0.742519
50.343	0.745308	0.744608	0.742546
50.463	0.745344	0.744657	0.742585
50.583	0.745382	0.744699	0.742612
50.703	0.745423	0.74471	0.742649
50.789	0.745449	0.744732	0.742677
50.882	0.745479	0.744764	0.742706
51.002	0.745518	0.744796	0.742745
51.062	0.745537	0.744826	0.742776
51.182	0.745576	0.744846	0.742813
51.272	0.745606	0.744859	0.742844
51.392	0.745644	0.744881	0.742876
51.482	0.745675	0.744904	0.742916
51.572	0.745704	0.744935	0.742947
51.662	0.745733	0.744973	0.742967
51.752	0.745763	0.744988	0.743018
51.868	0.745802	0.745011	0.743049
52.022	0.745854	0.745034	0.743077
52.112	0.745884	0.745064	0.743108
52.228	0.745924	0.745102	0.743139
52.351	0.745966	0.745123	0.743183
52.411	0.745986	0.745144	0.743235
52.502	0.746018	0.745165	0.743258
52.561	0.746038	0.745186	0.743294
52.681	0.74608	0.745207	0.743351
52.771	0.746111	0.74522	0.743394
52.921	0.746162	0.745248	0.743438
53.041	0.746203	0.745285	0.743494
53.101	0.746224	0.745304	0.743535
53.221	0.746265	0.74533	0.743573
53.341	0.746306	0.745355	0.743611
53.401	0.746326	0.745379	0.743642
53.551	0.746378	0.745407	0.743692
53.641	0.746408	0.74543	0.743723
53.728	0.746438	0.745445	0.743742
53.818	0.746468	0.745487	0.743782
53.941	0.746508	0.745531	0.743813
54.001	0.74653	0.745571	0.743853
54.091	0.746559	0.745604	0.743886
54.211	0.746596	0.745637	0.743919
54.302	0.746625	0.745683	0.743967
54.451	0.746674	0.745717	0.744002
54.541	0.746702	0.745752	0.74404
54.658	0.746739	0.745786	0.744091
54.751	0.746769	0.745831	0.744131
54.842	0.746796	0.745877	0.744159
54.932	0.746824	0.74591	0.744211
54.992	0.74684	0.745943	0.744265
55.142	0.746887	0.745975	0.744323
55.232	0.746913	0.74602	0.744348
55.352	0.746948	0.746055	0.74439
55.472	0.746982	0.746078	0.744446
55.562	0.747007	0.746136	0.744487
55.652	0.747033	0.746184	0.744544
55.772	0.747067	0.746208	0.744585
55.802	0.747075	0.746245	0.744627
55.918	0.747108	0.746293	0.744655
56.008	0.747132	0.746353	0.744714
56.102	0.747159	0.746389	0.744772
56.253	0.747197	0.746413	0.744816
56.373	0.747229	0.746449	0.744866
56.463	0.747252	0.746493	0.744932
56.553	0.747276	0.746526	0.744967
56.673	0.747305	0.746566	0.745035
56.763	0.747324	0.746597	0.745107
56.853	0.747344	0.746628	0.745162
56.973	0.747371	0.746649	0.745236
57.063	0.747391	0.746709	0.745273
57.153	0.747412	0.746729	0.745328
57.274	0.747436	0.746759	0.745403
57.394	0.74746	0.746795	0.745454
57.484	0.747479	0.746813	0.745519
57.604	0.747501	0.746858	0.745554
57.694	0.747518	0.746894	0.745619
57.754	0.747529	0.746929	0.745663
57.844	0.747545	0.746957	0.745719
57.964	0.747566	0.746985	0.745759
58.115	0.747594	0.747002	0.745815
58.205	0.74761	0.747031	0.745858
58.265	0.74762	0.74708	0.745885
58.385	0.747641	0.74711	0.745944
58.475	0.747656	0.747148	0.746006
58.596	0.747677	0.747178	0.746037
58.686	0.747692	0.747207	0.746099
58.806	0.747713	0.747237	0.746164
58.896	0.747728	0.747265	0.746197
58.986	0.747744	0.747297	0.746264
59.106	0.747765	0.747325	0.746311
59.197	0.747781	0.747357	0.746383
59.287	0.747798	0.747405	0.746401
59.407	0.74782	0.747433	0.746506
59.527	0.747843	0.747471	0.746541
59.647	0.747865	0.747508	0.746598
59.738	0.747883	0.747526	0.746679
59.828	0.747901	0.747564	0.746738
59.922	0.747921	0.74759	0.746794
59.978	0.747932	0.747621	0.746855
60.065	0.747951	0.747649	0.746938
60.188	0.747977	0.747679	0.747004
60.309	0.748005	0.747712	0.747068
60.459	0.74804	0.747755	0.747138
60.549	0.748059	0.747787	0.747228
60.64	0.748081	0.74782	0.747276
60.76	0.74811	0.747877	0.747393
60.82	0.748125	0.747915	0.747444
60.91	0.748149	0.747953	0.747518
61.03	0.748177	0.748003	0.747614
61.151	0.748212	0.74804	0.747715
61.241	0.748233	0.748063	0.747793
61.331	0.748257	0.748099	0.747866
61.452	0.748289	0.748159	0.747942
61.511	0.748306	0.748193	0.748039
61.632	0.748338	0.748239	0.748113
61.752	0.748373	0.748271	0.748182
61.843	0.7484	0.748313	0.748229
61.933	0.748428	0.748336	0.748346
62.023	0.748455	0.748377	0.748416
62.173	0.7485	0.748398	0.748486
62.294	0.748537	0.748437	0.748555
62.384	0.748562	0.748468	0.748676
62.474	0.748588	0.748512	0.748744
62.534	0.748606	0.748552	0.748794
62.621	0.748634	0.748581	0.748867
62.741	0.748673	0.748619	0.748945
62.895	0.748725	0.748637	0.749041
62.986	0.748756	0.748675	0.749091
63.106	0.748797	0.748696	0.749214
63.196	0.748829	0.748736	0.749263
63.196	0.748829	0.748758	0.749358
63.377	0.748893	0.748825	0.749428
63.497	0.748937	0.748859	0.749518
63.558	0.748959	0.748896	0.749605
63.648	0.748995	0.748942	0.749648
63.738	0.749028	0.748978	0.74973
63.858	0.749073	0.749016	0.749793
64.009	0.749134	0.749039	0.749866
64.13	0.749181	0.749106	0.749906
64.22	0.749214	0.749144	0.74998
64.31	0.74925	0.749186	0.750013
64.4	0.749288	0.749246	0.7501
64.491	0.749324	0.74929	0.750151
64.581	0.74936	0.749343	0.750206
64.671	0.749397	0.749373	0.750272
64.792	0.749448	0.749423	0.750308
64.912	0.749497	0.749519	0.750384
65.002	0.749535	0.749625	0.750443
65.123	0.749585	0.749678	0.750521
65.183	0.74961	0.749719	0.750613
65.274	0.749648	0.749802	0.750656
65.394	0.749699	0.749873	0.750754
65.514	0.74975	0.749942	0.750823
65.605	0.749788	0.749981	0.750878
65.725	0.749839	0.750069	0.750973
65.816	0.749877	0.750138	0.751056
65.906	0.749914	0.750232	0.751141
66.026	0.749965	0.750357	0.751253
66.087	0.74999	0.750431	0.751365
66.207	0.750041	0.750508	0.75144
66.268	0.750067	0.750579	0.751532
66.448	0.750141	0.750685	0.751653
66.539	0.750179	0.750764	0.75171
66.659	0.750228	0.750839	0.751834
66.75	0.750265	0.750947	0.751903
66.87	0.750313	0.751002	0.752035
66.93	0.750336	0.751089	0.75214
67.051	0.750382	0.751199	0.752248
67.107	0.750403	0.751347	0.752394
67.201	0.75044	0.751406	0.752512
67.352	0.750497	0.751494	0.75263
67.442	0.75053	0.751613	0.752755
67.537	0.750562	0.751702	0.752914
67.627	0.750594	0.75176	0.753086
67.714	0.750623	0.751878	0.753208
67.834	0.750668	0.752001	0.753333
67.955	0.750708	0.752121	0.753463
68.076	0.750749	0.752218	0.753593
68.166	0.75078	0.752374	0.75375
68.256	0.750811	0.752405	0.753912
68.377	0.750853	0.752469	0.754
68.467	0.750882	0.752596	0.75412
68.561	0.750913	0.752726	0.754271
68.618	0.750931	0.752854	0.754394
68.709	0.75096	0.752985	0.754542
68.829	0.751	0.75308	0.754655
68.95	0.75104	0.753146	0.754806
69.07	0.75108	0.753279	0.754917
69.221	0.751129	0.753404	0.755029
69.311	0.751158	0.753503	0.755142
69.406	0.751188	0.753631	0.755254
69.496	0.751218	0.753699	0.755406
69.556	0.751238	0.753795	0.755521
69.647	0.751267	0.753895	0.755644
69.794	0.751316	0.754029	0.755757
69.884	0.751346	0.754164	0.755915
69.975	0.751377	0.7543	0.756039
70.095	0.751418	0.754396	0.756193
70.19	0.751451	0.754497	0.75631
70.31	0.751494	0.754601	0.756429
70.397	0.751527	0.754701	0.756583
70.487	0.751562	0.754797	0.756735
70.578	0.751598	0.754923	0.756812
70.669	0.751634	0.755041	0.756928
70.759	0.751668	0.755129	0.757115
70.914	0.751732	0.755191	0.757186
71.031	0.751781	0.755304	0.757301
71.125	0.751823	0.755385	0.757404
71.215	0.751863	0.755522	0.757516
71.302	0.751902	0.755599	0.757627
71.393	0.751946	0.755647	0.757807
71.483	0.751988	0.75575	0.757881
71.574	0.752031	0.75582	0.758033
71.725	0.752103	0.755918	0.758142
71.815	0.752148	0.755972	0.758247
71.936	0.752208	0.75607	0.758395
72.056	0.752272	0.756167	0.758468
72.147	0.752315	0.756214	0.75858
72.238	0.752366	0.756317	0.758768
72.298	0.752396	0.756418	0.758883
72.389	0.752444	0.756468	0.759043
72.509	0.752505	0.756544	0.759121
72.66	0.752589	0.756677	0.759274
72.721	0.752624	0.756793	0.759385
72.841	0.752688	0.756875	0.759505
72.962	0.752755	0.756962	0.75962
73.056	0.752812	0.757072	0.759773
73.143	0.752858	0.757151	0.759893
73.264	0.752935	0.757243	0.760046
73.324	0.752968	0.757329	0.760208
73.419	0.753023	0.757417	0.760321
73.536	0.753093	0.757536	0.7604
73.687	0.753184	0.757596	0.760555
73.777	0.753239	0.757681	0.760707
73.898	0.753312	0.75785	0.76087
73.958	0.753348	0.757944	0.76095
74.109	0.753443	0.758052	0.76111
74.17	0.75348	0.758265	0.761192
74.26	0.753536	0.758297	0.761355
74.381	0.753612	0.758408	0.761517
74.442	0.753651	0.758523	0.761635
74.566	0.753729	0.758644	0.761762
74.657	0.753788	0.758759	0.761885
74.747	0.753845	0.758963	0.762007
74.868	0.753922	0.759089	0.762167
74.989	0.753998	0.759214	0.762287
75.08	0.754057	0.759338	0.762449
75.2	0.754133	0.759498	0.762569
75.261	0.754172	0.759629	0.762691
75.348	0.754227	0.759752	0.762813
75.499	0.754323	0.759911	0.762974
75.623	0.754401	0.75999	0.763091
75.684	0.75444	0.760105	0.763209
75.771	0.754494	0.76026	0.763358
75.892	0.754573	0.760442	0.763476
75.982	0.75463	0.760548	0.763552
76.073	0.754687	0.76072	0.763702
76.194	0.754763	0.760787	0.763846
76.285	0.754817	0.760924	0.763959
76.375	0.754876	0.761017	0.764103
76.526	0.754968	0.761113	0.764207
76.647	0.755038	0.761178	0.76431
76.738	0.755093	0.761307	0.764411
76.828	0.755146	0.761399	0.764546
76.889	0.755183	0.761488	0.764678
77.01	0.755256	0.761617	0.764707
77.131	0.755323	0.761709	0.764874
77.252	0.755387	0.761802	0.765
77.342	0.755435	0.761896	0.765098
77.407	0.75547	0.761985	0.765191
77.528	0.755528	0.762097	0.76532
77.618	0.755571	0.762236	0.765447
77.705	0.755613	0.762285	0.765541
77.796	0.755651	0.762336	0.765623
77.947	0.755719	0.762437	0.765716
78.038	0.755761	0.762526	0.765795
78.128	0.755798	0.762592	0.765904
78.219	0.755832	0.762657	0.766002
78.344	0.755873	0.76274	0.766054
78.435	0.755898	0.762782	0.76615
78.522	0.755927	0.762842	0.76622
78.616	0.755953	0.762962	0.766306
78.737	0.755992	0.763008	0.766355
78.854	0.756021	0.763092	0.766443
78.945	0.756046	0.763155	0.766531
79.009	0.756057	0.763221	0.766597
79.157	0.756097	0.763298	0.76669
79.221	0.756109	0.763426	0.766759
79.372	0.756141	0.76348	0.766828
79.463	0.756155	0.763558	0.766897
79.55	0.756172	0.763677	0.766996
79.671	0.756194	0.763768	0.767045
79.792	0.756217	0.763832	0.767147
79.853	0.756227	0.763925	0.767244
79.943	0.756242	0.764047	0.767293
80.038	0.756259	0.764204	0.767413
80.189	0.756286	0.764324	0.767461
80.31	0.756309	0.764414	0.767547
80.367	0.756319	0.764527	0.767603
80.461	0.756339	0.76458	0.767693
80.552	0.756358	0.764688	0.767731
80.673	0.756382	0.76474	0.767784
80.794	0.756412	0.764843	0.76785
80.885	0.756434	0.764912	0.767902
80.976	0.756455	0.764982	0.767943
81.037	0.756474	0.76505	0.767972
81.188	0.756514	0.765118	0.768057
81.305	0.756547	0.7652	0.768094
81.366	0.756566	0.765265	0.768166
81.49	0.756612	0.765372	0.768244
81.608	0.756648	0.765432	0.768305
81.729	0.756692	0.765467	0.768374
81.789	0.756719	0.76556	0.768446
81.911	0.75677	0.765645	0.768518
82.001	0.756802	0.765705	0.76862
82.066	0.756838	0.765752	0.768722
82.183	0.756886	0.765816	0.768803
82.308	0.756942	0.765896	0.768882
82.429	0.757009	0.765985	0.768961
82.489	0.757033	0.766069	0.76906
82.58	0.757089	0.766155	0.769139
82.732	0.757158	0.766155	0.769233
82.853	0.757233	0.766293	0.76931
82.94	0.757283	0.766352	0.76941
83.031	0.757345	0.766408	0.769516
83.122	0.757394	0.766465	0.769591
83.247	0.757475	0.766535	0.769683
83.334	0.757523	0.766591	0.769779
83.428	0.757589	0.766663	0.769867
83.519	0.757658	0.766718	0.769973
83.61	0.757731	0.7668	0.770148
83.731	0.757807	0.766868	0.770264
83.822	0.757875	0.766947	0.770374
83.943	0.757974	0.767019	0.77054
84.034	0.758032	0.767096	0.77062
84.125	0.758104	0.767173	0.770786
84.216	0.758178	0.767283	0.77087
84.307	0.75826	0.767367	0.771039
84.428	0.758355	0.767477	0.771211
84.519	0.758441	0.767538	0.771381
84.64	0.758546	0.767622	0.77151
84.758	0.75866	0.767743	0.771638
84.852	0.758742	0.767861	0.771808
84.943	0.758825	0.767949	0.771936
85.061	0.758945	0.768039	0.772061
85.155	0.759046	0.768158	0.772229
85.247	0.759135	0.768246	0.772354
85.337	0.75923	0.76834	0.77248
85.428	0.759332	0.76843	0.772648
85.549	0.759457	0.768557	0.772818
85.671	0.75959	0.768657	0.772903
85.788	0.759722	0.768752	0.773076
85.879	0.759825	0.768849	0.773254
85.974	0.759938	0.768991	0.773432
86.065	0.760047	0.769126	0.773521
86.156	0.760155	0.769203	0.773699
86.216	0.76023	0.769345	0.773833
86.368	0.760418	0.769456	0.774009
86.489	0.760569	0.769568	0.774141
86.611	0.760727	0.769684	0.774262
86.702	0.760844	0.769832	0.774437
86.762	0.760922	0.769973	0.774565
86.853	0.761041	0.77008	0.774684
87.005	0.761243	0.77022	0.774844
87.096	0.761365	0.770323	0.774966
87.187	0.761488	0.770427	0.77508
87.308	0.761652	0.770526	0.775239
87.399	0.761776	0.77065	0.77535
87.46	0.761859	0.770744	0.775463
87.577	0.762019	0.770836	0.775613
87.702	0.762189	0.770963	0.775718
87.793	0.762312	0.77106	0.775822
87.915	0.762477	0.771117	0.775955
88.005	0.7626	0.771251	0.776052
88.097	0.762723	0.771384	0.776181
88.218	0.76288	0.771484	0.776271
88.309	0.763002	0.77159	0.776353
88.37	0.763081	0.771733	0.77647
88.491	0.763237	0.77187	0.776576
88.582	0.763352	0.771941	0.776654
88.73	0.763535	0.772048	0.776723
88.825	0.763657	0.772155	0.776823
88.916	0.763767	0.772327	0.776896
89.037	0.763898	0.772392	0.776971
89.128	0.763988	0.772567	0.777073
89.219	0.764073	0.772618	0.777175
89.341	0.764183	0.772699	0.777229
89.371	0.764209	0.772808	0.777328
89.523	0.764339	0.772888	0.777409
89.64	0.764435	0.772959	0.777487
89.766	0.764538	0.773042	0.777587
89.826	0.764586	0.773107	0.777688
89.917	0.764658	0.773169	0.777762
90.039	0.764754	0.773217	0.777857
90.13	0.764825	0.773272	0.777926
90.221	0.764896	0.77331	0.777991
90.312	0.764966	0.773339	0.778076
90.433	0.76506	0.77336	0.77813
90.524	0.76513	0.773387	0.778208
90.646	0.765222	0.773401	0.778252
90.737	0.765291	0.773416	0.778306
90.828	0.765361	0.773415	0.778339
90.946	0.765452	0.773416	0.778398
91.04	0.765522	0.773405	0.77844
91.132	0.765592	0.773395	0.778463
91.253	0.765682	0.77337	0.778498
91.374	0.765773	0.773344	0.778542
91.466	0.765842	0.773297	0.778564
91.587	0.765933	0.77326	0.778591
91.678	0.766004	0.773193	0.778607
91.739	0.766049	0.773124	0.778613
91.83	0.766115	0.773089	0.778632
91.982	0.76623	0.772985	0.778645
92.073	0.766298	0.772932	0.778646
92.195	0.766389	0.772795	0.778634
92.255	0.766432	0.77275	0.778627
92.347	0.766503	0.77262	0.778608
92.498	0.766614	0.772516	0.778574
92.559	0.766655	0.772386	0.77853
92.684	0.766748	0.772279	0.778477
92.802	0.766834	0.772136	0.778379
92.894	0.766897	0.772031	0.778285
92.984	0.766971	0.771898	0.778214
93.076	0.767031	0.771797	0.77804
93.167	0.767094	0.771696	0.777966
93.288	0.767179	0.771556	0.777776
93.379	0.76725	0.771454	0.7777
93.501	0.767337	0.771321	0.777507
93.592	0.767399	0.771253	0.77739
93.684	0.767461	0.771118	0.777313
93.835	0.767562	0.771017	0.777115
93.927	0.767629	0.770876	0.776995
93.987	0.76767	0.770774	0.776839
94.109	0.767757	0.770671	0.776715
94.2	0.767815	0.770564	0.776565
94.291	0.76788	0.770427	0.776441
94.417	0.767959	0.770319	0.776268
94.504	0.768027	0.770215	0.776186
94.626	0.768106	0.770077	0.776021
94.717	0.768153	0.769961	0.775861
94.808	0.76822	0.769836	0.775708
94.93	0.768285	0.769679	0.775564
95.021	0.768353	0.769584	0.775432
		0.769458	0.775265
		0.769329	0.775102
		0.769211	0.774968
		0.769088
		0.768993
		0.768862
		0.768752	Ti [°C]
			85.0656
		Ti [°C]
		68.8166
		74.6758
		86.4955
			51.9817
			61.4801
		62.3296
		71.8389
		84.2981

## Sheet: MEAN AND SEM
								NCS1			MEAN	SEM	R452			MEAN	SEM
		NCS1	R	Error NCS1	Error Ric-8A			REPEAT 1	REPEAT 2	REPEAT 3	#DIV/0!					#DIV/0!	0
	NCS1 2mM EGTA	58.4333	0	0.785988			NCS1 2mM EGTA	58.9	56.9	59.5	58.4333	0.785988
	NCS1 Ca	90	0	0	0		NCS1 2mM Ca	90	90	90	90	0
	R452	0	53.4813	0	0.158445		R452						53.597	53.168	53.679	53.4813	0.158445
	NCS1 R452 af dial	79.7	82.7667	2.80951	2.63397		NCS1 R452 af dial	76.5	77.3	85.3	79.7	2.80951	85.3	77.5	85.5	82.7667	2.63397
	P2	87.2077	0	0.166014	0		P2	87	87.5359	87.0872	87.2077	0.166014
	P3	86.2831	0	0.650331	0		P3	87.2882	86.4955	85.0656	86.2831	0.650331
