# Supplementary material for: The neuronal calcium sensor NCS-1 regulates the phosphorylation state and activity of the Gα chaperone and GEF Ric-8A
Source: eLife journal article supplement (doi:10.7554/elife.86151), 2023-11-27
Supplement: supp [file Fig4B-nanoDSF.xlsx]

## Sheet: raw
	Raw data							Normalized (I-I0)/I0
[NaCl] (mM)	REPEAT 1	REPEAT 2	REPEAT 3	Mean	Normalized mean (I-I0)/I0		[NaCl] (mM)	REPEAT 1	REPEAT 2	REPEAT 3	Mean	SEM		Repeat 1 has been represented in the graphics
0	43.1	45.1	49.5	45.9	0		0	0	0	0	0	0
20	44.9	46.5	50.3	47.2333	0.0290487		20	0.041763	0.031042	0.016162	0.0296557	0.00742281
50	46.2	48.8	54.4	49.8	0.0849673		50	0.071926	0.08204	0.09899	0.0843187	0.00789534
100	48.5		56	52.25	0.138344		100	0.12529		0.13131	0.0855333	0.00301
150	49.7	53.9	58.4	54	0.176471		150	0.15313	0.19512	0.1798	0.176017	0.0122682
300	50.1	56.3	60.9	55.7667	0.21496		300	0.16241	0.24834	0.2303	0.213683	0.00902
	Raw data							Normalized (I-I0)/I0
[KCl] (mM)	REPEAT 1	REPEAT 2	REPEAT 3	Mean	Normalized mean (I-I0)/I0		[KCl] (mM)	REPEAT 1	REPEAT 2	REPEAT 3	Mean	SEM		Repeat 2 has been represented in the graphics
0	47.1	47.1	50.4	47.2	0		0	0	0	0	0	0
100	48.2	48.7		48.45	0.0264831		100	0.0233546	0.0339703		0.0339703	0.00530786
200	50.8	49.5		50.15	0.0625		200	0.0785563	0.0509554		0.0647558	0.0138004
300	51.3	51.1	52.1	51.5	0.0911017		300	0.089172	0.0849257	0.0337302	0.0593279	0.00212314
500	54.3	53.2	53.2	53.5667	0.134887		500	0.152866	0.129512	0.0555556	0.0925336	0.0293298
	Kaleidagraph calculated Kd and Sd (Na)					Kaleidagraph calculated Kd and Sd (Na)
	Kd	Sd				Kd	Sd
REPEAT 1	78.176	26.111			REPEAT 1	1431.1	983.92
REPEAT 2	167.73	49.8			REPEAT 2	high	high
REPEAT 3	142.16	56.269			REPEAT 3	4257.2	1704.4
Media	129.355	44.06			Media	2844.15	1344.16
