# Supplementary material for: The neuronal calcium sensor NCS-1 regulates the phosphorylation state and activity of the Gα chaperone and GEF Ric-8A
Source: eLife journal article supplement (doi:10.7554/elife.86151), 2023-11-27
Supplement: supp [file Fig4C-Chromatograms.xlsx]

## Sheet: Hoja1
Na+		K+
UV		UV
ml	mAU	ml	mAU
5.00021	-0.762032	5.00027	1.62025
5.00105	-0.762269	5.0011	1.61913
5.00188	-0.762703	5.00193	1.61878
5.00271	-0.762154	5.00277	1.61943
5.00354	-0.762789	5.0036	1.61914
5.00437	-0.761709	5.00443	1.61882
5.00521	-0.762786	5.00526	1.6185
5.00604	-0.762768	5.00609	1.61882
5.00687	-0.762757	5.00693	1.61861
5.0077	-0.762371	5.00776	1.61962
5.00853	-0.763328	5.00859	1.61997
5.00937	-0.763244	5.00942	1.62017
5.0102	-0.763656	5.01025	1.61984
5.01103	-0.76371	5.01109	1.61966
5.01186	-0.764108	5.01192	1.61978
5.01269	-0.764381	5.01275	1.61975
5.01353	-0.764577	5.01358	1.61982
5.01436	-0.763724	5.01441	1.62039
5.01519	-0.76299	5.01525	1.62151
5.01602	-0.761762	5.01608	1.62176
5.01685	-0.760836	5.01691	1.62156
5.01769	-0.760255	5.01774	1.62138
5.01852	-0.760398	5.01857	1.62162
5.01935	-0.760743	5.01941	1.62094
5.02018	-0.761512	5.02024	1.62102
5.02101	-0.761256	5.02107	1.62059
5.02185	-0.761834	5.0219	1.62034
5.02268	-0.761657	5.02273	1.62069
5.02351	-0.761986	5.02357	1.62029
5.02434	-0.761758	5.0244	1.61949
5.02517	-0.7615	5.02523	1.61923
5.02601	-0.760933	5.02606	1.61863
5.02684	-0.760656	5.02689	1.61804
5.02767	-0.759263	5.02773	1.61731
5.0285	-0.759343	5.02856	1.61719
5.02933	-0.759373	5.02939	1.61683
5.03017	-0.759128	5.03022	1.61707
5.031	-0.758653	5.03105	1.61791
5.03183	-0.758589	5.03189	1.61844
5.03266	-0.759297	5.03272	1.61898
5.03349	-0.758826	5.03355	1.6197
5.03432	-0.75822	5.03438	1.61944
5.03516	-0.758422	5.03521	1.61951
5.03599	-0.758683	5.03605	1.61958
5.03682	-0.75864	5.03688	1.61862
5.03765	-0.758621	5.03771	1.61717
5.03848	-0.759063	5.03854	1.6164
5.03932	-0.759952	5.03937	1.61624
5.04015	-0.760496	5.04021	1.61639
5.04098	-0.760317	5.04104	1.61697
5.04181	-0.760379	5.04187	1.6177
5.04265	-0.760671	5.0427	1.61805
5.04348	-0.761899	5.04354	1.61766
5.04431	-0.762449	5.04437	1.61659
5.04514	-0.761773	5.0452	1.61597
5.04597	-0.761352	5.04603	1.6163
5.0468	-0.760846	5.04686	1.61664
5.04764	-0.760261	5.0477	1.61671
5.04847	-0.760303	5.04853	1.61656
5.0493	-0.760224	5.04936	1.617
5.05013	-0.75981	5.05019	1.61784
5.05096	-0.759609	5.05102	1.61797
5.0518	-0.759088	5.05185	1.61862
5.05263	-0.758891	5.05269	1.61873
5.05346	-0.758279	5.05352	1.6181
5.05429	-0.758347	5.05435	1.61797
5.05512	-0.758057	5.05518	1.61813
5.05596	-0.758159	5.05602	1.61777
5.05679	-0.759484	5.05685	1.61765
5.05762	-0.760571	5.05768	1.61783
5.05845	-0.760572	5.05851	1.61809
5.05928	-0.760591	5.05934	1.61818
5.06012	-0.760768	5.06018	1.61797
5.06095	-0.760479	5.06101	1.61807
5.06178	-0.76024	5.06184	1.61798
5.06261	-0.7604	5.06267	1.6178
5.06344	-0.760461	5.0635	1.61798
5.06428	-0.760079	5.06433	1.61844
5.06511	-0.759641	5.06517	1.61986
5.06594	-0.759788	5.066	1.62026
5.06677	-0.760348	5.06683	1.62016
5.0676	-0.760896	5.06766	1.61989
5.06844	-0.761358	5.0685	1.62007
5.06927	-0.761998	5.06933	1.62068
5.0701	-0.76304	5.07016	1.62141
5.07093	-0.762784	5.07099	1.62194
5.07176	-0.76265	5.07182	1.62255
5.0726	-0.762424	5.07266	1.62244
5.07343	-0.761885	5.07349	1.62282
5.07426	-0.761455	5.07432	1.62274
5.07509	-0.760854	5.07515	1.62303
5.07592	-0.760564	5.07598	1.62338
5.07676	-0.760926	5.07681	1.62315
5.07759	-0.760553	5.07765	1.62281
5.07842	-0.759909	5.07848	1.62327
5.07925	-0.760205	5.07931	1.62396
5.08008	-0.761172	5.08014	1.62465
5.08092	-0.760984	5.08098	1.62497
5.08175	-0.760171	5.08181	1.62434
5.08258	-0.759174	5.08264	1.62379
5.08341	-0.759105	5.08347	1.62393
5.08424	-0.759092	5.0843	1.62319
5.08507	-0.759269	5.08514	1.62311
5.08591	-0.758648	5.08597	1.62332
5.08674	-0.758673	5.0868	1.62362
5.08757	-0.759152	5.08763	1.62362
5.0884	-0.759078	5.08846	1.6234
5.08923	-0.758386	5.08929	1.62337
5.09007	-0.759099	5.09013	1.62299
5.0909	-0.759215	5.09096	1.62165
5.09173	-0.759376	5.09179	1.62129
5.09256	-0.759037	5.09262	1.62087
5.09339	-0.758847	5.09346	1.62031
5.09423	-0.758911	5.09429	1.62032
5.09506	-0.758581	5.09512	1.62019
5.09589	-0.758884	5.09595	1.62003
5.09672	-0.758797	5.09678	1.61971
5.09755	-0.758418	5.09762	1.61972
5.09839	-0.758331	5.09845	1.61955
5.09922	-0.757889	5.09928	1.61966
5.10005	-0.757049	5.10011	1.61975
5.10088	-0.757706	5.10094	1.62003
5.10171	-0.758409	5.10178	1.61967
5.10255	-0.758049	5.10261	1.61917
5.10338	-0.758064	5.10344	1.61887
5.10421	-0.757852	5.10427	1.61951
5.10504	-0.756544	5.1051	1.61942
5.10587	-0.756503	5.10594	1.61963
5.10671	-0.757354	5.10677	1.61876
5.10754	-0.757669	5.1076	1.61986
5.10837	-0.757479	5.10843	1.62025
5.1092	-0.757708	5.10926	1.6206
5.11003	-0.757565	5.1101	1.6208
5.11087	-0.757088	5.11093	1.62084
5.1117	-0.756766	5.11176	1.62065
5.11253	-0.756559	5.11259	1.62065
5.11336	-0.756863	5.11342	1.62059
5.11419	-0.757454	5.11426	1.62072
5.11503	-0.758697	5.11509	1.62027
5.11586	-0.759697	5.11592	1.62011
5.11669	-0.760902	5.11675	1.62027
5.11752	-0.761709	5.11758	1.61918
5.11835	-0.761742	5.11842	1.61984
5.11918	-0.761888	5.11925	1.62015
5.12002	-0.762366	5.12008	1.6205
5.12085	-0.762506	5.12091	1.62079
5.12168	-0.761742	5.12174	1.62051
5.12251	-0.762296	5.12258	1.62058
5.12334	-0.763132	5.12341	1.62085
5.12418	-0.763645	5.12424	1.62147
5.12501	-0.764475	5.12507	1.6225
5.12584	-0.764786	5.12591	1.62263
5.12667	-0.764545	5.12674	1.62259
5.12751	-0.764905	5.12757	1.62347
5.12834	-0.765335	5.1284	1.6236
5.12917	-0.765851	5.12923	1.62412
5.13	-0.766748	5.13006	1.6244
5.13083	-0.766906	5.1309	1.62435
5.13166	-0.766071	5.13173	1.62428
5.1325	-0.766283	5.13256	1.62456
5.13333	-0.76636	5.13339	1.62465
5.13416	-0.766664	5.13422	1.62479
5.13499	-0.766768	5.13506	1.62489
5.13582	-0.766361	5.13589	1.62463
5.13666	-0.766602	5.13672	1.62503
5.13749	-0.766973	5.13755	1.62549
5.13832	-0.767759	5.13839	1.62528
5.13915	-0.767837	5.13922	1.62564
5.13998	-0.768021	5.14005	1.62553
5.14082	-0.768408	5.14088	1.62522
5.14165	-0.769256	5.14171	1.62531
5.14248	-0.768737	5.14255	1.62531
5.14331	-0.767729	5.14338	1.62504
5.14414	-0.768104	5.14421	1.62612
5.14498	-0.768011	5.14504	1.62628
5.14581	-0.768144	5.14587	1.62668
5.14664	-0.768941	5.1467	1.62672
5.14747	-0.768717	5.14754	1.62655
5.1483	-0.767694	5.14837	1.62605
5.14914	-0.766949	5.1492	1.62598
5.14997	-0.767447	5.15003	1.62541
5.1508	-0.767193	5.15086	1.62423
5.15163	-0.76672	5.1517	1.62396
5.15246	-0.766613	5.15253	1.62372
5.1533	-0.765562	5.15336	1.62354
5.15413	-0.764535	5.15419	1.62351
5.15496	-0.763951	5.15503	1.62304
5.15579	-0.763523	5.15586	1.6226
5.15662	-0.762657	5.15669	1.62225
5.15745	-0.762596	5.15752	1.62173
5.15829	-0.762075	5.15835	1.62167
5.15912	-0.760941	5.15918	1.62162
5.15995	-0.760823	5.16002	1.62153
5.16078	-0.760804	5.16085	1.62115
5.16162	-0.760561	5.16168	1.62057
5.16245	-0.760397	5.16251	1.6204
5.16328	-0.760664	5.16334	1.62016
5.16411	-0.760398	5.16418	1.61963
5.16494	-0.759909	5.16501	1.61894
5.16578	-0.759564	5.16584	1.61877
5.16661	-0.75915	5.16667	1.61872
5.16744	-0.758416	5.16751	1.61776
5.16827	-0.758467	5.16834	1.61692
5.1691	-0.758226	5.16917	1.61673
5.16993	-0.757484	5.17	1.61631
5.17077	-0.756683	5.17083	1.61558
5.1716	-0.757085	5.17166	1.61485
5.17243	-0.757747	5.1725	1.61407
5.17326	-0.758318	5.17333	1.61418
5.17409	-0.758422	5.17416	1.61449
5.17493	-0.757946	5.17499	1.61373
5.17576	-0.758088	5.17583	1.61295
5.17659	-0.758935	5.17666	1.61351
5.17742	-0.759392	5.17749	1.6137
5.17825	-0.759296	5.17832	1.6141
5.17909	-0.759686	5.17915	1.61383
5.17992	-0.75905	5.17999	1.61333
5.18075	-0.75929	5.18082	1.61348
5.18158	-0.759267	5.18165	1.61318
5.18241	-0.758605	5.18248	1.61338
5.18325	-0.75796	5.18331	1.61411
5.18408	-0.757751	5.18415	1.61417
5.18491	-0.75878	5.18498	1.61357
5.18574	-0.759192	5.18581	1.61307
5.18657	-0.76007	5.18664	1.61268
5.18741	-0.75996	5.18747	1.61227
5.18824	-0.760041	5.18831	1.61208
5.18907	-0.761044	5.18914	1.61203
5.1899	-0.762022	5.18997	1.61205
5.19073	-0.762509	5.1908	1.61201
5.19157	-0.761348	5.19163	1.6122
5.1924	-0.760576	5.19247	1.61274
5.19323	-0.760586	5.1933	1.61339
5.19406	-0.761413	5.19413	1.6133
5.19489	-0.763247	5.19496	1.61339
5.19573	-0.765068	5.19579	1.61313
5.19656	-0.76533	5.19663	1.6137
5.19739	-0.765509	5.19746	1.61456
5.19822	-0.765834	5.19829	1.61478
5.19905	-0.765507	5.19912	1.61533
5.19989	-0.764314	5.19995	1.61532
5.20072	-0.764556	5.20079	1.61549
5.20155	-0.764103	5.20162	1.6155
5.20238	-0.763608	5.20245	1.61567
5.20321	-0.764758	5.20328	1.61614
5.20404	-0.765155	5.20411	1.61671
5.20488	-0.765189	5.20495	1.61706
5.20571	-0.764526	5.20578	1.61736
5.20654	-0.764627	5.20661	1.61779
5.20737	-0.765315	5.20744	1.61783
5.20821	-0.764952	5.20827	1.61793
5.20904	-0.765468	5.20911	1.61844
5.20987	-0.765442	5.20994	1.61912
5.2107	-0.765156	5.21077	1.62033
5.21153	-0.766225	5.2116	1.62095
5.21236	-0.766348	5.21243	1.62168
5.2132	-0.765024	5.21327	1.62212
5.21403	-0.764623	5.2141	1.62264
5.21486	-0.764317	5.21493	1.62257
5.21569	-0.765449	5.21576	1.62236
5.21652	-0.765848	5.21659	1.62196
5.21736	-0.765838	5.21743	1.62195
5.21819	-0.765415	5.21826	1.62185
5.21902	-0.76581	5.21909	1.6223
5.21985	-0.765376	5.21992	1.62282
5.22068	-0.764096	5.22075	1.62322
5.22152	-0.764795	5.22159	1.62362
5.22235	-0.764619	5.22242	1.62366
5.22318	-0.764974	5.22325	1.62393
5.22401	-0.764649	5.22408	1.6236
5.22484	-0.764306	5.22492	1.62278
5.22568	-0.765118	5.22575	1.62251
5.22651	-0.764636	5.22658	1.62247
5.22734	-0.763935	5.22741	1.62241
5.22817	-0.763986	5.22824	1.62227
5.229	-0.764521	5.22907	1.62245
5.22984	-0.764944	5.22991	1.62273
5.23067	-0.763993	5.23074	1.62281
5.2315	-0.763433	5.23157	1.62336
5.23233	-0.76351	5.2324	1.62359
5.23316	-0.764016	5.23323	1.62394
5.234	-0.76411	5.23407	1.62463
5.23483	-0.763911	5.2349	1.62515
5.23566	-0.763148	5.23573	1.62582
5.23649	-0.763301	5.23656	1.62586
5.23732	-0.76255	5.2374	1.62618
5.23815	-0.761596	5.23823	1.62614
5.23899	-0.760793	5.23906	1.62592
5.23982	-0.760271	5.23989	1.62533
5.24065	-0.761075	5.24072	1.62497
5.24148	-0.761821	5.24155	1.62451
5.24231	-0.761733	5.24239	1.62348
5.24315	-0.76159	5.24322	1.62354
5.24398	-0.762167	5.24405	1.62386
5.24481	-0.761284	5.24488	1.62368
5.24564	-0.760706	5.24571	1.6235
5.24648	-0.760704	5.24655	1.62377
5.24731	-0.761259	5.24738	1.62443
5.24814	-0.761784	5.24821	1.62485
5.24897	-0.76122	5.24904	1.62521
5.2498	-0.760891	5.24988	1.62526
5.25063	-0.760938	5.25071	1.62544
5.25147	-0.759976	5.25154	1.62548
5.2523	-0.759944	5.25237	1.62581
5.25313	-0.759303	5.2532	1.62605
5.25396	-0.759066	5.25404	1.62588
5.25479	-0.759316	5.25487	1.62597
5.25563	-0.760063	5.2557	1.62619
5.25646	-0.760022	5.25653	1.62572
5.25729	-0.758924	5.25736	1.6254
5.25812	-0.758835	5.25819	1.62609
5.25895	-0.757909	5.25903	1.62602
5.25979	-0.75755	5.25986	1.62514
5.26062	-0.757858	5.26069	1.62441
5.26145	-0.759119	5.26152	1.62372
5.26228	-0.759427	5.26236	1.62296
5.26311	-0.759143	5.26319	1.62249
5.26395	-0.759868	5.26402	1.62223
5.26478	-0.759788	5.26485	1.62191
5.26561	-0.760881	5.26568	1.62207
5.26644	-0.761515	5.26652	1.62232
5.26727	-0.760651	5.26735	1.62293
5.26811	-0.760489	5.26818	1.62407
5.26894	-0.760884	5.26901	1.62479
5.26977	-0.760302	5.26984	1.62498
5.2706	-0.761056	5.27067	1.62474
5.27143	-0.761416	5.27151	1.62427
5.27226	-0.761895	5.27234	1.62333
5.2731	-0.762688	5.27317	1.62282
5.27393	-0.762826	5.274	1.62252
5.27476	-0.762713	5.27484	1.62145
5.27559	-0.763312	5.27567	1.62081
5.27642	-0.764412	5.2765	1.62015
5.27726	-0.764665	5.27733	1.62001
5.27809	-0.764504	5.27816	1.61984
5.27892	-0.765451	5.279	1.61876
5.27975	-0.766316	5.27983	1.61766
5.28059	-0.766739	5.28066	1.61696
5.28142	-0.766838	5.28149	1.61685
5.28225	-0.766477	5.28232	1.61693
5.28308	-0.767213	5.28315	1.61766
5.28391	-0.768342	5.28399	1.61838
5.28475	-0.768477	5.28482	1.61833
5.28558	-0.768186	5.28565	1.61832
5.28641	-0.768388	5.28648	1.61797
5.28724	-0.768379	5.28732	1.6174
5.28807	-0.768039	5.28815	1.61704
5.2889	-0.767941	5.28898	1.61582
5.28974	-0.767878	5.28981	1.61555
5.29057	-0.768089	5.29064	1.61529
5.2914	-0.767727	5.29148	1.61485
5.29223	-0.767905	5.29231	1.61385
5.29306	-0.768266	5.29314	1.61384
5.2939	-0.767641	5.29397	1.61313
5.29473	-0.767254	5.2948	1.6125
5.29556	-0.767588	5.29564	1.61272
5.29639	-0.76786	5.29647	1.61205
5.29722	-0.768086	5.2973	1.61155
5.29806	-0.768682	5.29813	1.61208
5.29889	-0.768338	5.29896	1.61275
5.29972	-0.768219	5.2998	1.61299
5.30055	-0.768836	5.30063	1.61299
5.30138	-0.768711	5.30146	1.61311
5.30222	-0.768295	5.30229	1.61306
5.30305	-0.76817	5.30312	1.61303
5.30388	-0.768298	5.30396	1.61376
5.30471	-0.767958	5.30479	1.61408
5.30554	-0.767722	5.30562	1.6142
5.30638	-0.768127	5.30645	1.6142
5.30721	-0.768266	5.30728	1.61417
5.30804	-0.768914	5.30812	1.61413
5.30887	-0.769637	5.30895	1.61341
5.3097	-0.769461	5.30978	1.61297
5.31053	-0.76966	5.31061	1.6123
5.31137	-0.769365	5.31144	1.61234
5.3122	-0.768604	5.31228	1.61238
5.31303	-0.768015	5.31311	1.61237
5.31386	-0.767637	5.31394	1.61265
5.3147	-0.76802	5.31477	1.61272
5.31553	-0.768829	5.3156	1.61369
5.31636	-0.769224	5.31644	1.61386
5.31719	-0.76842	5.31727	1.61458
5.31802	-0.767802	5.3181	1.61443
5.31886	-0.767451	5.31893	1.61431
5.31969	-0.767104	5.31977	1.61438
5.32052	-0.766826	5.3206	1.61547
5.32135	-0.766705	5.32143	1.61601
5.32218	-0.766558	5.32226	1.61633
5.32301	-0.766583	5.32309	1.61626
5.32385	-0.767282	5.32393	1.61606
5.32468	-0.766884	5.32476	1.61552
5.32551	-0.766439	5.32559	1.61556
5.32634	-0.766605	5.32642	1.61515
5.32718	-0.766278	5.32725	1.61389
5.32801	-0.766256	5.32808	1.61367
5.32884	-0.766664	5.32892	1.61308
5.32967	-0.766808	5.32975	1.61332
5.3305	-0.767065	5.33058	1.61442
5.33133	-0.767005	5.33141	1.61417
5.33217	-0.767671	5.33225	1.61417
5.333	-0.76816	5.33308	1.61437
5.33383	-0.768255	5.33391	1.61418
5.33466	-0.768083	5.33474	1.61383
5.33549	-0.768278	5.33557	1.61359
5.33633	-0.768203	5.33641	1.61453
5.33716	-0.767739	5.33724	1.61474
5.33799	-0.767522	5.33807	1.61528
5.33882	-0.767287	5.3389	1.61485
5.33965	-0.766832	5.33973	1.61536
5.34049	-0.766688	5.34056	1.61526
5.34132	-0.766952	5.3414	1.61546
5.34215	-0.767621	5.34223	1.61638
5.34298	-0.768355	5.34306	1.61708
5.34381	-0.768854	5.34389	1.61661
5.34465	-0.768406	5.34473	1.61662
5.34548	-0.768677	5.34556	1.61616
5.34631	-0.768487	5.34639	1.61544
5.34714	-0.768136	5.34722	1.61568
5.34797	-0.767425	5.34805	1.61639
5.3488	-0.766429	5.34889	1.61572
5.34964	-0.765417	5.34972	1.61543
5.35047	-0.764592	5.35055	1.61516
5.3513	-0.764675	5.35138	1.61475
5.35213	-0.764648	5.35221	1.61479
5.35297	-0.764277	5.35304	1.61475
5.3538	-0.763859	5.35388	1.61476
5.35463	-0.764074	5.35471	1.61502
5.35546	-0.764156	5.35554	1.61505
5.35629	-0.764148	5.35637	1.61456
5.35712	-0.763438	5.35721	1.61424
5.35796	-0.76275	5.35804	1.615
5.35879	-0.762393	5.35887	1.61408
5.35962	-0.762132	5.3597	1.614
5.36045	-0.762238	5.36053	1.61384
5.36128	-0.762262	5.36137	1.61422
5.36212	-0.761909	5.3622	1.61421
5.36295	-0.761761	5.36303	1.61365
5.36378	-0.761977	5.36386	1.61322
5.36461	-0.761356	5.36469	1.61343
5.36545	-0.760872	5.36552	1.61405
5.36628	-0.760355	5.36636	1.61435
5.36711	-0.759747	5.36719	1.61323
5.36794	-0.759916	5.36802	1.61352
5.36877	-0.76002	5.36885	1.61424
5.3696	-0.759975	5.36969	1.61486
5.37044	-0.760428	5.37052	1.61621
5.37127	-0.760213	5.37135	1.61642
5.3721	-0.760164	5.37218	1.61671
5.37293	-0.759081	5.37301	1.61769
5.37376	-0.758283	5.37385	1.61805
5.3746	-0.757721	5.37468	1.61741
5.37543	-0.757814	5.37551	1.61775
5.37626	-0.758126	5.37634	1.61749
5.37709	-0.758211	5.37717	1.61755
5.37792	-0.758808	5.37801	1.61675
5.37876	-0.759447	5.37884	1.61591
5.37959	-0.759223	5.37967	1.61548
5.38042	-0.760216	5.3805	1.6155
5.38125	-0.759536	5.38133	1.61533
5.38208	-0.759161	5.38217	1.61542
5.38291	-0.759568	5.383	1.61572
5.38375	-0.759896	5.38383	1.61583
5.38458	-0.759357	5.38466	1.61646
5.38541	-0.758633	5.38549	1.6168
5.38624	-0.757648	5.38633	1.61676
5.38708	-0.757283	5.38716	1.61688
5.38791	-0.757793	5.38799	1.61709
5.38874	-0.757336	5.38882	1.61655
5.38957	-0.757767	5.38965	1.61623
5.3904	-0.757917	5.39049	1.6167
5.39123	-0.758244	5.39132	1.61737
5.39207	-0.758467	5.39215	1.618
5.3929	-0.757535	5.39298	1.61804
5.39373	-0.757888	5.39381	1.61849
5.39456	-0.757507	5.39465	1.61891
5.39539	-0.758061	5.39548	1.61889
5.39623	-0.759387	5.39631	1.61886
5.39706	-0.759598	5.39714	1.61921
5.39789	-0.760046	5.39797	1.6197
5.39872	-0.76046	5.39881	1.61951
5.39956	-0.76129	5.39964	1.61961
5.40039	-0.76037	5.40047	1.62031
5.40122	-0.761242	5.4013	1.6201
5.40205	-0.761267	5.40213	1.61942
5.40288	-0.760776	5.40297	1.61852
5.40372	-0.761001	5.4038	1.61821
5.40455	-0.760774	5.40463	1.61878
5.40538	-0.760489	5.40546	1.61901
5.40621	-0.761738	5.40629	1.61831
5.40704	-0.761947	5.40713	1.61773
5.40787	-0.762117	5.40796	1.61798
5.40871	-0.762098	5.40879	1.61849
5.40954	-0.762799	5.40962	1.61897
5.41037	-0.762199	5.41045	1.619
5.4112	-0.762587	5.41129	1.61823
5.41203	-0.76141	5.41212	1.6175
5.41287	-0.761352	5.41295	1.61739
5.4137	-0.761883	5.41378	1.61675
5.41453	-0.76263	5.41461	1.61547
5.41536	-0.763428	5.41545	1.61482
5.41619	-0.763952	5.41628	1.615
5.41703	-0.763793	5.41711	1.61435
5.41786	-0.763882	5.41794	1.61405
5.41869	-0.763862	5.41878	1.61369
5.41952	-0.763273	5.41961	1.61358
5.42035	-0.762076	5.42044	1.61371
5.42119	-0.762698	5.42127	1.61403
5.42202	-0.762162	5.4221	1.61455
5.42285	-0.76279	5.42293	1.61497
5.42368	-0.763402	5.42377	1.61489
5.42451	-0.763139	5.4246	1.61434
5.42535	-0.763464	5.42543	1.61367
5.42618	-0.763098	5.42626	1.61335
5.42701	-0.763899	5.42709	1.61282
5.42784	-0.765024	5.42793	1.6123
5.42867	-0.765564	5.42876	1.61214
5.4295	-0.764558	5.42959	1.61241
5.43034	-0.765302	5.43042	1.61271
5.43117	-0.765413	5.43126	1.61301
5.432	-0.764913	5.43209	1.61389
5.43283	-0.765525	5.43292	1.61388
5.43367	-0.766397	5.43375	1.6135
5.4345	-0.766947	5.43458	1.61261
5.43533	-0.767547	5.43541	1.61217
5.43616	-0.768493	5.43625	1.61216
5.43699	-0.768364	5.43708	1.61159
5.43783	-0.766941	5.43791	1.6117
5.43866	-0.766129	5.43874	1.61232
5.43949	-0.765717	5.43957	1.6125
5.44032	-0.764855	5.44041	1.61211
5.44115	-0.764889	5.44124	1.61221
5.44198	-0.765715	5.44207	1.61249
5.44282	-0.765142	5.4429	1.6114
5.44365	-0.765417	5.44374	1.6121
5.44448	-0.765327	5.44457	1.61323
5.44531	-0.76549	5.4454	1.61322
5.44614	-0.765723	5.44623	1.61388
5.44698	-0.765257	5.44706	1.61374
5.44781	-0.764853	5.44789	1.61424
5.44864	-0.765111	5.44873	1.61414
5.44947	-0.765244	5.44956	1.61461
5.45031	-0.764678	5.45039	1.61465
5.45114	-0.763555	5.45122	1.61538
5.45197	-0.7638	5.45205	1.6153
5.4528	-0.763125	5.45289	1.61469
5.45363	-0.763605	5.45372	1.61608
5.45446	-0.763295	5.45455	1.61667
5.4553	-0.763127	5.45538	1.61633
5.45613	-0.763878	5.45622	1.6161
5.45696	-0.764078	5.45705	1.61611
5.45779	-0.764526	5.45788	1.61644
5.45862	-0.764559	5.45871	1.61654
5.45946	-0.763818	5.45954	1.61777
5.46029	-0.763516	5.46037	1.61881
5.46112	-0.764232	5.46121	1.61927
5.46195	-0.764512	5.46204	1.6197
5.46278	-0.764496	5.46287	1.62016
5.46362	-0.763718	5.4637	1.62055
5.46445	-0.764195	5.46453	1.62042
5.46528	-0.764636	5.46537	1.61955
5.46611	-0.765113	5.4662	1.61916
5.46694	-0.764837	5.46703	1.62029
5.46777	-0.764893	5.46786	1.621
5.46861	-0.764779	5.4687	1.62038
5.46944	-0.763923	5.46953	1.62038
5.47027	-0.763831	5.47036	1.62082
5.4711	-0.764327	5.47119	1.62149
5.47194	-0.763839	5.47202	1.62122
5.47277	-0.763628	5.47286	1.62161
5.4736	-0.764205	5.47369	1.62106
5.47443	-0.763795	5.47452	1.62122
5.47526	-0.762715	5.47535	1.62138
5.47609	-0.762788	5.47618	1.6219
5.47693	-0.762695	5.47701	1.62246
5.47776	-0.762864	5.47785	1.62254
5.47859	-0.762288	5.47868	1.62228
5.47942	-0.762749	5.47951	1.62213
5.48025	-0.763178	5.48034	1.62199
5.48109	-0.763532	5.48118	1.62196
5.48192	-0.763748	5.48201	1.62191
5.48275	-0.763068	5.48284	1.62121
5.48358	-0.762249	5.48367	1.62138
5.48442	-0.762881	5.4845	1.62134
5.48525	-0.763428	5.48534	1.62128
5.48608	-0.763828	5.48617	1.62043
5.48691	-0.763748	5.487	1.62058
5.48774	-0.764149	5.48783	1.62065
5.48857	-0.764429	5.48866	1.62093
5.48941	-0.764389	5.4895	1.62081
5.49024	-0.765038	5.49033	1.62121
5.49107	-0.76532	5.49116	1.6212
5.4919	-0.766055	5.49199	1.62186
5.49273	-0.766716	5.49282	1.62143
5.49357	-0.767106	5.49366	1.62121
5.4944	-0.767486	5.49449	1.62188
5.49523	-0.767587	5.49532	1.62109
5.49606	-0.767891	5.49615	1.62095
5.49689	-0.767635	5.49698	1.62093
5.49773	-0.767249	5.49782	1.62095
5.49856	-0.767009	5.49865	1.62098
5.49939	-0.766715	5.49948	1.62058
5.50022	-0.767191	5.50031	1.6203
5.50105	-0.767682	5.50114	1.61991
5.50189	-0.767492	5.50198	1.61934
5.50272	-0.767575	5.50281	1.61874
5.50355	-0.767698	5.50364	1.61917
5.50438	-0.767988	5.50447	1.61866
5.50521	-0.768624	5.5053	1.61911
5.50605	-0.767976	5.50614	1.61936
5.50688	-0.767273	5.50697	1.62008
5.50771	-0.767443	5.5078	1.62054
5.50854	-0.767976	5.50863	1.61978
5.50937	-0.767942	5.50946	1.61931
5.51021	-0.768013	5.5103	1.61952
5.51104	-0.768382	5.51113	1.62052
5.51187	-0.768454	5.51196	1.62061
5.5127	-0.768071	5.51279	1.62029
5.51353	-0.76761	5.51363	1.6197
5.51436	-0.767636	5.51446	1.61938
5.5152	-0.767507	5.51529	1.61954
5.51603	-0.767289	5.51612	1.61934
5.51686	-0.767756	5.51695	1.61952
5.51769	-0.76796	5.51778	1.61952
5.51853	-0.767459	5.51862	1.61876
5.51936	-0.767606	5.51945	1.61758
5.52019	-0.767995	5.52028	1.61818
5.52102	-0.76774	5.52111	1.61758
5.52185	-0.767676	5.52194	1.6168
5.52269	-0.76753	5.52278	1.61661
5.52352	-0.766985	5.52361	1.61686
5.52435	-0.766726	5.52444	1.61744
5.52518	-0.76682	5.52527	1.6167
5.52601	-0.766628	5.52611	1.61665
5.52684	-0.76614	5.52694	1.61608
5.52768	-0.765937	5.52777	1.61591
5.52851	-0.76592	5.5286	1.61645
5.52934	-0.765158	5.52943	1.61619
5.53017	-0.765041	5.53026	1.61529
5.531	-0.764629	5.5311	1.61506
5.53184	-0.764334	5.53193	1.61567
5.53267	-0.764549	5.53276	1.61604
5.5335	-0.764398	5.53359	1.61526
5.53433	-0.764413	5.53442	1.61528
5.53516	-0.764627	5.53526	1.61588
5.536	-0.764767	5.53609	1.61629
5.53683	-0.764728	5.53692	1.61734
5.53766	-0.764536	5.53775	1.61724
5.53849	-0.764652	5.53859	1.61697
5.53932	-0.764511	5.53942	1.61649
5.54016	-0.764268	5.54025	1.61678
5.54099	-0.76415	5.54108	1.61622
5.54182	-0.763296	5.54191	1.61683
5.54265	-0.763049	5.54275	1.61666
5.54348	-0.763673	5.54358	1.61716
5.54432	-0.764168	5.54441	1.61742
5.54515	-0.764053	5.54524	1.6163
5.54598	-0.763718	5.54607	1.61688
5.54681	-0.763315	5.5469	1.61656
5.54764	-0.763099	5.54774	1.61618
5.54847	-0.76298	5.54857	1.61568
5.54931	-0.76295	5.5494	1.61497
5.55014	-0.763006	5.55023	1.61453
5.55097	-0.762331	5.55107	1.61463
5.5518	-0.761886	5.5519	1.61414
5.55264	-0.761295	5.55273	1.61322
5.55347	-0.760798	5.55356	1.61375
5.5543	-0.760956	5.55439	1.61323
5.55513	-0.7618	5.55523	1.61377
5.55596	-0.762015	5.55606	1.61346
5.5568	-0.762121	5.55689	1.61353
5.55763	-0.762405	5.55772	1.61347
5.55846	-0.762232	5.55855	1.6134
5.55929	-0.761697	5.55938	1.61254
5.56012	-0.761281	5.56022	1.61371
5.56095	-0.761717	5.56105	1.615
5.56179	-0.762287	5.56188	1.61475
5.56262	-0.761997	5.56271	1.6154
5.56345	-0.761583	5.56355	1.61574
5.56428	-0.761588	5.56438	1.61582
5.56511	-0.762509	5.56521	1.61595
5.56595	-0.763769	5.56604	1.61605
5.56678	-0.764509	5.56687	1.61613
5.56761	-0.764298	5.56771	1.61597
5.56844	-0.76462	5.56854	1.61618
5.56927	-0.764433	5.56937	1.61674
5.57011	-0.764779	5.5702	1.61595
5.57094	-0.764972	5.57103	1.61536
5.57177	-0.764684	5.57187	1.61563
5.5726	-0.765079	5.5727	1.61488
5.57343	-0.764165	5.57353	1.61438
5.57427	-0.76381	5.57436	1.61404
5.5751	-0.763184	5.57519	1.61364
5.57593	-0.763621	5.57603	1.61337
5.57676	-0.76383	5.57686	1.61299
5.57759	-0.763443	5.57769	1.61227
5.57843	-0.76277	5.57852	1.61138
5.57926	-0.763367	5.57935	1.61169
5.58009	-0.763088	5.58019	1.61139
5.58092	-0.764209	5.58102	1.6119
5.58175	-0.764295	5.58185	1.61205
5.58259	-0.764415	5.58268	1.61233
5.58342	-0.764673	5.58351	1.61216
5.58425	-0.764797	5.58435	1.61218
5.58508	-0.764144	5.58518	1.61144
5.58591	-0.764313	5.58601	1.61096
5.58674	-0.764445	5.58684	1.61142
5.58758	-0.764367	5.58767	1.6112
5.58841	-0.764436	5.58851	1.61102
5.58924	-0.765091	5.58934	1.61127
5.59007	-0.764657	5.59017	1.61162
5.59091	-0.764367	5.591	1.61251
5.59174	-0.764484	5.59183	1.61257
5.59257	-0.764696	5.59267	1.61242
5.5934	-0.764787	5.5935	1.61309
5.59423	-0.76586	5.59433	1.61321
5.59506	-0.764749	5.59516	1.61312
5.5959	-0.764996	5.59599	1.6134
5.59673	-0.764353	5.59683	1.61386
5.59756	-0.765212	5.59766	1.61387
5.59839	-0.765757	5.59849	1.61347
5.59922	-0.76543	5.59932	1.61312
5.60006	-0.764814	5.60015	1.61301
5.60089	-0.765963	5.60099	1.6137
5.60172	-0.765034	5.60182	1.61374
5.60255	-0.764187	5.60265	1.61365
5.60338	-0.763707	5.60348	1.61374
5.60422	-0.76455	5.60431	1.61416
5.60505	-0.76444	5.60515	1.6147
5.60588	-0.764207	5.60598	1.61488
5.60671	-0.763588	5.60681	1.614
5.60754	-0.762768	5.60764	1.6135
5.60838	-0.762709	5.60847	1.61348
5.60921	-0.762866	5.60931	1.61364
5.61004	-0.762648	5.61014	1.61366
5.61087	-0.762603	5.61097	1.61368
5.6117	-0.762695	5.6118	1.61433
5.61254	-0.763381	5.61264	1.61504
5.61337	-0.763191	5.61347	1.61514
5.6142	-0.762676	5.6143	1.61521
5.61503	-0.763038	5.61513	1.61488
5.61586	-0.762695	5.61596	1.61498
5.6167	-0.762604	5.61679	1.61546
5.61753	-0.762185	5.61763	1.61574
5.61836	-0.761838	5.61846	1.61616
5.61919	-0.763026	5.61929	1.61651
5.62002	-0.763365	5.62012	1.6162
5.62086	-0.76281	5.62096	1.6159
5.62169	-0.762712	5.62179	1.61661
5.62252	-0.762572	5.62262	1.61678
5.62335	-0.761749	5.62345	1.61668
5.62418	-0.76169	5.62428	1.6164
5.62502	-0.762434	5.62512	1.61559
5.62585	-0.763159	5.62595	1.61516
5.62668	-0.763237	5.62678	1.61516
5.62751	-0.762648	5.62761	1.61485
5.62834	-0.76287	5.62844	1.61475
5.62918	-0.763368	5.62927	1.61512
5.63001	-0.763541	5.63011	1.61525
5.63084	-0.763331	5.63094	1.61495
5.63167	-0.76341	5.63177	1.61427
5.6325	-0.763489	5.6326	1.61399
5.63333	-0.763108	5.63344	1.6144
5.63417	-0.763367	5.63427	1.61452
5.635	-0.763789	5.6351	1.61448
5.63583	-0.763839	5.63593	1.61421
5.63666	-0.763987	5.63676	1.61373
5.6375	-0.765059	5.6376	1.61344
5.63833	-0.765841	5.63843	1.61358
5.63916	-0.765974	5.63926	1.61369
5.63999	-0.765043	5.64009	1.61404
5.64082	-0.764532	5.64092	1.61457
5.64165	-0.765184	5.64175	1.61454
5.64249	-0.765285	5.64259	1.61392
5.64332	-0.764295	5.64342	1.61379
5.64415	-0.765408	5.64425	1.61435
5.64498	-0.765343	5.64508	1.61441
5.64581	-0.764914	5.64591	1.61418
5.64665	-0.764337	5.64675	1.61367
5.64748	-0.765188	5.64758	1.61395
5.64831	-0.765077	5.64841	1.61471
5.64914	-0.765246	5.64924	1.61537
5.64997	-0.764797	5.65008	1.61612
5.65081	-0.76425	5.65091	1.6164
5.65164	-0.764661	5.65174	1.61668
5.65247	-0.764865	5.65257	1.61712
5.6533	-0.764563	5.6534	1.61697
5.65413	-0.764554	5.65423	1.61694
5.65497	-0.76458	5.65507	1.61697
5.6558	-0.764575	5.6559	1.61687
5.65663	-0.76491	5.65673	1.6173
5.65746	-0.765073	5.65756	1.61757
5.65829	-0.765179	5.65839	1.61774
5.65913	-0.765263	5.65923	1.61706
5.65996	-0.764811	5.66006	1.61616
5.66079	-0.764607	5.66089	1.6164
5.66162	-0.764513	5.66172	1.6169
5.66245	-0.764299	5.66256	1.6173
5.66329	-0.764675	5.66339	1.61764
5.66412	-0.764948	5.66422	1.61842
5.66495	-0.764767	5.66505	1.61836
5.66578	-0.765176	5.66588	1.61908
5.66661	-0.765732	5.66672	1.61959
5.66744	-0.765376	5.66755	1.61944
5.66828	-0.764491	5.66838	1.62022
5.66911	-0.764105	5.66921	1.62075
5.66994	-0.764134	5.67004	1.62113
5.67077	-0.763803	5.67088	1.6211
5.6716	-0.763323	5.67171	1.62097
5.67244	-0.762997	5.67254	1.62175
5.67327	-0.763133	5.67337	1.62254
5.6741	-0.763111	5.6742	1.62232
5.67493	-0.763093	5.67504	1.62148
5.67577	-0.76322	5.67587	1.62168
5.6766	-0.762776	5.6767	1.62113
5.67743	-0.762038	5.67753	1.62105
5.67826	-0.761652	5.67836	1.62164
5.67909	-0.761533	5.6792	1.6226
5.67992	-0.761335	5.68003	1.62254
5.68076	-0.761282	5.68086	1.62268
5.68159	-0.761101	5.68169	1.62266
5.68242	-0.761017	5.68252	1.62269
5.68325	-0.761044	5.68336	1.62306
5.68408	-0.76107	5.68419	1.62389
5.68492	-0.761283	5.68502	1.62339
5.68575	-0.760849	5.68585	1.62237
5.68658	-0.760539	5.68668	1.62294
5.68741	-0.761105	5.68752	1.62238
5.68824	-0.761408	5.68835	1.62273
5.68908	-0.761172	5.68918	1.62178
5.68991	-0.760694	5.69001	1.62179
5.69074	-0.760198	5.69084	1.62177
5.69157	-0.76038	5.69168	1.62229
5.6924	-0.760739	5.69251	1.62239
5.69324	-0.760255	5.69334	1.62163
5.69407	-0.760599	5.69417	1.62083
5.6949	-0.76198	5.695	1.62081
5.69573	-0.762649	5.69584	1.6214
5.69656	-0.762117	5.69667	1.62143
5.6974	-0.76162	5.6975	1.62188
5.69823	-0.7619	5.69833	1.62168
5.69906	-0.762282	5.69916	1.62148
5.69989	-0.762492	5.7	1.62212
5.70072	-0.762734	5.70083	1.62314
5.70156	-0.763346	5.70166	1.62377
5.70239	-0.76381	5.70249	1.62338
5.70322	-0.76409	5.70332	1.62258
5.70405	-0.763947	5.70416	1.62225
5.70488	-0.763519	5.70499	1.62227
5.70572	-0.763949	5.70582	1.62233
5.70655	-0.764219	5.70665	1.62192
5.70738	-0.763601	5.70749	1.62166
5.70821	-0.762863	5.70832	1.62116
5.70904	-0.762724	5.70915	1.62216
5.70988	-0.762978	5.70998	1.62277
5.71071	-0.763059	5.71081	1.62303
5.71154	-0.763116	5.71164	1.62384
5.71237	-0.763376	5.71248	1.62283
5.7132	-0.763454	5.71331	1.62216
5.71403	-0.763396	5.71414	1.62225
5.71487	-0.76327	5.71497	1.62191
5.7157	-0.762881	5.7158	1.62213
5.71653	-0.762205	5.71664	1.62287
5.71736	-0.761877	5.71747	1.62344
5.71819	-0.761985	5.7183	1.62279
5.71903	-0.762449	5.71913	1.62339
5.71986	-0.763084	5.71997	1.62397
5.72069	-0.763557	5.7208	1.62406
5.72152	-0.763309	5.72163	1.62338
5.72235	-0.762924	5.72246	1.62312
5.72319	-0.762922	5.72329	1.6238
5.72402	-0.762771	5.72412	1.62386
5.72485	-0.762566	5.72496	1.62364
5.72568	-0.762483	5.72579	1.62422
5.72651	-0.762804	5.72662	1.62434
5.72735	-0.763269	5.72745	1.62454
5.72818	-0.763332	5.72828	1.62519
5.72901	-0.763222	5.72912	1.62528
5.72984	-0.763436	5.72995	1.62519
5.73067	-0.76368	5.73078	1.62529
5.73151	-0.764333	5.73161	1.62591
5.73234	-0.764536	5.73245	1.62655
5.73317	-0.763964	5.73328	1.62655
5.734	-0.763725	5.73411	1.626
5.73483	-0.764275	5.73494	1.62472
5.73567	-0.763793	5.73577	1.62357
5.7365	-0.76275	5.7366	1.62346
5.73733	-0.76281	5.73744	1.62335
5.73816	-0.76377	5.73827	1.62324
5.73899	-0.764092	5.7391	1.62296
5.73983	-0.76388	5.73993	1.62288
5.74066	-0.763745	5.74076	1.62246
5.74149	-0.764333	5.7416	1.62239
5.74232	-0.764564	5.74243	1.62172
5.74315	-0.763795	5.74326	1.62055
5.74399	-0.763245	5.74409	1.62013
5.74482	-0.763376	5.74493	1.62022
5.74565	-0.764295	5.74576	1.62066
5.74648	-0.764438	5.74659	1.62076
5.74731	-0.763468	5.74742	1.62049
5.74815	-0.763223	5.74825	1.62011
5.74898	-0.764371	5.74909	1.62044
5.74981	-0.765812	5.74992	1.62097
5.75064	-0.766176	5.75075	1.62117
5.75147	-0.766469	5.75158	1.62075
5.7523	-0.767166	5.75241	1.62067
5.75314	-0.767802	5.75324	1.61964
5.75397	-0.767551	5.75408	1.61933
5.7548	-0.767769	5.75491	1.61955
5.75563	-0.768316	5.75574	1.61988
5.75647	-0.767945	5.75657	1.62004
5.7573	-0.767432	5.75741	1.61987
5.75813	-0.767623	5.75824	1.61945
5.75896	-0.767818	5.75907	1.61938
5.75979	-0.768227	5.7599	1.62028
5.76063	-0.768374	5.76073	1.62062
5.76146	-0.768325	5.76157	1.62062
5.76229	-0.767712	5.7624	1.62055
5.76312	-0.767951	5.76323	1.62034
5.76395	-0.768028	5.76406	1.62012
5.76478	-0.768164	5.76489	1.61986
5.76562	-0.768178	5.76573	1.6197
5.76645	-0.767697	5.76656	1.61967
5.76728	-0.767809	5.76739	1.61943
5.76811	-0.767517	5.76822	1.6193
5.76894	-0.767452	5.76905	1.61908
5.76978	-0.767362	5.76989	1.61812
5.77061	-0.76735	5.77072	1.61795
5.77144	-0.767025	5.77155	1.61807
5.77227	-0.766587	5.77238	1.61779
5.7731	-0.765912	5.77321	1.61685
5.77394	-0.767335	5.77405	1.61636
5.77477	-0.768492	5.77488	1.61555
5.7756	-0.768741	5.77571	1.61559
5.77643	-0.768233	5.77654	1.61641
5.77726	-0.768443	5.77737	1.61733
5.7781	-0.76902	5.77821	1.61777
5.77893	-0.768472	5.77904	1.61861
5.77976	-0.768208	5.77987	1.6188
5.78059	-0.769128	5.7807	1.61913
5.78142	-0.769202	5.78153	1.61941
5.78226	-0.769414	5.78237	1.61958
5.78309	-0.768064	5.7832	1.61942
5.78392	-0.767643	5.78403	1.61964
5.78475	-0.767671	5.78486	1.62001
5.78558	-0.767671	5.78569	1.61968
5.78642	-0.767112	5.78653	1.61962
5.78725	-0.766888	5.78736	1.61986
5.78808	-0.767092	5.78819	1.61996
5.78891	-0.767312	5.78902	1.61954
5.78974	-0.766715	5.78985	1.61904
5.79057	-0.765501	5.79069	1.61882
5.79141	-0.765168	5.79152	1.61928
5.79224	-0.765314	5.79235	1.61914
5.79307	-0.764841	5.79318	1.61941
5.7939	-0.76457	5.79401	1.61958
5.79474	-0.764619	5.79485	1.62006
5.79557	-0.764931	5.79568	1.62013
5.7964	-0.763751	5.79651	1.6195
5.79723	-0.762945	5.79734	1.6186
5.79806	-0.763268	5.79817	1.61751
5.79889	-0.764394	5.79901	1.61689
5.79973	-0.764766	5.79984	1.61695
5.80056	-0.764295	5.80067	1.61694
5.80139	-0.763615	5.8015	1.61668
5.80222	-0.762794	5.80233	1.61656
5.80305	-0.763027	5.80317	1.61644
5.80389	-0.76359	5.804	1.61706
5.80472	-0.763653	5.80483	1.6169
5.80555	-0.764735	5.80566	1.61665
5.80638	-0.765507	5.80649	1.61673
5.80721	-0.765812	5.80733	1.61674
5.80805	-0.767302	5.80816	1.61758
5.80888	-0.767065	5.80899	1.61774
5.80971	-0.768003	5.80982	1.61732
5.81054	-0.767874	5.81065	1.61811
5.81137	-0.76754	5.81149	1.61892
5.81221	-0.768267	5.81232	1.61922
5.81304	-0.767622	5.81315	1.61929
5.81387	-0.76768	5.81398	1.61972
5.8147	-0.767829	5.81482	1.61978
5.81553	-0.766145	5.81565	1.61979
5.81637	-0.76648	5.81648	1.62071
5.8172	-0.766523	5.81731	1.62105
5.81803	-0.766114	5.81814	1.6205
5.81886	-0.765682	5.81898	1.62006
5.81969	-0.766269	5.81981	1.62
5.82053	-0.76641	5.82064	1.61936
5.82136	-0.7651	5.82147	1.61927
5.82219	-0.764117	5.8223	1.61988
5.82302	-0.764388	5.82313	1.62024
5.82385	-0.763535	5.82397	1.62008
5.82469	-0.764721	5.8248	1.6202
5.82552	-0.76531	5.82563	1.62044
5.82635	-0.765811	5.82646	1.6206
5.82718	-0.765984	5.8273	1.62133
5.82801	-0.764964	5.82813	1.62181
5.82885	-0.76517	5.82896	1.62165
5.82968	-0.765198	5.82979	1.62204
5.83051	-0.765463	5.83062	1.62254
5.83134	-0.765228	5.83146	1.6231
5.83217	-0.765431	5.83229	1.62327
5.833	-0.765153	5.83312	1.62352
5.83384	-0.764734	5.83395	1.62406
5.83467	-0.764353	5.83478	1.62397
5.8355	-0.763383	5.83561	1.62404
5.83633	-0.762917	5.83645	1.62391
5.83716	-0.762736	5.83728	1.62403
5.838	-0.763384	5.83811	1.62522
5.83883	-0.764636	5.83894	1.62622
5.83966	-0.764706	5.83978	1.62708
5.84049	-0.764038	5.84061	1.6275
5.84133	-0.763654	5.84144	1.62718
5.84216	-0.764055	5.84227	1.62708
5.84299	-0.764468	5.8431	1.62712
5.84382	-0.764052	5.84394	1.62701
5.84465	-0.763588	5.84477	1.62634
5.84548	-0.763646	5.8456	1.62545
5.84632	-0.763078	5.84643	1.62575
5.84715	-0.761923	5.84726	1.62644
5.84798	-0.761241	5.84809	1.62665
5.84881	-0.7613	5.84893	1.62638
5.84964	-0.760916	5.84976	1.62537
5.85048	-0.760261	5.85059	1.62496
5.85131	-0.759638	5.85142	1.62475
5.85214	-0.759902	5.85226	1.62423
5.85297	-0.760488	5.85309	1.62358
5.8538	-0.761078	5.85392	1.62304
5.85464	-0.761278	5.85475	1.62278
5.85547	-0.761254	5.85558	1.62245
5.8563	-0.760784	5.85642	1.62246
5.85713	-0.760181	5.85725	1.62228
5.85796	-0.759567	5.85808	1.62142
5.8588	-0.759987	5.85891	1.62079
5.85963	-0.760405	5.85974	1.62159
5.86046	-0.759787	5.86058	1.62278
5.86129	-0.758412	5.86141	1.62316
5.86212	-0.758054	5.86224	1.62351
5.86296	-0.758837	5.86307	1.62331
5.86379	-0.759095	5.8639	1.62258
5.86462	-0.758767	5.86474	1.62234
5.86545	-0.759231	5.86557	1.62218
5.86628	-0.759395	5.8664	1.62168
5.86712	-0.759296	5.86723	1.6211
5.86795	-0.759336	5.86806	1.62144
5.86878	-0.759443	5.8689	1.62037
5.86961	-0.759316	5.86973	1.61975
5.87044	-0.758449	5.87056	1.61956
5.87127	-0.757743	5.87139	1.61936
5.87211	-0.757292	5.87222	1.61912
5.87294	-0.757768	5.87306	1.61884
5.87377	-0.758023	5.87389	1.61825
5.8746	-0.758246	5.87472	1.61812
5.87544	-0.758841	5.87555	1.61789
5.87627	-0.759623	5.87638	1.61758
5.8771	-0.760864	5.87722	1.61732
5.87793	-0.761756	5.87805	1.61726
5.87876	-0.762286	5.87888	1.61704
5.8796	-0.762377	5.87971	1.61648
5.88043	-0.762484	5.88054	1.61682
5.88126	-0.762275	5.88138	1.61761
5.88209	-0.761675	5.88221	1.61853
5.88292	-0.761609	5.88304	1.61786
5.88375	-0.761582	5.88387	1.61769
5.88459	-0.762446	5.8847	1.61826
5.88542	-0.763263	5.88554	1.61846
5.88625	-0.763215	5.88637	1.61867
5.88708	-0.762933	5.8872	1.61952
5.88791	-0.762473	5.88803	1.61923
5.88875	-0.762821	5.88887	1.61904
5.88958	-0.763147	5.8897	1.61899
5.89041	-0.76294	5.89053	1.6193
5.89124	-0.763014	5.89136	1.6196
5.89207	-0.762587	5.89219	1.61938
5.89291	-0.762528	5.89302	1.61985
5.89374	-0.762682	5.89386	1.61973
5.89457	-0.761883	5.89469	1.61946
5.8954	-0.761809	5.89552	1.61984
5.89623	-0.761807	5.89635	1.61942
5.89707	-0.762047	5.89718	1.6201
5.8979	-0.763343	5.89802	1.62061
5.89873	-0.763942	5.89885	1.62068
5.89956	-0.764155	5.89968	1.62213
5.90039	-0.764428	5.90051	1.62255
5.90123	-0.76463	5.90135	1.62291
5.90206	-0.76506	5.90218	1.62208
5.90289	-0.765937	5.90301	1.62111
5.90372	-0.765493	5.90384	1.62069
5.90455	-0.764561	5.90467	1.61942
5.90538	-0.764622	5.9055	1.61925
5.90622	-0.764443	5.90634	1.61957
5.90705	-0.763458	5.90717	1.62008
5.90788	-0.763125	5.908	1.6218
5.90871	-0.763793	5.90883	1.62272
5.90954	-0.764102	5.90967	1.62254
5.91038	-0.764011	5.9105	1.62302
5.91121	-0.76469	5.91133	1.62399
5.91204	-0.765517	5.91216	1.6234
5.91287	-0.765367	5.91299	1.62361
5.91371	-0.76564	5.91383	1.62469
5.91454	-0.765653	5.91466	1.62463
5.91537	-0.764237	5.91549	1.62573
5.9162	-0.764894	5.91632	1.62546
5.91703	-0.765141	5.91715	1.62538
5.91786	-0.765073	5.91798	1.62485
5.9187	-0.764642	5.91882	1.62492
5.91953	-0.76395	5.91965	1.62504
5.92036	-0.762953	5.92048	1.62467
5.92119	-0.762483	5.92131	1.62321
5.92202	-0.761805	5.92215	1.62224
5.92286	-0.7621	5.92298	1.62122
5.92369	-0.763369	5.92381	1.621
5.92452	-0.764277	5.92464	1.62176
5.92535	-0.764561	5.92547	1.62164
5.92618	-0.764523	5.92631	1.62061
5.92702	-0.763825	5.92714	1.6209
5.92785	-0.763572	5.92797	1.62133
5.92868	-0.763855	5.9288	1.62085
5.92951	-0.763484	5.92963	1.62075
5.93034	-0.763462	5.93046	1.61991
5.93118	-0.763769	5.9313	1.62023
5.93201	-0.762998	5.93213	1.6203
5.93284	-0.762454	5.93296	1.62037
5.93367	-0.762743	5.93379	1.62041
5.9345	-0.762661	5.93462	1.61943
5.93534	-0.762568	5.93546	1.61942
5.93617	-0.762286	5.93629	1.62096
5.937	-0.761924	5.93712	1.62131
5.93783	-0.761706	5.93795	1.62133
5.93866	-0.761358	5.93879	1.62079
5.9395	-0.761736	5.93962	1.62059
5.94033	-0.762285	5.94045	1.61978
5.94116	-0.761118	5.94128	1.61927
5.94199	-0.760809	5.94211	1.61944
5.94282	-0.760418	5.94294	1.61946
5.94365	-0.759715	5.94378	1.62063
5.94449	-0.759817	5.94461	1.62166
5.94532	-0.760005	5.94544	1.62155
5.94615	-0.759908	5.94627	1.62332
5.94698	-0.760491	5.9471	1.62362
5.94782	-0.76106	5.94794	1.62372
5.94865	-0.76102	5.94877	1.6238
5.94948	-0.761409	5.9496	1.62306
5.95031	-0.762148	5.95043	1.62257
5.95114	-0.76132	5.95127	1.62223
5.95198	-0.760866	5.9521	1.62203
5.95281	-0.761278	5.95293	1.62145
5.95364	-0.760361	5.95376	1.62193
5.95447	-0.759609	5.95459	1.62142
5.9553	-0.759934	5.95543	1.62061
5.95613	-0.760228	5.95626	1.62
5.95697	-0.760369	5.95709	1.61891
5.9578	-0.761771	5.95792	1.6182
5.95863	-0.761349	5.95875	1.61782
5.95946	-0.760461	5.95959	1.6183
5.9603	-0.76074	5.96042	1.61838
5.96113	-0.760894	5.96125	1.61816
5.96196	-0.760777	5.96208	1.61905
5.96279	-0.762136	5.96291	1.62022
5.96362	-0.762439	5.96375	1.62023
5.96446	-0.76203	5.96458	1.61957
5.96529	-0.76154	5.96541	1.61891
5.96612	-0.760782	5.96624	1.61884
5.96695	-0.760506	5.96707	1.61906
5.96778	-0.759677	5.96791	1.61923
5.96861	-0.759705	5.96874	1.61896
5.96945	-0.760058	5.96957	1.61868
5.97028	-0.759476	5.9704	1.61832
5.97111	-0.759971	5.97123	1.61856
5.97194	-0.76052	5.97207	1.61837
5.97277	-0.759567	5.9729	1.61727
5.97361	-0.760411	5.97373	1.6165
5.97444	-0.761383	5.97456	1.61631
5.97527	-0.761254	5.97539	1.61699
5.9761	-0.76154	5.97623	1.61721
5.97693	-0.762398	5.97706	1.61633
5.97777	-0.761474	5.97789	1.6153
5.9786	-0.761658	5.97872	1.61528
5.97943	-0.761718	5.97955	1.61535
5.98026	-0.762272	5.98039	1.61489
5.98109	-0.762195	5.98122	1.61482
5.98193	-0.761723	5.98205	1.61521
5.98276	-0.762081	5.98288	1.61519
5.98359	-0.761534	5.98371	1.61458
5.98442	-0.760795	5.98455	1.61408
5.98525	-0.760315	5.98538	1.61292
5.98609	-0.760242	5.98621	1.61269
5.98692	-0.759373	5.98704	1.61302
5.98775	-0.758802	5.98787	1.61193
5.98858	-0.760095	5.98871	1.61103
5.98941	-0.759938	5.98954	1.61141
5.99024	-0.760148	5.99037	1.6114
5.99108	-0.760892	5.9912	1.61135
5.99191	-0.760755	5.99203	1.61078
5.99274	-0.760572	5.99287	1.61185
5.99357	-0.759924	5.9937	1.61162
5.99441	-0.759867	5.99453	1.61245
5.99524	-0.760935	5.99536	1.61286
5.99607	-0.760611	5.99619	1.61267
5.9969	-0.761472	5.99703	1.61242
5.99773	-0.761691	5.99786	1.61211
5.99857	-0.761196	5.99869	1.61234
5.9994	-0.760706	5.99952	1.61279
6.00023	-0.760534	6.00035	1.61334
6.00106	-0.760729	6.00119	1.61403
6.00189	-0.760247	6.00202	1.61408
6.00272	-0.759462	6.00285	1.61411
6.00356	-0.759039	6.00368	1.61393
6.00439	-0.759429	6.00451	1.61371
6.00522	-0.759763	6.00535	1.61409
6.00605	-0.76112	6.00618	1.61519
6.00688	-0.760943	6.00701	1.61622
6.00772	-0.761613	6.00784	1.61692
6.00855	-0.761601	6.00868	1.6172
6.00938	-0.761511	6.00951	1.61735
6.01021	-0.761127	6.01034	1.61698
6.01104	-0.761042	6.01117	1.61707
6.01188	-0.760818	6.012	1.61627
6.01271	-0.760316	6.01283	1.6161
6.01354	-0.760456	6.01367	1.61657
6.01437	-0.760549	6.0145	1.61524
6.0152	-0.761145	6.01533	1.61597
6.01604	-0.76083	6.01616	1.61683
6.01687	-0.760689	6.01699	1.61755
6.0177	-0.76057	6.01783	1.61711
6.01853	-0.760982	6.01866	1.61675
6.01936	-0.761116	6.01949	1.61763
6.0202	-0.761694	6.02032	1.61787
6.02103	-0.761268	6.02116	1.61762
6.02186	-0.760685	6.02199	1.61759
6.02269	-0.760274	6.02282	1.6185
6.02352	-0.760423	6.02365	1.61889
6.02435	-0.760922	6.02448	1.61938
6.02519	-0.761614	6.02531	1.61924
6.02602	-0.761828	6.02615	1.61946
6.02685	-0.762371	6.02698	1.62026
6.02768	-0.762182	6.02781	1.62074
6.02851	-0.762719	6.02864	1.62055
6.02935	-0.763659	6.02947	1.62107
6.03018	-0.762927	6.03031	1.62046
6.03101	-0.762978	6.03114	1.62099
6.03184	-0.762075	6.03197	1.62089
6.03268	-0.761102	6.0328	1.62021
6.03351	-0.761076	6.03364	1.62028
6.03434	-0.761215	6.03447	1.62123
6.03517	-0.761113	6.0353	1.62047
6.036	-0.760632	6.03613	1.62082
6.03683	-0.760283	6.03696	1.6204
6.03767	-0.760757	6.0378	1.62024
6.0385	-0.760174	6.03863	1.61997
6.03933	-0.76061	6.03946	1.62024
6.04016	-0.760935	6.04029	1.62071
6.04099	-0.76143	6.04112	1.62061
6.04183	-0.761973	6.04195	1.62159
6.04266	-0.7622	6.04279	1.62215
6.04349	-0.76299	6.04362	1.62276
6.04432	-0.762981	6.04445	1.62245
6.04516	-0.763534	6.04528	1.62313
6.04599	-0.762895	6.04612	1.6231
6.04682	-0.762358	6.04695	1.62301
6.04765	-0.761234	6.04778	1.62292
6.04848	-0.760682	6.04861	1.62138
6.04931	-0.760733	6.04944	1.62197
6.05015	-0.761888	6.05028	1.62137
6.05098	-0.762986	6.05111	1.62078
6.05181	-0.763514	6.05194	1.62108
6.05264	-0.763772	6.05277	1.62061
6.05347	-0.763626	6.0536	1.62053
6.05431	-0.763749	6.05444	1.62117
6.05514	-0.764863	6.05527	1.62125
6.05597	-0.76532	6.0561	1.62279
6.0568	-0.764065	6.05693	1.62233
6.05763	-0.764053	6.05776	1.62207
6.05846	-0.764246	6.0586	1.62255
6.0593	-0.764265	6.05943	1.6227
6.06013	-0.764402	6.06026	1.62223
6.06096	-0.765095	6.06109	1.62191
6.06179	-0.764887	6.06192	1.62252
6.06262	-0.765503	6.06276	1.62305
6.06346	-0.766295	6.06359	1.62264
6.06429	-0.767225	6.06442	1.62235
6.06512	-0.767352	6.06525	1.62216
6.06595	-0.767112	6.06608	1.62194
6.06679	-0.768049	6.06692	1.62163
6.06762	-0.768187	6.06775	1.62131
6.06845	-0.768332	6.06858	1.62067
6.06928	-0.768801	6.06941	1.6203
6.07011	-0.76917	6.07024	1.62015
6.07095	-0.769204	6.07108	1.62127
6.07178	-0.769055	6.07191	1.62188
6.07261	-0.768684	6.07274	1.62213
6.07344	-0.769601	6.07357	1.62269
6.07427	-0.770806	6.0744	1.62278
6.0751	-0.770687	6.07524	1.62269
6.07594	-0.770858	6.07607	1.62136
6.07677	-0.771714	6.0769	1.62135
6.0776	-0.77214	6.07773	1.62157
6.07843	-0.771866	6.07856	1.62132
6.07927	-0.772561	6.0794	1.62055
6.0801	-0.773082	6.08023	1.62096
6.08093	-0.773329	6.08106	1.6213
6.08176	-0.773794	6.08189	1.62174
6.08259	-0.773831	6.08272	1.62283
6.08343	-0.773047	6.08356	1.62195
6.08426	-0.772427	6.08439	1.62157
6.08509	-0.771806	6.08522	1.6214
6.08592	-0.771683	6.08605	1.62135
6.08675	-0.771181	6.08688	1.62076
6.08758	-0.770827	6.08772	1.6211
6.08842	-0.77098	6.08855	1.62053
6.08925	-0.7712	6.08938	1.62021
6.09008	-0.770708	6.09021	1.62054
6.09091	-0.769738	6.09104	1.62014
6.09174	-0.768786	6.09188	1.62143
6.09258	-0.768805	6.09271	1.62115
6.09341	-0.768469	6.09354	1.62116
6.09424	-0.768112	6.09437	1.622
6.09507	-0.768306	6.0952	1.62334
6.0959	-0.768377	6.09604	1.62389
6.09674	-0.767984	6.09687	1.62414
6.09757	-0.767536	6.0977	1.62348
6.0984	-0.767459	6.09853	1.62397
6.09923	-0.767079	6.09936	1.62398
6.10006	-0.766584	6.1002	1.62362
6.1009	-0.766512	6.10103	1.62389
6.10173	-0.766275	6.10186	1.62445
6.10256	-0.766203	6.10269	1.62571
6.10339	-0.766182	6.10353	1.62537
6.10422	-0.765963	6.10436	1.62565
6.10506	-0.765656	6.10519	1.62622
6.10589	-0.765128	6.10602	1.62643
6.10672	-0.76496	6.10685	1.62728
6.10755	-0.764666	6.10769	1.62777
6.10838	-0.764129	6.10852	1.62781
6.10921	-0.763835	6.10935	1.62767
6.11005	-0.763414	6.11018	1.62821
6.11088	-0.762933	6.11101	1.62868
6.11171	-0.762173	6.11184	1.62874
6.11254	-0.761578	6.11268	1.62762
6.11337	-0.761846	6.11351	1.62766
6.11421	-0.761932	6.11434	1.62776
6.11504	-0.760891	6.11517	1.62772
6.11587	-0.760239	6.11601	1.62889
6.1167	-0.760285	6.11684	1.62861
6.11754	-0.759854	6.11767	1.62883
6.11837	-0.758911	6.1185	1.62838
6.1192	-0.759095	6.11933	1.62798
6.12003	-0.758843	6.12017	1.62892
6.12086	-0.757956	6.121	1.6307
6.12169	-0.757746	6.12183	1.63117
6.12253	-0.757012	6.12266	1.63102
6.12336	-0.755395	6.12349	1.63041
6.12419	-0.7553	6.12432	1.62992
6.12502	-0.755672	6.12516	1.63106
6.12585	-0.755873	6.12599	1.63017
6.12669	-0.756277	6.12682	1.63058
6.12752	-0.756548	6.12765	1.63171
6.12835	-0.756098	6.12849	1.63224
6.12918	-0.755599	6.12932	1.63293
6.13001	-0.755579	6.13015	1.63325
6.13085	-0.756274	6.13098	1.63227
6.13168	-0.756916	6.13181	1.63311
6.13251	-0.757961	6.13265	1.63343
6.13334	-0.758357	6.13348	1.63376
6.13417	-0.75861	6.13431	1.634
6.13501	-0.759046	6.13514	1.63359
6.13584	-0.759349	6.13597	1.63407
6.13667	-0.759	6.13681	1.63347
6.1375	-0.759294	6.13764	1.63336
6.13833	-0.759053	6.13847	1.63353
6.13917	-0.758745	6.1393	1.63386
6.14	-0.758947	6.14013	1.6347
6.14083	-0.759883	6.14096	1.63481
6.14166	-0.760558	6.1418	1.63522
6.14249	-0.761081	6.14263	1.63596
6.14332	-0.7608	6.14346	1.63593
6.14416	-0.760035	6.14429	1.63487
6.14499	-0.759758	6.14513	1.63472
6.14582	-0.759425	6.14596	1.63461
6.14665	-0.758519	6.14679	1.63462
6.14748	-0.759268	6.14762	1.63485
6.14832	-0.759798	6.14845	1.63418
6.14915	-0.759747	6.14929	1.63376
6.14998	-0.759949	6.15012	1.63477
6.15081	-0.760501	6.15095	1.6353
6.15165	-0.760281	6.15178	1.63517
6.15248	-0.760634	6.15261	1.63552
6.15331	-0.761407	6.15345	1.63569
6.15414	-0.76181	6.15428	1.63629
6.15497	-0.760701	6.15511	1.6367
6.1558	-0.760391	6.15594	1.63683
6.15664	-0.760409	6.15677	1.63671
6.15747	-0.759904	6.15761	1.63661
6.1583	-0.759723	6.15844	1.63702
6.15913	-0.760179	6.15927	1.63744
6.15996	-0.760714	6.1601	1.63802
6.1608	-0.760325	6.16093	1.63864
6.16163	-0.760603	6.16177	1.63827
6.16246	-0.75997	6.1626	1.63749
6.16329	-0.759184	6.16343	1.63688
6.16412	-0.759965	6.16426	1.63712
6.16496	-0.760487	6.16509	1.63723
6.16579	-0.75932	6.16593	1.63666
6.16662	-0.759393	6.16676	1.6369
6.16745	-0.759015	6.16759	1.63796
6.16828	-0.75899	6.16842	1.63753
6.16912	-0.759357	6.16925	1.63669
6.16995	-0.76055	6.17009	1.63633
6.17078	-0.762253	6.17092	1.63621
6.17161	-0.761673	6.17175	1.63695
6.17244	-0.761665	6.17258	1.63741
6.17328	-0.761929	6.17341	1.63701
6.17411	-0.761057	6.17425	1.63688
6.17494	-0.760086	6.17508	1.63661
6.17577	-0.758912	6.17591	1.63715
6.1766	-0.758994	6.17674	1.63766
6.17744	-0.758165	6.17757	1.63751
6.17827	-0.75893	6.17841	1.63737
6.1791	-0.757531	6.17924	1.63706
6.17993	-0.757988	6.18007	1.63661
6.18076	-0.757784	6.1809	1.63668
6.18159	-0.757528	6.18173	1.63694
6.18243	-0.757265	6.18257	1.63716
6.18326	-0.757192	6.1834	1.63706
6.18409	-0.75717	6.18423	1.63684
6.18492	-0.757455	6.18506	1.63719
6.18576	-0.757799	6.18589	1.63787
6.18659	-0.757995	6.18673	1.63785
6.18742	-0.758556	6.18756	1.63769
6.18825	-0.759307	6.18839	1.6378
6.18908	-0.758899	6.18922	1.63813
6.18992	-0.757693	6.19006	1.63832
6.19075	-0.757678	6.19089	1.63818
6.19158	-0.757552	6.19172	1.63792
6.19241	-0.757147	6.19255	1.63817
6.19324	-0.756884	6.19338	1.63847
6.19407	-0.757268	6.19421	1.6389
6.19491	-0.756652	6.19505	1.63857
6.19574	-0.756067	6.19588	1.6383
6.19657	-0.756606	6.19671	1.6381
6.1974	-0.757451	6.19754	1.63793
6.19824	-0.757988	6.19838	1.63804
6.19907	-0.758994	6.19921	1.63798
6.1999	-0.759682	6.20004	1.6382
6.20073	-0.759543	6.20087	1.63829
6.20156	-0.759359	6.2017	1.63845
6.20239	-0.759414	6.20254	1.63818
6.20323	-0.759303	6.20337	1.63796
6.20406	-0.759121	6.2042	1.6384
6.20489	-0.759821	6.20503	1.63868
6.20572	-0.759451	6.20586	1.63897
6.20655	-0.759407	6.20669	1.6394
6.20739	-0.758986	6.20753	1.63976
6.20822	-0.758665	6.20836	1.64011
6.20905	-0.758043	6.20919	1.64058
6.20988	-0.757628	6.21002	1.64053
6.21071	-0.756767	6.21085	1.6407
6.21155	-0.75641	6.21169	1.64126
6.21238	-0.756751	6.21252	1.64146
6.21321	-0.755823	6.21335	1.64199
6.21404	-0.755597	6.21418	1.64255
6.21487	-0.755209	6.21502	1.64203
6.21571	-0.754611	6.21585	1.64141
6.21654	-0.754464	6.21668	1.64162
6.21737	-0.754281	6.21751	1.64156
6.2182	-0.75503	6.21834	1.64121
6.21903	-0.755112	6.21917	1.64128
6.21987	-0.755629	6.22001	1.64157
6.2207	-0.755087	6.22084	1.64185
6.22153	-0.755291	6.22167	1.64203
6.22236	-0.755672	6.2225	1.64104
6.22319	-0.755597	6.22333	1.6404
6.22403	-0.754853	6.22417	1.63993
6.22486	-0.753762	6.225	1.63979
6.22569	-0.752937	6.22583	1.64
6.22652	-0.752565	6.22666	1.63937
6.22735	-0.752563	6.2275	1.63951
6.22818	-0.75232	6.22833	1.64012
6.22902	-0.752158	6.22916	1.63995
6.22985	-0.752552	6.22999	1.63915
6.23068	-0.752375	6.23082	1.63964
6.23151	-0.751558	6.23166	1.64037
6.23234	-0.751818	6.23249	1.64086
6.23318	-0.752527	6.23332	1.64118
6.23401	-0.752814	6.23415	1.64174
6.23484	-0.753447	6.23498	1.64078
6.23567	-0.75428	6.23582	1.64024
6.23651	-0.754846	6.23665	1.6402
6.23734	-0.754736	6.23748	1.64031
6.23817	-0.754642	6.23831	1.64132
6.239	-0.754602	6.23914	1.64101
6.23983	-0.754215	6.23998	1.64179
6.24066	-0.753993	6.24081	1.64157
6.2415	-0.753387	6.24164	1.6416
6.24233	-0.752651	6.24247	1.64283
6.24316	-0.752661	6.2433	1.6427
6.24399	-0.752961	6.24414	1.64305
6.24482	-0.753033	6.24497	1.64359
6.24566	-0.753346	6.2458	1.64311
6.24649	-0.753166	6.24663	1.64237
6.24732	-0.752861	6.24746	1.64234
6.24815	-0.753024	6.2483	1.64267
6.24898	-0.753482	6.24913	1.64221
6.24982	-0.754552	6.24996	1.64183
6.25065	-0.7554	6.25079	1.64105
6.25148	-0.755963	6.25162	1.64078
6.25231	-0.756542	6.25246	1.64024
6.25314	-0.756747	6.25329	1.64055
6.25398	-0.756559	6.25412	1.63964
6.25481	-0.755901	6.25495	1.63891
6.25564	-0.755369	6.25578	1.63942
6.25647	-0.755495	6.25662	1.64053
6.2573	-0.755341	6.25745	1.64092
6.25814	-0.75557	6.25828	1.63936
6.25897	-0.755955	6.25911	1.63903
6.2598	-0.755274	6.25994	1.63858
6.26063	-0.754567	6.26078	1.63932
6.26146	-0.75484	6.26161	1.63967
6.26229	-0.755164	6.26244	1.63999
6.26313	-0.755272	6.26327	1.64027
6.26396	-0.754773	6.2641	1.64077
6.26479	-0.755413	6.26494	1.64068
6.26562	-0.756876	6.26577	1.64041
6.26645	-0.757916	6.2666	1.64029
6.26729	-0.758248	6.26743	1.64041
6.26812	-0.758268	6.26826	1.64106
6.26895	-0.757621	6.2691	1.64131
6.26978	-0.757073	6.26993	1.64133
6.27062	-0.757423	6.27076	1.6417
6.27145	-0.75747	6.27159	1.64233
6.27228	-0.757353	6.27242	1.64258
6.27311	-0.757786	6.27326	1.64229
6.27394	-0.757464	6.27409	1.64205
6.27477	-0.756586	6.27492	1.64185
6.27561	-0.756195	6.27575	1.64149
6.27644	-0.755591	6.27658	1.64175
6.27727	-0.755598	6.27742	1.64229
6.2781	-0.755767	6.27825	1.64312
6.27893	-0.75629	6.27908	1.64384
6.27977	-0.756772	6.27991	1.64397
6.2806	-0.757109	6.28074	1.64412
6.28143	-0.757791	6.28158	1.64412
6.28226	-0.758342	6.28241	1.64305
6.28309	-0.758858	6.28324	1.64388
6.28393	-0.759041	6.28407	1.64421
6.28476	-0.758723	6.2849	1.64331
6.28559	-0.758331	6.28574	1.64324
6.28642	-0.758404	6.28657	1.64353
6.28725	-0.758642	6.2874	1.64316
6.28809	-0.758877	6.28823	1.64323
6.28892	-0.759291	6.28906	1.64415
6.28975	-0.7598	6.2899	1.64437
6.29058	-0.759369	6.29073	1.6446
6.29141	-0.758425	6.29156	1.64432
6.29225	-0.758267	6.29239	1.64387
6.29308	-0.758624	6.29322	1.64429
6.29391	-0.758607	6.29406	1.64501
6.29474	-0.758816	6.29489	1.64535
6.29557	-0.759377	6.29572	1.64526
6.29641	-0.760057	6.29655	1.64537
6.29724	-0.760372	6.29739	1.64582
6.29807	-0.760732	6.29822	1.64628
6.2989	-0.761088	6.29905	1.64627
6.29973	-0.76129	6.29988	1.64605
6.30057	-0.761329	6.30071	1.64689
6.3014	-0.761946	6.30154	1.6478
6.30223	-0.762323	6.30238	1.64789
6.30306	-0.762222	6.30321	1.64842
6.30389	-0.762393	6.30404	1.64894
6.30473	-0.762464	6.30487	1.6494
6.30556	-0.762686	6.3057	1.64995
6.30639	-0.762695	6.30654	1.64983
6.30722	-0.762068	6.30737	1.65002
6.30805	-0.762061	6.3082	1.65085
6.30889	-0.762377	6.30903	1.6516
6.30972	-0.762637	6.30987	1.65122
6.31055	-0.763807	6.3107	1.65108
6.31138	-0.764689	6.31153	1.6514
6.31221	-0.764473	6.31236	1.65167
6.31304	-0.763835	6.31319	1.65195
6.31388	-0.76355	6.31402	1.65247
6.31471	-0.76357	6.31486	1.65254
6.31554	-0.763907	6.31569	1.65243
6.31637	-0.764236	6.31652	1.65236
6.3172	-0.764624	6.31735	1.65244
6.31804	-0.764443	6.31818	1.65248
6.31887	-0.764027	6.31902	1.65221
6.3197	-0.763593	6.31985	1.65245
6.32053	-0.763089	6.32068	1.65258
6.32136	-0.762686	6.32151	1.65229
6.3222	-0.762419	6.32235	1.65187
6.32303	-0.761846	6.32318	1.65142
6.32386	-0.760867	6.32401	1.65165
6.32469	-0.760819	6.32484	1.65238
6.32552	-0.761132	6.32567	1.65222
6.32636	-0.761806	6.32651	1.65208
6.32719	-0.761695	6.32734	1.65196
6.32802	-0.76132	6.32817	1.6513
6.32885	-0.761156	6.329	1.65077
6.32968	-0.761246	6.32983	1.64998
6.33052	-0.760621	6.33067	1.6499
6.33135	-0.760323	6.3315	1.64986
6.33218	-0.760556	6.33233	1.65
6.33301	-0.761039	6.33316	1.65008
6.33384	-0.760986	6.33399	1.65053
6.33468	-0.760801	6.33483	1.65056
6.33551	-0.760974	6.33566	1.65136
6.33634	-0.76056	6.33649	1.65277
6.33717	-0.759955	6.33732	1.65321
6.338	-0.759732	6.33815	1.65364
6.33884	-0.759524	6.33899	1.65401
6.33967	-0.75913	6.33982	1.65354
6.3405	-0.759368	6.34065	1.6531
6.34133	-0.759033	6.34148	1.65333
6.34216	-0.758877	6.34231	1.65364
6.343	-0.759083	6.34315	1.65361
6.34383	-0.759048	6.34398	1.65436
6.34466	-0.758695	6.34481	1.65556
6.34549	-0.758515	6.34564	1.65494
6.34632	-0.75833	6.34647	1.65443
6.34715	-0.757798	6.34731	1.65415
6.34799	-0.756885	6.34814	1.65534
6.34882	-0.757069	6.34897	1.65667
6.34965	-0.756897	6.3498	1.65685
6.35048	-0.757187	6.35063	1.65703
6.35131	-0.756594	6.35147	1.65792
6.35215	-0.755773	6.3523	1.65807
6.35298	-0.755721	6.35313	1.65782
6.35381	-0.755627	6.35396	1.65755
6.35464	-0.755905	6.35479	1.65716
6.35548	-0.756237	6.35563	1.65653
6.35631	-0.756236	6.35646	1.65578
6.35714	-0.755955	6.35729	1.65529
6.35797	-0.756325	6.35812	1.65591
6.3588	-0.756344	6.35895	1.65611
6.35963	-0.756367	6.35979	1.65566
6.36047	-0.755967	6.36062	1.65546
6.3613	-0.755525	6.36145	1.65518
6.36213	-0.754856	6.36228	1.65464
6.36296	-0.755316	6.36311	1.65498
6.36379	-0.755009	6.36395	1.65533
6.36463	-0.75529	6.36478	1.65556
6.36546	-0.755702	6.36561	1.65606
6.36629	-0.755136	6.36644	1.65558
6.36712	-0.754818	6.36727	1.65544
6.36795	-0.753547	6.36811	1.65678
6.36879	-0.753677	6.36894	1.65832
6.36962	-0.753801	6.36977	1.65969
6.37045	-0.753702	6.3706	1.66103
6.37128	-0.753747	6.37143	1.66303
6.37211	-0.754397	6.37227	1.66345
6.37295	-0.753796	6.3731	1.66318
6.37378	-0.754253	6.37393	1.66313
6.37461	-0.753919	6.37476	1.66323
6.37544	-0.752892	6.37559	1.66355
6.37627	-0.752554	6.37643	1.66339
6.37711	-0.75243	6.37726	1.6626
6.37794	-0.752055	6.37809	1.6621
6.37877	-0.75088	6.37892	1.66216
6.3796	-0.750563	6.37976	1.6619
6.38043	-0.750449	6.38059	1.66176
6.38127	-0.750232	6.38142	1.6625
6.3821	-0.750113	6.38225	1.66296
6.38293	-0.750565	6.38308	1.66285
6.38376	-0.75042	6.38392	1.66253
6.38459	-0.749642	6.38475	1.66303
6.38542	-0.749945	6.38558	1.66345
6.38626	-0.749143	6.38641	1.66252
6.38709	-0.748722	6.38724	1.66246
6.38792	-0.749202	6.38807	1.66288
6.38875	-0.749308	6.38891	1.66274
6.38959	-0.749878	6.38974	1.66166
6.39042	-0.749283	6.39057	1.66086
6.39125	-0.749379	6.3914	1.66133
6.39208	-0.748999	6.39224	1.6615
6.39291	-0.749475	6.39307	1.66134
6.39375	-0.749169	6.3939	1.66133
6.39458	-0.748956	6.39473	1.66134
6.39541	-0.749679	6.39556	1.66201
6.39624	-0.748636	6.3964	1.66252
6.39707	-0.748211	6.39723	1.6624
6.3979	-0.746875	6.39806	1.66308
6.39874	-0.747799	6.39889	1.66412
6.39957	-0.746351	6.39972	1.66433
6.4004	-0.746227	6.40055	1.66419
6.40123	-0.745892	6.40139	1.66439
6.40206	-0.74554	6.40222	1.66444
6.4029	-0.746029	6.40305	1.66504
6.40373	-0.74725	6.40388	1.66546
6.40456	-0.747142	6.40472	1.6651
6.40539	-0.746886	6.40555	1.66489
6.40622	-0.746709	6.40638	1.6649
6.40706	-0.746068	6.40721	1.66425
6.40789	-0.746117	6.40804	1.66405
6.40872	-0.746675	6.40888	1.66407
6.40955	-0.747294	6.40971	1.66345
6.41038	-0.746566	6.41054	1.66336
6.41122	-0.74641	6.41137	1.66311
6.41205	-0.746448	6.4122	1.66251
6.41288	-0.745584	6.41303	1.66223
6.41371	-0.744596	6.41387	1.66257
6.41454	-0.744999	6.4147	1.66356
6.41538	-0.743942	6.41553	1.66442
6.41621	-0.744425	6.41636	1.6645
6.41704	-0.746487	6.4172	1.66473
6.41787	-0.746814	6.41803	1.66528
6.4187	-0.747385	6.41886	1.66532
6.41954	-0.748193	6.41969	1.66515
6.42037	-0.748897	6.42052	1.66528
6.4212	-0.749366	6.42136	1.66528
6.42203	-0.749187	6.42219	1.66541
6.42286	-0.748628	6.42302	1.66533
6.4237	-0.748369	6.42385	1.66534
6.42453	-0.74803	6.42468	1.66594
6.42536	-0.747962	6.42552	1.66646
6.42619	-0.747796	6.42635	1.66625
6.42702	-0.747486	6.42718	1.66531
6.42786	-0.748392	6.42801	1.66544
6.42869	-0.749298	6.42884	1.66568
6.42952	-0.749463	6.42968	1.66584
6.43035	-0.74954	6.43051	1.66626
6.43118	-0.749454	6.43134	1.6666
6.43201	-0.749848	6.43217	1.66663
6.43285	-0.749904	6.433	1.66631
6.43368	-0.750271	6.43384	1.66657
6.43451	-0.749476	6.43467	1.66707
6.43534	-0.749719	6.4355	1.66762
6.43618	-0.749602	6.43633	1.6679
6.43701	-0.749249	6.43716	1.66747
6.43784	-0.750122	6.438	1.66738
6.43867	-0.749763	6.43883	1.66747
6.4395	-0.74948	6.43966	1.668
6.44033	-0.749827	6.44049	1.66811
6.44117	-0.750837	6.44132	1.66799
6.442	-0.750806	6.44216	1.66833
6.44283	-0.750437	6.44299	1.66908
6.44366	-0.750051	6.44382	1.66955
6.44449	-0.749264	6.44465	1.66908
6.44533	-0.748442	6.44548	1.66896
6.44616	-0.74869	6.44632	1.66907
6.44699	-0.748999	6.44715	1.66996
6.44782	-0.74946	6.44798	1.67042
6.44865	-0.749078	6.44881	1.67142
6.44949	-0.7482	6.44964	1.67232
6.45032	-0.748218	6.45048	1.67321
6.45115	-0.749089	6.45131	1.67326
6.45198	-0.75035	6.45214	1.67235
6.45281	-0.750807	6.45297	1.67254
6.45365	-0.750448	6.4538	1.67249
6.45448	-0.750824	6.45464	1.67241
6.45531	-0.750988	6.45547	1.67308
6.45614	-0.750839	6.4563	1.67235
6.45697	-0.750949	6.45713	1.67213
6.45781	-0.749959	6.45796	1.67237
6.45864	-0.749221	6.4588	1.67241
6.45947	-0.749293	6.45963	1.67232
6.4603	-0.749605	6.46046	1.672
6.46113	-0.74993	6.46129	1.67227
6.46197	-0.749495	6.46212	1.67212
6.4628	-0.749121	6.46296	1.67243
6.46363	-0.748816	6.46379	1.67206
6.46446	-0.748892	6.46462	1.67134
6.46529	-0.749027	6.46545	1.67129
6.46612	-0.749013	6.46628	1.67116
6.46696	-0.749379	6.46712	1.67075
6.46779	-0.749754	6.46795	1.67084
6.46862	-0.749295	6.46878	1.67169
6.46945	-0.748702	6.46961	1.67202
6.47028	-0.747923	6.47044	1.67244
6.47112	-0.747528	6.47128	1.67293
6.47195	-0.747811	6.47211	1.67292
6.47278	-0.747782	6.47294	1.67275
6.47361	-0.7476	6.47377	1.67241
6.47445	-0.746533	6.47461	1.67262
6.47528	-0.746083	6.47544	1.67271
6.47611	-0.746731	6.47627	1.67252
6.47694	-0.746656	6.4771	1.67211
6.47777	-0.74611	6.47793	1.67256
6.4786	-0.746033	6.47877	1.67258
6.47944	-0.745738	6.4796	1.67319
6.48027	-0.746616	6.48043	1.67405
6.4811	-0.747054	6.48126	1.67352
6.48193	-0.746667	6.48209	1.67339
6.48276	-0.745733	6.48292	1.67338
6.4836	-0.744795	6.48376	1.67379
6.48443	-0.74573	6.48459	1.67313
6.48526	-0.745967	6.48542	1.67356
6.48609	-0.746035	6.48625	1.67341
6.48692	-0.746489	6.48709	1.67411
6.48776	-0.746757	6.48792	1.67404
6.48859	-0.746977	6.48875	1.67405
6.48942	-0.746177	6.48958	1.674
6.49025	-0.74595	6.49041	1.6739
6.49108	-0.746747	6.49125	1.67399
6.49192	-0.74686	6.49208	1.67331
6.49275	-0.746185	6.49291	1.67324
6.49358	-0.745737	6.49374	1.673
6.49441	-0.744798	6.49457	1.673
6.49524	-0.744212	6.4954	1.6729
6.49608	-0.744436	6.49624	1.67245
6.49691	-0.744193	6.49707	1.67132
6.49774	-0.744333	6.4979	1.67115
6.49857	-0.745017	6.49873	1.67173
6.4994	-0.745332	6.49956	1.67259
6.50024	-0.745816	6.5004	1.67302
6.50107	-0.745562	6.50123	1.67359
6.5019	-0.744686	6.50206	1.67467
6.50273	-0.74411	6.50289	1.67499
6.50356	-0.743882	6.50373	1.67521
6.50439	-0.74351	6.50456	1.67558
6.50523	-0.743944	6.50539	1.67644
6.50606	-0.743957	6.50622	1.67691
6.50689	-0.744983	6.50705	1.67747
6.50772	-0.744198	6.50788	1.67765
6.50856	-0.743867	6.50872	1.67927
6.50939	-0.743845	6.50955	1.67944
6.51022	-0.742831	6.51038	1.67944
6.51105	-0.743015	6.51121	1.67908
6.51188	-0.744737	6.51204	1.67881
6.51272	-0.744319	6.51288	1.6786
6.51355	-0.744819	6.51371	1.67894
6.51438	-0.744803	6.51454	1.68005
6.51521	-0.743756	6.51537	1.67948
6.51604	-0.743651	6.51621	1.67919
6.51687	-0.743423	6.51704	1.67918
6.51771	-0.744287	6.51787	1.67909
6.51854	-0.744563	6.5187	1.67943
6.51937	-0.743878	6.51953	1.67974
6.5202	-0.744379	6.52037	1.68008
6.52103	-0.744189	6.5212	1.68045
6.52187	-0.744611	6.52203	1.68104
6.5227	-0.744193	6.52286	1.68108
6.52353	-0.744499	6.52369	1.68168
6.52436	-0.745169	6.52453	1.68177
6.52519	-0.745145	6.52536	1.6817
6.52603	-0.745611	6.52619	1.68141
6.52686	-0.745236	6.52702	1.68111
6.52769	-0.745761	6.52785	1.68175
6.52852	-0.745363	6.52869	1.68184
6.52935	-0.744899	6.52952	1.68247
6.53019	-0.744962	6.53035	1.68234
6.53102	-0.745106	6.53118	1.68309
6.53185	-0.744916	6.53201	1.68272
6.53268	-0.744002	6.53285	1.6825
6.53351	-0.743441	6.53368	1.68332
6.53435	-0.74356	6.53451	1.68416
6.53518	-0.743648	6.53534	1.6847
6.53601	-0.742737	6.53617	1.68531
6.53684	-0.742756	6.53701	1.68602
6.53767	-0.742259	6.53784	1.68663
6.53851	-0.743074	6.53867	1.68722
6.53934	-0.743421	6.5395	1.6872
6.54017	-0.742062	6.54033	1.68617
6.541	-0.742053	6.54117	1.68535
6.54183	-0.741026	6.542	1.68504
6.54267	-0.741573	6.54283	1.68502
6.5435	-0.742149	6.54366	1.68493
6.54433	-0.741167	6.54449	1.6848
6.54516	-0.740711	6.54533	1.68499
6.54599	-0.741281	6.54616	1.68493
6.54683	-0.741938	6.54699	1.68487
6.54766	-0.74264	6.54782	1.68472
6.54849	-0.742695	6.54865	1.68365
6.54932	-0.742819	6.54949	1.68272
6.55015	-0.743573	6.55032	1.6823
6.55098	-0.744057	6.55115	1.68243
6.55182	-0.745113	6.55198	1.68255
6.55265	-0.74458	6.55281	1.68247
6.55348	-0.743649	6.55365	1.6818
6.55431	-0.743359	6.55448	1.682
6.55515	-0.743492	6.55531	1.68169
6.55598	-0.74267	6.55614	1.68159
6.55681	-0.742888	6.55697	1.68232
6.55764	-0.742371	6.55781	1.68253
6.55847	-0.742388	6.55864	1.68194
6.5593	-0.740714	6.55947	1.68203
6.56014	-0.740374	6.5603	1.68182
6.56097	-0.740033	6.56113	1.6812
6.5618	-0.74003	6.56197	1.68061
6.56263	-0.740401	6.5628	1.67993
6.56346	-0.739597	6.56363	1.67974
6.5643	-0.739656	6.56446	1.68011
6.56513	-0.739461	6.56529	1.67978
6.56596	-0.738549	6.56613	1.67912
6.56679	-0.739538	6.56696	1.67889
6.56762	-0.73891	6.56779	1.67845
6.56846	-0.739349	6.56862	1.67821
6.56929	-0.739191	6.56945	1.67836
6.57012	-0.739444	6.57029	1.67808
6.57095	-0.739826	6.57112	1.67778
6.57178	-0.738939	6.57195	1.67744
6.57262	-0.738328	6.57278	1.67718
6.57345	-0.738698	6.57362	1.67643
6.57428	-0.739538	6.57445	1.67674
6.57511	-0.740293	6.57528	1.67742
6.57594	-0.739923	6.57611	1.67687
6.57678	-0.739845	6.57694	1.67558
6.57761	-0.7403	6.57777	1.67601
6.57844	-0.740453	6.57861	1.67547
6.57927	-0.741197	6.57944	1.67488
6.5801	-0.739797	6.58027	1.67427
6.58094	-0.738972	6.5811	1.67422
6.58177	-0.739618	6.58193	1.67468
6.5826	-0.738342	6.58277	1.67589
6.58343	-0.738857	6.5836	1.67593
6.58426	-0.738097	6.58443	1.67565
6.58509	-0.737135	6.58526	1.67605
6.58593	-0.738539	6.5861	1.67628
6.58676	-0.737734	6.58693	1.67599
6.58759	-0.737704	6.58776	1.67695
6.58842	-0.736682	6.58859	1.67666
6.58925	-0.735448	6.58942	1.67606
6.59009	-0.735544	6.59025	1.67574
6.59092	-0.735272	6.59109	1.67596
6.59175	-0.734954	6.59192	1.6765
6.59258	-0.735245	6.59275	1.67636
6.59342	-0.735519	6.59358	1.67645
6.59425	-0.734483	6.59441	1.67669
6.59508	-0.733988	6.59525	1.67692
6.59591	-0.733693	6.59608	1.67698
6.59674	-0.732792	6.59691	1.67672
6.59757	-0.733209	6.59774	1.67666
6.59841	-0.733022	6.59858	1.6764
6.59924	-0.733832	6.59941	1.67645
6.60007	-0.733741	6.60024	1.67671
6.6009	-0.734599	6.60107	1.67673
6.60173	-0.734445	6.6019	1.67654
6.60257	-0.7342	6.60274	1.67676
6.6034	-0.734287	6.60357	1.67686
6.60423	-0.734724	6.6044	1.67719
6.60506	-0.735776	6.60523	1.67734
6.60589	-0.735341	6.60606	1.67664
6.60673	-0.735467	6.60689	1.67592
6.60756	-0.735333	6.60773	1.67634
6.60839	-0.734233	6.60856	1.67634
6.60922	-0.734365	6.60939	1.67547
6.61005	-0.733863	6.61022	1.67596
6.61089	-0.733602	6.61106	1.67642
6.61172	-0.732251	6.61189	1.67615
6.61255	-0.73182	6.61272	1.67585
6.61338	-0.732335	6.61355	1.67557
6.61421	-0.732667	6.61438	1.67557
6.61505	-0.732386	6.61522	1.67564
6.61588	-0.732255	6.61605	1.67546
6.61671	-0.731543	6.61688	1.67526
6.61754	-0.7316	6.61771	1.67504
6.61837	-0.732126	6.61854	1.67534
6.61921	-0.731878	6.61938	1.67533
6.62004	-0.731634	6.62021	1.67501
6.62087	-0.731229	6.62104	1.67514
6.6217	-0.73173	6.62187	1.67507
6.62253	-0.732127	6.6227	1.67488
6.62336	-0.732356	6.62354	1.67416
6.6242	-0.733301	6.62437	1.67323
6.62503	-0.733102	6.6252	1.67335
6.62586	-0.732811	6.62603	1.67412
6.62669	-0.73282	6.62686	1.67326
6.62753	-0.732299	6.6277	1.67255
6.62836	-0.732584	6.62853	1.67282
6.62919	-0.732286	6.62936	1.67234
6.63002	-0.732006	6.63019	1.67234
6.63085	-0.732086	6.63102	1.67297
6.63169	-0.731067	6.63186	1.67319
6.63252	-0.730832	6.63269	1.67353
6.63335	-0.730474	6.63352	1.6738
6.63418	-0.729054	6.63435	1.67423
6.63501	-0.728484	6.63518	1.67432
6.63584	-0.729152	6.63602	1.67436
6.63668	-0.729261	6.63685	1.67504
6.63751	-0.729854	6.63768	1.67582
6.63834	-0.730251	6.63851	1.6759
6.63917	-0.730429	6.63934	1.67593
6.64	-0.730168	6.64018	1.67675
6.64084	-0.729569	6.64101	1.67594
6.64167	-0.728833	6.64184	1.67528
6.6425	-0.729371	6.64267	1.67489
6.64333	-0.729071	6.6435	1.6757
6.64416	-0.728186	6.64434	1.67593
6.645	-0.727062	6.64517	1.67587
6.64583	-0.725538	6.646	1.67588
6.64666	-0.724915	6.64683	1.67614
6.64749	-0.724245	6.64766	1.67663
6.64832	-0.724192	6.6485	1.67714
6.64916	-0.723535	6.64933	1.67724
6.64999	-0.722518	6.65016	1.67801
6.65082	-0.722733	6.65099	1.67945
6.65165	-0.723002	6.65182	1.67956
6.65248	-0.722851	6.65266	1.67927
6.65332	-0.723614	6.65349	1.67986
6.65415	-0.723714	6.65432	1.68045
6.65498	-0.723373	6.65515	1.68096
6.65581	-0.723343	6.65598	1.68118
6.65664	-0.723315	6.65682	1.68076
6.65747	-0.723086	6.65765	1.68027
6.65831	-0.723678	6.65848	1.67986
6.65914	-0.723594	6.65931	1.67952
6.65997	-0.722837	6.66014	1.67964
6.6608	-0.722319	6.66098	1.68002
[truncated: 20,329 more rows]
