# Supplementary material for: The neuronal calcium sensor NCS-1 regulates the phosphorylation state and activity of the Gα chaperone and GEF Ric-8A
Source: eLife journal article supplement (doi:10.7554/elife.86151), 2023-11-27
Supplement: supp [file Fig4E-Figs4Suppl2BandC-Bli-SourceData.xlsx]

## Sheet: Fig4E
		0 nM		250 nM		375 nM		425 nM
1	0	0.001	0	0.006	0	0.014	0	0
2	0.2	0.002	0.2	0.006	0.2	0.013	0.2	0.001
3	0.4	0.003	0.4	0.007	0.4	0.012	0.4	0.002
4	0.6	0.003	0.6	0.007	0.6	0.011	0.6	0.003
5	0.8	0.004	0.8	0.008	0.8	0.011	0.8	0.004
6	1	0.004	1	0.009	1	0.01	1	0.005
7	1.2	0.005	1.2	0.009	1.2	0.01	1.2	0.006
8	1.4	0.005	1.4	0.009	1.4	0.009	1.4	0.006
9	1.6	0.006	1.6	0.01	1.6	0.009	1.6	0.006
10	1.8	0.006	1.8	0.01	1.8	0.009	1.8	0.006
11	2	0.006	2	0.01	2	0.009	2	0.007
12	2.2	0.006	2.2	0.01	2.2	0.009	2.2	0.006
13	2.4	0.006	2.4	0.011	2.4	0.01	2.4	0.006
14	2.6	0.006	2.6	0.011	2.6	0.01	2.6	0.006
15	2.8	0.007	2.8	0.011	2.8	0.01	2.8	0.006
16	3	0.007	3	0.012	3	0.01	3	0.006
17	3.2	0.007	3.2	0.012	3.2	0.01	3.2	0.006
18	3.4	0.007	3.4	0.012	3.4	0.01	3.4	0.006
19	3.6	0.007	3.6	0.011	3.6	0.01	3.6	0.006
20	3.8	0.007	3.8	0.011	3.8	0.01	3.8	0.006
21	4	0.006	4	0.011	4	0.01	4	0.006
22	4.2	0.006	4.2	0.011	4.2	0.01	4.2	0.006
23	4.4	0.006	4.4	0.01	4.4	0.01	4.4	0.006
24	4.6	0.006	4.6	0.01	4.6	0.01	4.6	0.006
25	4.8	0.005	4.8	0.01	4.8	0.01	4.8	0.006
26	5	0.005	5	0.01	5	0.01	5	0.006
27	5.2	0.005	5.2	0.01	5.2	0.01	5.2	0.006
28	5.4	0.005	5.4	0.009	5.4	0.01	5.4	0.005
29	5.6	0.005	5.6	0.009	5.6	0.01	5.6	0.005
30	5.8	0.005	5.8	0.009	5.8	0.011	5.8	0.005
31	6	0.005	6	0.009	6	0.011	6	0.005
32	6.2	0.006	6.2	0.009	6.2	0.011	6.2	0.005
33	6.4	0.006	6.4	0.008	6.4	0.011	6.4	0.005
34	6.6	0.006	6.6	0.008	6.6	0.011	6.6	0.005
35	6.8	0.005	6.8	0.008	6.8	0.011	6.8	0.005
36	7	0.006	7	0.008	7	0.01	7	0.005
37	7.2	0.006	7.2	0.007	7.2	0.01	7.2	0.005
38	7.4	0.006	7.4	0.007	7.4	0.01	7.4	0.005
39	7.6	0.006	7.6	0.007	7.6	0.009	7.6	0.005
40	7.8	0.006	7.8	0.007	7.8	0.009	7.8	0.006
41	8	0.005	8	0.007	8	0.009	8	0.006
42	8.2	0.005	8.2	0.007	8.2	0.008	8.2	0.006
43	8.4	0.005	8.4	0.007	8.4	0.008	8.4	0.006
44	8.6	0.005	8.6	0.008	8.6	0.008	8.6	0.007
45	8.8	0.005	8.8	0.008	8.8	0.008	8.8	0.006
46	9	0.005	9	0.008	9	0.008	9	0.006
47	9.2	0.006	9.2	0.008	9.2	0.008	9.2	0.006
48	9.4	0.006	9.4	0.008	9.4	0.008	9.4	0.005
49	9.6	0.006	9.6	0.008	9.6	0.008	9.6	0.005
50	9.8	0.006	9.8	0.008	9.8	0.008	9.8	0.005
51	10	0.006	10	0.008	10	0.008	10	0.004
52	10.2	0.006	10.2	0.008	10.2	0.008	10.2	0.004
53	10.4	0.006	10.4	0.008	10.4	0.009	10.4	0.004
54	10.6	0.006	10.6	0.008	10.6	0.009	10.6	0.004
55	10.8	0.005	10.8	0.007	10.8	0.009	10.8	0.003
56	11	0.005	11	0.007	11	0.009	11	0.003
57	11.2	0.005	11.2	0.007	11.2	0.009	11.2	0.003
58	11.4	0.005	11.4	0.007	11.4	0.009	11.4	0.003
59	11.6	0.004	11.6	0.006	11.6	0.009	11.6	0.003
60	11.8	0.004	11.8	0.006	11.8	0.009	11.8	0.004
61	12	0.005	12	0.006	12	0.009	12	0.004
62	12.2	0.005	12.2	0.007	12.2	0.009	12.2	0.004
63	12.4	0.005	12.4	0.007	12.4	0.008	12.4	0.004
64	12.6	0.005	12.6	0.008	12.6	0.008	12.6	0.004
65	12.8	0.005	12.8	0.008	12.8	0.008	12.8	0.004
66	13	0.006	13	0.008	13	0.007	13	0.004
67	13.2	0.006	13.2	0.008	13.2	0.006	13.2	0.005
68	13.4	0.006	13.4	0.008	13.4	0.006	13.4	0.005
69	13.6	0.006	13.6	0.008	13.6	0.006	13.6	0.005
70	13.8	0.006	13.8	0.007	13.8	0.005	13.8	0.005
71	14	0.006	14	0.007	14	0.005	14	0.006
72	14.2	0.006	14.2	0.006	14.2	0.005	14.2	0.006
73	14.4	0.006	14.4	0.006	14.4	0.005	14.4	0.006
74	14.6	0.005	14.6	0.006	14.6	0.005	14.6	0.006
75	14.8	0.005	14.8	0.006	14.8	0.005	14.8	0.006
76	15	0.004	15	0.006	15	0.005	15	0.005
77	15.2	0.004	15.2	0.005	15.2	0.004	15.2	0.006
78	15.4	0.004	15.4	0.005	15.4	0.004	15.4	0.006
79	15.6	0.004	15.6	0.005	15.6	0.004	15.6	0.006
80	15.8	0.003	15.8	0.005	15.8	0.004	15.8	0.006
81	16	0.003	16	0.005	16	0.004	16	0.006
82	16.2	0.003	16.2	0.006	16.2	0.004	16.2	0.005
83	16.4	0.003	16.4	0.006	16.4	0.005	16.4	0.005
84	16.6	0.003	16.6	0.006	16.6	0.005	16.6	0.005
85	16.8	0.004	16.8	0.005	16.8	0.005	16.8	0.004
86	17	0.004	17	0.005	17	0.005	17	0.004
87	17.2	0.004	17.2	0.005	17.2	0.005	17.2	0.004
88	17.4	0.004	17.4	0.005	17.4	0.005	17.4	0.004
89	17.6	0.004	17.6	0.005	17.6	0.005	17.6	0.004
90	17.8	0.005	17.8	0.005	17.8	0.005	17.8	0.004
91	18	0.005	18	0.005	18	0.005	18	0.004
92	18.2	0.005	18.2	0.005	18.2	0.005	18.2	0.004
93	18.4	0.004	18.4	0.005	18.4	0.005	18.4	0.003
94	18.6	0.004	18.6	0.004	18.6	0.005	18.6	0.003
95	18.8	0.004	18.8	0.004	18.8	0.004	18.8	0.003
96	19	0.003	19	0.004	19	0.004	19	0.003
97	19.2	0.003	19.2	0.004	19.2	0.004	19.2	0.003
98	19.4	0.003	19.4	0.004	19.4	0.004	19.4	0.003
99	19.6	0.003	19.6	0.004	19.6	0.004	19.6	0.004
100	19.8	0.003	19.8	0.004	19.8	0.005	19.8	0.004
101	20	0.002	20	0.004	20	0.004	20	0.004
102	20.2	0.002	20.2	0.004	20.2	0.005	20.2	0.004
103	20.4	0.002	20.4	0.004	20.4	0.005	20.4	0.004
104	20.6	0.002	20.6	0.004	20.6	0.005	20.6	0.004
105	20.8	0.002	20.8	0.005	20.8	0.005	20.8	0.004
106	21	0.002	21	0.005	21	0.006	21	0.004
107	21.2	0.002	21.2	0.005	21.2	0.006	21.2	0.004
108	21.4	0.001	21.4	0.006	21.4	0.006	21.4	0.005
109	21.6	0.002	21.6	0.006	21.6	0.005	21.6	0.005
110	21.8	0.002	21.8	0.006	21.8	0.005	21.8	0.005
111	22	0.002	22	0.007	22	0.005	22	0.005
112	22.2	0.002	22.2	0.006	22.2	0.004	22.2	0.004
113	22.4	0.002	22.4	0.006	22.4	0.004	22.4	0.004
114	22.6	0.002	22.6	0.006	22.6	0.004	22.6	0.004
115	22.8	0.002	22.8	0.006	22.8	0.003	22.8	0.004
116	23	0.002	23	0.005	23	0.003	23	0.004
117	23.2	0.002	23.2	0.005	23.2	0.003	23.2	0.003
118	23.4	0.002	23.4	0.004	23.4	0.003	23.4	0.003
119	23.6	0.002	23.6	0.004	23.6	0.003	23.6	0.003
120	23.8	0.002	23.8	0.004	23.8	0.003	23.8	0.003
121	24	0.002	24	0.003	24	0.002	24	0.003
122	24.2	0.002	24.2	0.003	24.2	0.002	24.2	0.003
123	24.4	0.002	24.4	0.003	24.4	0.002	24.4	0.003
124	24.6	0.002	24.6	0.002	24.6	0.002	24.6	0.002
125	24.8	0.002	24.8	0.002	24.8	0.001	24.8	0.002
126	25	0.002	25	0.002	25	0.001	25	0.002
127	25.2	0.002	25.2	0.002	25.2	0.001	25.2	0.001
128	25.4	0.002	25.4	0.002	25.4	0.001	25.4	0.001
129	25.6	0.002	25.6	0.003	25.6	0.001	25.6	0.001
130	25.8	0.002	25.8	0.003	25.8	0.001	25.8	0.001
131	26	0.002	26	0.003	26	0.001	26	0.001
132	26.2	0.001	26.2	0.003	26.2	0.001	26.2	0.001
133	26.4	0.001	26.4	0.003	26.4	0	26.4	0.001
134	26.6	0.001	26.6	0.003	26.6	0	26.6	0.001
135	26.8	0.001	26.8	0.002	26.8	0	26.8	0.001
136	27	0.001	27	0.001	27	0	27	0.001
137	27.2	0.001	27.2	0.001	27.2	0	27.2	0
138	27.4	0.001	27.4	0.001	27.4	0.001	27.4	0.001
139	27.6	0.001	27.6	0	27.6	0.001	27.6	0.001
140	27.8	0.001	27.8	0	27.8	0	27.8	0.001
141	28	0.001	28	0	28	0	28	0
142	28.2	0.001	28.2	0	28.2	0	28.2	0.001
143	28.4	0	28.4	-0.001	28.4	0	28.4	0.001
144	28.6	0	28.6	-0.001	28.6	0	28.6	0.001
145	28.8	0	28.8	-0.001	28.8	0	28.8	0
146	29	-0.001	29	-0.001	29	0	29	0.001
147	29.2	-0.001	29.2	0	29.2	0	29.2	0.001
148	29.4	-0.002	29.4	0	29.4	0	29.4	0.001
149	29.6	-0.002	29.6	0	29.6	0	29.6	0.001
150	29.8	-0.002	29.8	0	29.8	-0.001	29.8	0.001
151	30	0	30	0	30	0	30	0
152	30.2	0.008	30.2	0.012	30.2	0.013	30.2	0.001
153	30.4	0.017	30.4	0.025	30.4	0.026	30.4	0.001
154	30.6	0.026	30.6	0.039	30.6	0.039	30.6	0.001
155	30.8	0.035	30.8	0.052	30.8	0.053	30.8	0.001
156	31	0.044	31	0.065	31	0.065	31	0.001
157	31.2	0.052	31.2	0.077	31.2	0.076	31.2	0
158	31.4	0.06	31.4	0.088	31.4	0.086	31.4	0.005
159	31.6	0.067	31.6	0.097	31.6	0.094	31.6	0.01
160	31.8	0.073	31.8	0.104	31.8	0.1	31.8	0.014
161	32	0.077	32	0.108	32	0.103	32	0.016
162	32.2	0.08	32.2	0.109	32.2	0.102	32.2	0.017
163	32.4	0.084	32.4	0.111	32.4	0.104	32.4	0.019
164	32.6	0.088	32.6	0.113	32.6	0.105	32.6	0.02
165	32.8	0.092	32.8	0.115	32.8	0.105	32.8	0.023
166	33	0.095	33	0.117	33	0.106	33	0.025
167	33.2	0.099	33.2	0.119	33.2	0.107	33.2	0.027
168	33.4	0.103	33.4	0.121	33.4	0.107	33.4	0.029
169	33.6	0.107	33.6	0.124	33.6	0.108	33.6	0.032
170	33.8	0.111	33.8	0.126	33.8	0.109	33.8	0.034
171	34	0.115	34	0.128	34	0.11	34	0.037
172	34.2	0.119	34.2	0.13	34.2	0.111	34.2	0.039
173	34.4	0.122	34.4	0.132	34.4	0.111	34.4	0.041
174	34.6	0.125	34.6	0.134	34.6	0.112	34.6	0.044
175	34.8	0.128	34.8	0.136	34.8	0.112	34.8	0.046
176	35	0.131	35	0.139	35	0.113	35	0.049
177	35.2	0.133	35.2	0.14	35.2	0.114	35.2	0.051
178	35.4	0.135	35.4	0.142	35.4	0.115	35.4	0.053
179	35.6	0.137	35.6	0.144	35.6	0.116	35.6	0.055
180	35.8	0.14	35.8	0.146	35.8	0.117	35.8	0.057
181	36	0.142	36	0.148	36	0.118	36	0.059
182	36.2	0.145	36.2	0.15	36.2	0.119	36.2	0.061
183	36.4	0.147	36.4	0.153	36.4	0.12	36.4	0.063
184	36.6	0.149	36.6	0.155	36.6	0.122	36.6	0.065
185	36.8	0.151	36.8	0.156	36.8	0.123	36.8	0.066
186	37	0.153	37	0.158	37	0.124	37	0.068
187	37.2	0.155	37.2	0.16	37.2	0.126	37.2	0.07
188	37.4	0.158	37.4	0.162	37.4	0.127	37.4	0.071
189	37.6	0.16	37.6	0.163	37.6	0.129	37.6	0.072
190	37.8	0.162	37.8	0.165	37.8	0.13	37.8	0.074
191	38	0.164	38	0.167	38	0.131	38	0.075
192	38.2	0.167	38.2	0.168	38.2	0.132	38.2	0.077
193	38.4	0.169	38.4	0.17	38.4	0.133	38.4	0.078
194	38.6	0.171	38.6	0.171	38.6	0.133	38.6	0.08
195	38.8	0.172	38.8	0.172	38.8	0.134	38.8	0.081
196	39	0.174	39	0.173	39	0.134	39	0.082
197	39.2	0.176	39.2	0.174	39.2	0.135	39.2	0.083
198	39.4	0.178	39.4	0.176	39.4	0.135	39.4	0.085
199	39.6	0.179	39.6	0.178	39.6	0.135	39.6	0.086
200	39.8	0.181	39.8	0.179	39.8	0.136	39.8	0.087
201	40	0.183	40	0.181	40	0.136	40	0.089
202	40.2	0.185	40.2	0.182	40.2	0.137	40.2	0.09
203	40.4	0.186	40.4	0.183	40.4	0.138	40.4	0.092
204	40.6	0.188	40.6	0.185	40.6	0.139	40.6	0.094
205	40.8	0.19	40.8	0.186	40.8	0.14	40.8	0.095
206	41	0.191	41	0.187	41	0.141	41	0.096
207	41.2	0.193	41.2	0.188	41.2	0.142	41.2	0.098
208	41.4	0.194	41.4	0.189	41.4	0.143	41.4	0.099
209	41.6	0.196	41.6	0.191	41.6	0.145	41.6	0.1
210	41.8	0.198	41.8	0.192	41.8	0.146	41.8	0.102
211	42	0.199	42	0.193	42	0.148	42	0.103
212	42.2	0.201	42.2	0.194	42.2	0.149	42.2	0.104
213	42.4	0.202	42.4	0.195	42.4	0.15	42.4	0.105
214	42.6	0.204	42.6	0.196	42.6	0.151	42.6	0.106
215	42.8	0.205	42.8	0.196	42.8	0.151	42.8	0.107
216	43	0.207	43	0.197	43	0.152	43	0.108
217	43.2	0.208	43.2	0.198	43.2	0.152	43.2	0.109
218	43.4	0.21	43.4	0.199	43.4	0.153	43.4	0.11
219	43.6	0.211	43.6	0.2	43.6	0.153	43.6	0.111
220	43.8	0.212	43.8	0.201	43.8	0.153	43.8	0.112
221	44	0.213	44	0.201	44	0.153	44	0.113
222	44.2	0.214	44.2	0.202	44.2	0.153	44.2	0.114
223	44.4	0.215	44.4	0.203	44.4	0.154	44.4	0.115
224	44.6	0.216	44.6	0.204	44.6	0.154	44.6	0.115
225	44.8	0.217	44.8	0.205	44.8	0.154	44.8	0.116
226	45	0.218	45	0.206	45	0.155	45	0.117
227	45.2	0.219	45.2	0.207	45.2	0.155	45.2	0.118
228	45.4	0.219	45.4	0.208	45.4	0.156	45.4	0.119
229	45.6	0.22	45.6	0.209	45.6	0.157	45.6	0.121
230	45.8	0.221	45.8	0.21	45.8	0.158	45.8	0.122
231	46	0.222	46	0.211	46	0.16	46	0.123
232	46.2	0.223	46.2	0.212	46.2	0.161	46.2	0.124
233	46.4	0.225	46.4	0.212	46.4	0.162	46.4	0.125
234	46.6	0.226	46.6	0.213	46.6	0.163	46.6	0.126
235	46.8	0.227	46.8	0.214	46.8	0.163	46.8	0.127
236	47	0.228	47	0.215	47	0.164	47	0.128
237	47.2	0.23	47.2	0.217	47.2	0.165	47.2	0.129
238	47.4	0.231	47.4	0.218	47.4	0.165	47.4	0.131
239	47.6	0.232	47.6	0.22	47.6	0.166	47.6	0.132
240	47.8	0.233	47.8	0.222	47.8	0.167	47.8	0.133
241	48	0.234	48	0.223	48	0.167	48	0.134
242	48.2	0.235	48.2	0.224	48.2	0.168	48.2	0.134
243	48.4	0.236	48.4	0.225	48.4	0.168	48.4	0.135
244	48.6	0.238	48.6	0.226	48.6	0.168	48.6	0.135
245	48.8	0.239	48.8	0.227	48.8	0.169	48.8	0.136
246	49	0.24	49	0.229	49	0.169	49	0.137
247	49.2	0.241	49.2	0.23	49.2	0.169	49.2	0.137
248	49.4	0.242	49.4	0.231	49.4	0.169	49.4	0.138
249	49.6	0.242	49.6	0.231	49.6	0.17	49.6	0.138
250	49.8	0.243	49.8	0.232	49.8	0.17	49.8	0.139
251	50	0.243	50	0.232	50	0.171	50	0.139
252	50.2	0.244	50.2	0.232	50.2	0.171	50.2	0.14
253	50.4	0.245	50.4	0.232	50.4	0.171	50.4	0.14
254	50.6	0.245	50.6	0.233	50.6	0.172	50.6	0.141
255	50.8	0.246	50.8	0.234	50.8	0.172	50.8	0.142
256	51	0.247	51	0.235	51	0.173	51	0.143
257	51.2	0.247	51.2	0.236	51.2	0.174	51.2	0.144
258	51.4	0.248	51.4	0.238	51.4	0.174	51.4	0.145
259	51.6	0.249	51.6	0.239	51.6	0.175	51.6	0.146
260	51.8	0.25	51.8	0.241	51.8	0.176	51.8	0.147
261	52	0.252	52	0.242	52	0.177	52	0.148
262	52.2	0.253	52.2	0.243	52.2	0.177	52.2	0.149
263	52.4	0.254	52.4	0.244	52.4	0.178	52.4	0.15
264	52.6	0.255	52.6	0.245	52.6	0.178	52.6	0.151
265	52.8	0.256	52.8	0.247	52.8	0.179	52.8	0.152
266	53	0.256	53	0.248	53	0.18	53	0.152
267	53.2	0.256	53.2	0.249	53.2	0.18	53.2	0.153
268	53.4	0.257	53.4	0.25	53.4	0.181	53.4	0.154
269	53.6	0.257	53.6	0.25	53.6	0.182	53.6	0.155
270	53.8	0.257	53.8	0.25	53.8	0.182	53.8	0.155
271	54	0.258	54	0.25	54	0.183	54	0.156
272	54.2	0.258	54.2	0.25	54.2	0.183	54.2	0.157
273	54.4	0.259	54.4	0.25	54.4	0.184	54.4	0.158
274	54.6	0.259	54.6	0.25	54.6	0.184	54.6	0.158
275	54.8	0.26	54.8	0.25	54.8	0.185	54.8	0.159
276	55	0.26	55	0.25	55	0.186	55	0.159
277	55.2	0.261	55.2	0.251	55.2	0.187	55.2	0.159
278	55.4	0.261	55.4	0.252	55.4	0.187	55.4	0.16
279	55.6	0.262	55.6	0.253	55.6	0.188	55.6	0.16
280	55.8	0.263	55.8	0.254	55.8	0.188	55.8	0.16
281	56	0.263	56	0.255	56	0.188	56	0.161
282	56.2	0.264	56.2	0.256	56.2	0.188	56.2	0.161
283	56.4	0.264	56.4	0.257	56.4	0.188	56.4	0.162
284	56.6	0.265	56.6	0.258	56.6	0.188	56.6	0.162
285	56.8	0.265	56.8	0.258	56.8	0.189	56.8	0.163
286	57	0.265	57	0.259	57	0.189	57	0.163
287	57.2	0.266	57.2	0.259	57.2	0.189	57.2	0.164
288	57.4	0.266	57.4	0.259	57.4	0.189	57.4	0.165
289	57.6	0.267	57.6	0.259	57.6	0.189	57.6	0.166
290	57.8	0.267	57.8	0.259	57.8	0.189	57.8	0.167
291	58	0.268	58	0.259	58	0.189	58	0.167
292	58.2	0.268	58.2	0.26	58.2	0.189	58.2	0.168
293	58.4	0.268	58.4	0.26	58.4	0.189	58.4	0.168
294	58.6	0.268	58.6	0.26	58.6	0.19	58.6	0.168
295	58.8	0.269	58.8	0.261	58.8	0.19	58.8	0.169
296	59	0.269	59	0.261	59	0.191	59	0.169
297	59.2	0.27	59.2	0.262	59.2	0.191	59.2	0.169
298	59.4	0.27	59.4	0.262	59.4	0.192	59.4	0.17
299	59.6	0.271	59.6	0.263	59.6	0.192	59.6	0.17
300	59.8	0.272	59.8	0.263	59.8	0.192	59.8	0.17
301	60	0.273	60	0.263	60	0.193	60	0.171
302	60.2	0.273	60.2	0.264	60.2	0.193	60.2	0.171
303	60.4	0.274	60.4	0.265	60.4	0.193	60.4	0.172
304	60.6	0.275	60.6	0.266	60.6	0.194	60.6	0.173
305	60.8	0.275	60.8	0.267	60.8	0.194	60.8	0.174
306	61	0.276	61	0.268	61	0.195	61	0.175
307	61.2	0.276	61.2	0.269	61.2	0.195	61.2	0.176
308	61.4	0.277	61.4	0.27	61.4	0.196	61.4	0.177
309	61.6	0.278	61.6	0.271	61.6	0.196	61.6	0.177
310	61.8	0.278	61.8	0.272	61.8	0.197	61.8	0.178
311	62	0.279	62	0.273	62	0.197	62	0.178
312	62.2	0.279	62.2	0.273	62.2	0.198	62.2	0.179
313	62.4	0.28	62.4	0.274	62.4	0.198	62.4	0.179
314	62.6	0.28	62.6	0.274	62.6	0.199	62.6	0.18
315	62.8	0.281	62.8	0.274	62.8	0.2	62.8	0.18
316	63	0.282	63	0.274	63	0.2	63	0.181
317	63.2	0.283	63.2	0.274	63.2	0.201	63.2	0.181
318	63.4	0.283	63.4	0.274	63.4	0.201	63.4	0.182
319	63.6	0.284	63.6	0.274	63.6	0.202	63.6	0.182
320	63.8	0.284	63.8	0.274	63.8	0.202	63.8	0.182
321	64	0.285	64	0.275	64	0.202	64	0.182
322	64.2	0.285	64.2	0.275	64.2	0.202	64.2	0.182
323	64.4	0.286	64.4	0.276	64.4	0.202	64.4	0.183
324	64.6	0.287	64.6	0.276	64.6	0.203	64.6	0.183
325	64.8	0.287	64.8	0.278	64.8	0.203	64.8	0.184
326	65	0.288	65	0.279	65	0.203	65	0.184
327	65.2	0.288	65.2	0.28	65.2	0.204	65.2	0.184
328	65.4	0.289	65.4	0.281	65.4	0.204	65.4	0.185
329	65.6	0.289	65.6	0.282	65.6	0.204	65.6	0.185
330	65.8	0.29	65.8	0.282	65.8	0.204	65.8	0.185
331	66	0.291	66	0.283	66	0.204	66	0.186
332	66.2	0.291	66.2	0.284	66.2	0.204	66.2	0.186
333	66.4	0.292	66.4	0.285	66.4	0.204	66.4	0.187
334	66.6	0.292	66.6	0.286	66.6	0.204	66.6	0.188
335	66.8	0.292	66.8	0.287	66.8	0.205	66.8	0.188
336	67	0.293	67	0.287	67	0.205	67	0.189
337	67.2	0.293	67.2	0.287	67.2	0.206	67.2	0.189
338	67.4	0.294	67.4	0.287	67.4	0.206	67.4	0.189
339	67.6	0.294	67.6	0.287	67.6	0.206	67.6	0.19
340	67.8	0.295	67.8	0.286	67.8	0.207	67.8	0.19
341	68	0.295	68	0.286	68	0.208	68	0.191
342	68.2	0.296	68.2	0.286	68.2	0.208	68.2	0.191
343	68.4	0.296	68.4	0.286	68.4	0.209	68.4	0.192
344	68.6	0.297	68.6	0.286	68.6	0.21	68.6	0.192
345	68.8	0.298	68.8	0.286	68.8	0.21	68.8	0.192
346	69	0.298	69	0.286	69	0.21	69	0.193
347	69.2	0.299	69.2	0.286	69.2	0.211	69.2	0.193
348	69.4	0.3	69.4	0.287	69.4	0.211	69.4	0.193
349	69.6	0.3	69.6	0.287	69.6	0.212	69.6	0.194
350	69.8	0.3	69.8	0.288	69.8	0.212	69.8	0.194
351	70	0.301	70	0.288	70	0.212	70	0.194
352	70.2	0.301	70.2	0.289	70.2	0.212	70.2	0.194
353	70.4	0.301	70.4	0.29	70.4	0.212	70.4	0.194
354	70.6	0.301	70.6	0.291	70.6	0.212	70.6	0.194
355	70.8	0.302	70.8	0.291	70.8	0.212	70.8	0.194
356	71	0.302	71	0.292	71	0.213	71	0.194
357	71.2	0.303	71.2	0.292	71.2	0.213	71.2	0.194
358	71.4	0.304	71.4	0.292	71.4	0.213	71.4	0.194
359	71.6	0.304	71.6	0.293	71.6	0.214	71.6	0.194
360	71.8	0.304	71.8	0.294	71.8	0.214	71.8	0.195
361	72	0.305	72	0.295	72	0.214	72	0.196
362	72.2	0.305	72.2	0.296	72.2	0.215	72.2	0.196
363	72.4	0.306	72.4	0.297	72.4	0.215	72.4	0.197
364	72.6	0.307	72.6	0.297	72.6	0.215	72.6	0.198
365	72.8	0.308	72.8	0.298	72.8	0.216	72.8	0.199
366	73	0.308	73	0.298	73	0.216	73	0.199
367	73.2	0.309	73.2	0.298	73.2	0.216	73.2	0.2
368	73.4	0.309	73.4	0.299	73.4	0.217	73.4	0.201
369	73.6	0.309	73.6	0.299	73.6	0.217	73.6	0.201
370	73.8	0.309	73.8	0.299	73.8	0.217	73.8	0.202
371	74	0.309	74	0.299	74	0.217	74	0.202
372	74.2	0.309	74.2	0.299	74.2	0.218	74.2	0.202
373	74.4	0.309	74.4	0.298	74.4	0.218	74.4	0.203
374	74.6	0.309	74.6	0.298	74.6	0.219	74.6	0.203
375	74.8	0.31	74.8	0.298	74.8	0.219	74.8	0.203
376	75	0.31	75	0.298	75	0.22	75	0.203
377	75.2	0.31	75.2	0.298	75.2	0.22	75.2	0.203
378	75.4	0.311	75.4	0.298	75.4	0.22	75.4	0.203
379	75.6	0.311	75.6	0.299	75.6	0.221	75.6	0.203
380	75.8	0.311	75.8	0.299	75.8	0.221	75.8	0.203
381	76	0.312	76	0.299	76	0.221	76	0.203
382	76.2	0.312	76.2	0.299	76.2	0.221	76.2	0.203
383	76.4	0.313	76.4	0.299	76.4	0.222	76.4	0.203
384	76.6	0.313	76.6	0.3	76.6	0.222	76.6	0.203
385	76.8	0.313	76.8	0.3	76.8	0.223	76.8	0.203
386	77	0.313	77	0.301	77	0.223	77	0.203
387	77.2	0.313	77.2	0.301	77.2	0.223	77.2	0.204
388	77.4	0.314	77.4	0.302	77.4	0.223	77.4	0.204
389	77.6	0.314	77.6	0.302	77.6	0.224	77.6	0.205
390	77.8	0.314	77.8	0.303	77.8	0.224	77.8	0.205
391	78	0.315	78	0.303	78	0.224	78	0.206
392	78.2	0.315	78.2	0.304	78.2	0.225	78.2	0.206
393	78.4	0.315	78.4	0.304	78.4	0.225	78.4	0.207
394	78.6	0.316	78.6	0.305	78.6	0.225	78.6	0.207
395	78.8	0.316	78.8	0.306	78.8	0.226	78.8	0.207
396	79	0.317	79	0.307	79	0.226	79	0.207
397	79.2	0.317	79.2	0.308	79.2	0.226	79.2	0.208
398	79.4	0.318	79.4	0.309	79.4	0.226	79.4	0.208
399	79.6	0.319	79.6	0.31	79.6	0.226	79.6	0.208
400	79.8	0.319	79.8	0.31	79.8	0.227	79.8	0.208
401	80	0.32	80	0.31	80	0.227	80	0.209
402	80.2	0.32	80.2	0.311	80.2	0.228	80.2	0.209
403	80.4	0.32	80.4	0.311	80.4	0.228	80.4	0.21
404	80.6	0.32	80.6	0.311	80.6	0.228	80.6	0.21
405	80.8	0.321	80.8	0.311	80.8	0.228	80.8	0.211
406	81	0.321	81	0.31	81	0.229	81	0.211
407	81.2	0.322	81.2	0.31	81.2	0.229	81.2	0.212
408	81.4	0.322	81.4	0.309	81.4	0.23	81.4	0.212
409	81.6	0.323	81.6	0.308	81.6	0.23	81.6	0.212
410	81.8	0.323	81.8	0.308	81.8	0.231	81.8	0.212
411	82	0.323	82	0.307	82	0.231	82	0.212
412	82.2	0.324	82.2	0.307	82.2	0.232	82.2	0.212
413	82.4	0.324	82.4	0.307	82.4	0.232	82.4	0.212
414	82.6	0.323	82.6	0.307	82.6	0.232	82.6	0.213
415	82.8	0.324	82.8	0.308	82.8	0.232	82.8	0.213
416	83	0.324	83	0.308	83	0.232	83	0.213
417	83.2	0.324	83.2	0.308	83.2	0.231	83.2	0.213
418	83.4	0.324	83.4	0.309	83.4	0.231	83.4	0.214
419	83.6	0.325	83.6	0.309	83.6	0.231	83.6	0.214
420	83.8	0.325	83.8	0.31	83.8	0.231	83.8	0.215
421	84	0.325	84	0.311	84	0.231	84	0.215
422	84.2	0.325	84.2	0.312	84.2	0.232	84.2	0.216
423	84.4	0.326	84.4	0.313	84.4	0.232	84.4	0.216
424	84.6	0.326	84.6	0.314	84.6	0.232	84.6	0.217
425	84.8	0.327	84.8	0.315	84.8	0.232	84.8	0.217
426	85	0.327	85	0.315	85	0.233	85	0.217
427	85.2	0.327	85.2	0.316	85.2	0.233	85.2	0.217
428	85.4	0.328	85.4	0.317	85.4	0.234	85.4	0.217
429	85.6	0.328	85.6	0.317	85.6	0.234	85.6	0.217
430	85.8	0.328	85.8	0.318	85.8	0.235	85.8	0.217
431	86	0.329	86	0.318	86	0.235	86	0.217
432	86.2	0.329	86.2	0.319	86.2	0.235	86.2	0.217
433	86.4	0.329	86.4	0.319	86.4	0.235	86.4	0.217
434	86.6	0.33	86.6	0.319	86.6	0.235	86.6	0.218
435	86.8	0.33	86.8	0.32	86.8	0.235	86.8	0.218
436	87	0.33	87	0.32	87	0.235	87	0.218
437	87.2	0.331	87.2	0.32	87.2	0.235	87.2	0.218
438	87.4	0.332	87.4	0.32	87.4	0.235	87.4	0.218
439	87.6	0.332	87.6	0.321	87.6	0.236	87.6	0.218
440	87.8	0.332	87.8	0.321	87.8	0.236	87.8	0.219
441	88	0.333	88	0.322	88	0.237	88	0.219
442	88.2	0.333	88.2	0.322	88.2	0.237	88.2	0.219
443	88.4	0.333	88.4	0.322	88.4	0.238	88.4	0.219
444	88.6	0.333	88.6	0.322	88.6	0.238	88.6	0.22
445	88.8	0.333	88.8	0.322	88.8	0.239	88.8	0.22
446	89	0.334	89	0.321	89	0.239	89	0.221
447	89.2	0.334	89.2	0.321	89.2	0.24	89.2	0.221
448	89.4	0.334	89.4	0.321	89.4	0.24	89.4	0.222
449	89.6	0.334	89.6	0.321	89.6	0.24	89.6	0.222
450	89.8	0.334	89.8	0.321	89.8	0.24	89.8	0.222
451	90	0.334	90	0.321	90	0.241	90	0.223
452	90.2	0.334	90.2	0.321	90.2	0.24	90.2	0.223
453	90.4	0.334	90.4	0.321	90.4	0.24	90.4	0.224
454	90.6	0.334	90.6	0.322	90.6	0.241	90.6	0.224
455	90.8	0.334	90.8	0.322	90.8	0.241	90.8	0.225
456	91	0.334	91	0.323	91	0.241	91	0.225
457	91.2	0.334	91.2	0.323	91.2	0.241	91.2	0.225
458	91.4	0.334	91.4	0.324	91.4	0.241	91.4	0.225
459	91.6	0.335	91.6	0.325	91.6	0.241	91.6	0.225
460	91.8	0.335	91.8	0.326	91.8	0.242	91.8	0.226
461	92	0.336	92	0.326	92	0.242	92	0.226
462	92.2	0.337	92.2	0.326	92.2	0.242	92.2	0.226
463	92.4	0.337	92.4	0.326	92.4	0.242	92.4	0.227
464	92.6	0.338	92.6	0.326	92.6	0.242	92.6	0.227
465	92.8	0.339	92.8	0.326	92.8	0.243	92.8	0.228
466	93	0.34	93	0.326	93	0.243	93	0.228
467	93.2	0.341	93.2	0.326	93.2	0.243	93.2	0.229
468	93.4	0.341	93.4	0.326	93.4	0.244	93.4	0.229
469	93.6	0.341	93.6	0.326	93.6	0.244	93.6	0.23
470	93.8	0.341	93.8	0.326	93.8	0.244	93.8	0.23
471	94	0.341	94	0.326	94	0.244	94	0.23
472	94.2	0.341	94.2	0.326	94.2	0.244	94.2	0.23
473	94.4	0.341	94.4	0.327	94.4	0.245	94.4	0.23
474	94.6	0.341	94.6	0.327	94.6	0.245	94.6	0.23
475	94.8	0.341	94.8	0.328	94.8	0.245	94.8	0.23
476	95	0.341	95	0.329	95	0.245	95	0.23
477	95.2	0.341	95.2	0.329	95.2	0.246	95.2	0.23
478	95.4	0.341	95.4	0.33	95.4	0.246	95.4	0.23
479	95.6	0.342	95.6	0.331	95.6	0.246	95.6	0.229
480	95.8	0.342	95.8	0.331	95.8	0.246	95.8	0.229
481	96	0.343	96	0.332	96	0.246	96	0.229
482	96.2	0.343	96.2	0.332	96.2	0.246	96.2	0.229
483	96.4	0.343	96.4	0.333	96.4	0.247	96.4	0.23
484	96.6	0.343	96.6	0.334	96.6	0.247	96.6	0.23
485	96.8	0.343	96.8	0.334	96.8	0.247	96.8	0.231
486	97	0.344	97	0.334	97	0.247	97	0.231
487	97.2	0.344	97.2	0.334	97.2	0.247	97.2	0.232
488	97.4	0.344	97.4	0.335	97.4	0.248	97.4	0.233
489	97.6	0.344	97.6	0.335	97.6	0.248	97.6	0.233
490	97.8	0.344	97.8	0.334	97.8	0.248	97.8	0.233
491	98	0.345	98	0.334	98	0.248	98	0.234
492	98.2	0.345	98.2	0.334	98.2	0.248	98.2	0.234
493	98.4	0.345	98.4	0.334	98.4	0.248	98.4	0.234
494	98.6	0.345	98.6	0.334	98.6	0.249	98.6	0.234
495	98.8	0.345	98.8	0.334	98.8	0.249	98.8	0.234
496	99	0.346	99	0.333	99	0.249	99	0.233
497	99.2	0.347	99.2	0.333	99.2	0.249	99.2	0.233
498	99.4	0.347	99.4	0.333	99.4	0.25	99.4	0.233
499	99.6	0.348	99.6	0.334	99.6	0.25	99.6	0.233
500	99.8	0.348	99.8	0.334	99.8	0.25	99.8	0.233
501	100	0.348	100	0.335	100	0.25	100	0.233
502	100.2	0.348	100.2	0.335	100.2	0.25	100.2	0.233
503	100.4	0.349	100.4	0.336	100.4	0.25	100.4	0.233
504	100.6	0.349	100.6	0.337	100.6	0.25	100.6	0.233
505	100.8	0.349	100.8	0.337	100.8	0.25	100.8	0.233
506	101	0.35	101	0.337	101	0.251	101	0.234
507	101.2	0.35	101.2	0.338	101.2	0.251	101.2	0.234
508	101.4	0.35	101.4	0.338	101.4	0.251	101.4	0.234
509	101.6	0.35	101.6	0.338	101.6	0.251	101.6	0.234
510	101.8	0.35	101.8	0.339	101.8	0.252	101.8	0.235
511	102	0.35	102	0.339	102	0.252	102	0.235
512	102.2	0.35	102.2	0.339	102.2	0.252	102.2	0.235
513	102.4	0.35	102.4	0.339	102.4	0.253	102.4	0.235
514	102.6	0.351	102.6	0.339	102.6	0.253	102.6	0.235
515	102.8	0.351	102.8	0.339	102.8	0.254	102.8	0.235
516	103	0.352	103	0.339	103	0.254	103	0.236
517	103.2	0.352	103.2	0.339	103.2	0.255	103.2	0.236
518	103.4	0.353	103.4	0.339	103.4	0.255	103.4	0.236
519	103.6	0.353	103.6	0.338	103.6	0.255	103.6	0.236
520	103.8	0.353	103.8	0.338	103.8	0.255	103.8	0.237
521	104	0.353	104	0.338	104	0.255	104	0.237
522	104.2	0.353	104.2	0.338	104.2	0.255	104.2	0.237
523	104.4	0.353	104.4	0.338	104.4	0.255	104.4	0.237
524	104.6	0.353	104.6	0.338	104.6	0.255	104.6	0.237
525	104.8	0.352	104.8	0.338	104.8	0.255	104.8	0.237
526	105	0.352	105	0.338	105	0.255	105	0.237
527	105.2	0.351	105.2	0.339	105.2	0.255	105.2	0.238
528	105.4	0.351	105.4	0.339	105.4	0.256	105.4	0.238
529	105.6	0.351	105.6	0.339	105.6	0.256	105.6	0.239
530	105.8	0.351	105.8	0.34	105.8	0.256	105.8	0.24
531	106	0.351	106	0.34	106	0.257	106	0.24
532	106.2	0.351	106.2	0.341	106.2	0.257	106.2	0.24
533	106.4	0.351	106.4	0.342	106.4	0.257	106.4	0.241
534	106.6	0.351	106.6	0.342	106.6	0.258	106.6	0.241
535	106.8	0.351	106.8	0.343	106.8	0.258	106.8	0.241
536	107	0.352	107	0.343	107	0.258	107	0.241
537	107.2	0.353	107.2	0.343	107.2	0.258	107.2	0.241
538	107.4	0.353	107.4	0.343	107.4	0.259	107.4	0.241
539	107.6	0.354	107.6	0.343	107.6	0.259	107.6	0.242
540	107.8	0.355	107.8	0.343	107.8	0.259	107.8	0.241
541	108	0.355	108	0.343	108	0.259	108	0.241
542	108.2	0.356	108.2	0.342	108.2	0.259	108.2	0.241
543	108.4	0.356	108.4	0.343	108.4	0.26	108.4	0.241
544	108.6	0.356	108.6	0.343	108.6	0.26	108.6	0.241
545	108.8	0.356	108.8	0.343	108.8	0.26	108.8	0.241
546	109	0.355	109	0.343	109	0.26	109	0.242
547	109.2	0.355	109.2	0.343	109.2	0.261	109.2	0.242
548	109.4	0.355	109.4	0.343	109.4	0.261	109.4	0.242
549	109.6	0.355	109.6	0.343	109.6	0.261	109.6	0.243
550	109.8	0.355	109.8	0.344	109.8	0.261	109.8	0.243
551	110	0.356	110	0.344	110	0.261	110	0.243
552	110.2	0.356	110.2	0.345	110.2	0.261	110.2	0.243
553	110.4	0.356	110.4	0.345	110.4	0.261	110.4	0.243
554	110.6	0.356	110.6	0.345	110.6	0.261	110.6	0.243
555	110.8	0.356	110.8	0.345	110.8	0.262	110.8	0.243
556	111	0.356	111	0.345	111	0.262	111	0.243
557	111.2	0.356	111.2	0.346	111.2	0.262	111.2	0.244
558	111.4	0.357	111.4	0.346	111.4	0.262	111.4	0.244
559	111.6	0.357	111.6	0.347	111.6	0.263	111.6	0.245
560	111.8	0.357	111.8	0.348	111.8	0.263	111.8	0.245
561	112	0.357	112	0.348	112	0.263	112	0.245
562	112.2	0.357	112.2	0.349	112.2	0.264	112.2	0.245
563	112.4	0.357	112.4	0.349	112.4	0.264	112.4	0.245
564	112.6	0.357	112.6	0.35	112.6	0.264	112.6	0.245
565	112.8	0.358	112.8	0.35	112.8	0.264	112.8	0.245
566	113	0.358	113	0.35	113	0.264	113	0.245
567	113.2	0.358	113.2	0.351	113.2	0.264	113.2	0.245
568	113.4	0.358	113.4	0.351	113.4	0.264	113.4	0.245
569	113.6	0.359	113.6	0.351	113.6	0.264	113.6	0.245
570	113.8	0.359	113.8	0.351	113.8	0.264	113.8	0.245
571	114	0.359	114	0.35	114	0.264	114	0.245
572	114.2	0.359	114.2	0.35	114.2	0.264	114.2	0.245
573	114.4	0.359	114.4	0.349	114.4	0.265	114.4	0.245
574	114.6	0.359	114.6	0.349	114.6	0.265	114.6	0.245
575	114.8	0.36	114.8	0.349	114.8	0.266	114.8	0.246
576	115	0.36	115	0.349	115	0.266	115	0.246
577	115.2	0.36	115.2	0.349	115.2	0.266	115.2	0.247
578	115.4	0.36	115.4	0.35	115.4	0.266	115.4	0.247
579	115.6	0.361	115.6	0.351	115.6	0.266	115.6	0.247
580	115.8	0.361	115.8	0.352	115.8	0.266	115.8	0.247
581	116	0.362	116	0.352	116	0.266	116	0.247
582	116.2	0.363	116.2	0.352	116.2	0.266	116.2	0.247
583	116.4	0.363	116.4	0.353	116.4	0.266	116.4	0.246
584	116.6	0.363	116.6	0.353	116.6	0.266	116.6	0.246
585	116.8	0.363	116.8	0.353	116.8	0.266	116.8	0.246
586	117	0.364	117	0.353	117	0.266	117	0.246
587	117.2	0.363	117.2	0.353	117.2	0.267	117.2	0.246
588	117.4	0.363	117.4	0.352	117.4	0.267	117.4	0.247
589	117.6	0.363	117.6	0.352	117.6	0.267	117.6	0.247
590	117.8	0.363	117.8	0.351	117.8	0.267	117.8	0.247
591	118	0.362	118	0.351	118	0.267	118	0.247
592	118.2	0.362	118.2	0.351	118.2	0.268	118.2	0.247
593	118.4	0.362	118.4	0.351	118.4	0.268	118.4	0.248
594	118.6	0.362	118.6	0.351	118.6	0.268	118.6	0.248
595	118.8	0.363	118.8	0.352	118.8	0.268	118.8	0.248
596	119	0.363	119	0.352	119	0.268	119	0.249
597	119.2	0.363	119.2	0.353	119.2	0.268	119.2	0.249
598	119.4	0.363	119.4	0.354	119.4	0.268	119.4	0.25
599	119.6	0.363	119.6	0.354	119.6	0.268	119.6	0.25
600	119.8	0.364	119.8	0.354	119.8	0.268	119.8	0.25
601	120	0.364	120	0.354	120	0.269	120	0.251
602	120.2	0.364	120.2	0.354	120.2	0.269	120.2	0.251
603	120.4	0.364	120.4	0.354	120.4	0.269	120.4	0.251
604	120.6	0.364	120.6	0.353	120.6	0.269	120.6	0.251
605	120.8	0.364	120.8	0.353	120.8	0.268	120.8	0.251
606	121	0.365	121	0.352	121	0.268	121	0.25
607	121.2	0.365	121.2	0.351	121.2	0.268	121.2	0.25
608	121.4	0.364	121.4	0.351	121.4	0.268	121.4	0.25
609	121.6	0.364	121.6	0.351	121.6	0.268	121.6	0.249
610	121.8	0.364	121.8	0.351	121.8	0.268	121.8	0.249
611	122	0.365	122	0.351	122	0.268	122	0.249
612	122.2	0.365	122.2	0.352	122.2	0.269	122.2	0.248
613	122.4	0.365	122.4	0.352	122.4	0.269	122.4	0.248
614	122.6	0.366	122.6	0.353	122.6	0.27	122.6	0.249
615	122.8	0.366	122.8	0.354	122.8	0.27	122.8	0.249
616	123	0.367	123	0.355	123	0.271	123	0.249
617	123.2	0.367	123.2	0.356	123.2	0.272	123.2	0.25
618	123.4	0.367	123.4	0.357	123.4	0.272	123.4	0.25
619	123.6	0.367	123.6	0.357	123.6	0.273	123.6	0.25
620	123.8	0.367	123.8	0.358	123.8	0.273	123.8	0.251
621	124	0.367	124	0.358	124	0.274	124	0.251
622	124.2	0.367	124.2	0.358	124.2	0.274	124.2	0.252
623	124.4	0.367	124.4	0.358	124.4	0.274	124.4	0.252
624	124.6	0.367	124.6	0.357	124.6	0.274	124.6	0.252
625	124.8	0.367	124.8	0.357	124.8	0.274	124.8	0.252
626	125	0.367	125	0.357	125	0.274	125	0.252
627	125.2	0.367	125.2	0.357	125.2	0.273	125.2	0.252
628	125.4	0.366	125.4	0.357	125.4	0.273	125.4	0.252
629	125.6	0.366	125.6	0.358	125.6	0.273	125.6	0.252
630	125.8	0.366	125.8	0.358	125.8	0.273	125.8	0.252
631	126	0.366	126	0.358	126	0.273	126	0.252
632	126.2	0.366	126.2	0.359	126.2	0.273	126.2	0.253
633	126.4	0.367	126.4	0.36	126.4	0.273	126.4	0.253
634	126.6	0.367	126.6	0.36	126.6	0.273	126.6	0.253
635	126.8	0.367	126.8	0.361	126.8	0.274	126.8	0.253
636	127	0.368	127	0.361	127	0.274	127	0.253
637	127.2	0.368	127.2	0.361	127.2	0.275	127.2	0.253
638	127.4	0.369	127.4	0.361	127.4	0.276	127.4	0.254
639	127.6	0.369	127.6	0.362	127.6	0.277	127.6	0.254
640	127.8	0.369	127.8	0.362	127.8	0.278	127.8	0.254
641	128	0.37	128	0.362	128	0.278	128	0.254
642	128.2	0.37	128.2	0.362	128.2	0.279	128.2	0.254
643	128.4	0.37	128.4	0.362	128.4	0.279	128.4	0.255
644	128.6	0.37	128.6	0.362	128.6	0.279	128.6	0.255
645	128.8	0.37	128.8	0.362	128.8	0.279	128.8	0.255
646	129	0.37	129	0.362	129	0.279	129	0.256
647	129.2	0.37	129.2	0.361	129.2	0.279	129.2	0.256
648	129.4	0.37	129.4	0.361	129.4	0.279	129.4	0.256
649	129.6	0.369	129.6	0.361	129.6	0.279	129.6	0.256
650	129.8	0.369	129.8	0.361	129.8	0.279	129.8	0.255
651	130	0.369	130	0.362	130	0.278	130	0.255
652	130.2	0.369	130.2	0.363	130.2	0.278	130.2	0.254
653	130.4	0.369	130.4	0.363	130.4	0.277	130.4	0.254
654	130.6	0.369	130.6	0.363	130.6	0.277	130.6	0.254
655	130.8	0.37	130.8	0.364	130.8	0.277	130.8	0.254
656	131	0.37	131	0.364	131	0.277	131	0.255
657	131.2	0.371	131.2	0.364	131.2	0.277	131.2	0.255
658	131.4	0.372	131.4	0.364	131.4	0.278	131.4	0.255
659	131.6	0.373	131.6	0.364	131.6	0.278	131.6	0.255
660	131.8	0.373	131.8	0.364	131.8	0.278	131.8	0.255
661	132	0.374	132	0.364	132	0.278	132	0.255
662	132.2	0.374	132.2	0.364	132.2	0.278	132.2	0.256
663	132.4	0.374	132.4	0.363	132.4	0.278	132.4	0.256
664	132.6	0.374	132.6	0.363	132.6	0.279	132.6	0.256
665	132.8	0.374	132.8	0.363	132.8	0.279	132.8	0.257
666	133	0.374	133	0.363	133	0.279	133	0.257
667	133.2	0.374	133.2	0.364	133.2	0.279	133.2	0.257
668	133.4	0.374	133.4	0.364	133.4	0.28	133.4	0.257
669	133.6	0.374	133.6	0.365	133.6	0.28	133.6	0.257
670	133.8	0.373	133.8	0.366	133.8	0.28	133.8	0.257
671	134	0.373	134	0.366	134	0.28	134	0.257
672	134.2	0.373	134.2	0.367	134.2	0.281	134.2	0.257
673	134.4	0.373	134.4	0.368	134.4	0.281	134.4	0.257
674	134.6	0.373	134.6	0.368	134.6	0.282	134.6	0.258
675	134.8	0.373	134.8	0.369	134.8	0.282	134.8	0.258
676	135	0.374	135	0.368	135	0.282	135	0.259
677	135.2	0.374	135.2	0.368	135.2	0.282	135.2	0.259
678	135.4	0.374	135.4	0.368	135.4	0.282	135.4	0.259
679	135.6	0.374	135.6	0.367	135.6	0.283	135.6	0.259
680	135.8	0.374	135.8	0.367	135.8	0.283	135.8	0.259
681	136	0.374	136	0.366	136	0.283	136	0.259
682	136.2	0.374	136.2	0.366	136.2	0.283	136.2	0.259
683	136.4	0.374	136.4	0.366	136.4	0.283	136.4	0.26
684	136.6	0.374	136.6	0.367	136.6	0.283	136.6	0.26
685	136.8	0.374	136.8	0.367	136.8	0.284	136.8	0.26
686	137	0.374	137	0.368	137	0.284	137	0.26
687	137.2	0.374	137.2	0.368	137.2	0.284	137.2	0.26
688	137.4	0.374	137.4	0.368	137.4	0.284	137.4	0.26
689	137.6	0.375	137.6	0.368	137.6	0.285	137.6	0.261
690	137.8	0.376	137.8	0.369	137.8	0.285	137.8	0.261
691	138	0.376	138	0.37	138	0.286	138	0.262
692	138.2	0.377	138.2	0.371	138.2	0.286	138.2	0.262
693	138.4	0.377	138.4	0.371	138.4	0.286	138.4	0.263
694	138.6	0.378	138.6	0.372	138.6	0.285	138.6	0.263
695	138.8	0.378	138.8	0.372	138.8	0.285	138.8	0.264
696	139	0.379	139	0.372	139	0.285	139	0.264
697	139.2	0.379	139.2	0.372	139.2	0.285	139.2	0.264
698	139.4	0.379	139.4	0.371	139.4	0.285	139.4	0.264
699	139.6	0.379	139.6	0.37	139.6	0.285	139.6	0.264
700	139.8	0.378	139.8	0.37	139.8	0.285	139.8	0.264
701	140	0.378	140	0.369	140	0.284	140	0.264
702	140.2	0.377	140.2	0.369	140.2	0.284	140.2	0.263
703	140.4	0.377	140.4	0.37	140.4	0.284	140.4	0.263
704	140.6	0.377	140.6	0.37	140.6	0.284	140.6	0.262
705	140.8	0.377	140.8	0.37	140.8	0.285	140.8	0.261
706	141	0.377	141	0.37	141	0.285	141	0.261
707	141.2	0.377	141.2	0.37	141.2	0.285	141.2	0.261
708	141.4	0.377	141.4	0.37	141.4	0.286	141.4	0.261
709	141.6	0.377	141.6	0.37	141.6	0.287	141.6	0.261
710	141.8	0.377	141.8	0.369	141.8	0.287	141.8	0.261
711	142	0.377	142	0.369	142	0.287	142	0.261
712	142.2	0.377	142.2	0.369	142.2	0.287	142.2	0.262
713	142.4	0.377	142.4	0.369	142.4	0.288	142.4	0.262
714	142.6	0.376	142.6	0.369	142.6	0.288	142.6	0.262
715	142.8	0.376	142.8	0.369	142.8	0.288	142.8	0.262
716	143	0.376	143	0.369	143	0.288	143	0.263
717	143.2	0.375	143.2	0.369	143.2	0.288	143.2	0.263
718	143.4	0.375	143.4	0.369	143.4	0.287	143.4	0.263
719	143.6	0.375	143.6	0.37	143.6	0.287	143.6	0.263
720	143.8	0.375	143.8	0.37	143.8	0.287	143.8	0.263
721	144	0.376	144	0.371	144	0.287	144	0.263
722	144.2	0.376	144.2	0.372	144.2	0.287	144.2	0.263
723	144.4	0.377	144.4	0.373	144.4	0.287	144.4	0.263
724	144.6	0.377	144.6	0.374	144.6	0.287	144.6	0.263
725	144.8	0.378	144.8	0.375	144.8	0.287	144.8	0.263
726	145	0.379	145	0.376	145	0.288	145	0.264
727	145.2	0.379	145.2	0.376	145.2	0.288	145.2	0.264
728	145.4	0.379	145.4	0.377	145.4	0.289	145.4	0.264
729	145.6	0.38	145.6	0.376	145.6	0.289	145.6	0.265
730	145.8	0.38	145.8	0.376	145.8	0.289	145.8	0.265
731	146	0.38	146	0.376	146	0.29	146	0.265
732	146.2	0.38	146.2	0.376	146.2	0.29	146.2	0.265
733	146.4	0.379	146.4	0.376	146.4	0.291	146.4	0.265
734	146.6	0.379	146.6	0.376	146.6	0.291	146.6	0.265
735	146.8	0.379	146.8	0.377	146.8	0.291	146.8	0.265
736	147	0.379	147	0.377	147	0.292	147	0.265
737	147.2	0.379	147.2	0.377	147.2	0.292	147.2	0.265
738	147.4	0.379	147.4	0.377	147.4	0.292	147.4	0.265
739	147.6	0.379	147.6	0.377	147.6	0.292	147.6	0.265
740	147.8	0.38	147.8	0.377	147.8	0.291	147.8	0.265
741	148	0.38	148	0.377	148	0.291	148	0.266
742	148.2	0.38	148.2	0.376	148.2	0.291	148.2	0.266
743	148.4	0.38	148.4	0.376	148.4	0.291	148.4	0.266
744	148.6	0.381	148.6	0.376	148.6	0.291	148.6	0.266
745	148.8	0.381	148.8	0.375	148.8	0.291	148.8	0.266
746	149	0.381	149	0.375	149	0.291	149	0.266
747	149.2	0.381	149.2	0.374	149.2	0.291	149.2	0.266
748	149.4	0.381	149.4	0.374	149.4	0.291	149.4	0.266
749	149.6	0.381	149.6	0.373	149.6	0.291	149.6	0.266
750	149.8	0.381	149.8	0.373	149.8	0.291	149.8	0.266
751	150	0.381	150	0.373	150	0.291	150	0.266
752	150.2	0.381	150.2	0.374	150.2	0.291	150.2	0.266
753	150.4	0.382	150.4	0.374	150.4	0.292	150.4	0.266
754	150.6	0.382	150.6	0.374	150.6	0.292	150.6	0.266
755	150.8	0.383	150.8	0.375	150.8	0.292	150.8	0.266
756	151	0.383	151	0.375	151	0.292	151	0.267
757	151.2	0.384	151.2	0.375	151.2	0.292	151.2	0.267
758	151.4	0.384	151.4	0.375	151.4	0.291	151.4	0.267
759	151.6	0.385	151.6	0.375	151.6	0.291	151.6	0.268
760	151.8	0.385	151.8	0.375	151.8	0.291	151.8	0.268
761	152	0.385	152	0.376	152	0.291	152	0.269
762	152.2	0.385	152.2	0.376	152.2	0.292	152.2	0.269
763	152.4	0.386	152.4	0.376	152.4	0.292	152.4	0.269
764	152.6	0.386	152.6	0.376	152.6	0.292	152.6	0.269
765	152.8	0.386	152.8	0.376	152.8	0.292	152.8	0.27
766	153	0.386	153	0.376	153	0.292	153	0.27
767	153.2	0.386	153.2	0.377	153.2	0.293	153.2	0.27
768	153.4	0.386	153.4	0.377	153.4	0.293	153.4	0.269
769	153.6	0.386	153.6	0.378	153.6	0.293	153.6	0.269
770	153.8	0.386	153.8	0.379	153.8	0.293	153.8	0.269
771	154	0.386	154	0.379	154	0.294	154	0.268
772	154.2	0.386	154.2	0.379	154.2	0.294	154.2	0.268
773	154.4	0.386	154.4	0.38	154.4	0.294	154.4	0.268
774	154.6	0.386	154.6	0.38	154.6	0.294	154.6	0.268
775	154.8	0.386	154.8	0.38	154.8	0.294	154.8	0.268
776	155	0.386	155	0.38	155	0.294	155	0.268
777	155.2	0.386	155.2	0.381	155.2	0.294	155.2	0.268
778	155.4	0.387	155.4	0.381	155.4	0.295	155.4	0.268
779	155.6	0.386	155.6	0.381	155.6	0.295	155.6	0.267
780	155.8	0.386	155.8	0.381	155.8	0.296	155.8	0.267
781	156	0.386	156	0.381	156	0.296	156	0.267
782	156.2	0.386	156.2	0.381	156.2	0.297	156.2	0.268
783	156.4	0.386	156.4	0.38	156.4	0.297	156.4	0.268
784	156.6	0.385	156.6	0.38	156.6	0.298	156.6	0.268
785	156.8	0.385	156.8	0.379	156.8	0.298	156.8	0.268
786	157	0.385	157	0.379	157	0.298	157	0.268
787	157.2	0.385	157.2	0.379	157.2	0.299	157.2	0.268
788	157.4	0.385	157.4	0.379	157.4	0.299	157.4	0.268
789	157.6	0.385	157.6	0.379	157.6	0.299	157.6	0.268
790	157.8	0.385	157.8	0.379	157.8	0.299	157.8	0.268
791	158	0.385	158	0.379	158	0.299	158	0.268
792	158.2	0.385	158.2	0.38	158.2	0.299	158.2	0.268
793	158.4	0.385	158.4	0.38	158.4	0.299	158.4	0.269
794	158.6	0.385	158.6	0.38	158.6	0.299	158.6	0.269
795	158.8	0.386	158.8	0.38	158.8	0.299	158.8	0.27
796	159	0.386	159	0.379	159	0.299	159	0.27
797	159.2	0.386	159.2	0.38	159.2	0.298	159.2	0.27
798	159.4	0.387	159.4	0.38	159.4	0.298	159.4	0.271
799	159.6	0.387	159.6	0.38	159.6	0.298	159.6	0.271
800	159.8	0.387	159.8	0.38	159.8	0.298	159.8	0.271
801	160	0.388	160	0.38	160	0.298	160	0.27
802	160.2	0.388	160.2	0.38	160.2	0.298	160.2	0.27
803	160.4	0.388	160.4	0.38	160.4	0.299	160.4	0.27
804	160.6	0.389	160.6	0.38	160.6	0.299	160.6	0.27
805	160.8	0.389	160.8	0.38	160.8	0.299	160.8	0.27
806	161	0.39	161	0.38	161	0.299	161	0.27
807	161.2	0.39	161.2	0.381	161.2	0.299	161.2	0.27
808	161.4	0.39	161.4	0.381	161.4	0.3	161.4	0.27
809	161.6	0.39	161.6	0.382	161.6	0.3	161.6	0.27
810	161.8	0.39	161.8	0.383	161.8	0.3	161.8	0.27
811	162	0.39	162	0.383	162	0.3	162	0.27
812	162.2	0.39	162.2	0.383	162.2	0.3	162.2	0.27
813	162.4	0.39	162.4	0.383	162.4	0.3	162.4	0.271
814	162.6	0.389	162.6	0.382	162.6	0.3	162.6	0.271
815	162.8	0.389	162.8	0.381	162.8	0.3	162.8	0.272
816	163	0.389	163	0.381	163	0.3	163	0.272
817	163.2	0.388	163.2	0.381	163.2	0.3	163.2	0.272
818	163.4	0.388	163.4	0.381	163.4	0.3	163.4	0.272
819	163.6	0.388	163.6	0.382	163.6	0.3	163.6	0.272
820	163.8	0.388	163.8	0.382	163.8	0.3	163.8	0.272
821	164	0.388	164	0.383	164	0.3	164	0.272
822	164.2	0.387	164.2	0.384	164.2	0.3	164.2	0.273
823	164.4	0.387	164.4	0.384	164.4	0.3	164.4	0.273
824	164.6	0.388	164.6	0.385	164.6	0.301	164.6	0.274
825	164.8	0.388	164.8	0.386	164.8	0.301	164.8	0.274
826	165	0.388	165	0.387	165	0.301	165	0.274
827	165.2	0.389	165.2	0.388	165.2	0.302	165.2	0.275
828	165.4	0.389	165.4	0.389	165.4	0.302	165.4	0.275
829	165.6	0.389	165.6	0.389	165.6	0.302	165.6	0.275
830	165.8	0.389	165.8	0.389	165.8	0.302	165.8	0.275
831	166	0.389	166	0.389	166	0.302	166	0.275
832	166.2	0.389	166.2	0.389	166.2	0.302	166.2	0.275
833	166.4	0.39	166.4	0.388	166.4	0.303	166.4	0.275
834	166.6	0.39	166.6	0.388	166.6	0.303	166.6	0.275
835	166.8	0.39	166.8	0.387	166.8	0.302	166.8	0.275
836	167	0.39	167	0.387	167	0.302	167	0.275
837	167.2	0.39	167.2	0.386	167.2	0.302	167.2	0.275
838	167.4	0.39	167.4	0.386	167.4	0.302	167.4	0.275
839	167.6	0.39	167.6	0.387	167.6	0.302	167.6	0.275
840	167.8	0.39	167.8	0.387	167.8	0.302	167.8	0.275
841	168	0.39	168	0.387	168	0.302	168	0.274
842	168.2	0.39	168.2	0.387	168.2	0.302	168.2	0.274
843	168.4	0.39	168.4	0.387	168.4	0.302	168.4	0.274
844	168.6	0.391	168.6	0.387	168.6	0.302	168.6	0.274
845	168.8	0.391	168.8	0.387	168.8	0.301	168.8	0.274
846	169	0.391	169	0.387	169	0.301	169	0.274
847	169.2	0.391	169.2	0.388	169.2	0.301	169.2	0.274
848	169.4	0.391	169.4	0.388	169.4	0.301	169.4	0.274
849	169.6	0.392	169.6	0.388	169.6	0.302	169.6	0.274
850	169.8	0.392	169.8	0.387	169.8	0.302	169.8	0.274
851	170	0.392	170	0.387	170	0.302	170	0.274
852	170.2	0.392	170.2	0.386	170.2	0.302	170.2	0.275
853	170.4	0.392	170.4	0.386	170.4	0.303	170.4	0.275
854	170.6	0.392	170.6	0.386	170.6	0.303	170.6	0.275
855	170.8	0.392	170.8	0.386	170.8	0.303	170.8	0.275
856	171	0.392	171	0.386	171	0.303	171	0.275
857	171.2	0.391	171.2	0.386	171.2	0.304	171.2	0.276
858	171.4	0.391	171.4	0.387	171.4	0.304	171.4	0.276
859	171.6	0.391	171.6	0.387	171.6	0.304	171.6	0.276
860	171.8	0.391	171.8	0.388	171.8	0.304	171.8	0.276
861	172	0.391	172	0.388	172	0.304	172	0.276
862	172.2	0.391	172.2	0.388	172.2	0.304	172.2	0.276
863	172.4	0.392	172.4	0.389	172.4	0.304	172.4	0.276
864	172.6	0.392	172.6	0.389	172.6	0.304	172.6	0.276
865	172.8	0.392	172.8	0.389	172.8	0.304	172.8	0.276
866	173	0.392	173	0.389	173	0.304	173	0.276
867	173.2	0.393	173.2	0.389	173.2	0.304	173.2	0.276
868	173.4	0.393	173.4	0.388	173.4	0.304	173.4	0.275
869	173.6	0.393	173.6	0.388	173.6	0.304	173.6	0.275
870	173.8	0.393	173.8	0.388	173.8	0.305	173.8	0.275
871	174	0.394	174	0.387	174	0.305	174	0.276
872	174.2	0.394	174.2	0.387	174.2	0.305	174.2	0.276
873	174.4	0.395	174.4	0.387	174.4	0.305	174.4	0.276
874	174.6	0.395	174.6	0.387	174.6	0.305	174.6	0.277
875	174.8	0.395	174.8	0.388	174.8	0.306	174.8	0.277
876	175	0.395	175	0.388	175	0.306	175	0.277
877	175.2	0.395	175.2	0.389	175.2	0.306	175.2	0.277
878	175.4	0.395	175.4	0.389	175.4	0.306	175.4	0.278
879	175.6	0.395	175.6	0.389	175.6	0.306	175.6	0.278
880	175.8	0.395	175.8	0.39	175.8	0.306	175.8	0.278
881	176	0.395	176	0.39	176	0.306	176	0.279
882	176.2	0.394	176.2	0.39	176.2	0.306	176.2	0.279
883	176.4	0.394	176.4	0.389	176.4	0.306	176.4	0.279
884	176.6	0.395	176.6	0.389	176.6	0.307	176.6	0.278
885	176.8	0.395	176.8	0.389	176.8	0.307	176.8	0.278
886	177	0.395	177	0.389	177	0.307	177	0.278
887	177.2	0.396	177.2	0.389	177.2	0.307	177.2	0.278
888	177.4	0.396	177.4	0.39	177.4	0.308	177.4	0.278
889	177.6	0.396	177.6	0.39	177.6	0.308	177.6	0.278
890	177.8	0.396	177.8	0.39	177.8	0.309	177.8	0.278
891	178	0.396	178	0.39	178	0.309	178	0.278
892	178.2	0.397	178.2	0.39	178.2	0.309	178.2	0.278
893	178.4	0.397	178.4	0.39	178.4	0.309	178.4	0.278
894	178.6	0.396	178.6	0.39	178.6	0.31	178.6	0.278
895	178.8	0.396	178.8	0.391	178.8	0.31	178.8	0.278
896	179	0.396	179	0.391	179	0.31	179	0.278
897	179.2	0.395	179.2	0.392	179.2	0.309	179.2	0.278
898	179.4	0.395	179.4	0.392	179.4	0.309	179.4	0.278
899	179.6	0.395	179.6	0.392	179.6	0.309	179.6	0.278
900	179.8	0.394	179.8	0.392	179.8	0.309	179.8	0.279
901	180	0.394	180	0.392	180	0.309	180	0.279
902	180.2	0.394	180.2	0.392	180.2	0.309	180.2	0.279
903	180.4	0.394	180.4	0.393	180.4	0.309	180.4	0.28
904	180.6	0.394	180.6	0.393	180.6	0.308	180.6	0.279
905	180.8	0.394	180.8	0.393	180.8	0.308	180.8	0.279
906	181	0.394	181	0.394	181	0.308	181	0.279
907	181.2	0.395	181.2	0.394	181.2	0.308	181.2	0.279
908	181.4	0.395	181.4	0.394	181.4	0.308	181.4	0.279
909	181.6	0.395	181.6	0.394	181.6	0.309	181.6	0.279
910	181.8	0.395	181.8	0.394	181.8	0.309	181.8	0.279
911	182	0.395	182	0.394	182	0.309	182	0.278
912	182.2	0.395	182.2	0.394	182.2	0.31	182.2	0.278
913	182.4	0.396	182.4	0.394	182.4	0.31	182.4	0.277
914	182.6	0.396	182.6	0.395	182.6	0.311	182.6	0.277
915	182.8	0.397	182.8	0.395	182.8	0.311	182.8	0.277
916	183	0.397	183	0.395	183	0.311	183	0.277
917	183.2	0.397	183.2	0.395	183.2	0.311	183.2	0.276
918	183.4	0.398	183.4	0.395	183.4	0.311	183.4	0.276
919	183.6	0.398	183.6	0.395	183.6	0.311	183.6	0.277
920	183.8	0.398	183.8	0.395	183.8	0.311	183.8	0.277
921	184	0.397	184	0.395	184	0.311	184	0.277
922	184.2	0.397	184.2	0.395	184.2	0.311	184.2	0.277
923	184.4	0.397	184.4	0.395	184.4	0.311	184.4	0.277
924	184.6	0.397	184.6	0.395	184.6	0.311	184.6	0.277
925	184.8	0.397	184.8	0.395	184.8	0.311	184.8	0.277
926	185	0.396	185	0.395	185	0.312	185	0.277
927	185.2	0.396	185.2	0.395	185.2	0.312	185.2	0.277
928	185.4	0.396	185.4	0.395	185.4	0.312	185.4	0.278
929	185.6	0.395	185.6	0.395	185.6	0.313	185.6	0.278
930	185.8	0.395	185.8	0.395	185.8	0.313	185.8	0.278
931	186	0.395	186	0.395	186	0.313	186	0.278
932	186.2	0.396	186.2	0.396	186.2	0.314	186.2	0.278
933	186.4	0.396	186.4	0.396	186.4	0.314	186.4	0.279
934	186.6	0.397	186.6	0.397	186.6	0.314	186.6	0.279
935	186.8	0.397	186.8	0.397	186.8	0.315	186.8	0.28
936	187	0.398	187	0.396	187	0.315	187	0.28
937	187.2	0.398	187.2	0.396	187.2	0.315	187.2	0.28
938	187.4	0.398	187.4	0.396	187.4	0.315	187.4	0.281
939	187.6	0.398	187.6	0.396	187.6	0.315	187.6	0.281
940	187.8	0.398	187.8	0.397	187.8	0.315	187.8	0.281
941	188	0.398	188	0.397	188	0.315	188	0.281
942	188.2	0.398	188.2	0.397	188.2	0.315	188.2	0.282
943	188.4	0.398	188.4	0.396	188.4	0.315	188.4	0.282
944	188.6	0.398	188.6	0.396	188.6	0.316	188.6	0.282
945	188.8	0.398	188.8	0.396	188.8	0.316	188.8	0.282
946	189	0.398	189	0.396	189	0.317	189	0.282
947	189.2	0.398	189.2	0.396	189.2	0.317	189.2	0.282
948	189.4	0.398	189.4	0.396	189.4	0.317	189.4	0.283
949	189.6	0.398	189.6	0.396	189.6	0.317	189.6	0.283
950	189.8	0.399	189.8	0.396	189.8	0.317	189.8	0.283
951	190	0.399	190	0.397	190	0.317	190	0.284
952	190.2	0.399	190.2	0.397	190.2	0.316	190.2	0.284
953	190.4	0.399	190.4	0.397	190.4	0.317	190.4	0.284
954	190.6	0.398	190.6	0.397	190.6	0.317	190.6	0.284
955	190.8	0.398	190.8	0.397	190.8	0.317	190.8	0.284
956	191	0.398	191	0.397	191	0.317	191	0.284
957	191.2	0.398	191.2	0.397	191.2	0.317	191.2	0.283
958	191.4	0.398	191.4	0.398	191.4	0.317	191.4	0.283
959	191.6	0.398	191.6	0.398	191.6	0.317	191.6	0.282
960	191.8	0.398	191.8	0.398	191.8	0.317	191.8	0.282
961	192	0.398	192	0.398	192	0.317	192	0.282
962	192.2	0.399	192.2	0.398	192.2	0.318	192.2	0.282
963	192.4	0.399	192.4	0.397	192.4	0.318	192.4	0.282
964	192.6	0.399	192.6	0.397	192.6	0.318	192.6	0.282
965	192.8	0.399	192.8	0.396	192.8	0.318	192.8	0.283
966	193	0.399	193	0.396	193	0.318	193	0.283
967	193.2	0.399	193.2	0.396	193.2	0.317	193.2	0.283
968	193.4	0.399	193.4	0.396	193.4	0.317	193.4	0.283
969	193.6	0.399	193.6	0.396	193.6	0.317	193.6	0.283
970	193.8	0.399	193.8	0.397	193.8	0.317	193.8	0.283
971	194	0.399	194	0.397	194	0.318	194	0.283
972	194.2	0.4	194.2	0.397	194.2	0.318	194.2	0.283
973	194.4	0.4	194.4	0.398	194.4	0.319	194.4	0.282
974	194.6	0.4	194.6	0.398	194.6	0.319	194.6	0.282
975	194.8	0.4	194.8	0.399	194.8	0.319	194.8	0.282
976	195	0.401	195	0.399	195	0.319	195	0.282
977	195.2	0.401	195.2	0.4	195.2	0.319	195.2	0.282
978	195.4	0.401	195.4	0.4	195.4	0.319	195.4	0.283
979	195.6	0.402	195.6	0.4	195.6	0.319	195.6	0.283
980	195.8	0.402	195.8	0.4	195.8	0.319	195.8	0.283
981	196	0.402	196	0.399	196	0.319	196	0.283
982	196.2	0.402	196.2	0.399	196.2	0.319	196.2	0.284
983	196.4	0.402	196.4	0.398	196.4	0.319	196.4	0.284
984	196.6	0.402	196.6	0.398	196.6	0.319	196.6	0.284
985	196.8	0.402	196.8	0.398	196.8	0.319	196.8	0.284
986	197	0.402	197	0.398	197	0.319	197	0.284
987	197.2	0.401	197.2	0.398	197.2	0.319	197.2	0.283
988	197.4	0.401	197.4	0.399	197.4	0.32	197.4	0.283
989	197.6	0.401	197.6	0.399	197.6	0.32	197.6	0.283
990	197.8	0.401	197.8	0.4	197.8	0.32	197.8	0.283
991	198	0.401	198	0.4	198	0.321	198	0.283
992	198.2	0.401	198.2	0.401	198.2	0.321	198.2	0.283
993	198.4	0.402	198.4	0.401	198.4	0.321	198.4	0.283
994	198.6	0.402	198.6	0.401	198.6	0.321	198.6	0.283
995	198.8	0.402	198.8	0.4	198.8	0.32	198.8	0.284
996	199	0.402	199	0.4	199	0.32	199	0.284
997	199.2	0.402	199.2	0.4	199.2	0.32	199.2	0.284
998	199.4	0.402	199.4	0.4	199.4	0.32	199.4	0.284
999	199.6	0.402	199.6	0.399	199.6	0.32	199.6	0.285
1000	199.8	0.403	199.8	0.399	199.8	0.321	199.8	0.285
1001	200	0.403	200	0.399	200	0.321	200	0.285
1002	200.2	0.403	200.2	0.399	200.2	0.321	200.2	0.286
1003	200.4	0.403	200.4	0.399	200.4	0.321	200.4	0.286
1004	200.6	0.403	200.6	0.399	200.6	0.321	200.6	0.286
1005	200.8	0.403	200.8	0.399	200.8	0.321	200.8	0.286
1006	201	0.402	201	0.4	201	0.321	201	0.287
1007	201.2	0.402	201.2	0.401	201.2	0.321	201.2	0.287
1008	201.4	0.402	201.4	0.401	201.4	0.322	201.4	0.287
1009	201.6	0.402	201.6	0.402	201.6	0.322	201.6	0.287
1010	201.8	0.402	201.8	0.402	201.8	0.322	201.8	0.287
1011	202	0.402	202	0.402	202	0.322	202	0.287
1012	202.2	0.402	202.2	0.403	202.2	0.323	202.2	0.286
1013	202.4	0.402	202.4	0.403	202.4	0.323	202.4	0.286
1014	202.6	0.402	202.6	0.403	202.6	0.323	202.6	0.286
1015	202.8	0.402	202.8	0.403	202.8	0.323	202.8	0.286
1016	203	0.402	203	0.403	203	0.323	203	0.285
1017	203.2	0.402	203.2	0.403	203.2	0.323	203.2	0.285
1018	203.4	0.402	203.4	0.404	203.4	0.323	203.4	0.285
1019	203.6	0.403	203.6	0.404	203.6	0.324	203.6	0.285
1020	203.8	0.403	203.8	0.405	203.8	0.324	203.8	0.285
1021	204	0.403	204	0.405	204	0.324	204	0.285
1022	204.2	0.404	204.2	0.405	204.2	0.324	204.2	0.285
1023	204.4	0.404	204.4	0.405	204.4	0.324	204.4	0.286
1024	204.6	0.404	204.6	0.405	204.6	0.324	204.6	0.286
1025	204.8	0.404	204.8	0.405	204.8	0.324	204.8	0.286
1026	205	0.404	205	0.405	205	0.324	205	0.285
1027	205.2	0.404	205.2	0.404	205.2	0.325	205.2	0.286
1028	205.4	0.404	205.4	0.404	205.4	0.325	205.4	0.286
1029	205.6	0.404	205.6	0.403	205.6	0.325	205.6	0.286
1030	205.8	0.404	205.8	0.403	205.8	0.325	205.8	0.286
1031	206	0.403	206	0.402	206	0.324	206	0.286
1032	206.2	0.403	206.2	0.402	206.2	0.324	206.2	0.286
1033	206.4	0.402	206.4	0.402	206.4	0.324	206.4	0.286
1034	206.6	0.402	206.6	0.401	206.6	0.324	206.6	0.286
1035	206.8	0.401	206.8	0.402	206.8	0.325	206.8	0.286
1036	207	0.401	207	0.402	207	0.325	207	0.286
1037	207.2	0.401	207.2	0.402	207.2	0.325	207.2	0.286
1038	207.4	0.401	207.4	0.402	207.4	0.325	207.4	0.286
1039	207.6	0.402	207.6	0.403	207.6	0.325	207.6	0.287
1040	207.8	0.402	207.8	0.404	207.8	0.326	207.8	0.287
1041	208	0.403	208	0.404	208	0.326	208	0.288
1042	208.2	0.403	208.2	0.404	208.2	0.326	208.2	0.288
1043	208.4	0.404	208.4	0.405	208.4	0.326	208.4	0.289
1044	208.6	0.404	208.6	0.405	208.6	0.326	208.6	0.289
1045	208.8	0.404	208.8	0.405	208.8	0.326	208.8	0.289
1046	209	0.404	209	0.406	209	0.327	209	0.289
1047	209.2	0.404	209.2	0.406	209.2	0.327	209.2	0.289
1048	209.4	0.404	209.4	0.406	209.4	0.327	209.4	0.289
1049	209.6	0.404	209.6	0.406	209.6	0.327	209.6	0.289
1050	209.8	0.404	209.8	0.406	209.8	0.327	209.8	0.289
1051	210	0.404	210	0.406	210	0.327	210	0.289
1052	210.2	0.404	210.2	0.406	210.2	0.327	210.2	0.289
1053	210.4	0.404	210.4	0.406	210.4	0.327	210.4	0.288
1054	210.6	0.404	210.6	0.406	210.6	0.327	210.6	0.288
1055	210.8	0.404	210.8	0.406	210.8	0.327	210.8	0.288
1056	211	0.404	211	0.406	211	0.327	211	0.288
1057	211.2	0.404	211.2	0.405	211.2	0.327	211.2	0.288
1058	211.4	0.404	211.4	0.404	211.4	0.327	211.4	0.288
1059	211.6	0.405	211.6	0.404	211.6	0.327	211.6	0.288
1060	211.8	0.405	211.8	0.403	211.8	0.327	211.8	0.289
1061	212	0.405	212	0.403	212	0.328	212	0.289
1062	212.2	0.405	212.2	0.403	212.2	0.328	212.2	0.289
1063	212.4	0.405	212.4	0.402	212.4	0.328	212.4	0.289
1064	212.6	0.405	212.6	0.402	212.6	0.328	212.6	0.289
1065	212.8	0.405	212.8	0.402	212.8	0.328	212.8	0.288
1066	213	0.405	213	0.403	213	0.328	213	0.288
1067	213.2	0.405	213.2	0.403	213.2	0.328	213.2	0.287
1068	213.4	0.405	213.4	0.404	213.4	0.328	213.4	0.287
1069	213.6	0.405	213.6	0.404	213.6	0.328	213.6	0.287
1070	213.8	0.405	213.8	0.405	213.8	0.328	213.8	0.287
1071	214	0.405	214	0.405	214	0.328	214	0.288
1072	214.2	0.405	214.2	0.406	214.2	0.328	214.2	0.288
1073	214.4	0.405	214.4	0.407	214.4	0.328	214.4	0.287
1074	214.6	0.404	214.6	0.408	214.6	0.327	214.6	0.288
1075	214.8	0.404	214.8	0.408	214.8	0.327	214.8	0.288
1076	215	0.404	215	0.408	215	0.327	215	0.288
1077	215.2	0.404	215.2	0.409	215.2	0.328	215.2	0.288
1078	215.4	0.404	215.4	0.409	215.4	0.328	215.4	0.289
1079	215.6	0.404	215.6	0.409	215.6	0.328	215.6	0.289
1080	215.8	0.404	215.8	0.409	215.8	0.329	215.8	0.289
1081	216	0.405	216	0.408	216	0.329	216	0.29
1082	216.2	0.405	216.2	0.408	216.2	0.329	216.2	0.29
1083	216.4	0.405	216.4	0.408	216.4	0.329	216.4	0.29
1084	216.6	0.405	216.6	0.408	216.6	0.329	216.6	0.291
1085	216.8	0.406	216.8	0.408	216.8	0.329	216.8	0.291
1086	217	0.406	217	0.408	217	0.329	217	0.291
1087	217.2	0.407	217.2	0.409	217.2	0.33	217.2	0.291
1088	217.4	0.407	217.4	0.409	217.4	0.33	217.4	0.292
1089	217.6	0.407	217.6	0.409	217.6	0.331	217.6	0.292
1090	217.8	0.408	217.8	0.409	217.8	0.331	217.8	0.292
1091	218	0.408	218	0.409	218	0.331	218	0.292
1092	218.2	0.408	218.2	0.409	218.2	0.331	218.2	0.292
1093	218.4	0.409	218.4	0.409	218.4	0.331	218.4	0.292
1094	218.6	0.409	218.6	0.409	218.6	0.331	218.6	0.292
1095	218.8	0.409	218.8	0.409	218.8	0.331	218.8	0.292
1096	219	0.41	219	0.409	219	0.331	219	0.292
1097	219.2	0.41	219.2	0.408	219.2	0.331	219.2	0.292
1098	219.4	0.41	219.4	0.408	219.4	0.331	219.4	0.292
1099	219.6	0.409	219.6	0.408	219.6	0.331	219.6	0.292
1100	219.8	0.409	219.8	0.407	219.8	0.33	219.8	0.292
1101	220	0.409	220	0.407	220	0.329	220	0.292
1102	220.2	0.408	220.2	0.407	220.2	0.329	220.2	0.292
1103	220.4	0.408	220.4	0.407	220.4	0.329	220.4	0.292
1104	220.6	0.407	220.6	0.407	220.6	0.328	220.6	0.292
1105	220.8	0.407	220.8	0.407	220.8	0.328	220.8	0.292
1106	221	0.407	221	0.408	221	0.328	221	0.292
1107	221.2	0.408	221.2	0.408	221.2	0.328	221.2	0.292
1108	221.4	0.408	221.4	0.408	221.4	0.329	221.4	0.292
1109	221.6	0.408	221.6	0.408	221.6	0.329	221.6	0.292
1110	221.8	0.408	221.8	0.408	221.8	0.329	221.8	0.292
1111	222	0.408	222	0.408	222	0.33	222	0.292
1112	222.2	0.408	222.2	0.408	222.2	0.33	222.2	0.292
1113	222.4	0.408	222.4	0.408	222.4	0.33	222.4	0.292
1114	222.6	0.408	222.6	0.408	222.6	0.331	222.6	0.292
1115	222.8	0.409	222.8	0.408	222.8	0.332	222.8	0.292
1116	223	0.409	223	0.408	223	0.332	223	0.292
1117	223.2	0.409	223.2	0.408	223.2	0.333	223.2	0.292
1118	223.4	0.41	223.4	0.409	223.4	0.333	223.4	0.291
1119	223.6	0.41	223.6	0.408	223.6	0.333	223.6	0.291
1120	223.8	0.41	223.8	0.408	223.8	0.334	223.8	0.291
1121	224	0.41	224	0.408	224	0.334	224	0.291
1122	224.2	0.41	224.2	0.407	224.2	0.334	224.2	0.291
1123	224.4	0.409	224.4	0.407	224.4	0.335	224.4	0.291
1124	224.6	0.409	224.6	0.407	224.6	0.335	224.6	0.291
1125	224.8	0.409	224.8	0.407	224.8	0.335	224.8	0.291
1126	225	0.41	225	0.407	225	0.335	225	0.292
1127	225.2	0.41	225.2	0.407	225.2	0.335	225.2	0.292
1128	225.4	0.41	225.4	0.407	225.4	0.335	225.4	0.292
1129	225.6	0.41	225.6	0.407	225.6	0.334	225.6	0.292
1130	225.8	0.41	225.8	0.408	225.8	0.334	225.8	0.292
1131	226	0.41	226	0.409	226	0.334	226	0.292
1132	226.2	0.409	226.2	0.409	226.2	0.334	226.2	0.292
1133	226.4	0.409	226.4	0.41	226.4	0.334	226.4	0.292
1134	226.6	0.409	226.6	0.411	226.6	0.334	226.6	0.292
1135	226.8	0.409	226.8	0.411	226.8	0.334	226.8	0.293
1136	227	0.41	227	0.412	227	0.335	227	0.293
1137	227.2	0.41	227.2	0.412	227.2	0.335	227.2	0.293
1138	227.4	0.41	227.4	0.411	227.4	0.335	227.4	0.292
1139	227.6	0.411	227.6	0.411	227.6	0.335	227.6	0.292
1140	227.8	0.411	227.8	0.41	227.8	0.336	227.8	0.292
1141	228	0.41	228	0.41	228	0.336	228	0.293
1142	228.2	0.41	228.2	0.409	228.2	0.336	228.2	0.293
1143	228.4	0.41	228.4	0.409	228.4	0.336	228.4	0.293
1144	228.6	0.41	228.6	0.41	228.6	0.336	228.6	0.293
1145	228.8	0.41	228.8	0.41	228.8	0.337	228.8	0.292
1146	229	0.41	229	0.411	229	0.337	229	0.292
1147	229.2	0.41	229.2	0.412	229.2	0.337	229.2	0.292
1148	229.4	0.41	229.4	0.412	229.4	0.337	229.4	0.291
1149	229.6	0.41	229.6	0.413	229.6	0.337	229.6	0.291
1150	229.8	0.409	229.8	0.413	229.8	0.337	229.8	0.291
1151	230	0.409	230	0.413	230	0.337	230	0.291
1152	230.2	0.409	230.2	0.413	230.2	0.337	230.2	0.291
1153	230.4	0.409	230.4	0.413	230.4	0.337	230.4	0.291
1154	230.6	0.409	230.6	0.413	230.6	0.337	230.6	0.291
1155	230.8	0.41	230.8	0.413	230.8	0.337	230.8	0.292
1156	231	0.41	231	0.413	231	0.337	231	0.292
1157	231.2	0.41	231.2	0.413	231.2	0.337	231.2	0.292
1158	231.4	0.41	231.4	0.412	231.4	0.337	231.4	0.292
1159	231.6	0.41	231.6	0.412	231.6	0.337	231.6	0.292
1160	231.8	0.41	231.8	0.412	231.8	0.337	231.8	0.293
1161	232	0.411	232	0.412	232	0.338	232	0.293
1162	232.2	0.411	232.2	0.412	232.2	0.338	232.2	0.293
1163	232.4	0.411	232.4	0.413	232.4	0.338	232.4	0.293
1164	232.6	0.411	232.6	0.413	232.6	0.338	232.6	0.293
1165	232.8	0.411	232.8	0.414	232.8	0.338	232.8	0.294
1166	233	0.411	233	0.414	233	0.338	233	0.294
1167	233.2	0.411	233.2	0.414	233.2	0.338	233.2	0.294
1168	233.4	0.411	233.4	0.414	233.4	0.338	233.4	0.294
1169	233.6	0.411	233.6	0.413	233.6	0.338	233.6	0.294
1170	233.8	0.41	233.8	0.413	233.8	0.339	233.8	0.294
1171	234	0.41	234	0.413	234	0.339	234	0.294
1172	234.2	0.41	234.2	0.413	234.2	0.339	234.2	0.294
1173	234.4	0.41	234.4	0.413	234.4	0.339	234.4	0.294
1174	234.6	0.409	234.6	0.414	234.6	0.338	234.6	0.295
1175	234.8	0.409	234.8	0.414	234.8	0.338	234.8	0.295
1176	235	0.409	235	0.414	235	0.338	235	0.295
1177	235.2	0.408	235.2	0.414	235.2	0.339	235.2	0.295
1178	235.4	0.408	235.4	0.415	235.4	0.339	235.4	0.295
1179	235.6	0.408	235.6	0.415	235.6	0.339	235.6	0.295
1180	235.8	0.408	235.8	0.415	235.8	0.34	235.8	0.295
1181	236	0.409	236	0.415	236	0.34	236	0.295
1182	236.2	0.409	236.2	0.415	236.2	0.341	236.2	0.295
1183	236.4	0.409	236.4	0.416	236.4	0.341	236.4	0.295
1184	236.6	0.41	236.6	0.416	236.6	0.341	236.6	0.295
1185	236.8	0.41	236.8	0.416	236.8	0.342	236.8	0.294
1186	237	0.41	237	0.415	237	0.342	237	0.294
1187	237.2	0.411	237.2	0.415	237.2	0.343	237.2	0.294
1188	237.4	0.411	237.4	0.415	237.4	0.343	237.4	0.293
1189	237.6	0.412	237.6	0.415	237.6	0.343	237.6	0.293
1190	237.8	0.412	237.8	0.414	237.8	0.343	237.8	0.293
1191	238	0.413	238	0.414	238	0.343	238	0.293
1192	238.2	0.413	238.2	0.414	238.2	0.343	238.2	0.293
1193	238.4	0.413	238.4	0.414	238.4	0.342	238.4	0.294
1194	238.6	0.413	238.6	0.414	238.6	0.342	238.6	0.294
1195	238.8	0.413	238.8	0.415	238.8	0.342	238.8	0.295
1196	239	0.413	239	0.415	239	0.341	239	0.295
1197	239.2	0.413	239.2	0.416	239.2	0.341	239.2	0.296
1198	239.4	0.412	239.4	0.416	239.4	0.341	239.4	0.296
1199	239.6	0.412	239.6	0.417	239.6	0.341	239.6	0.296
1200	239.8	0.412	239.8	0.418	239.8	0.341	239.8	0.296
1201	240	0.413	240	0.418	240	0.341	240	0.296
1202	240.2	0.413	240.2	0.418	240.2	0.342	240.2	0.297
1203	240.4	0.412	240.4	0.419	240.4	0.342	240.4	0.297
1204	240.6	0.412	240.6	0.419	240.6	0.342	240.6	0.298
1205	240.8	0.412	240.8	0.419	240.8	0.342	240.8	0.298
1206	241	0.412	241	0.419	241	0.342	241	0.298
1207	241.2	0.412	241.2	0.42	241.2	0.343	241.2	0.298
1208	241.4	0.413	241.4	0.42	241.4	0.343	241.4	0.298
1209	241.6	0.413	241.6	0.42	241.6	0.343	241.6	0.298
1210	241.8	0.413	241.8	0.42	241.8	0.343	241.8	0.298
1211	242	0.413	242	0.421	242	0.343	242	0.297
1212	242.2	0.413	242.2	0.421	242.2	0.343	242.2	0.297
1213	242.4	0.414	242.4	0.421	242.4	0.343	242.4	0.297
1214	242.6	0.414	242.6	0.421	242.6	0.344	242.6	0.297
1215	242.8	0.414	242.8	0.421	242.8	0.344	242.8	0.297
1216	243	0.414	243	0.421	243	0.344	243	0.297
1217	243.2	0.414	243.2	0.421	243.2	0.344	243.2	0.296
1218	243.4	0.414	243.4	0.422	243.4	0.344	243.4	0.296
1219	243.6	0.414	243.6	0.422	243.6	0.344	243.6	0.295
1220	243.8	0.415	243.8	0.422	243.8	0.344	243.8	0.296
1221	244	0.415	244	0.422	244	0.343	244	0.296
1222	244.2	0.415	244.2	0.422	244.2	0.343	244.2	0.296
1223	244.4	0.415	244.4	0.422	244.4	0.342	244.4	0.297
1224	244.6	0.415	244.6	0.421	244.6	0.342	244.6	0.297
1225	244.8	0.415	244.8	0.421	244.8	0.342	244.8	0.297
1226	245	0.415	245	0.421	245	0.342	245	0.298
1227	245.2	0.415	245.2	0.42	245.2	0.342	245.2	0.298
1228	245.4	0.415	245.4	0.42	245.4	0.342	245.4	0.298
1229	245.6	0.415	245.6	0.42	245.6	0.342	245.6	0.297
1230	245.8	0.415	245.8	0.419	245.8	0.342	245.8	0.297
1231	246	0.415	246	0.418	246	0.342	246	0.297
1232	246.2	0.415	246.2	0.417	246.2	0.343	246.2	0.297
1233	246.4	0.414	246.4	0.417	246.4	0.343	246.4	0.297
1234	246.6	0.414	246.6	0.416	246.6	0.343	246.6	0.297
1235	246.8	0.414	246.8	0.416	246.8	0.344	246.8	0.296
1236	247	0.413	247	0.416	247	0.344	247	0.296
1237	247.2	0.413	247.2	0.416	247.2	0.344	247.2	0.296
1238	247.4	0.413	247.4	0.417	247.4	0.344	247.4	0.295
1239	247.6	0.413	247.6	0.417	247.6	0.344	247.6	0.295
1240	247.8	0.413	247.8	0.417	247.8	0.343	247.8	0.295
1241	248	0.413	248	0.418	248	0.343	248	0.295
1242	248.2	0.413	248.2	0.418	248.2	0.344	248.2	0.296
1243	248.4	0.413	248.4	0.418	248.4	0.344	248.4	0.296
1244	248.6	0.414	248.6	0.418	248.6	0.344	248.6	0.295
1245	248.8	0.414	248.8	0.418	248.8	0.344	248.8	0.295
1246	249	0.414	249	0.418	249	0.344	249	0.296
1247	249.2	0.414	249.2	0.418	249.2	0.344	249.2	0.296
1248	249.4	0.414	249.4	0.418	249.4	0.345	249.4	0.296
1249	249.6	0.415	249.6	0.418	249.6	0.345	249.6	0.297
1250	249.8	0.415	249.8	0.418	249.8	0.345	249.8	0.297
1251	250	0.415	250	0.417	250	0.345	250	0.297
1252	250.2	0.415	250.2	0.417	250.2	0.346	250.2	0.297
1253	250.4	0.415	250.4	0.417	250.4	0.346	250.4	0.297
1254	250.6	0.415	250.6	0.417	250.6	0.346	250.6	0.298
1255	250.8	0.415	250.8	0.417	250.8	0.347	250.8	0.298
1256	251	0.414	251	0.417	251	0.347	251	0.298
1257	251.2	0.414	251.2	0.417	251.2	0.347	251.2	0.298
1258	251.4	0.415	251.4	0.417	251.4	0.347	251.4	0.299
1259	251.6	0.415	251.6	0.417	251.6	0.347	251.6	0.299
1260	251.8	0.415	251.8	0.417	251.8	0.347	251.8	0.299
1261	252	0.416	252	0.417	252	0.346	252	0.299
1262	252.2	0.416	252.2	0.418	252.2	0.346	252.2	0.299
1263	252.4	0.416	252.4	0.418	252.4	0.345	252.4	0.299
1264	252.6	0.416	252.6	0.419	252.6	0.345	252.6	0.299
1265	252.8	0.417	252.8	0.419	252.8	0.345	252.8	0.299
1266	253	0.417	253	0.42	253	0.345	253	0.299
1267	253.2	0.417	253.2	0.42	253.2	0.345	253.2	0.299
1268	253.4	0.417	253.4	0.421	253.4	0.346	253.4	0.299
1269	253.6	0.417	253.6	0.421	253.6	0.346	253.6	0.299
1270	253.8	0.417	253.8	0.421	253.8	0.347	253.8	0.298
1271	254	0.417	254	0.422	254	0.347	254	0.298
1272	254.2	0.417	254.2	0.422	254.2	0.348	254.2	0.298
1273	254.4	0.417	254.4	0.422	254.4	0.348	254.4	0.297
1274	254.6	0.417	254.6	0.422	254.6	0.348	254.6	0.297
1275	254.8	0.417	254.8	0.422	254.8	0.349	254.8	0.297
1276	255	0.416	255	0.422	255	0.349	255	0.297
1277	255.2	0.416	255.2	0.421	255.2	0.349	255.2	0.297
1278	255.4	0.416	255.4	0.421	255.4	0.349	255.4	0.298
1279	255.6	0.416	255.6	0.421	255.6	0.349	255.6	0.298
1280	255.8	0.416	255.8	0.421	255.8	0.349	255.8	0.298
1281	256	0.416	256	0.421	256	0.348	256	0.298
1282	256.2	0.416	256.2	0.421	256.2	0.348	256.2	0.298
1283	256.4	0.416	256.4	0.421	256.4	0.348	256.4	0.298
1284	256.6	0.416	256.6	0.421	256.6	0.348	256.6	0.298
1285	256.8	0.416	256.8	0.421	256.8	0.348	256.8	0.298
1286	257	0.416	257	0.421	257	0.348	257	0.298
1287	257.2	0.416	257.2	0.421	257.2	0.349	257.2	0.298
1288	257.4	0.416	257.4	0.421	257.4	0.349	257.4	0.298
1289	257.6	0.417	257.6	0.421	257.6	0.349	257.6	0.298
1290	257.8	0.417	257.8	0.42	257.8	0.349	257.8	0.299
1291	258	0.418	258	0.42	258	0.349	258	0.299
1292	258.2	0.418	258.2	0.42	258.2	0.348	258.2	0.299
1293	258.4	0.418	258.4	0.42	258.4	0.348	258.4	0.299
1294	258.6	0.418	258.6	0.421	258.6	0.349	258.6	0.299
1295	258.8	0.418	258.8	0.421	258.8	0.349	258.8	0.299
1296	259	0.418	259	0.421	259	0.35	259	0.299
1297	259.2	0.418	259.2	0.422	259.2	0.351	259.2	0.299
1298	259.4	0.418	259.4	0.423	259.4	0.351	259.4	0.299
1299	259.6	0.418	259.6	0.423	259.6	0.352	259.6	0.299
1300	259.8	0.418	259.8	0.423	259.8	0.352	259.8	0.299
1301	260	0.418	260	0.424	260	0.352	260	0.299
1302	260.2	0.418	260.2	0.425	260.2	0.352	260.2	0.298
1303	260.4	0.417	260.4	0.425	260.4	0.351	260.4	0.298
1304	260.6	0.417	260.6	0.426	260.6	0.351	260.6	0.297
1305	260.8	0.417	260.8	0.426	260.8	0.351	260.8	0.297
1306	261	0.417	261	0.426	261	0.351	261	0.297
1307	261.2	0.416	261.2	0.426	261.2	0.35	261.2	0.298
1308	261.4	0.417	261.4	0.426	261.4	0.35	261.4	0.298
1309	261.6	0.417	261.6	0.426	261.6	0.349	261.6	0.299
1310	261.8	0.417	261.8	0.426	261.8	0.348	261.8	0.3
1311	262	0.417	262	0.426	262	0.348	262	0.3
1312	262.2	0.417	262.2	0.426	262.2	0.348	262.2	0.3
1313	262.4	0.416	262.4	0.426	262.4	0.348	262.4	0.3
1314	262.6	0.416	262.6	0.426	262.6	0.348	262.6	0.301
1315	262.8	0.416	262.8	0.426	262.8	0.349	262.8	0.301
1316	263	0.416	263	0.426	263	0.35	263	0.301
1317	263.2	0.416	263.2	0.426	263.2	0.351	263.2	0.301
1318	263.4	0.416	263.4	0.426	263.4	0.351	263.4	0.302
1319	263.6	0.416	263.6	0.426	263.6	0.352	263.6	0.302
1320	263.8	0.416	263.8	0.426	263.8	0.353	263.8	0.302
1321	264	0.416	264	0.426	264	0.353	264	0.301
1322	264.2	0.416	264.2	0.425	264.2	0.353	264.2	0.301
1323	264.4	0.416	264.4	0.425	264.4	0.353	264.4	0.301
1324	264.6	0.416	264.6	0.424	264.6	0.353	264.6	0.301
1325	264.8	0.416	264.8	0.424	264.8	0.353	264.8	0.3
1326	265	0.417	265	0.423	265	0.352	265	0.3
1327	265.2	0.417	265.2	0.422	265.2	0.352	265.2	0.3
1328	265.4	0.417	265.4	0.421	265.4	0.352	265.4	0.3
1329	265.6	0.418	265.6	0.421	265.6	0.352	265.6	0.3
1330	265.8	0.418	265.8	0.421	265.8	0.352	265.8	0.3
1331	266	0.418	266	0.421	266	0.352	266	0.3
1332	266.2	0.418	266.2	0.421	266.2	0.352	266.2	0.3
1333	266.4	0.418	266.4	0.422	266.4	0.353	266.4	0.3
1334	266.6	0.418	266.6	0.423	266.6	0.353	266.6	0.3
1335	266.8	0.418	266.8	0.424	266.8	0.353	266.8	0.3
1336	267	0.418	267	0.424	267	0.354	267	0.3
1337	267.2	0.418	267.2	0.425	267.2	0.354	267.2	0.3
1338	267.4	0.418	267.4	0.426	267.4	0.354	267.4	0.301
1339	267.6	0.419	267.6	0.427	267.6	0.354	267.6	0.301
1340	267.8	0.419	267.8	0.427	267.8	0.354	267.8	0.301
1341	268	0.419	268	0.428	268	0.354	268	0.301
1342	268.2	0.419	268.2	0.429	268.2	0.354	268.2	0.302
1343	268.4	0.419	268.4	0.429	268.4	0.353	268.4	0.302
1344	268.6	0.419	268.6	0.429	268.6	0.353	268.6	0.302
1345	268.8	0.419	268.8	0.428	268.8	0.353	268.8	0.302
1346	269	0.419	269	0.428	269	0.352	269	0.302
1347	269.2	0.419	269.2	0.428	269.2	0.352	269.2	0.302
1348	269.4	0.419	269.4	0.427	269.4	0.352	269.4	0.302
1349	269.6	0.419	269.6	0.427	269.6	0.352	269.6	0.302
1350	269.8	0.419	269.8	0.427	269.8	0.352	269.8	0.302
1351	270	0.419	270	0.427	270	0.352	270	0.302
1352	270.2	0.419	270.2	0.427	270.2	0.352	270.2	0.302
1353	270.4	0.419	270.4	0.427	270.4	0.351	270.4	0.302
1354	270.6	0.419	270.6	0.427	270.6	0.351	270.6	0.301
1355	270.8	0.419	270.8	0.427	270.8	0.351	270.8	0.301
1356	271	0.419	271	0.427	271	0.351	271	0.301
1357	271.2	0.419	271.2	0.427	271.2	0.351	271.2	0.301
1358	271.4	0.419	271.4	0.427	271.4	0.351	271.4	0.301
1359	271.6	0.419	271.6	0.427	271.6	0.352	271.6	0.301
1360	271.8	0.42	271.8	0.427	271.8	0.352	271.8	0.301
1361	272	0.42	272	0.427	272	0.352	272	0.301
1362	272.2	0.421	272.2	0.428	272.2	0.352	272.2	0.301
1363	272.4	0.421	272.4	0.428	272.4	0.353	272.4	0.302
1364	272.6	0.421	272.6	0.428	272.6	0.353	272.6	0.302
1365	272.8	0.421	272.8	0.428	272.8	0.353	272.8	0.302
1366	273	0.421	273	0.428	273	0.354	273	0.303
1367	273.2	0.42	273.2	0.429	273.2	0.355	273.2	0.302
1368	273.4	0.42	273.4	0.429	273.4	0.355	273.4	0.303
1369	273.6	0.42	273.6	0.429	273.6	0.355	273.6	0.302
1370	273.8	0.421	273.8	0.43	273.8	0.355	273.8	0.302
1371	274	0.421	274	0.43	274	0.355	274	0.302
1372	274.2	0.421	274.2	0.431	274.2	0.355	274.2	0.302
1373	274.4	0.421	274.4	0.431	274.4	0.355	274.4	0.302
1374	274.6	0.42	274.6	0.431	274.6	0.355	274.6	0.302
1375	274.8	0.42	274.8	0.43	274.8	0.354	274.8	0.302
1376	275	0.42	275	0.43	275	0.354	275	0.302
1377	275.2	0.42	275.2	0.429	275.2	0.354	275.2	0.302
1378	275.4	0.42	275.4	0.429	275.4	0.353	275.4	0.301
1379	275.6	0.42	275.6	0.428	275.6	0.353	275.6	0.301
1380	275.8	0.42	275.8	0.428	275.8	0.352	275.8	0.301
1381	276	0.42	276	0.427	276	0.352	276	0.301
1382	276.2	0.42	276.2	0.427	276.2	0.352	276.2	0.302
1383	276.4	0.419	276.4	0.427	276.4	0.352	276.4	0.302
1384	276.6	0.419	276.6	0.427	276.6	0.353	276.6	0.302
1385	276.8	0.419	276.8	0.427	276.8	0.353	276.8	0.303
1386	277	0.419	277	0.427	277	0.354	277	0.303
1387	277.2	0.419	277.2	0.427	277.2	0.354	277.2	0.303
1388	277.4	0.419	277.4	0.428	277.4	0.355	277.4	0.303
1389	277.6	0.42	277.6	0.428	277.6	0.355	277.6	0.303
1390	277.8	0.421	277.8	0.429	277.8	0.355	277.8	0.303
1391	278	0.421	278	0.429	278	0.355	278	0.303
1392	278.2	0.422	278.2	0.429	278.2	0.356	278.2	0.303
1393	278.4	0.422	278.4	0.43	278.4	0.356	278.4	0.304
1394	278.6	0.422	278.6	0.43	278.6	0.356	278.6	0.304
1395	278.8	0.422	278.8	0.43	278.8	0.357	278.8	0.304
1396	279	0.422	279	0.43	279	0.357	279	0.304
1397	279.2	0.422	279.2	0.429	279.2	0.357	279.2	0.304
1398	279.4	0.422	279.4	0.429	279.4	0.357	279.4	0.304
1399	279.6	0.422	279.6	0.429	279.6	0.356	279.6	0.304
1400	279.8	0.422	279.8	0.428	279.8	0.356	279.8	0.304
1401	280	0.422	280	0.428	280	0.356	280	0.304
1402	280.2	0.422	280.2	0.428	280.2	0.356	280.2	0.304
1403	280.4	0.422	280.4	0.428	280.4	0.356	280.4	0.304
1404	280.6	0.422	280.6	0.428	280.6	0.356	280.6	0.304
1405	280.8	0.422	280.8	0.428	280.8	0.356	280.8	0.304
1406	281	0.422	281	0.428	281	0.356	281	0.304
1407	281.2	0.422	281.2	0.427	281.2	0.356	281.2	0.304
1408	281.4	0.422	281.4	0.427	281.4	0.355	281.4	0.303
1409	281.6	0.422	281.6	0.427	281.6	0.355	281.6	0.303
1410	281.8	0.422	281.8	0.427	281.8	0.355	281.8	0.303
1411	282	0.422	282	0.427	282	0.355	282	0.303
1412	282.2	0.422	282.2	0.428	282.2	0.355	282.2	0.302
1413	282.4	0.421	282.4	0.428	282.4	0.355	282.4	0.302
1414	282.6	0.421	282.6	0.429	282.6	0.356	282.6	0.302
1415	282.8	0.421	282.8	0.429	282.8	0.356	282.8	0.302
1416	283	0.421	283	0.43	283	0.356	283	0.302
1417	283.2	0.421	283.2	0.43	283.2	0.357	283.2	0.302
1418	283.4	0.421	283.4	0.431	283.4	0.357	283.4	0.302
1419	283.6	0.421	283.6	0.431	283.6	0.357	283.6	0.302
1420	283.8	0.421	283.8	0.431	283.8	0.357	283.8	0.303
1421	284	0.422	284	0.431	284	0.358	284	0.303
1422	284.2	0.422	284.2	0.43	284.2	0.358	284.2	0.303
1423	284.4	0.422	284.4	0.43	284.4	0.359	284.4	0.303
1424	284.6	0.422	284.6	0.43	284.6	0.359	284.6	0.303
1425	284.8	0.423	284.8	0.429	284.8	0.36	284.8	0.303
1426	285	0.423	285	0.429	285	0.36	285	0.303
1427	285.2	0.423	285.2	0.428	285.2	0.36	285.2	0.303
1428	285.4	0.424	285.4	0.428	285.4	0.361	285.4	0.303
1429	285.6	0.424	285.6	0.428	285.6	0.361	285.6	0.303
1430	285.8	0.425	285.8	0.428	285.8	0.361	285.8	0.303
1431	286	0.425	286	0.429	286	0.361	286	0.303
1432	286.2	0.425	286.2	0.429	286.2	0.361	286.2	0.303
1433	286.4	0.425	286.4	0.43	286.4	0.36	286.4	0.303
1434	286.6	0.425	286.6	0.43	286.6	0.36	286.6	0.303
1435	286.8	0.424	286.8	0.431	286.8	0.36	286.8	0.303
1436	287	0.424	287	0.431	287	0.36	287	0.303
1437	287.2	0.424	287.2	0.431	287.2	0.36	287.2	0.303
1438	287.4	0.424	287.4	0.431	287.4	0.359	287.4	0.303
1439	287.6	0.423	287.6	0.431	287.6	0.359	287.6	0.303
1440	287.8	0.423	287.8	0.431	287.8	0.359	287.8	0.304
1441	288	0.423	288	0.431	288	0.359	288	0.304
1442	288.2	0.422	288.2	0.431	288.2	0.359	288.2	0.304
1443	288.4	0.422	288.4	0.432	288.4	0.36	288.4	0.304
1444	288.6	0.422	288.6	0.432	288.6	0.36	288.6	0.305
1445	288.8	0.422	288.8	0.433	288.8	0.36	288.8	0.304
1446	289	0.422	289	0.433	289	0.361	289	0.304
1447	289.2	0.422	289.2	0.433	289.2	0.361	289.2	0.304
1448	289.4	0.422	289.4	0.433	289.4	0.361	289.4	0.304
1449	289.6	0.423	289.6	0.433	289.6	0.361	289.6	0.304
1450	289.8	0.423	289.8	0.433	289.8	0.361	289.8	0.304
1451	290	0.423	290	0.432	290	0.361	290	0.304
1452	290.2	0.423	290.2	0.432	290.2	0.361	290.2	0.304
1453	290.4	0.424	290.4	0.432	290.4	0.361	290.4	0.304
1454	290.6	0.424	290.6	0.432	290.6	0.361	290.6	0.304
1455	290.8	0.424	290.8	0.431	290.8	0.361	290.8	0.304
1456	291	0.424	291	0.431	291	0.361	291	0.303
1457	291.2	0.424	291.2	0.431	291.2	0.361	291.2	0.303
1458	291.4	0.424	291.4	0.431	291.4	0.361	291.4	0.303
1459	291.6	0.424	291.6	0.432	291.6	0.361	291.6	0.303
1460	291.8	0.424	291.8	0.433	291.8	0.361	291.8	0.303
1461	292	0.425	292	0.434	292	0.36	292	0.303
1462	292.2	0.425	292.2	0.435	292.2	0.36	292.2	0.303
1463	292.4	0.425	292.4	0.436	292.4	0.36	292.4	0.303
1464	292.6	0.425	292.6	0.436	292.6	0.36	292.6	0.303
1465	292.8	0.425	292.8	0.436	292.8	0.36	292.8	0.303
1466	293	0.425	293	0.436	293	0.36	293	0.303
1467	293.2	0.425	293.2	0.436	293.2	0.36	293.2	0.303
1468	293.4	0.425	293.4	0.436	293.4	0.36	293.4	0.303
1469	293.6	0.425	293.6	0.435	293.6	0.36	293.6	0.303
1470	293.8	0.424	293.8	0.435	293.8	0.36	293.8	0.303
1471	294	0.424	294	0.435	294	0.361	294	0.303
1472	294.2	0.425	294.2	0.435	294.2	0.361	294.2	0.303
1473	294.4	0.424	294.4	0.435	294.4	0.361	294.4	0.303
1474	294.6	0.424	294.6	0.435	294.6	0.362	294.6	0.304
1475	294.8	0.424	294.8	0.435	294.8	0.362	294.8	0.304
1476	295	0.424	295	0.435	295	0.362	295	0.304
1477	295.2	0.424	295.2	0.436	295.2	0.362	295.2	0.304
1478	295.4	0.424	295.4	0.436	295.4	0.363	295.4	0.305
1479	295.6	0.424	295.6	0.436	295.6	0.363	295.6	0.305
1480	295.8	0.424	295.8	0.437	295.8	0.364	295.8	0.305
1481	296	0.424	296	0.437	296	0.364	296	0.305
1482	296.2	0.424	296.2	0.437	296.2	0.365	296.2	0.305
1483	296.4	0.424	296.4	0.436	296.4	0.365	296.4	0.305
1484	296.6	0.425	296.6	0.436	296.6	0.364	296.6	0.306
1485	296.8	0.425	296.8	0.436	296.8	0.364	296.8	0.306
1486	297	0.425	297	0.435	297	0.364	297	0.306
1487	297.2	0.425	297.2	0.435	297.2	0.364	297.2	0.306
1488	297.4	0.425	297.4	0.435	297.4	0.364	297.4	0.305
1489	297.6	0.425	297.6	0.435	297.6	0.364	297.6	0.305
1490	297.8	0.425	297.8	0.435	297.8	0.363	297.8	0.305
1491	298	0.425	298	0.435	298	0.363	298	0.305
1492	298.2	0.425	298.2	0.435	298.2	0.363	298.2	0.305
1493	298.4	0.425	298.4	0.435	298.4	0.363	298.4	0.305
1494	298.6	0.425	298.6	0.435	298.6	0.362	298.6	0.306
1495	298.8	0.425	298.8	0.435	298.8	0.362	298.8	0.306
1496	299	0.424	299	0.436	299	0.362	299	0.307
1497	299.2	0.424	299.2	0.436	299.2	0.362	299.2	0.307
1498	299.4	0.424	299.4	0.436	299.4	0.363	299.4	0.307
1499	299.6	0.424	299.6	0.436	299.6	0.363	299.6	0.307
1500	299.8	0.424	299.8	0.436	299.8	0.363	299.8	0.307
1501	300	0.424	300	0.436	300	0.363	300	0.307
1502	300.2	0.425	300.2	0.436	300.2	0.363	300.2	0.306
1503	300.4	0.425	300.4	0.437	300.4	0.363	300.4	0.306
1504	300.6	0.425	300.6	0.437	300.6	0.363	300.6	0.306
1505	300.8	0.425	300.8	0.437	300.8	0.363	300.8	0.305
1506	301	0.425	301	0.437	301	0.364	301	0.304
1507	301.2	0.425	301.2	0.437	301.2	0.364	301.2	0.304
1508	301.4	0.425	301.4	0.437	301.4	0.364	301.4	0.304
1509	301.6	0.425	301.6	0.437	301.6	0.364	301.6	0.303
1510	301.8	0.425	301.8	0.437	301.8	0.364	301.8	0.303
1511	302	0.426	302	0.437	302	0.364	302	0.303
1512	302.2	0.426	302.2	0.437	302.2	0.364	302.2	0.303
1513	302.4	0.426	302.4	0.437	302.4	0.364	302.4	0.304
1514	302.6	0.426	302.6	0.437	302.6	0.364	302.6	0.305
1515	302.8	0.426	302.8	0.437	302.8	0.364	302.8	0.305
1516	303	0.426	303	0.437	303	0.364	303	0.306
1517	303.2	0.426	303.2	0.437	303.2	0.364	303.2	0.306
1518	303.4	0.426	303.4	0.437	303.4	0.364	303.4	0.306
1519	303.6	0.426	303.6	0.437	303.6	0.364	303.6	0.307
1520	303.8	0.426	303.8	0.437	303.8	0.364	303.8	0.307
1521	304	0.425	304	0.437	304	0.364	304	0.307
1522	304.2	0.425	304.2	0.437	304.2	0.364	304.2	0.307
1523	304.4	0.425	304.4	0.437	304.4	0.365	304.4	0.307
1524	304.6	0.425	304.6	0.438	304.6	0.365	304.6	0.306
1525	304.8	0.424	304.8	0.438	304.8	0.365	304.8	0.306
1526	305	0.424	305	0.437	305	0.365	305	0.306
1527	305.2	0.424	305.2	0.437	305.2	0.366	305.2	0.305
1528	305.4	0.424	305.4	0.437	305.4	0.366	305.4	0.305
1529	305.6	0.425	305.6	0.437	305.6	0.366	305.6	0.305
1530	305.8	0.425	305.8	0.436	305.8	0.367	305.8	0.305
1531	306	0.425	306	0.436	306	0.367	306	0.305
1532	306.2	0.426	306.2	0.436	306.2	0.367	306.2	0.305
1533	306.4	0.426	306.4	0.436	306.4	0.367	306.4	0.305
1534	306.6	0.426	306.6	0.436	306.6	0.367	306.6	0.305
1535	306.8	0.426	306.8	0.436	306.8	0.367	306.8	0.306
1536	307	0.426	307	0.437	307	0.367	307	0.306
1537	307.2	0.426	307.2	0.437	307.2	0.366	307.2	0.307
1538	307.4	0.427	307.4	0.437	307.4	0.366	307.4	0.307
1539	307.6	0.427	307.6	0.437	307.6	0.365	307.6	0.308
1540	307.8	0.427	307.8	0.437	307.8	0.365	307.8	0.308
1541	308	0.426	308	0.437	308	0.365	308	0.309
1542	308.2	0.426	308.2	0.437	308.2	0.364	308.2	0.309
1543	308.4	0.426	308.4	0.438	308.4	0.364	308.4	0.309
1544	308.6	0.426	308.6	0.438	308.6	0.365	308.6	0.309
1545	308.8	0.426	308.8	0.438	308.8	0.365	308.8	0.309
1546	309	0.426	309	0.438	309	0.365	309	0.309
1547	309.2	0.426	309.2	0.438	309.2	0.365	309.2	0.309
1548	309.4	0.426	309.4	0.438	309.4	0.365	309.4	0.309
1549	309.6	0.425	309.6	0.438	309.6	0.366	309.6	0.309
1550	309.8	0.425	309.8	0.438	309.8	0.366	309.8	0.309
1551	310	0.425	310	0.438	310	0.367	310	0.308
1552	310.2	0.425	310.2	0.439	310.2	0.367	310.2	0.308
1553	310.4	0.425	310.4	0.439	310.4	0.367	310.4	0.308
1554	310.6	0.425	310.6	0.439	310.6	0.368	310.6	0.308
1555	310.8	0.425	310.8	0.439	310.8	0.368	310.8	0.308
1556	311	0.425	311	0.439	311	0.368	311	0.308
1557	311.2	0.426	311.2	0.438	311.2	0.368	311.2	0.308
1558	311.4	0.426	311.4	0.438	311.4	0.368	311.4	0.308
1559	311.6	0.426	311.6	0.437	311.6	0.368	311.6	0.309
1560	311.8	0.426	311.8	0.437	311.8	0.368	311.8	0.309
1561	312	0.427	312	0.437	312	0.369	312	0.309
1562	312.2	0.427	312.2	0.437	312.2	0.369	312.2	0.309
1563	312.4	0.427	312.4	0.437	312.4	0.369	312.4	0.308
1564	312.6	0.427	312.6	0.437	312.6	0.37	312.6	0.308
1565	312.8	0.427	312.8	0.438	312.8	0.37	312.8	0.307
1566	313	0.427	313	0.438	313	0.37	313	0.307
1567	313.2	0.427	313.2	0.438	313.2	0.37	313.2	0.306
1568	313.4	0.427	313.4	0.439	313.4	0.37	313.4	0.306
1569	313.6	0.427	313.6	0.439	313.6	0.37	313.6	0.306
1570	313.8	0.427	313.8	0.439	313.8	0.37	313.8	0.306
1571	314	0.427	314	0.439	314	0.37	314	0.306
1572	314.2	0.427	314.2	0.439	314.2	0.37	314.2	0.306
1573	314.4	0.427	314.4	0.439	314.4	0.37	314.4	0.306
1574	314.6	0.427	314.6	0.438	314.6	0.37	314.6	0.306
1575	314.8	0.427	314.8	0.438	314.8	0.369	314.8	0.306
1576	315	0.428	315	0.438	315	0.369	315	0.306
1577	315.2	0.428	315.2	0.438	315.2	0.369	315.2	0.307
1578	315.4	0.428	315.4	0.437	315.4	0.369	315.4	0.307
1579	315.6	0.428	315.6	0.437	315.6	0.369	315.6	0.307
1580	315.8	0.428	315.8	0.437	315.8	0.369	315.8	0.307
1581	316	0.428	316	0.437	316	0.369	316	0.307
1582	316.2	0.428	316.2	0.438	316.2	0.368	316.2	0.307
1583	316.4	0.428	316.4	0.438	316.4	0.368	316.4	0.308
1584	316.6	0.428	316.6	0.438	316.6	0.368	316.6	0.307
1585	316.8	0.429	316.8	0.438	316.8	0.368	316.8	0.307
1586	317	0.429	317	0.437	317	0.368	317	0.307
1587	317.2	0.429	317.2	0.437	317.2	0.368	317.2	0.307
1588	317.4	0.43	317.4	0.437	317.4	0.368	317.4	0.307
1589	317.6	0.43	317.6	0.437	317.6	0.368	317.6	0.307
1590	317.8	0.43	317.8	0.436	317.8	0.368	317.8	0.307
1591	318	0.43	318	0.436	318	0.368	318	0.307
1592	318.2	0.43	318.2	0.436	318.2	0.368	318.2	0.307
1593	318.4	0.43	318.4	0.435	318.4	0.369	318.4	0.307
1594	318.6	0.43	318.6	0.435	318.6	0.369	318.6	0.307
1595	318.8	0.43	318.8	0.435	318.8	0.37	318.8	0.307
1596	319	0.43	319	0.435	319	0.37	319	0.307
1597	319.2	0.43	319.2	0.435	319.2	0.371	319.2	0.307
1598	319.4	0.43	319.4	0.436	319.4	0.371	319.4	0.307
1599	319.6	0.43	319.6	0.436	319.6	0.372	319.6	0.307
1600	319.8	0.43	319.8	0.437	319.8	0.372	319.8	0.307
1601	320	0.43	320	0.437	320	0.373	320	0.307
1602	320.2	0.43	320.2	0.438	320.2	0.373	320.2	0.308
1603	320.4	0.43	320.4	0.438	320.4	0.373	320.4	0.308
1604	320.6	0.43	320.6	0.439	320.6	0.374	320.6	0.309
1605	320.8	0.43	320.8	0.439	320.8	0.373	320.8	0.309
1606	321	0.43	321	0.439	321	0.373	321	0.309
1607	321.2	0.43	321.2	0.44	321.2	0.373	321.2	0.308
1608	321.4	0.43	321.4	0.44	321.4	0.372	321.4	0.308
1609	321.6	0.43	321.6	0.44	321.6	0.372	321.6	0.308
1610	321.8	0.43	321.8	0.441	321.8	0.372	321.8	0.308
1611	322	0.429	322	0.441	322	0.371	322	0.308
1612	322.2	0.429	322.2	0.441	322.2	0.371	322.2	0.309
1613	322.4	0.429	322.4	0.442	322.4	0.371	322.4	0.309
1614	322.6	0.429	322.6	0.442	322.6	0.371	322.6	0.308
1615	322.8	0.429	322.8	0.443	322.8	0.371	322.8	0.308
1616	323	0.429	323	0.443	323	0.371	323	0.308
1617	323.2	0.429	323.2	0.443	323.2	0.371	323.2	0.308
1618	323.4	0.429	323.4	0.443	323.4	0.371	323.4	0.309
1619	323.6	0.429	323.6	0.442	323.6	0.371	323.6	0.309
1620	323.8	0.43	323.8	0.442	323.8	0.372	323.8	0.309
1621	324	0.43	324	0.441	324	0.372	324	0.309
1622	324.2	0.43	324.2	0.44	324.2	0.372	324.2	0.31
1623	324.4	0.43	324.4	0.44	324.4	0.372	324.4	0.31
1624	324.6	0.43	324.6	0.44	324.6	0.373	324.6	0.31
1625	324.8	0.43	324.8	0.439	324.8	0.373	324.8	0.309
1626	325	0.43	325	0.439	325	0.373	325	0.309
1627	325.2	0.43	325.2	0.439	325.2	0.373	325.2	0.309
1628	325.4	0.43	325.4	0.439	325.4	0.373	325.4	0.308
1629	325.6	0.429	325.6	0.439	325.6	0.373	325.6	0.308
1630	325.8	0.429	325.8	0.439	325.8	0.373	325.8	0.308
1631	326	0.429	326	0.44	326	0.373	326	0.308
1632	326.2	0.428	326.2	0.44	326.2	0.374	326.2	0.308
1633	326.4	0.428	326.4	0.441	326.4	0.375	326.4	0.307
1634	326.6	0.428	326.6	0.442	326.6	0.375	326.6	0.307
1635	326.8	0.428	326.8	0.443	326.8	0.376	326.8	0.307
1636	327	0.428	327	0.443	327	0.376	327	0.307
1637	327.2	0.428	327.2	0.444	327.2	0.376	327.2	0.307
1638	327.4	0.428	327.4	0.444	327.4	0.376	327.4	0.307
1639	327.6	0.427	327.6	0.445	327.6	0.376	327.6	0.307
1640	327.8	0.427	327.8	0.445	327.8	0.376	327.8	0.307
1641	328	0.427	328	0.446	328	0.376	328	0.307
1642	328.2	0.427	328.2	0.446	328.2	0.376	328.2	0.307
1643	328.4	0.427	328.4	0.446	328.4	0.376	328.4	0.307
1644	328.6	0.428	328.6	0.446	328.6	0.375	328.6	0.307
1645	328.8	0.428	328.8	0.446	328.8	0.375	328.8	0.307
1646	329	0.428	329	0.445	329	0.374	329	0.307
1647	329.2	0.429	329.2	0.445	329.2	0.373	329.2	0.307
1648	329.4	0.429	329.4	0.444	329.4	0.372	329.4	0.307
1649	329.6	0.429	329.6	0.444	329.6	0.371	329.6	0.307
1650	329.8	0.429	329.8	0.444	329.8	0.371	329.8	0.307
1651	330	0.429	330	0.444	330	0.371	330	0.307
1652	330.2	0.415	330.2	0.435	330.2	0.361	330.2	0.294
1653	330.4	0.399	330.4	0.425	330.4	0.349	330.4	0.28
1654	330.6	0.382	330.6	0.415	330.6	0.338	330.6	0.264
1655	330.8	0.365	330.8	0.404	330.8	0.326	330.8	0.249
1656	331	0.347	331	0.393	331	0.314	331	0.233
1657	331.2	0.331	331.2	0.383	331.2	0.302	331.2	0.218
1658	331.4	0.315	331.4	0.373	331.4	0.292	331.4	0.204
1659	331.6	0.301	331.6	0.365	331.6	0.282	331.6	0.191
1660	331.8	0.29	331.8	0.357	331.8	0.274	331.8	0.181
1661	332	0.281	332	0.351	332	0.268	332	0.174
1662	332.2	0.276	332.2	0.348	332.2	0.264	332.2	0.17
1663	332.4	0.271	332.4	0.345	332.4	0.26	332.4	0.166
1664	332.6	0.266	332.6	0.342	332.6	0.257	332.6	0.162
1665	332.8	0.262	332.8	0.339	332.8	0.254	332.8	0.159
1666	333	0.259	333	0.336	333	0.251	333	0.156
1667	333.2	0.255	333.2	0.334	333.2	0.248	333.2	0.153
1668	333.4	0.251	333.4	0.331	333.4	0.246	333.4	0.149
1669	333.6	0.247	333.6	0.328	333.6	0.243	333.6	0.146
1670	333.8	0.243	333.8	0.326	333.8	0.24	333.8	0.143
1671	334	0.24	334	0.323	334	0.238	334	0.141
1672	334.2	0.237	334.2	0.32	334.2	0.235	334.2	0.138
1673	334.4	0.234	334.4	0.318	334.4	0.234	334.4	0.136
1674	334.6	0.231	334.6	0.316	334.6	0.232	334.6	0.133
1675	334.8	0.228	334.8	0.314	334.8	0.23	334.8	0.131
1676	335	0.225	335	0.312	335	0.228	335	0.128
1677	335.2	0.222	335.2	0.311	335.2	0.226	335.2	0.126
1678	335.4	0.22	335.4	0.309	335.4	0.224	335.4	0.124
1679	335.6	0.218	335.6	0.308	335.6	0.223	335.6	0.123
1680	335.8	0.215	335.8	0.307	335.8	0.221	335.8	0.121
1681	336	0.213	336	0.305	336	0.219	336	0.12
1682	336.2	0.212	336.2	0.304	336.2	0.217	336.2	0.119
1683	336.4	0.21	336.4	0.303	336.4	0.216	336.4	0.117
1684	336.6	0.208	336.6	0.302	336.6	0.214	336.6	0.116
1685	336.8	0.206	336.8	0.3	336.8	0.213	336.8	0.114
1686	337	0.204	337	0.299	337	0.212	337	0.112
1687	337.2	0.202	337.2	0.298	337.2	0.211	337.2	0.11
1688	337.4	0.2	337.4	0.296	337.4	0.209	337.4	0.109
1689	337.6	0.198	337.6	0.294	337.6	0.208	337.6	0.107
1690	337.8	0.196	337.8	0.293	337.8	0.207	337.8	0.105
1691	338	0.195	338	0.291	338	0.206	338	0.103
1692	338.2	0.194	338.2	0.29	338.2	0.205	338.2	0.102
1693	338.4	0.192	338.4	0.289	338.4	0.204	338.4	0.1
1694	338.6	0.191	338.6	0.289	338.6	0.203	338.6	0.099
1695	338.8	0.189	338.8	0.288	338.8	0.202	338.8	0.098
1696	339	0.188	339	0.287	339	0.201	339	0.097
1697	339.2	0.187	339.2	0.287	339.2	0.199	339.2	0.096
1698	339.4	0.185	339.4	0.286	339.4	0.198	339.4	0.095
1699	339.6	0.184	339.6	0.285	339.6	0.197	339.6	0.094
1700	339.8	0.183	339.8	0.285	339.8	0.196	339.8	0.093
1701	340	0.182	340	0.284	340	0.196	340	0.092
1702	340.2	0.181	340.2	0.283	340.2	0.195	340.2	0.091
1703	340.4	0.18	340.4	0.282	340.4	0.194	340.4	0.09
1704	340.6	0.179	340.6	0.281	340.6	0.194	340.6	0.089
1705	340.8	0.178	340.8	0.281	340.8	0.193	340.8	0.088
1706	341	0.177	341	0.28	341	0.192	341	0.087
1707	341.2	0.175	341.2	0.279	341.2	0.192	341.2	0.086
1708	341.4	0.174	341.4	0.278	341.4	0.192	341.4	0.085
1709	341.6	0.173	341.6	0.277	341.6	0.191	341.6	0.084
1710	341.8	0.172	341.8	0.277	341.8	0.191	341.8	0.083
1711	342	0.171	342	0.276	342	0.19	342	0.083
1712	342.2	0.17	342.2	0.275	342.2	0.189	342.2	0.082
1713	342.4	0.169	342.4	0.275	342.4	0.189	342.4	0.081
1714	342.6	0.168	342.6	0.274	342.6	0.188	342.6	0.079
1715	342.8	0.167	342.8	0.273	342.8	0.187	342.8	0.078
1716	343	0.166	343	0.273	343	0.186	343	0.076
1717	343.2	0.166	343.2	0.272	343.2	0.185	343.2	0.075
1718	343.4	0.165	343.4	0.272	343.4	0.184	343.4	0.073
1719	343.6	0.164	343.6	0.271	343.6	0.184	343.6	0.072
1720	343.8	0.164	343.8	0.271	343.8	0.183	343.8	0.071
1721	344	0.163	344	0.27	344	0.182	344	0.071
1722	344.2	0.162	344.2	0.269	344.2	0.181	344.2	0.07
1723	344.4	0.161	344.4	0.268	344.4	0.18	344.4	0.07
1724	344.6	0.161	344.6	0.267	344.6	0.18	344.6	0.069
1725	344.8	0.16	344.8	0.267	344.8	0.179	344.8	0.069
1726	345	0.159	345	0.266	345	0.179	345	0.069
1727	345.2	0.158	345.2	0.265	345.2	0.178	345.2	0.069
1728	345.4	0.157	345.4	0.264	345.4	0.178	345.4	0.069
1729	345.6	0.156	345.6	0.263	345.6	0.177	345.6	0.069
1730	345.8	0.156	345.8	0.263	345.8	0.177	345.8	0.069
1731	346	0.155	346	0.262	346	0.176	346	0.069
1732	346.2	0.154	346.2	0.262	346.2	0.176	346.2	0.068
1733	346.4	0.154	346.4	0.261	346.4	0.175	346.4	0.067
1734	346.6	0.153	346.6	0.261	346.6	0.175	346.6	0.065
1735	346.8	0.153	346.8	0.261	346.8	0.174	346.8	0.064
1736	347	0.152	347	0.261	347	0.173	347	0.062
1737	347.2	0.152	347.2	0.261	347.2	0.173	347.2	0.061
1738	347.4	0.151	347.4	0.261	347.4	0.172	347.4	0.061
1739	347.6	0.151	347.6	0.261	347.6	0.172	347.6	0.06
1740	347.8	0.15	347.8	0.26	347.8	0.171	347.8	0.059
1741	348	0.15	348	0.26	348	0.171	348	0.059
1742	348.2	0.15	348.2	0.26	348.2	0.17	348.2	0.059
1743	348.4	0.149	348.4	0.259	348.4	0.17	348.4	0.058
1744	348.6	0.149	348.6	0.258	348.6	0.169	348.6	0.058
1745	348.8	0.148	348.8	0.258	348.8	0.169	348.8	0.058
1746	349	0.148	349	0.257	349	0.168	349	0.058
1747	349.2	0.147	349.2	0.256	349.2	0.168	349.2	0.057
1748	349.4	0.147	349.4	0.255	349.4	0.168	349.4	0.057
1749	349.6	0.146	349.6	0.254	349.6	0.167	349.6	0.056
1750	349.8	0.146	349.8	0.254	349.8	0.167	349.8	0.055
1751	350	0.145	350	0.253	350	0.166	350	0.054
1752	350.2	0.144	350.2	0.253	350.2	0.166	350.2	0.054
1753	350.4	0.143	350.4	0.253	350.4	0.166	350.4	0.053
1754	350.6	0.142	350.6	0.253	350.6	0.166	350.6	0.053
1755	350.8	0.141	350.8	0.253	350.8	0.165	350.8	0.053
1756	351	0.14	351	0.252	351	0.165	351	0.053
1757	351.2	0.139	351.2	0.252	351.2	0.165	351.2	0.052
1758	351.4	0.139	351.4	0.252	351.4	0.164	351.4	0.053
1759	351.6	0.138	351.6	0.251	351.6	0.164	351.6	0.053
1760	351.8	0.138	351.8	0.251	351.8	0.163	351.8	0.053
1761	352	0.137	352	0.25	352	0.163	352	0.053
1762	352.2	0.137	352.2	0.25	352.2	0.162	352.2	0.053
1763	352.4	0.137	352.4	0.249	352.4	0.162	352.4	0.053
1764	352.6	0.137	352.6	0.249	352.6	0.161	352.6	0.052
1765	352.8	0.137	352.8	0.248	352.8	0.161	352.8	0.051
1766	353	0.137	353	0.248	353	0.161	353	0.051
1767	353.2	0.136	353.2	0.247	353.2	0.161	353.2	0.05
1768	353.4	0.136	353.4	0.247	353.4	0.161	353.4	0.049
1769	353.6	0.136	353.6	0.246	353.6	0.161	353.6	0.049
1770	353.8	0.136	353.8	0.246	353.8	0.161	353.8	0.048
1771	354	0.135	354	0.246	354	0.16	354	0.048
1772	354.2	0.135	354.2	0.246	354.2	0.16	354.2	0.048
1773	354.4	0.134	354.4	0.246	354.4	0.16	354.4	0.048
1774	354.6	0.134	354.6	0.245	354.6	0.16	354.6	0.048
1775	354.8	0.133	354.8	0.245	354.8	0.159	354.8	0.048
1776	355	0.132	355	0.244	355	0.159	355	0.047
1777	355.2	0.132	355.2	0.244	355.2	0.159	355.2	0.047
1778	355.4	0.131	355.4	0.243	355.4	0.158	355.4	0.047
1779	355.6	0.131	355.6	0.243	355.6	0.158	355.6	0.046
1780	355.8	0.13	355.8	0.242	355.8	0.157	355.8	0.046
1781	356	0.13	356	0.242	356	0.156	356	0.045
1782	356.2	0.129	356.2	0.241	356.2	0.156	356.2	0.045
1783	356.4	0.129	356.4	0.241	356.4	0.155	356.4	0.044
1784	356.6	0.128	356.6	0.241	356.6	0.155	356.6	0.044
1785	356.8	0.128	356.8	0.241	356.8	0.154	356.8	0.043
1786	357	0.127	357	0.24	357	0.154	357	0.043
1787	357.2	0.126	357.2	0.24	357.2	0.154	357.2	0.042
1788	357.4	0.126	357.4	0.24	357.4	0.153	357.4	0.041
1789	357.6	0.126	357.6	0.239	357.6	0.153	357.6	0.041
1790	357.8	0.126	357.8	0.239	357.8	0.152	357.8	0.04
1791	358	0.125	358	0.239	358	0.152	358	0.04
1792	358.2	0.125	358.2	0.239	358.2	0.151	358.2	0.04
1793	358.4	0.124	358.4	0.238	358.4	0.151	358.4	0.04
1794	358.6	0.124	358.6	0.238	358.6	0.151	358.6	0.04
1795	358.8	0.123	358.8	0.238	358.8	0.15	358.8	0.04
1796	359	0.123	359	0.238	359	0.15	359	0.039
1797	359.2	0.122	359.2	0.237	359.2	0.15	359.2	0.039
1798	359.4	0.122	359.4	0.237	359.4	0.15	359.4	0.039
1799	359.6	0.122	359.6	0.237	359.6	0.15	359.6	0.039
1800	359.8	0.122	359.8	0.236	359.8	0.149	359.8	0.038
1801	360	0.122	360	0.236	360	0.149	360	0.038
1802	360.2	0.122	360.2	0.236	360.2	0.149	360.2	0.037
1803	360.4	0.121	360.4	0.236	360.4	0.149	360.4	0.037
1804	360.6	0.121	360.6	0.236	360.6	0.149	360.6	0.036
1805	360.8	0.121	360.8	0.235	360.8	0.149	360.8	0.036
1806	361	0.12	361	0.235	361	0.149	361	0.035
1807	361.2	0.12	361.2	0.235	361.2	0.149	361.2	0.035
1808	361.4	0.12	361.4	0.234	361.4	0.148	361.4	0.035
1809	361.6	0.12	361.6	0.234	361.6	0.148	361.6	0.035
1810	361.8	0.12	361.8	0.234	361.8	0.148	361.8	0.034
1811	362	0.119	362	0.234	362	0.147	362	0.034
1812	362.2	0.118	362.2	0.234	362.2	0.147	362.2	0.034
1813	362.4	0.118	362.4	0.234	362.4	0.146	362.4	0.034
1814	362.6	0.117	362.6	0.234	362.6	0.146	362.6	0.034
1815	362.8	0.116	362.8	0.234	362.8	0.146	362.8	0.034
1816	363	0.116	363	0.233	363	0.145	363	0.034
1817	363.2	0.116	363.2	0.233	363.2	0.145	363.2	0.034
1818	363.4	0.115	363.4	0.233	363.4	0.145	363.4	0.034
1819	363.6	0.115	363.6	0.232	363.6	0.145	363.6	0.034
1820	363.8	0.115	363.8	0.232	363.8	0.145	363.8	0.034
1821	364	0.114	364	0.231	364	0.145	364	0.034
1822	364.2	0.114	364.2	0.231	364.2	0.145	364.2	0.033
1823	364.4	0.114	364.4	0.231	364.4	0.145	364.4	0.033
1824	364.6	0.114	364.6	0.23	364.6	0.145	364.6	0.033
1825	364.8	0.113	364.8	0.23	364.8	0.145	364.8	0.032
1826	365	0.113	365	0.23	365	0.145	365	0.032
1827	365.2	0.113	365.2	0.23	365.2	0.145	365.2	0.032
1828	365.4	0.113	365.4	0.229	365.4	0.144	365.4	0.032
1829	365.6	0.113	365.6	0.229	365.6	0.144	365.6	0.031
1830	365.8	0.112	365.8	0.229	365.8	0.143	365.8	0.031
1831	366	0.112	366	0.229	366	0.143	366	0.031
1832	366.2	0.112	366.2	0.229	366.2	0.142	366.2	0.03
1833	366.4	0.111	366.4	0.229	366.4	0.141	366.4	0.03
1834	366.6	0.111	366.6	0.229	366.6	0.141	366.6	0.03
1835	366.8	0.111	366.8	0.228	366.8	0.14	366.8	0.03
1836	367	0.111	367	0.228	367	0.14	367	0.03
1837	367.2	0.11	367.2	0.228	367.2	0.139	367.2	0.03
1838	367.4	0.11	367.4	0.227	367.4	0.139	367.4	0.029
1839	367.6	0.11	367.6	0.226	367.6	0.139	367.6	0.029
1840	367.8	0.109	367.8	0.226	367.8	0.139	367.8	0.029
1841	368	0.109	368	0.225	368	0.139	368	0.029
1842	368.2	0.109	368.2	0.225	368.2	0.139	368.2	0.029
1843	368.4	0.108	368.4	0.224	368.4	0.139	368.4	0.029
1844	368.6	0.108	368.6	0.224	368.6	0.139	368.6	0.029
1845	368.8	0.108	368.8	0.224	368.8	0.139	368.8	0.028
1846	369	0.108	369	0.224	369	0.139	369	0.028
1847	369.2	0.107	369.2	0.224	369.2	0.139	369.2	0.028
1848	369.4	0.107	369.4	0.224	369.4	0.139	369.4	0.028
1849	369.6	0.106	369.6	0.224	369.6	0.139	369.6	0.028
1850	369.8	0.106	369.8	0.225	369.8	0.138	369.8	0.027
1851	370	0.106	370	0.225	370	0.138	370	0.027
1852	370.2	0.105	370.2	0.226	370.2	0.138	370.2	0.027
1853	370.4	0.105	370.4	0.226	370.4	0.137	370.4	0.027
1854	370.6	0.105	370.6	0.226	370.6	0.137	370.6	0.026
1855	370.8	0.105	370.8	0.225	370.8	0.137	370.8	0.026
1856	371	0.104	371	0.225	371	0.136	371	0.026
1857	371.2	0.104	371.2	0.224	371.2	0.136	371.2	0.025
1858	371.4	0.104	371.4	0.224	371.4	0.136	371.4	0.025
1859	371.6	0.104	371.6	0.223	371.6	0.135	371.6	0.025
1860	371.8	0.104	371.8	0.223	371.8	0.135	371.8	0.024
1861	372	0.103	372	0.222	372	0.135	372	0.023
1862	372.2	0.103	372.2	0.221	372.2	0.135	372.2	0.023
1863	372.4	0.102	372.4	0.221	372.4	0.135	372.4	0.022
1864	372.6	0.102	372.6	0.221	372.6	0.135	372.6	0.022
1865	372.8	0.102	372.8	0.22	372.8	0.135	372.8	0.021
1866	373	0.101	373	0.22	373	0.135	373	0.021
1867	373.2	0.101	373.2	0.22	373.2	0.135	373.2	0.021
1868	373.4	0.101	373.4	0.22	373.4	0.135	373.4	0.021
1869	373.6	0.1	373.6	0.22	373.6	0.135	373.6	0.021
1870	373.8	0.1	373.8	0.22	373.8	0.135	373.8	0.021
1871	374	0.1	374	0.22	374	0.135	374	0.021
1872	374.2	0.1	374.2	0.22	374.2	0.135	374.2	0.022
1873	374.4	0.099	374.4	0.22	374.4	0.135	374.4	0.022
1874	374.6	0.099	374.6	0.22	374.6	0.135	374.6	0.022
1875	374.8	0.099	374.8	0.22	374.8	0.135	374.8	0.022
1876	375	0.099	375	0.22	375	0.135	375	0.022
1877	375.2	0.098	375.2	0.22	375.2	0.134	375.2	0.022
1878	375.4	0.098	375.4	0.219	375.4	0.134	375.4	0.022
1879	375.6	0.098	375.6	0.219	375.6	0.133	375.6	0.022
1880	375.8	0.098	375.8	0.219	375.8	0.133	375.8	0.022
1881	376	0.098	376	0.218	376	0.133	376	0.022
1882	376.2	0.098	376.2	0.218	376.2	0.133	376.2	0.021
1883	376.4	0.098	376.4	0.218	376.4	0.133	376.4	0.021
1884	376.6	0.098	376.6	0.218	376.6	0.133	376.6	0.021
1885	376.8	0.098	376.8	0.217	376.8	0.132	376.8	0.021
1886	377	0.098	377	0.217	377	0.132	377	0.021
1887	377.2	0.098	377.2	0.217	377.2	0.132	377.2	0.021
1888	377.4	0.098	377.4	0.216	377.4	0.131	377.4	0.021
1889	377.6	0.098	377.6	0.216	377.6	0.131	377.6	0.02
1890	377.8	0.098	377.8	0.216	377.8	0.131	377.8	0.02
1891	378	0.098	378	0.216	378	0.131	378	0.019
1892	378.2	0.097	378.2	0.216	378.2	0.131	378.2	0.018
1893	378.4	0.097	378.4	0.217	378.4	0.131	378.4	0.018
1894	378.6	0.097	378.6	0.217	378.6	0.131	378.6	0.018
1895	378.8	0.097	378.8	0.217	378.8	0.13	378.8	0.017
1896	379	0.097	379	0.217	379	0.13	379	0.017
1897	379.2	0.096	379.2	0.216	379.2	0.13	379.2	0.017
1898	379.4	0.096	379.4	0.216	379.4	0.129	379.4	0.017
1899	379.6	0.096	379.6	0.216	379.6	0.129	379.6	0.017
1900	379.8	0.095	379.8	0.215	379.8	0.129	379.8	0.017
1901	380	0.095	380	0.215	380	0.129	380	0.017
1902	380.2	0.094	380.2	0.215	380.2	0.128	380.2	0.017
1903	380.4	0.094	380.4	0.214	380.4	0.128	380.4	0.017
1904	380.6	0.093	380.6	0.214	380.6	0.128	380.6	0.017
1905	380.8	0.093	380.8	0.213	380.8	0.128	380.8	0.017
1906	381	0.093	381	0.213	381	0.128	381	0.017
1907	381.2	0.093	381.2	0.213	381.2	0.128	381.2	0.017
1908	381.4	0.093	381.4	0.212	381.4	0.128	381.4	0.017
1909	381.6	0.093	381.6	0.212	381.6	0.128	381.6	0.016
1910	381.8	0.093	381.8	0.212	381.8	0.129	381.8	0.016
1911	382	0.093	382	0.212	382	0.129	382	0.016
1912	382.2	0.093	382.2	0.212	382.2	0.129	382.2	0.016
1913	382.4	0.093	382.4	0.212	382.4	0.129	382.4	0.016
1914	382.6	0.093	382.6	0.212	382.6	0.129	382.6	0.016
1915	382.8	0.094	382.8	0.212	382.8	0.129	382.8	0.016
1916	383	0.094	383	0.212	383	0.129	383	0.016
1917	383.2	0.094	383.2	0.212	383.2	0.129	383.2	0.016
1918	383.4	0.093	383.4	0.212	383.4	0.129	383.4	0.017
1919	383.6	0.093	383.6	0.212	383.6	0.129	383.6	0.016
1920	383.8	0.093	383.8	0.212	383.8	0.128	383.8	0.016
1921	384	0.092	384	0.213	384	0.128	384	0.016
1922	384.2	0.092	384.2	0.212	384.2	0.128	384.2	0.016
1923	384.4	0.092	384.4	0.212	384.4	0.128	384.4	0.015
1924	384.6	0.091	384.6	0.212	384.6	0.127	384.6	0.015
1925	384.8	0.091	384.8	0.212	384.8	0.127	384.8	0.015
1926	385	0.091	385	0.211	385	0.127	385	0.015
1927	385.2	0.09	385.2	0.211	385.2	0.126	385.2	0.015
1928	385.4	0.09	385.4	0.211	385.4	0.126	385.4	0.015
1929	385.6	0.09	385.6	0.21	385.6	0.125	385.6	0.015
1930	385.8	0.09	385.8	0.21	385.8	0.125	385.8	0.014
1931	386	0.089	386	0.21	386	0.125	386	0.014
1932	386.2	0.089	386.2	0.209	386.2	0.125	386.2	0.013
1933	386.4	0.089	386.4	0.209	386.4	0.125	386.4	0.013
1934	386.6	0.089	386.6	0.209	386.6	0.125	386.6	0.013
1935	386.8	0.089	386.8	0.209	386.8	0.125	386.8	0.013
1936	387	0.09	387	0.209	387	0.125	387	0.013
1937	387.2	0.09	387.2	0.209	387.2	0.124	387.2	0.013
1938	387.4	0.09	387.4	0.209	387.4	0.124	387.4	0.012
1939	387.6	0.089	387.6	0.209	387.6	0.124	387.6	0.012
1940	387.8	0.089	387.8	0.209	387.8	0.125	387.8	0.011
1941	388	0.089	388	0.21	388	0.125	388	0.01
1942	388.2	0.088	388.2	0.21	388.2	0.125	388.2	0.01
1943	388.4	0.088	388.4	0.21	388.4	0.125	388.4	0.009
1944	388.6	0.088	388.6	0.209	388.6	0.125	388.6	0.009
1945	388.8	0.087	388.8	0.209	388.8	0.125	388.8	0.009
1946	389	0.087	389	0.208	389	0.125	389	0.01
1947	389.2	0.087	389.2	0.208	389.2	0.125	389.2	0.01
1948	389.4	0.086	389.4	0.208	389.4	0.124	389.4	0.01
1949	389.6	0.086	389.6	0.207	389.6	0.124	389.6	0.01
1950	389.8	0.086	389.8	0.207	389.8	0.124	389.8	0.011
1951	390	0.086	390	0.207	390	0.124	390	0.011
1952	390.2	0.086	390.2	0.207	390.2	0.124	390.2	0.012
1953	390.4	0.085	390.4	0.207	390.4	0.123	390.4	0.012
1954	390.6	0.085	390.6	0.207	390.6	0.123	390.6	0.012
1955	390.8	0.085	390.8	0.206	390.8	0.123	390.8	0.012
1956	391	0.085	391	0.206	391	0.123	391	0.012
1957	391.2	0.085	391.2	0.206	391.2	0.122	391.2	0.012
1958	391.4	0.085	391.4	0.206	391.4	0.122	391.4	0.011
1959	391.6	0.085	391.6	0.206	391.6	0.122	391.6	0.011
1960	391.8	0.085	391.8	0.206	391.8	0.122	391.8	0.01
1961	392	0.085	392	0.206	392	0.122	392	0.009
1962	392.2	0.085	392.2	0.205	392.2	0.121	392.2	0.009
1963	392.4	0.085	392.4	0.205	392.4	0.121	392.4	0.009
1964	392.6	0.085	392.6	0.205	392.6	0.121	392.6	0.009
1965	392.8	0.084	392.8	0.205	392.8	0.121	392.8	0.009
1966	393	0.084	393	0.204	393	0.121	393	0.009
1967	393.2	0.084	393.2	0.204	393.2	0.12	393.2	0.009
1968	393.4	0.083	393.4	0.204	393.4	0.12	393.4	0.009
1969	393.6	0.083	393.6	0.204	393.6	0.12	393.6	0.009
1970	393.8	0.083	393.8	0.204	393.8	0.12	393.8	0.009
1971	394	0.082	394	0.204	394	0.12	394	0.009
1972	394.2	0.082	394.2	0.204	394.2	0.12	394.2	0.009
1973	394.4	0.082	394.4	0.204	394.4	0.12	394.4	0.009
1974	394.6	0.082	394.6	0.204	394.6	0.12	394.6	0.009
1975	394.8	0.082	394.8	0.204	394.8	0.12	394.8	0.01
1976	395	0.082	395	0.204	395	0.121	395	0.01
1977	395.2	0.082	395.2	0.204	395.2	0.121	395.2	0.01
1978	395.4	0.083	395.4	0.204	395.4	0.121	395.4	0.011
1979	395.6	0.083	395.6	0.204	395.6	0.121	395.6	0.011
1980	395.8	0.083	395.8	0.204	395.8	0.12	395.8	0.01
1981	396	0.084	396	0.204	396	0.12	396	0.01
1982	396.2	0.084	396.2	0.204	396.2	0.12	396.2	0.01
1983	396.4	0.083	396.4	0.204	396.4	0.12	396.4	0.01
1984	396.6	0.083	396.6	0.204	396.6	0.12	396.6	0.009
1985	396.8	0.083	396.8	0.203	396.8	0.12	396.8	0.009
1986	397	0.082	397	0.203	397	0.12	397	0.009
1987	397.2	0.081	397.2	0.203	397.2	0.119	397.2	0.008
1988	397.4	0.081	397.4	0.202	397.4	0.119	397.4	0.008
1989	397.6	0.08	397.6	0.202	397.6	0.119	397.6	0.008
1990	397.8	0.079	397.8	0.202	397.8	0.118	397.8	0.008
1991	398	0.079	398	0.201	398	0.118	398	0.008
1992	398.2	0.078	398.2	0.201	398.2	0.118	398.2	0.008
1993	398.4	0.078	398.4	0.201	398.4	0.118	398.4	0.009
1994	398.6	0.078	398.6	0.201	398.6	0.118	398.6	0.009
1995	398.8	0.078	398.8	0.201	398.8	0.117	398.8	0.009
1996	399	0.079	399	0.201	399	0.117	399	0.01
1997	399.2	0.079	399.2	0.201	399.2	0.117	399.2	0.009
1998	399.4	0.079	399.4	0.201	399.4	0.117	399.4	0.009
1999	399.6	0.08	399.6	0.202	399.6	0.117	399.6	0.008
[truncated: 1,151 more rows]

## Sheet: Fig4B Supl2
		5 uM NCS1		50 uM RIC8AP3
1	0	0.02	0	0.016
2	0.2	0.02	0.2	0.016
3	0.4	0.02	0.4	0.016
4	0.6	0.02	0.6	0.016
5	0.8	0.02	0.8	0.016
6	1	0.02	1	0.015
7	1.2	0.02	1.2	0.015
8	1.4	0.02	1.4	0.015
9	1.6	0.02	1.6	0.015
10	1.8	0.02	1.8	0.015
11	2	0.02	2	0.015
12	2.2	0.02	2.2	0.015
13	2.4	0.02	2.4	0.015
14	2.6	0.019	2.6	0.014
15	2.8	0.019	2.8	0.014
16	3	0.019	3	0.014
17	3.2	0.018	3.2	0.014
18	3.4	0.018	3.4	0.014
19	3.6	0.018	3.6	0.014
20	3.8	0.018	3.8	0.013
21	4	0.018	4	0.013
22	4.2	0.017	4.2	0.013
23	4.4	0.017	4.4	0.013
24	4.6	0.017	4.6	0.012
25	4.8	0.017	4.8	0.012
26	5	0.017	5	0.012
27	5.2	0.017	5.2	0.012
28	5.4	0.017	5.4	0.012
29	5.6	0.017	5.6	0.012
30	5.8	0.017	5.8	0.012
31	6	0.017	6	0.012
32	6.2	0.017	6.2	0.012
33	6.4	0.017	6.4	0.012
34	6.6	0.017	6.6	0.013
35	6.8	0.016	6.8	0.013
36	7	0.016	7	0.013
37	7.2	0.016	7.2	0.013
38	7.4	0.016	7.4	0.013
39	7.6	0.016	7.6	0.012
40	7.8	0.015	7.8	0.012
41	8	0.015	8	0.012
42	8.2	0.015	8.2	0.011
43	8.4	0.015	8.4	0.011
44	8.6	0.015	8.6	0.011
45	8.8	0.014	8.8	0.01
46	9	0.014	9	0.01
47	9.2	0.014	9.2	0.01
48	9.4	0.013	9.4	0.01
49	9.6	0.013	9.6	0.01
50	9.8	0.013	9.8	0.009
51	10	0.013	10	0.009
52	10.2	0.012	10.2	0.009
53	10.4	0.012	10.4	0.009
54	10.6	0.011	10.6	0.008
55	10.8	0.011	10.8	0.008
56	11	0.01	11	0.008
57	11.2	0.01	11.2	0.008
58	11.4	0.01	11.4	0.008
59	11.6	0.009	11.6	0.008
60	11.8	0.009	11.8	0.007
61	12	0.009	12	0.007
62	12.2	0.009	12.2	0.007
63	12.4	0.009	12.4	0.007
64	12.6	0.009	12.6	0.007
65	12.8	0.009	12.8	0.007
66	13	0.009	13	0.007
67	13.2	0.009	13.2	0.007
68	13.4	0.009	13.4	0.007
69	13.6	0.009	13.6	0.007
70	13.8	0.009	13.8	0.007
71	14	0.009	14	0.007
72	14.2	0.009	14.2	0.007
73	14.4	0.009	14.4	0.007
74	14.6	0.008	14.6	0.007
75	14.8	0.008	14.8	0.007
76	15	0.007	15	0.006
77	15.2	0.007	15.2	0.006
78	15.4	0.006	15.4	0.006
79	15.6	0.006	15.6	0.006
80	15.8	0.006	15.8	0.006
81	16	0.006	16	0.006
82	16.2	0.006	16.2	0.006
83	16.4	0.006	16.4	0.006
84	16.6	0.006	16.6	0.005
85	16.8	0.006	16.8	0.005
86	17	0.006	17	0.005
87	17.2	0.006	17.2	0.005
88	17.4	0.006	17.4	0.005
89	17.6	0.006	17.6	0.005
90	17.8	0.006	17.8	0.005
91	18	0.006	18	0.004
92	18.2	0.006	18.2	0.004
93	18.4	0.006	18.4	0.004
94	18.6	0.006	18.6	0.004
95	18.8	0.005	18.8	0.003
96	19	0.005	19	0.003
97	19.2	0.005	19.2	0.003
98	19.4	0.005	19.4	0.003
99	19.6	0.005	19.6	0.003
100	19.8	0.005	19.8	0.003
101	20	0.005	20	0.003
102	20.2	0.004	20.2	0.003
103	20.4	0.004	20.4	0.003
104	20.6	0.004	20.6	0.003
105	20.8	0.003	20.8	0.004
106	21	0.003	21	0.004
107	21.2	0.003	21.2	0.004
108	21.4	0.002	21.4	0.004
109	21.6	0.002	21.6	0.004
110	21.8	0.002	21.8	0.004
111	22	0.002	22	0.003
112	22.2	0.002	22.2	0.003
113	22.4	0.003	22.4	0.003
114	22.6	0.003	22.6	0.003
115	22.8	0.003	22.8	0.003
116	23	0.003	23	0.002
117	23.2	0.002	23.2	0.002
118	23.4	0.002	23.4	0.002
119	23.6	0.002	23.6	0.002
120	23.8	0.002	23.8	0.002
121	24	0.002	24	0.002
122	24.2	0.002	24.2	0.002
123	24.4	0.001	24.4	0.002
124	24.6	0.001	24.6	0.002
125	24.8	0.001	24.8	0.001
126	25	0.001	25	0.001
127	25.2	0.001	25.2	0
128	25.4	0.001	25.4	0
129	25.6	0.001	25.6	0
130	25.8	0.001	25.8	0
131	26	0.001	26	0
132	26.2	0.001	26.2	0
133	26.4	0.001	26.4	0
134	26.6	0.001	26.6	0
135	26.8	0	26.8	0
136	27	0	27	0
137	27.2	0	27.2	0.001
138	27.4	0	27.4	0.001
139	27.6	0	27.6	0.001
140	27.8	0	27.8	0.001
141	28	0	28	0.001
142	28.2	0	28.2	0.001
143	28.4	0	28.4	0
144	28.6	0	28.6	0
145	28.8	0	28.8	0
146	29	0	29	-0.001
147	29.2	0	29.2	-0.001
148	29.4	-0.001	29.4	-0.001
149	29.6	-0.001	29.6	-0.001
150	29.8	-0.001	29.8	-0.001
151	30	0	30	-0.032
152	30.2	0.009	30.2	-0.027
153	30.4	0.019	30.4	-0.02
154	30.6	0.031	30.6	-0.014
155	30.8	0.044	30.8	-0.009
156	31	0.058	31	-0.003
157	31.2	0.072	31.2	0.001
158	31.4	0.087	31.4	0.005
159	31.6	0.102	31.6	0.008
160	31.8	0.116	31.8	0.009
161	32	0.129	32	0.009
162	32.2	0.141	32.2	0.008
163	32.4	0.152	32.4	0.007
164	32.6	0.164	32.6	0.007
165	32.8	0.174	32.8	0.007
166	33	0.185	33	0.006
167	33.2	0.195	33.2	0.006
168	33.4	0.206	33.4	0.006
169	33.6	0.216	33.6	0.006
170	33.8	0.226	33.8	0.006
171	34	0.236	34	0.006
172	34.2	0.245	34.2	0.007
173	34.4	0.255	34.4	0.007
174	34.6	0.264	34.6	0.007
175	34.8	0.274	34.8	0.007
176	35	0.283	35	0.007
177	35.2	0.293	35.2	0.007
178	35.4	0.302	35.4	0.006
179	35.6	0.311	35.6	0.006
180	35.8	0.32	35.8	0.006
181	36	0.329	36	0.006
182	36.2	0.337	36.2	0.006
183	36.4	0.345	36.4	0.006
184	36.6	0.354	36.6	0.006
185	36.8	0.362	36.8	0.006
186	37	0.37	37	0.006
187	37.2	0.378	37.2	0.006
188	37.4	0.386	37.4	0.006
189	37.6	0.394	37.6	0.006
190	37.8	0.402	37.8	0.006
191	38	0.41	38	0.006
192	38.2	0.417	38.2	0.006
193	38.4	0.425	38.4	0.006
194	38.6	0.432	38.6	0.006
195	38.8	0.44	38.8	0.006
196	39	0.447	39	0.006
197	39.2	0.454	39.2	0.006
198	39.4	0.462	39.4	0.006
199	39.6	0.469	39.6	0.006
200	39.8	0.476	39.8	0.007
201	40	0.483	40	0.007
202	40.2	0.489	40.2	0.008
203	40.4	0.496	40.4	0.008
204	40.6	0.503	40.6	0.009
205	40.8	0.51	40.8	0.01
206	41	0.517	41	0.01
207	41.2	0.523	41.2	0.01
208	41.4	0.53	41.4	0.01
209	41.6	0.537	41.6	0.011
210	41.8	0.543	41.8	0.01
211	42	0.549	42	0.01
212	42.2	0.556	42.2	0.01
213	42.4	0.562	42.4	0.01
214	42.6	0.568	42.6	0.01
215	42.8	0.574	42.8	0.01
216	43	0.581	43	0.01
217	43.2	0.587	43.2	0.01
218	43.4	0.592	43.4	0.01
219	43.6	0.598	43.6	0.01
220	43.8	0.604	43.8	0.01
221	44	0.61	44	0.01
222	44.2	0.616	44.2	0.01
223	44.4	0.622	44.4	0.01
224	44.6	0.627	44.6	0.01
225	44.8	0.633	44.8	0.01
226	45	0.639	45	0.01
227	45.2	0.644	45.2	0.01
228	45.4	0.65	45.4	0.009
229	45.6	0.655	45.6	0.009
230	45.8	0.661	45.8	0.009
231	46	0.666	46	0.009
232	46.2	0.672	46.2	0.009
233	46.4	0.677	46.4	0.009
234	46.6	0.683	46.6	0.009
235	46.8	0.689	46.8	0.01
236	47	0.694	47	0.01
237	47.2	0.699	47.2	0.011
238	47.4	0.705	47.4	0.011
239	47.6	0.71	47.6	0.012
240	47.8	0.716	47.8	0.012
241	48	0.721	48	0.012
242	48.2	0.727	48.2	0.012
243	48.4	0.733	48.4	0.012
244	48.6	0.739	48.6	0.012
245	48.8	0.744	48.8	0.012
246	49	0.75	49	0.012
247	49.2	0.756	49.2	0.011
248	49.4	0.761	49.4	0.011
249	49.6	0.766	49.6	0.011
250	49.8	0.772	49.8	0.011
251	50	0.777	50	0.011
252	50.2	0.782	50.2	0.011
253	50.4	0.787	50.4	0.011
254	50.6	0.791	50.6	0.012
255	50.8	0.796	50.8	0.012
256	51	0.801	51	0.012
257	51.2	0.805	51.2	0.012
258	51.4	0.81	51.4	0.013
259	51.6	0.815	51.6	0.013
260	51.8	0.82	51.8	0.013
261	52	0.825	52	0.013
262	52.2	0.83	52.2	0.013
263	52.4	0.834	52.4	0.013
264	52.6	0.839	52.6	0.013
265	52.8	0.844	52.8	0.013
266	53	0.848	53	0.013
267	53.2	0.853	53.2	0.013
268	53.4	0.858	53.4	0.012
269	53.6	0.862	53.6	0.012
270	53.8	0.867	53.8	0.012
271	54	0.871	54	0.012
272	54.2	0.876	54.2	0.012
273	54.4	0.88	54.4	0.013
274	54.6	0.885	54.6	0.013
275	54.8	0.889	54.8	0.013
276	55	0.894	55	0.013
277	55.2	0.898	55.2	0.012
278	55.4	0.903	55.4	0.012
279	55.6	0.907	55.6	0.012
280	55.8	0.912	55.8	0.012
281	56	0.916	56	0.012
282	56.2	0.92	56.2	0.012
283	56.4	0.925	56.4	0.012
284	56.6	0.929	56.6	0.013
285	56.8	0.934	56.8	0.013
286	57	0.938	57	0.013
287	57.2	0.942	57.2	0.013
288	57.4	0.947	57.4	0.014
289	57.6	0.951	57.6	0.014
290	57.8	0.955	57.8	0.014
291	58	0.959	58	0.014
292	58.2	0.964	58.2	0.014
293	58.4	0.968	58.4	0.014
294	58.6	0.972	58.6	0.015
295	58.8	0.976	58.8	0.015
296	59	0.98	59	0.015
297	59.2	0.984	59.2	0.015
298	59.4	0.988	59.4	0.015
299	59.6	0.992	59.6	0.015
300	59.8	0.996	59.8	0.015
301	60	1.001	60	0.015
302	60.2	1.005	60.2	0.015
303	60.4	1.009	60.4	0.015
304	60.6	1.013	60.6	0.016
305	60.8	1.017	60.8	0.016
306	61	1.021	61	0.016
307	61.2	1.026	61.2	0.016
308	61.4	1.03	61.4	0.015
309	61.6	1.034	61.6	0.015
310	61.8	1.038	61.8	0.015
311	62	1.043	62	0.015
312	62.2	1.047	62.2	0.016
313	62.4	1.051	62.4	0.016
314	62.6	1.055	62.6	0.016
315	62.8	1.059	62.8	0.016
316	63	1.063	63	0.017
317	63.2	1.067	63.2	0.017
318	63.4	1.071	63.4	0.017
319	63.6	1.074	63.6	0.018
320	63.8	1.078	63.8	0.018
321	64	1.082	64	0.018
322	64.2	1.086	64.2	0.018
323	64.4	1.09	64.4	0.019
324	64.6	1.094	64.6	0.019
325	64.8	1.097	64.8	0.018
326	65	1.101	65	0.018
327	65.2	1.105	65.2	0.018
328	65.4	1.109	65.4	0.018
329	65.6	1.113	65.6	0.017
330	65.8	1.117	65.8	0.017
331	66	1.121	66	0.017
332	66.2	1.124	66.2	0.017
333	66.4	1.128	66.4	0.017
334	66.6	1.132	66.6	0.017
335	66.8	1.136	66.8	0.017
336	67	1.139	67	0.017
337	67.2	1.143	67.2	0.017
338	67.4	1.146	67.4	0.017
339	67.6	1.149	67.6	0.018
340	67.8	1.153	67.8	0.018
341	68	1.156	68	0.018
342	68.2	1.16	68.2	0.018
343	68.4	1.163	68.4	0.018
344	68.6	1.167	68.6	0.018
345	68.8	1.17	68.8	0.018
346	69	1.173	69	0.018
347	69.2	1.176	69.2	0.018
348	69.4	1.179	69.4	0.018
349	69.6	1.183	69.6	0.018
350	69.8	1.186	69.8	0.018
351	70	1.19	70	0.018
352	70.2	1.193	70.2	0.018
353	70.4	1.196	70.4	0.018
354	70.6	1.2	70.6	0.018
355	70.8	1.203	70.8	0.019
356	71	1.207	71	0.019
357	71.2	1.21	71.2	0.02
358	71.4	1.214	71.4	0.02
359	71.6	1.218	71.6	0.021
360	71.8	1.221	71.8	0.021
361	72	1.225	72	0.021
362	72.2	1.228	72.2	0.021
363	72.4	1.232	72.4	0.021
364	72.6	1.236	72.6	0.021
365	72.8	1.239	72.8	0.021
366	73	1.242	73	0.021
367	73.2	1.246	73.2	0.021
368	73.4	1.249	73.4	0.02
369	73.6	1.252	73.6	0.02
370	73.8	1.255	73.8	0.02
371	74	1.258	74	0.02
372	74.2	1.261	74.2	0.02
373	74.4	1.264	74.4	0.02
374	74.6	1.267	74.6	0.02
375	74.8	1.27	74.8	0.02
376	75	1.273	75	0.02
377	75.2	1.276	75.2	0.02
378	75.4	1.28	75.4	0.02
379	75.6	1.284	75.6	0.02
380	75.8	1.287	75.8	0.02
381	76	1.291	76	0.02
382	76.2	1.295	76.2	0.02
383	76.4	1.298	76.4	0.02
384	76.6	1.301	76.6	0.02
385	76.8	1.304	76.8	0.02
386	77	1.308	77	0.02
387	77.2	1.311	77.2	0.019
388	77.4	1.314	77.4	0.019
389	77.6	1.317	77.6	0.019
390	77.8	1.32	77.8	0.019
391	78	1.323	78	0.019
392	78.2	1.326	78.2	0.019
393	78.4	1.329	78.4	0.02
394	78.6	1.332	78.6	0.02
395	78.8	1.335	78.8	0.02
396	79	1.338	79	0.02
397	79.2	1.341	79.2	0.02
398	79.4	1.344	79.4	0.021
399	79.6	1.347	79.6	0.021
400	79.8	1.35	79.8	0.021
401	80	1.353	80	0.021
402	80.2	1.356	80.2	0.021
403	80.4	1.359	80.4	0.022
404	80.6	1.362	80.6	0.022
405	80.8	1.365	80.8	0.022
406	81	1.368	81	0.022
407	81.2	1.372	81.2	0.022
408	81.4	1.375	81.4	0.022
409	81.6	1.379	81.6	0.022
410	81.8	1.382	81.8	0.022
411	82	1.385	82	0.022
412	82.2	1.387	82.2	0.022
413	82.4	1.39	82.4	0.022
414	82.6	1.392	82.6	0.022
415	82.8	1.395	82.8	0.022
416	83	1.398	83	0.022
417	83.2	1.401	83.2	0.022
418	83.4	1.403	83.4	0.022
419	83.6	1.406	83.6	0.022
420	83.8	1.409	83.8	0.022
421	84	1.411	84	0.022
422	84.2	1.414	84.2	0.022
423	84.4	1.417	84.4	0.023
424	84.6	1.42	84.6	0.023
425	84.8	1.423	84.8	0.023
426	85	1.426	85	0.024
427	85.2	1.429	85.2	0.024
428	85.4	1.432	85.4	0.024
429	85.6	1.435	85.6	0.024
430	85.8	1.438	85.8	0.024
431	86	1.44	86	0.024
432	86.2	1.443	86.2	0.025
433	86.4	1.446	86.4	0.025
434	86.6	1.449	86.6	0.025
435	86.8	1.452	86.8	0.025
436	87	1.455	87	0.024
437	87.2	1.458	87.2	0.024
438	87.4	1.46	87.4	0.024
439	87.6	1.463	87.6	0.024
440	87.8	1.465	87.8	0.024
441	88	1.468	88	0.024
442	88.2	1.47	88.2	0.024
443	88.4	1.473	88.4	0.024
444	88.6	1.476	88.6	0.025
445	88.8	1.478	88.8	0.025
446	89	1.481	89	0.025
447	89.2	1.483	89.2	0.024
448	89.4	1.486	89.4	0.024
449	89.6	1.489	89.6	0.024
450	89.8	1.492	89.8	0.024
451	90	1.495	90	0.024
452	90.2	1.498	90.2	0.024
453	90.4	1.5	90.4	0.024
454	90.6	1.503	90.6	0.024
455	90.8	1.505	90.8	0.023
456	91	1.508	91	0.023
457	91.2	1.511	91.2	0.023
458	91.4	1.513	91.4	0.022
459	91.6	1.516	91.6	0.022
460	91.8	1.519	91.8	0.022
461	92	1.522	92	0.023
462	92.2	1.524	92.2	0.023
463	92.4	1.527	92.4	0.024
464	92.6	1.529	92.6	0.024
465	92.8	1.532	92.8	0.025
466	93	1.534	93	0.025
467	93.2	1.537	93.2	0.026
468	93.4	1.54	93.4	0.026
469	93.6	1.543	93.6	0.026
470	93.8	1.545	93.8	0.027
471	94	1.548	94	0.027
472	94.2	1.551	94.2	0.027
473	94.4	1.554	94.4	0.027
474	94.6	1.556	94.6	0.026
475	94.8	1.559	94.8	0.026
476	95	1.561	95	0.026
477	95.2	1.564	95.2	0.025
478	95.4	1.566	95.4	0.026
479	95.6	1.569	95.6	0.026
480	95.8	1.571	95.8	0.026
481	96	1.573	96	0.027
482	96.2	1.575	96.2	0.027
483	96.4	1.576	96.4	0.028
484	96.6	1.578	96.6	0.028
485	96.8	1.581	96.8	0.028
486	97	1.583	97	0.028
487	97.2	1.586	97.2	0.028
488	97.4	1.588	97.4	0.028
489	97.6	1.591	97.6	0.029
490	97.8	1.593	97.8	0.028
491	98	1.596	98	0.028
492	98.2	1.598	98.2	0.027
493	98.4	1.601	98.4	0.027
494	98.6	1.604	98.6	0.026
495	98.8	1.606	98.8	0.026
496	99	1.609	99	0.026
497	99.2	1.611	99.2	0.027
498	99.4	1.613	99.4	0.027
499	99.6	1.616	99.6	0.027
500	99.8	1.618	99.8	0.027
501	100	1.62	100	0.028
502	100.2	1.622	100.2	0.028
503	100.4	1.625	100.4	0.028
504	100.6	1.627	100.6	0.028
505	100.8	1.63	100.8	0.029
506	101	1.633	101	0.029
507	101.2	1.635	101.2	0.029
508	101.4	1.638	101.4	0.029
509	101.6	1.641	101.6	0.029
510	101.8	1.644	101.8	0.029
511	102	1.646	102	0.029
512	102.2	1.649	102.2	0.029
513	102.4	1.651	102.4	0.029
514	102.6	1.654	102.6	0.029
515	102.8	1.656	102.8	0.029
516	103	1.658	103	0.029
517	103.2	1.66	103.2	0.029
518	103.4	1.663	103.4	0.029
519	103.6	1.665	103.6	0.029
520	103.8	1.667	103.8	0.029
521	104	1.669	104	0.029
522	104.2	1.671	104.2	0.029
523	104.4	1.674	104.4	0.029
524	104.6	1.676	104.6	0.029
525	104.8	1.678	104.8	0.029
526	105	1.68	105	0.029
527	105.2	1.683	105.2	0.029
528	105.4	1.685	105.4	0.029
529	105.6	1.687	105.6	0.029
530	105.8	1.689	105.8	0.029
531	106	1.692	106	0.03
532	106.2	1.694	106.2	0.03
533	106.4	1.696	106.4	0.03
534	106.6	1.698	106.6	0.03
535	106.8	1.7	106.8	0.029
536	107	1.702	107	0.029
537	107.2	1.705	107.2	0.029
538	107.4	1.707	107.4	0.029
539	107.6	1.709	107.6	0.029
540	107.8	1.712	107.8	0.029
541	108	1.714	108	0.029
542	108.2	1.717	108.2	0.029
543	108.4	1.719	108.4	0.029
544	108.6	1.722	108.6	0.029
545	108.8	1.724	108.8	0.029
546	109	1.726	109	0.029
547	109.2	1.729	109.2	0.029
548	109.4	1.731	109.4	0.029
549	109.6	1.733	109.6	0.029
550	109.8	1.735	109.8	0.029
551	110	1.738	110	0.029
552	110.2	1.74	110.2	0.03
553	110.4	1.742	110.4	0.03
554	110.6	1.744	110.6	0.03
555	110.8	1.746	110.8	0.031
556	111	1.748	111	0.031
557	111.2	1.75	111.2	0.032
558	111.4	1.752	111.4	0.032
559	111.6	1.754	111.6	0.033
560	111.8	1.756	111.8	0.033
561	112	1.758	112	0.034
562	112.2	1.76	112.2	0.034
563	112.4	1.762	112.4	0.034
564	112.6	1.763	112.6	0.034
565	112.8	1.765	112.8	0.035
566	113	1.767	113	0.035
567	113.2	1.769	113.2	0.035
568	113.4	1.771	113.4	0.035
569	113.6	1.773	113.6	0.035
570	113.8	1.775	113.8	0.035
571	114	1.778	114	0.035
572	114.2	1.78	114.2	0.034
573	114.4	1.782	114.4	0.034
574	114.6	1.784	114.6	0.034
575	114.8	1.787	114.8	0.033
576	115	1.789	115	0.033
577	115.2	1.791	115.2	0.033
578	115.4	1.793	115.4	0.033
579	115.6	1.795	115.6	0.033
580	115.8	1.797	115.8	0.033
581	116	1.799	116	0.033
582	116.2	1.801	116.2	0.033
583	116.4	1.803	116.4	0.033
584	116.6	1.805	116.6	0.033
585	116.8	1.807	116.8	0.034
586	117	1.809	117	0.034
587	117.2	1.811	117.2	0.034
588	117.4	1.813	117.4	0.034
589	117.6	1.815	117.6	0.034
590	117.8	1.817	117.8	0.034
591	118	1.819	118	0.034
592	118.2	1.821	118.2	0.034
593	118.4	1.823	118.4	0.034
594	118.6	1.825	118.6	0.034
595	118.8	1.827	118.8	0.034
596	119	1.829	119	0.034
597	119.2	1.831	119.2	0.034
598	119.4	1.833	119.4	0.034
599	119.6	1.835	119.6	0.034
600	119.8	1.837	119.8	0.034
601	120	1.839	120	0.034
602	120.2	1.841	120.2	0.034
603	120.4	1.843	120.4	0.034
604	120.6	1.845	120.6	0.034
605	120.8	1.847	120.8	0.034
606	121	1.849	121	0.034
607	121.2	1.851	121.2	0.034
608	121.4	1.852	121.4	0.034
609	121.6	1.854	121.6	0.035
610	121.8	1.856	121.8	0.035
611	122	1.858	122	0.035
612	122.2	1.86	122.2	0.035
613	122.4	1.861	122.4	0.035
614	122.6	1.863	122.6	0.035
615	122.8	1.865	122.8	0.036
616	123	1.867	123	0.035
617	123.2	1.869	123.2	0.035
618	123.4	1.872	123.4	0.035
619	123.6	1.874	123.6	0.035
620	123.8	1.876	123.8	0.035
621	124	1.878	124	0.035
622	124.2	1.88	124.2	0.035
623	124.4	1.882	124.4	0.034
624	124.6	1.884	124.6	0.034
625	124.8	1.885	124.8	0.034
626	125	1.887	125	0.034
627	125.2	1.889	125.2	0.034
628	125.4	1.891	125.4	0.035
629	125.6	1.893	125.6	0.035
630	125.8	1.895	125.8	0.035
631	126	1.896	126	0.036
632	126.2	1.898	126.2	0.036
633	126.4	1.9	126.4	0.036
634	126.6	1.902	126.6	0.036
635	126.8	1.904	126.8	0.037
636	127	1.906	127	0.037
637	127.2	1.908	127.2	0.037
638	127.4	1.91	127.4	0.037
639	127.6	1.912	127.6	0.037
640	127.8	1.914	127.8	0.037
641	128	1.916	128	0.037
642	128.2	1.918	128.2	0.037
643	128.4	1.92	128.4	0.037
644	128.6	1.922	128.6	0.037
645	128.8	1.923	128.8	0.037
646	129	1.925	129	0.038
647	129.2	1.927	129.2	0.038
648	129.4	1.929	129.4	0.038
649	129.6	1.93	129.6	0.038
650	129.8	1.932	129.8	0.038
651	130	1.933	130	0.038
652	130.2	1.935	130.2	0.038
653	130.4	1.937	130.4	0.038
654	130.6	1.938	130.6	0.038
655	130.8	1.94	130.8	0.038
656	131	1.942	131	0.038
657	131.2	1.943	131.2	0.038
658	131.4	1.945	131.4	0.038
659	131.6	1.947	131.6	0.038
660	131.8	1.949	131.8	0.038
661	132	1.951	132	0.038
662	132.2	1.952	132.2	0.038
663	132.4	1.954	132.4	0.038
664	132.6	1.956	132.6	0.038
665	132.8	1.959	132.8	0.038
666	133	1.961	133	0.038
667	133.2	1.962	133.2	0.038
668	133.4	1.964	133.4	0.038
669	133.6	1.967	133.6	0.038
670	133.8	1.969	133.8	0.039
671	134	1.971	134	0.039
672	134.2	1.972	134.2	0.039
673	134.4	1.974	134.4	0.039
674	134.6	1.976	134.6	0.04
675	134.8	1.977	134.8	0.04
676	135	1.979	135	0.04
677	135.2	1.98	135.2	0.04
678	135.4	1.982	135.4	0.04
679	135.6	1.983	135.6	0.04
680	135.8	1.985	135.8	0.04
681	136	1.987	136	0.041
682	136.2	1.989	136.2	0.041
683	136.4	1.991	136.4	0.041
684	136.6	1.993	136.6	0.041
685	136.8	1.995	136.8	0.041
686	137	1.997	137	0.042
687	137.2	1.998	137.2	0.042
688	137.4	2	137.4	0.042
689	137.6	2.002	137.6	0.042
690	137.8	2.004	137.8	0.042
691	138	2.006	138	0.042
692	138.2	2.008	138.2	0.042
693	138.4	2.01	138.4	0.041
694	138.6	2.012	138.6	0.041
695	138.8	2.013	138.8	0.041
696	139	2.015	139	0.041
697	139.2	2.016	139.2	0.041
698	139.4	2.017	139.4	0.041
699	139.6	2.019	139.6	0.04
700	139.8	2.021	139.8	0.041
701	140	2.022	140	0.041
702	140.2	2.024	140.2	0.041
703	140.4	2.026	140.4	0.041
704	140.6	2.027	140.6	0.041
705	140.8	2.029	140.8	0.041
706	141	2.03	141	0.041
707	141.2	2.032	141.2	0.042
708	141.4	2.033	141.4	0.042
709	141.6	2.035	141.6	0.043
710	141.8	2.037	141.8	0.043
711	142	2.039	142	0.043
712	142.2	2.041	142.2	0.043
713	142.4	2.043	142.4	0.043
714	142.6	2.045	142.6	0.043
715	142.8	2.046	142.8	0.043
716	143	2.048	143	0.043
717	143.2	2.05	143.2	0.043
718	143.4	2.052	143.4	0.043
719	143.6	2.054	143.6	0.043
720	143.8	2.055	143.8	0.043
721	144	2.057	144	0.042
722	144.2	2.059	144.2	0.042
723	144.4	2.06	144.4	0.042
724	144.6	2.061	144.6	0.041
725	144.8	2.063	144.8	0.041
726	145	2.064	145	0.041
727	145.2	2.066	145.2	0.041
728	145.4	2.067	145.4	0.042
729	145.6	2.068	145.6	0.042
730	145.8	2.07	145.8	0.042
731	146	2.071	146	0.043
732	146.2	2.072	146.2	0.043
733	146.4	2.074	146.4	0.043
734	146.6	2.075	146.6	0.043
735	146.8	2.077	146.8	0.043
736	147	2.079	147	0.043
737	147.2	2.081	147.2	0.043
738	147.4	2.082	147.4	0.043
739	147.6	2.084	147.6	0.043
740	147.8	2.086	147.8	0.043
741	148	2.088	148	0.043
742	148.2	2.09	148.2	0.043
743	148.4	2.091	148.4	0.043
744	148.6	2.093	148.6	0.043
745	148.8	2.095	148.8	0.043
746	149	2.097	149	0.044
747	149.2	2.098	149.2	0.044
748	149.4	2.1	149.4	0.045
749	149.6	2.102	149.6	0.045
750	149.8	2.103	149.8	0.045
751	150	2.104	150	0.045
752	150.2	2.105	150.2	0.045
753	150.4	2.106	150.4	0.045
754	150.6	2.108	150.6	0.045
755	150.8	2.109	150.8	0.045
756	151	2.111	151	0.044
757	151.2	2.112	151.2	0.044
758	151.4	2.114	151.4	0.044
759	151.6	2.115	151.6	0.044
760	151.8	2.117	151.8	0.044
761	152	2.118	152	0.044
762	152.2	2.12	152.2	0.044
763	152.4	2.121	152.4	0.044
764	152.6	2.123	152.6	0.045
765	152.8	2.124	152.8	0.045
766	153	2.126	153	0.045
767	153.2	2.128	153.2	0.046
768	153.4	2.13	153.4	0.046
769	153.6	2.132	153.6	0.046
770	153.8	2.133	153.8	0.047
771	154	2.135	154	0.047
772	154.2	2.136	154.2	0.047
773	154.4	2.138	154.4	0.047
774	154.6	2.139	154.6	0.047
775	154.8	2.141	154.8	0.046
776	155	2.142	155	0.046
777	155.2	2.144	155.2	0.046
778	155.4	2.145	155.4	0.046
779	155.6	2.147	155.6	0.046
780	155.8	2.148	155.8	0.046
781	156	2.149	156	0.046
782	156.2	2.15	156.2	0.047
783	156.4	2.151	156.4	0.047
784	156.6	2.153	156.6	0.046
785	156.8	2.154	156.8	0.046
786	157	2.155	157	0.046
787	157.2	2.157	157.2	0.046
788	157.4	2.158	157.4	0.046
789	157.6	2.16	157.6	0.046
790	157.8	2.162	157.8	0.046
791	158	2.164	158	0.046
792	158.2	2.166	158.2	0.046
793	158.4	2.168	158.4	0.046
794	158.6	2.17	158.6	0.047
795	158.8	2.171	158.8	0.047
796	159	2.173	159	0.047
797	159.2	2.175	159.2	0.048
798	159.4	2.177	159.4	0.048
799	159.6	2.178	159.6	0.049
800	159.8	2.18	159.8	0.049
801	160	2.181	160	0.049
802	160.2	2.183	160.2	0.049
803	160.4	2.184	160.4	0.049
804	160.6	2.186	160.6	0.049
805	160.8	2.187	160.8	0.049
806	161	2.188	161	0.049
807	161.2	2.189	161.2	0.049
808	161.4	2.19	161.4	0.049
809	161.6	2.192	161.6	0.049
810	161.8	2.193	161.8	0.049
811	162	2.194	162	0.048
812	162.2	2.196	162.2	0.049
813	162.4	2.197	162.4	0.049
814	162.6	2.198	162.6	0.049
815	162.8	2.2	162.8	0.049
816	163	2.201	163	0.05
817	163.2	2.202	163.2	0.05
818	163.4	2.204	163.4	0.05
819	163.6	2.206	163.6	0.05
820	163.8	2.207	163.8	0.05
821	164	2.209	164	0.05
822	164.2	2.21	164.2	0.05
823	164.4	2.212	164.4	0.05
824	164.6	2.213	164.6	0.05
825	164.8	2.215	164.8	0.051
826	165	2.216	165	0.051
827	165.2	2.218	165.2	0.051
828	165.4	2.219	165.4	0.05
829	165.6	2.221	165.6	0.05
830	165.8	2.222	165.8	0.05
831	166	2.224	166	0.05
832	166.2	2.225	166.2	0.049
833	166.4	2.227	166.4	0.049
834	166.6	2.228	166.6	0.049
835	166.8	2.23	166.8	0.049
836	167	2.231	167	0.049
837	167.2	2.233	167.2	0.05
838	167.4	2.234	167.4	0.05
839	167.6	2.236	167.6	0.05
840	167.8	2.237	167.8	0.05
841	168	2.238	168	0.051
842	168.2	2.24	168.2	0.051
843	168.4	2.241	168.4	0.051
844	168.6	2.243	168.6	0.051
845	168.8	2.244	168.8	0.051
846	169	2.245	169	0.051
847	169.2	2.246	169.2	0.051
848	169.4	2.248	169.4	0.051
849	169.6	2.249	169.6	0.051
850	169.8	2.25	169.8	0.051
851	170	2.251	170	0.051
852	170.2	2.252	170.2	0.052
853	170.4	2.253	170.4	0.052
854	170.6	2.255	170.6	0.052
855	170.8	2.256	170.8	0.052
856	171	2.257	171	0.053
857	171.2	2.258	171.2	0.053
858	171.4	2.259	171.4	0.053
859	171.6	2.261	171.6	0.053
860	171.8	2.262	171.8	0.053
861	172	2.264	172	0.053
862	172.2	2.265	172.2	0.053
863	172.4	2.267	172.4	0.052
864	172.6	2.268	172.6	0.052
865	172.8	2.27	172.8	0.052
866	173	2.271	173	0.052
867	173.2	2.273	173.2	0.051
868	173.4	2.274	173.4	0.051
869	173.6	2.276	173.6	0.051
870	173.8	2.277	173.8	0.051
871	174	2.279	174	0.051
872	174.2	2.28	174.2	0.051
873	174.4	2.281	174.4	0.051
874	174.6	2.282	174.6	0.051
875	174.8	2.283	174.8	0.051
876	175	2.284	175	0.051
877	175.2	2.285	175.2	0.051
878	175.4	2.286	175.4	0.051
879	175.6	2.288	175.6	0.051
880	175.8	2.289	175.8	0.052
881	176	2.29	176	0.052
882	176.2	2.292	176.2	0.053
883	176.4	2.293	176.4	0.053
884	176.6	2.295	176.6	0.054
885	176.8	2.296	176.8	0.054
886	177	2.298	177	0.054
887	177.2	2.3	177.2	0.055
888	177.4	2.302	177.4	0.055
889	177.6	2.303	177.6	0.055
890	177.8	2.305	177.8	0.055
891	178	2.306	178	0.055
892	178.2	2.307	178.2	0.055
893	178.4	2.309	178.4	0.055
894	178.6	2.31	178.6	0.055
895	178.8	2.312	178.8	0.055
896	179	2.313	179	0.055
897	179.2	2.314	179.2	0.055
898	179.4	2.316	179.4	0.055
899	179.6	2.317	179.6	0.055
900	179.8	2.318	179.8	0.055
901	180	2.32	180	0.055
902	180.2	2.321	180.2	0.055
903	180.4	2.322	180.4	0.055
904	180.6	2.323	180.6	0.055
905	180.8	2.324	180.8	0.055
906	181	2.325	181	0.055
907	181.2	2.327	181.2	0.055
908	181.4	2.327	181.4	0.056
909	181.6	2.328	181.6	0.056
910	181.8	2.33	181.8	0.056
911	182	2.331	182	0.056
912	182.2	2.332	182.2	0.056
913	182.4	2.333	182.4	0.056
914	182.6	2.334	182.6	0.055
915	182.8	2.336	182.8	0.055
916	183	2.337	183	0.055
917	183.2	2.338	183.2	0.056
918	183.4	2.34	183.4	0.056
919	183.6	2.341	183.6	0.056
920	183.8	2.341	183.8	0.056
921	184	2.343	184	0.056
922	184.2	2.343	184.2	0.055
923	184.4	2.345	184.4	0.055
924	184.6	2.346	184.6	0.056
925	184.8	2.347	184.8	0.056
926	185	2.349	185	0.056
927	185.2	2.35	185.2	0.056
928	185.4	2.351	185.4	0.056
929	185.6	2.353	185.6	0.056
930	185.8	2.354	185.8	0.056
931	186	2.355	186	0.056
932	186.2	2.356	186.2	0.057
933	186.4	2.358	186.4	0.057
934	186.6	2.359	186.6	0.057
935	186.8	2.36	186.8	0.057
936	187	2.362	187	0.058
937	187.2	2.363	187.2	0.058
938	187.4	2.365	187.4	0.058
939	187.6	2.366	187.6	0.058
940	187.8	2.367	187.8	0.058
941	188	2.368	188	0.058
942	188.2	2.369	188.2	0.058
943	188.4	2.371	188.4	0.058
944	188.6	2.372	188.6	0.058
945	188.8	2.373	188.8	0.058
946	189	2.374	189	0.057
947	189.2	2.375	189.2	0.058
948	189.4	2.377	189.4	0.058
949	189.6	2.378	189.6	0.058
950	189.8	2.379	189.8	0.058
951	190	2.38	190	0.059
952	190.2	2.381	190.2	0.059
953	190.4	2.382	190.4	0.059
954	190.6	2.384	190.6	0.059
955	190.8	2.385	190.8	0.059
956	191	2.387	191	0.059
957	191.2	2.389	191.2	0.059
958	191.4	2.39	191.4	0.059
959	191.6	2.391	191.6	0.059
960	191.8	2.393	191.8	0.058
961	192	2.394	192	0.058
962	192.2	2.395	192.2	0.058
963	192.4	2.396	192.4	0.058
964	192.6	2.397	192.6	0.058
965	192.8	2.398	192.8	0.058
966	193	2.4	193	0.058
967	193.2	2.401	193.2	0.058
968	193.4	2.402	193.4	0.058
969	193.6	2.403	193.6	0.059
970	193.8	2.404	193.8	0.059
971	194	2.405	194	0.059
972	194.2	2.406	194.2	0.059
973	194.4	2.407	194.4	0.059
974	194.6	2.408	194.6	0.059
975	194.8	2.409	194.8	0.059
976	195	2.411	195	0.059
977	195.2	2.412	195.2	0.059
978	195.4	2.413	195.4	0.059
979	195.6	2.414	195.6	0.059
980	195.8	2.416	195.8	0.059
981	196	2.417	196	0.059
982	196.2	2.418	196.2	0.059
983	196.4	2.419	196.4	0.059
984	196.6	2.421	196.6	0.06
985	196.8	2.422	196.8	0.06
986	197	2.423	197	0.061
987	197.2	2.424	197.2	0.061
988	197.4	2.425	197.4	0.061
989	197.6	2.426	197.6	0.062
990	197.8	2.427	197.8	0.062
991	198	2.428	198	0.062
992	198.2	2.43	198.2	0.062
993	198.4	2.431	198.4	0.062
994	198.6	2.432	198.6	0.062
995	198.8	2.434	198.8	0.063
996	199	2.435	199	0.063
997	199.2	2.436	199.2	0.063
998	199.4	2.437	199.4	0.062
999	199.6	2.438	199.6	0.062
1000	199.8	2.439	199.8	0.062
1001	200	2.44	200	0.062
1002	200.2	2.441	200.2	0.062
1003	200.4	2.442	200.4	0.063
1004	200.6	2.443	200.6	0.063
1005	200.8	2.445	200.8	0.063
1006	201	2.446	201	0.064
1007	201.2	2.447	201.2	0.064
1008	201.4	2.448	201.4	0.064
1009	201.6	2.449	201.6	0.064
1010	201.8	2.45	201.8	0.064
1011	202	2.452	202	0.064
1012	202.2	2.453	202.2	0.064
1013	202.4	2.454	202.4	0.063
1014	202.6	2.455	202.6	0.063
1015	202.8	2.456	202.8	0.063
1016	203	2.457	203	0.062
1017	203.2	2.458	203.2	0.061
1018	203.4	2.459	203.4	0.061
1019	203.6	2.46	203.6	0.061
1020	203.8	2.461	203.8	0.061
1021	204	2.462	204	0.061
1022	204.2	2.463	204.2	0.062
1023	204.4	2.465	204.4	0.062
1024	204.6	2.466	204.6	0.063
1025	204.8	2.468	204.8	0.063
1026	205	2.469	205	0.063
1027	205.2	2.47	205.2	0.064
1028	205.4	2.471	205.4	0.064
1029	205.6	2.472	205.6	0.065
1030	205.8	2.473	205.8	0.065
1031	206	2.474	206	0.065
1032	206.2	2.474	206.2	0.065
1033	206.4	2.475	206.4	0.066
1034	206.6	2.476	206.6	0.066
1035	206.8	2.477	206.8	0.066
1036	207	2.479	207	0.066
1037	207.2	2.48	207.2	0.065
1038	207.4	2.481	207.4	0.065
1039	207.6	2.483	207.6	0.065
1040	207.8	2.484	207.8	0.065
1041	208	2.486	208	0.065
1042	208.2	2.487	208.2	0.065
1043	208.4	2.488	208.4	0.064
1044	208.6	2.489	208.6	0.064
1045	208.8	2.49	208.8	0.064
1046	209	2.491	209	0.064
1047	209.2	2.492	209.2	0.063
1048	209.4	2.493	209.4	0.063
1049	209.6	2.494	209.6	0.063
1050	209.8	2.494	209.8	0.063
1051	210	2.495	210	0.064
1052	210.2	2.496	210.2	0.064
1053	210.4	2.497	210.4	0.064
1054	210.6	2.498	210.6	0.065
1055	210.8	2.5	210.8	0.065
1056	211	2.501	211	0.065
1057	211.2	2.503	211.2	0.065
1058	211.4	2.504	211.4	0.065
1059	211.6	2.506	211.6	0.065
1060	211.8	2.507	211.8	0.065
1061	212	2.509	212	0.065
1062	212.2	2.51	212.2	0.065
1063	212.4	2.512	212.4	0.065
1064	212.6	2.513	212.6	0.065
1065	212.8	2.514	212.8	0.065
1066	213	2.516	213	0.065
1067	213.2	2.517	213.2	0.065
1068	213.4	2.518	213.4	0.065
1069	213.6	2.519	213.6	0.065
1070	213.8	2.519	213.8	0.065
1071	214	2.52	214	0.065
1072	214.2	2.521	214.2	0.065
1073	214.4	2.522	214.4	0.065
1074	214.6	2.523	214.6	0.065
1075	214.8	2.524	214.8	0.065
1076	215	2.525	215	0.065
1077	215.2	2.526	215.2	0.065
1078	215.4	2.527	215.4	0.066
1079	215.6	2.528	215.6	0.066
1080	215.8	2.529	215.8	0.067
1081	216	2.53	216	0.067
1082	216.2	2.531	216.2	0.067
1083	216.4	2.532	216.4	0.068
1084	216.6	2.533	216.6	0.068
1085	216.8	2.534	216.8	0.068
1086	217	2.535	217	0.068
1087	217.2	2.536	217.2	0.068
1088	217.4	2.537	217.4	0.068
1089	217.6	2.538	217.6	0.069
1090	217.8	2.539	217.8	0.069
1091	218	2.54	218	0.069
1092	218.2	2.541	218.2	0.069
1093	218.4	2.543	218.4	0.069
1094	218.6	2.544	218.6	0.068
1095	218.8	2.546	218.8	0.069
1096	219	2.548	219	0.069
1097	219.2	2.55	219.2	0.069
1098	219.4	2.551	219.4	0.069
1099	219.6	2.552	219.6	0.069
1100	219.8	2.553	219.8	0.069
1101	220	2.554	220	0.069
1102	220.2	2.554	220.2	0.069
1103	220.4	2.555	220.4	0.069
1104	220.6	2.555	220.6	0.069
1105	220.8	2.556	220.8	0.069
1106	221	2.556	221	0.069
1107	221.2	2.557	221.2	0.069
1108	221.4	2.558	221.4	0.069
1109	221.6	2.559	221.6	0.069
1110	221.8	2.56	221.8	0.069
1111	222	2.561	222	0.069
1112	222.2	2.562	222.2	0.069
1113	222.4	2.563	222.4	0.069
1114	222.6	2.564	222.6	0.069
1115	222.8	2.565	222.8	0.07
1116	223	2.566	223	0.07
1117	223.2	2.568	223.2	0.07
1118	223.4	2.569	223.4	0.07
1119	223.6	2.57	223.6	0.07
1120	223.8	2.571	223.8	0.07
1121	224	2.572	224	0.07
1122	224.2	2.573	224.2	0.07
1123	224.4	2.574	224.4	0.07
1124	224.6	2.574	224.6	0.07
1125	224.8	2.575	224.8	0.069
1126	225	2.576	225	0.069
1127	225.2	2.577	225.2	0.069
1128	225.4	2.578	225.4	0.069
1129	225.6	2.579	225.6	0.069
1130	225.8	2.581	225.8	0.068
1131	226	2.582	226	0.068
1132	226.2	2.583	226.2	0.069
1133	226.4	2.584	226.4	0.069
1134	226.6	2.586	226.6	0.069
1135	226.8	2.587	226.8	0.069
1136	227	2.588	227	0.07
1137	227.2	2.589	227.2	0.07
1138	227.4	2.59	227.4	0.07
1139	227.6	2.591	227.6	0.07
1140	227.8	2.592	227.8	0.07
1141	228	2.594	228	0.07
1142	228.2	2.595	228.2	0.07
1143	228.4	2.595	228.4	0.07
1144	228.6	2.596	228.6	0.07
1145	228.8	2.597	228.8	0.07
1146	229	2.598	229	0.07
1147	229.2	2.598	229.2	0.071
1148	229.4	2.599	229.4	0.071
1149	229.6	2.6	229.6	0.071
1150	229.8	2.601	229.8	0.071
1151	230	2.602	230	0.071
1152	230.2	2.603	230.2	0.071
1153	230.4	2.605	230.4	0.071
1154	230.6	2.606	230.6	0.071
1155	230.8	2.607	230.8	0.071
1156	231	2.608	231	0.072
1157	231.2	2.609	231.2	0.072
1158	231.4	2.61	231.4	0.072
1159	231.6	2.611	231.6	0.072
1160	231.8	2.612	231.8	0.071
1161	232	2.613	232	0.071
1162	232.2	2.614	232.2	0.072
1163	232.4	2.615	232.4	0.072
1164	232.6	2.616	232.6	0.072
1165	232.8	2.617	232.8	0.073
1166	233	2.618	233	0.073
1167	233.2	2.619	233.2	0.074
1168	233.4	2.62	233.4	0.073
1169	233.6	2.621	233.6	0.073
1170	233.8	2.622	233.8	0.073
1171	234	2.623	234	0.073
1172	234.2	2.624	234.2	0.072
1173	234.4	2.624	234.4	0.072
1174	234.6	2.625	234.6	0.072
1175	234.8	2.626	234.8	0.072
1176	235	2.626	235	0.072
1177	235.2	2.627	235.2	0.072
1178	235.4	2.627	235.4	0.072
1179	235.6	2.628	235.6	0.072
1180	235.8	2.629	235.8	0.072
1181	236	2.63	236	0.072
1182	236.2	2.631	236.2	0.072
1183	236.4	2.632	236.4	0.072
1184	236.6	2.633	236.6	0.072
1185	236.8	2.634	236.8	0.073
1186	237	2.634	237	0.073
1187	237.2	2.635	237.2	0.073
1188	237.4	2.636	237.4	0.074
1189	237.6	2.637	237.6	0.074
1190	237.8	2.638	237.8	0.074
1191	238	2.638	238	0.074
1192	238.2	2.639	238.2	0.074
1193	238.4	2.64	238.4	0.074
1194	238.6	2.641	238.6	0.075
1195	238.8	2.642	238.8	0.075
1196	239	2.643	239	0.075
1197	239.2	2.644	239.2	0.075
1198	239.4	2.645	239.4	0.075
1199	239.6	2.646	239.6	0.075
1200	239.8	2.647	239.8	0.076
1201	240	2.648	240	0.076
1202	240.2	2.649	240.2	0.076
1203	240.4	2.65	240.4	0.076
1204	240.6	2.651	240.6	0.076
1205	240.8	2.653	240.8	0.076
1206	241	2.654	241	0.076
1207	241.2	2.655	241.2	0.076
1208	241.4	2.657	241.4	0.075
1209	241.6	2.658	241.6	0.075
1210	241.8	2.66	241.8	0.075
1211	242	2.661	242	0.074
1212	242.2	2.662	242.2	0.074
1213	242.4	2.663	242.4	0.074
1214	242.6	2.664	242.6	0.074
1215	242.8	2.665	242.8	0.074
1216	243	2.666	243	0.075
1217	243.2	2.667	243.2	0.075
1218	243.4	2.668	243.4	0.075
1219	243.6	2.668	243.6	0.075
1220	243.8	2.669	243.8	0.076
1221	244	2.669	244	0.076
1222	244.2	2.67	244.2	0.076
1223	244.4	2.67	244.4	0.077
1224	244.6	2.671	244.6	0.077
1225	244.8	2.672	244.8	0.077
1226	245	2.673	245	0.077
1227	245.2	2.674	245.2	0.077
1228	245.4	2.675	245.4	0.077
1229	245.6	2.676	245.6	0.076
1230	245.8	2.678	245.8	0.076
1231	246	2.679	246	0.076
1232	246.2	2.68	246.2	0.076
1233	246.4	2.681	246.4	0.076
1234	246.6	2.682	246.6	0.076
1235	246.8	2.683	246.8	0.076
1236	247	2.684	247	0.077
1237	247.2	2.684	247.2	0.077
1238	247.4	2.685	247.4	0.077
1239	247.6	2.686	247.6	0.077
1240	247.8	2.687	247.8	0.077
1241	248	2.687	248	0.077
1242	248.2	2.688	248.2	0.077
1243	248.4	2.689	248.4	0.077
1244	248.6	2.691	248.6	0.077
1245	248.8	2.692	248.8	0.077
1246	249	2.694	249	0.077
1247	249.2	2.695	249.2	0.077
1248	249.4	2.696	249.4	0.077
1249	249.6	2.697	249.6	0.077
1250	249.8	2.698	249.8	0.077
1251	250	2.699	250	0.078
1252	250.2	2.7	250.2	0.078
1253	250.4	2.701	250.4	0.079
1254	250.6	2.702	250.6	0.079
1255	250.8	2.703	250.8	0.079
1256	251	2.703	251	0.08
1257	251.2	2.704	251.2	0.08
1258	251.4	2.704	251.4	0.08
1259	251.6	2.704	251.6	0.079
1260	251.8	2.704	251.8	0.079
1261	252	2.705	252	0.079
1262	252.2	2.705	252.2	0.079
1263	252.4	2.706	252.4	0.078
1264	252.6	2.707	252.6	0.078
1265	252.8	2.708	252.8	0.078
1266	253	2.709	253	0.079
1267	253.2	2.71	253.2	0.079
1268	253.4	2.711	253.4	0.08
1269	253.6	2.712	253.6	0.08
1270	253.8	2.714	253.8	0.081
1271	254	2.715	254	0.081
1272	254.2	2.716	254.2	0.082
1273	254.4	2.718	254.4	0.082
1274	254.6	2.719	254.6	0.081
1275	254.8	2.72	254.8	0.081
1276	255	2.721	255	0.081
1277	255.2	2.721	255.2	0.081
1278	255.4	2.722	255.4	0.081
1279	255.6	2.723	255.6	0.081
1280	255.8	2.724	255.8	0.081
1281	256	2.725	256	0.08
1282	256.2	2.725	256.2	0.08
1283	256.4	2.726	256.4	0.08
1284	256.6	2.727	256.6	0.08
1285	256.8	2.728	256.8	0.08
1286	257	2.729	257	0.08
1287	257.2	2.73	257.2	0.08
1288	257.4	2.731	257.4	0.08
1289	257.6	2.732	257.6	0.08
1290	257.8	2.733	257.8	0.08
1291	258	2.734	258	0.08
1292	258.2	2.735	258.2	0.08
1293	258.4	2.736	258.4	0.08
1294	258.6	2.737	258.6	0.08
1295	258.8	2.739	258.8	0.081
1296	259	2.74	259	0.081
1297	259.2	2.741	259.2	0.081
1298	259.4	2.741	259.4	0.081
1299	259.6	2.742	259.6	0.081
1300	259.8	2.743	259.8	0.081
1301	260	2.743	260	0.081
1302	260.2	2.744	260.2	0.081
1303	260.4	2.745	260.4	0.081
1304	260.6	2.746	260.6	0.081
1305	260.8	2.746	260.8	0.081
1306	261	2.747	261	0.081
1307	261.2	2.748	261.2	0.081
1308	261.4	2.749	261.4	0.081
1309	261.6	2.75	261.6	0.082
1310	261.8	2.75	261.8	0.082
1311	262	2.751	262	0.083
1312	262.2	2.753	262.2	0.083
1313	262.4	2.754	262.4	0.083
1314	262.6	2.755	262.6	0.083
1315	262.8	2.756	262.8	0.083
1316	263	2.757	263	0.083
1317	263.2	2.758	263.2	0.083
1318	263.4	2.758	263.4	0.083
1319	263.6	2.759	263.6	0.082
1320	263.8	2.76	263.8	0.082
1321	264	2.76	264	0.082
1322	264.2	2.761	264.2	0.082
1323	264.4	2.762	264.4	0.082
1324	264.6	2.763	264.6	0.083
1325	264.8	2.763	264.8	0.083
1326	265	2.764	265	0.083
1327	265.2	2.764	265.2	0.084
1328	265.4	2.765	265.4	0.084
1329	265.6	2.765	265.6	0.085
1330	265.8	2.766	265.8	0.085
1331	266	2.767	266	0.085
1332	266.2	2.768	266.2	0.085
1333	266.4	2.769	266.4	0.085
1334	266.6	2.77	266.6	0.085
1335	266.8	2.771	266.8	0.084
1336	267	2.772	267	0.084
1337	267.2	2.773	267.2	0.084
1338	267.4	2.773	267.4	0.084
1339	267.6	2.774	267.6	0.084
1340	267.8	2.776	267.8	0.084
1341	268	2.777	268	0.084
1342	268.2	2.779	268.2	0.084
1343	268.4	2.78	268.4	0.084
1344	268.6	2.782	268.6	0.084
1345	268.8	2.783	268.8	0.083
1346	269	2.784	269	0.083
1347	269.2	2.785	269.2	0.084
1348	269.4	2.786	269.4	0.084
1349	269.6	2.787	269.6	0.084
1350	269.8	2.788	269.8	0.084
1351	270	2.788	270	0.084
1352	270.2	2.789	270.2	0.085
1353	270.4	2.789	270.4	0.085
1354	270.6	2.789	270.6	0.085
1355	270.8	2.79	270.8	0.086
1356	271	2.79	271	0.086
1357	271.2	2.79	271.2	0.086
1358	271.4	2.79	271.4	0.086
1359	271.6	2.791	271.6	0.086
1360	271.8	2.792	271.8	0.086
1361	272	2.792	272	0.086
1362	272.2	2.793	272.2	0.086
1363	272.4	2.794	272.4	0.086
1364	272.6	2.795	272.6	0.086
1365	272.8	2.796	272.8	0.085
1366	273	2.797	273	0.085
1367	273.2	2.798	273.2	0.085
1368	273.4	2.799	273.4	0.086
1369	273.6	2.8	273.6	0.086
1370	273.8	2.801	273.8	0.086
1371	274	2.803	274	0.086
1372	274.2	2.804	274.2	0.086
1373	274.4	2.805	274.4	0.086
1374	274.6	2.806	274.6	0.086
1375	274.8	2.807	274.8	0.087
1376	275	2.808	275	0.087
1377	275.2	2.809	275.2	0.087
1378	275.4	2.809	275.4	0.087
1379	275.6	2.81	275.6	0.087
1380	275.8	2.81	275.8	0.087
1381	276	2.811	276	0.087
1382	276.2	2.812	276.2	0.087
1383	276.4	2.813	276.4	0.087
1384	276.6	2.813	276.6	0.087
1385	276.8	2.814	276.8	0.086
1386	277	2.815	277	0.086
1387	277.2	2.815	277.2	0.086
1388	277.4	2.816	277.4	0.086
1389	277.6	2.817	277.6	0.086
1390	277.8	2.818	277.8	0.086
1391	278	2.819	278	0.086
1392	278.2	2.82	278.2	0.086
1393	278.4	2.821	278.4	0.086
1394	278.6	2.823	278.6	0.086
1395	278.8	2.823	278.8	0.086
1396	279	2.824	279	0.086
1397	279.2	2.825	279.2	0.087
1398	279.4	2.826	279.4	0.087
1399	279.6	2.826	279.6	0.087
1400	279.8	2.827	279.8	0.087
1401	280	2.828	280	0.087
1402	280.2	2.829	280.2	0.087
1403	280.4	2.829	280.4	0.087
1404	280.6	2.83	280.6	0.087
1405	280.8	2.831	280.8	0.087
1406	281	2.832	281	0.087
1407	281.2	2.832	281.2	0.087
1408	281.4	2.833	281.4	0.087
1409	281.6	2.834	281.6	0.087
1410	281.8	2.835	281.8	0.087
1411	282	2.836	282	0.088
1412	282.2	2.837	282.2	0.088
1413	282.4	2.837	282.4	0.088
1414	282.6	2.838	282.6	0.088
1415	282.8	2.839	282.8	0.089
1416	283	2.84	283	0.089
1417	283.2	2.841	283.2	0.089
1418	283.4	2.842	283.4	0.089
1419	283.6	2.842	283.6	0.089
1420	283.8	2.843	283.8	0.089
1421	284	2.844	284	0.089
1422	284.2	2.844	284.2	0.089
1423	284.4	2.845	284.4	0.089
1424	284.6	2.845	284.6	0.089
1425	284.8	2.846	284.8	0.089
1426	285	2.847	285	0.088
1427	285.2	2.847	285.2	0.088
1428	285.4	2.848	285.4	0.088
1429	285.6	2.848	285.6	0.088
1430	285.8	2.849	285.8	0.088
1431	286	2.85	286	0.089
1432	286.2	2.85	286.2	0.089
1433	286.4	2.851	286.4	0.089
1434	286.6	2.852	286.6	0.089
1435	286.8	2.853	286.8	0.089
1436	287	2.853	287	0.089
1437	287.2	2.854	287.2	0.089
1438	287.4	2.855	287.4	0.09
1439	287.6	2.856	287.6	0.09
1440	287.8	2.857	287.8	0.09
1441	288	2.858	288	0.091
1442	288.2	2.859	288.2	0.091
1443	288.4	2.86	288.4	0.091
1444	288.6	2.861	288.6	0.091
1445	288.8	2.863	288.8	0.091
1446	289	2.864	289	0.091
1447	289.2	2.865	289.2	0.092
1448	289.4	2.865	289.4	0.091
1449	289.6	2.866	289.6	0.091
1450	289.8	2.867	289.8	0.091
1451	290	2.867	290	0.091
1452	290.2	2.868	290.2	0.091
1453	290.4	2.869	290.4	0.091
1454	290.6	2.869	290.6	0.091
1455	290.8	2.87	290.8	0.091
1456	291	2.87	291	0.091
1457	291.2	2.871	291.2	0.091
1458	291.4	2.871	291.4	0.091
1459	291.6	2.872	291.6	0.092
1460	291.8	2.872	291.8	0.092
1461	292	2.873	292	0.092
1462	292.2	2.874	292.2	0.092
1463	292.4	2.875	292.4	0.093
1464	292.6	2.876	292.6	0.093
1465	292.8	2.876	292.8	0.093
1466	293	2.877	293	0.093
1467	293.2	2.878	293.2	0.093
1468	293.4	2.88	293.4	0.093
1469	293.6	2.881	293.6	0.093
1470	293.8	2.882	293.8	0.093
1471	294	2.883	294	0.093
1472	294.2	2.884	294.2	0.093
1473	294.4	2.885	294.4	0.092
1474	294.6	2.886	294.6	0.092
1475	294.8	2.887	294.8	0.092
1476	295	2.888	295	0.092
1477	295.2	2.889	295.2	0.092
1478	295.4	2.889	295.4	0.092
1479	295.6	2.89	295.6	0.092
1480	295.8	2.891	295.8	0.092
1481	296	2.892	296	0.093
1482	296.2	2.892	296.2	0.093
1483	296.4	2.892	296.4	0.093
1484	296.6	2.893	296.6	0.093
1485	296.8	2.893	296.8	0.094
1486	297	2.894	297	0.094
1487	297.2	2.894	297.2	0.094
1488	297.4	2.895	297.4	0.094
1489	297.6	2.895	297.6	0.094
1490	297.8	2.896	297.8	0.094
1491	298	2.897	298	0.094
1492	298.2	2.897	298.2	0.094
1493	298.4	2.898	298.4	0.094
1494	298.6	2.898	298.6	0.094
1495	298.8	2.899	298.8	0.094
1496	299	2.9	299	0.094
1497	299.2	2.901	299.2	0.095
1498	299.4	2.902	299.4	0.095
1499	299.6	2.904	299.6	0.095
1500	299.8	2.905	299.8	0.095
1501	300	2.906	300	0.095
1502	300.2	2.906	300.2	0.095
1503	300.4	2.907	300.4	0.095
1504	300.6	2.908	300.6	0.094
1505	300.8	2.909	300.8	0.094
1506	301	2.91	301	0.094
1507	301.2	2.912	301.2	0.093
1508	301.4	2.912	301.4	0.093
1509	301.6	2.913	301.6	0.093
1510	301.8	2.914	301.8	0.093
1511	302	2.915	302	0.094
1512	302.2	2.915	302.2	0.094
1513	302.4	2.916	302.4	0.094
1514	302.6	2.917	302.6	0.094
1515	302.8	2.917	302.8	0.094
1516	303	2.918	303	0.095
1517	303.2	2.918	303.2	0.095
1518	303.4	2.919	303.4	0.095
1519	303.6	2.919	303.6	0.096
1520	303.8	2.92	303.8	0.096
1521	304	2.92	304	0.096
1522	304.2	2.92	304.2	0.096
1523	304.4	2.921	304.4	0.096
1524	304.6	2.921	304.6	0.096
1525	304.8	2.922	304.8	0.096
1526	305	2.923	305	0.096
1527	305.2	2.923	305.2	0.096
1528	305.4	2.924	305.4	0.096
1529	305.6	2.925	305.6	0.096
1530	305.8	2.926	305.8	0.096
1531	306	2.926	306	0.096
1532	306.2	2.927	306.2	0.096
1533	306.4	2.928	306.4	0.096
1534	306.6	2.928	306.6	0.097
1535	306.8	2.929	306.8	0.097
1536	307	2.93	307	0.097
1537	307.2	2.931	307.2	0.097
1538	307.4	2.932	307.4	0.097
1539	307.6	2.933	307.6	0.097
1540	307.8	2.934	307.8	0.097
1541	308	2.935	308	0.097
1542	308.2	2.935	308.2	0.097
1543	308.4	2.936	308.4	0.097
1544	308.6	2.937	308.6	0.097
1545	308.8	2.937	308.8	0.097
1546	309	2.938	309	0.096
1547	309.2	2.938	309.2	0.096
1548	309.4	2.939	309.4	0.096
1549	309.6	2.94	309.6	0.097
1550	309.8	2.94	309.8	0.097
1551	310	2.941	310	0.097
1552	310.2	2.942	310.2	0.098
1553	310.4	2.942	310.4	0.098
1554	310.6	2.943	310.6	0.099
1555	310.8	2.945	310.8	0.1
1556	311	2.946	311	0.1
1557	311.2	2.947	311.2	0.101
1558	311.4	2.948	311.4	0.101
1559	311.6	2.949	311.6	0.101
1560	311.8	2.95	311.8	0.101
1561	312	2.951	312	0.101
1562	312.2	2.952	312.2	0.101
1563	312.4	2.952	312.4	0.101
1564	312.6	2.953	312.6	0.1
1565	312.8	2.954	312.8	0.1
1566	313	2.955	313	0.1
1567	313.2	2.955	313.2	0.099
1568	313.4	2.956	313.4	0.099
1569	313.6	2.957	313.6	0.099
1570	313.8	2.958	313.8	0.098
1571	314	2.958	314	0.098
1572	314.2	2.959	314.2	0.098
1573	314.4	2.96	314.4	0.098
1574	314.6	2.961	314.6	0.098
1575	314.8	2.962	314.8	0.098
1576	315	2.963	315	0.098
1577	315.2	2.963	315.2	0.099
1578	315.4	2.964	315.4	0.099
1579	315.6	2.964	315.6	0.099
1580	315.8	2.965	315.8	0.1
1581	316	2.965	316	0.1
1582	316.2	2.966	316.2	0.1
1583	316.4	2.967	316.4	0.101
1584	316.6	2.967	316.6	0.101
1585	316.8	2.968	316.8	0.101
1586	317	2.968	317	0.101
1587	317.2	2.969	317.2	0.102
1588	317.4	2.97	317.4	0.102
1589	317.6	2.97	317.6	0.102
1590	317.8	2.971	317.8	0.102
1591	318	2.972	318	0.102
1592	318.2	2.973	318.2	0.102
1593	318.4	2.973	318.4	0.102
1594	318.6	2.974	318.6	0.102
1595	318.8	2.975	318.8	0.102
1596	319	2.975	319	0.102
1597	319.2	2.976	319.2	0.102
1598	319.4	2.976	319.4	0.102
1599	319.6	2.976	319.6	0.102
1600	319.8	2.977	319.8	0.102
1601	320	2.978	320	0.102
1602	320.2	2.978	320.2	0.102
1603	320.4	2.979	320.4	0.102
1604	320.6	2.98	320.6	0.102
1605	320.8	2.98	320.8	0.102
1606	321	2.981	321	0.102
1607	321.2	2.982	321.2	0.102
1608	321.4	2.982	321.4	0.102
1609	321.6	2.983	321.6	0.102
1610	321.8	2.984	321.8	0.102
1611	322	2.984	322	0.102
1612	322.2	2.985	322.2	0.103
1613	322.4	2.986	322.4	0.103
1614	322.6	2.987	322.6	0.102
1615	322.8	2.988	322.8	0.102
1616	323	2.989	323	0.102
1617	323.2	2.99	323.2	0.102
1618	323.4	2.99	323.4	0.102
1619	323.6	2.991	323.6	0.102
1620	323.8	2.992	323.8	0.103
1621	324	2.993	324	0.103
1622	324.2	2.993	324.2	0.104
1623	324.4	2.994	324.4	0.104
1624	324.6	2.995	324.6	0.104
1625	324.8	2.995	324.8	0.104
1626	325	2.995	325	0.104
1627	325.2	2.995	325.2	0.105
1628	325.4	2.995	325.4	0.105
1629	325.6	2.995	325.6	0.105
1630	325.8	2.996	325.8	0.105
1631	326	2.996	326	0.105
1632	326.2	2.997	326.2	0.105
1633	326.4	2.998	326.4	0.105
1634	326.6	3	326.6	0.104
1635	326.8	3.001	326.8	0.104
1636	327	3.002	327	0.104
1637	327.2	3.003	327.2	0.104
1638	327.4	3.004	327.4	0.104
1639	327.6	3.005	327.6	0.104
1640	327.8	3.006	327.8	0.104
1641	328	3.007	328	0.104
1642	328.2	3.007	328.2	0.104
1643	328.4	3.008	328.4	0.104
1644	328.6	3.008	328.6	0.104
1645	328.8	3.008	328.8	0.104
1646	329	3.009	329	0.105
1647	329.2	3.009	329.2	0.105
1648	329.4	3.009	329.4	0.105
1649	329.6	3.009	329.6	0.105
1650	329.8	3.009	329.8	0.106
1651	330	3.009	330	0.106
1652	330.2	3.004	330.2	0.101
1653	330.4	2.998	330.4	0.097
1654	330.6	2.992	330.6	0.092
1655	330.8	2.985	330.8	0.087
1656	331	2.977	331	0.082
1657	331.2	2.97	331.2	0.077
1658	331.4	2.962	331.4	0.072
1659	331.6	2.955	331.6	0.068
1660	331.8	2.948	331.8	0.064
1661	332	2.941	332	0.061
1662	332.2	2.936	332.2	0.059
1663	332.4	2.931	332.4	0.058
1664	332.6	2.926	332.6	0.057
1665	332.8	2.922	332.8	0.056
1666	333	2.918	333	0.055
1667	333.2	2.914	333.2	0.054
1668	333.4	2.911	333.4	0.054
1669	333.6	2.907	333.6	0.053
1670	333.8	2.903	333.8	0.052
1671	334	2.9	334	0.052
1672	334.2	2.897	334.2	0.051
1673	334.4	2.894	334.4	0.05
1674	334.6	2.891	334.6	0.049
1675	334.8	2.888	334.8	0.049
1676	335	2.885	335	0.048
1677	335.2	2.883	335.2	0.047
1678	335.4	2.881	335.4	0.047
1679	335.6	2.878	335.6	0.046
1680	335.8	2.876	335.8	0.045
1681	336	2.874	336	0.045
1682	336.2	2.872	336.2	0.044
1683	336.4	2.87	336.4	0.044
1684	336.6	2.868	336.6	0.044
1685	336.8	2.866	336.8	0.043
1686	337	2.864	337	0.043
1687	337.2	2.862	337.2	0.042
1688	337.4	2.86	337.4	0.042
1689	337.6	2.858	337.6	0.042
1690	337.8	2.856	337.8	0.041
1691	338	2.854	338	0.041
1692	338.2	2.852	338.2	0.04
1693	338.4	2.851	338.4	0.04
1694	338.6	2.849	338.6	0.039
1695	338.8	2.847	338.8	0.039
1696	339	2.846	339	0.038
1697	339.2	2.844	339.2	0.038
1698	339.4	2.843	339.4	0.037
1699	339.6	2.841	339.6	0.037
1700	339.8	2.84	339.8	0.037
1701	340	2.839	340	0.037
1702	340.2	2.837	340.2	0.036
1703	340.4	2.836	340.4	0.036
1704	340.6	2.835	340.6	0.036
1705	340.8	2.834	340.8	0.035
1706	341	2.832	341	0.035
1707	341.2	2.831	341.2	0.035
1708	341.4	2.83	341.4	0.035
1709	341.6	2.829	341.6	0.034
1710	341.8	2.827	341.8	0.034
1711	342	2.826	342	0.034
1712	342.2	2.825	342.2	0.033
1713	342.4	2.824	342.4	0.033
1714	342.6	2.823	342.6	0.032
1715	342.8	2.822	342.8	0.032
1716	343	2.82	343	0.032
1717	343.2	2.819	343.2	0.031
1718	343.4	2.818	343.4	0.031
1719	343.6	2.817	343.6	0.031
1720	343.8	2.816	343.8	0.031
1721	344	2.815	344	0.031
1722	344.2	2.814	344.2	0.031
1723	344.4	2.813	344.4	0.031
1724	344.6	2.812	344.6	0.031
1725	344.8	2.811	344.8	0.031
1726	345	2.809	345	0.03
1727	345.2	2.808	345.2	0.03
1728	345.4	2.807	345.4	0.03
1729	345.6	2.806	345.6	0.029
1730	345.8	2.805	345.8	0.029
1731	346	2.804	346	0.028
1732	346.2	2.803	346.2	0.028
1733	346.4	2.802	346.4	0.027
1734	346.6	2.801	346.6	0.027
1735	346.8	2.8	346.8	0.026
1736	347	2.799	347	0.026
1737	347.2	2.799	347.2	0.026
1738	347.4	2.798	347.4	0.026
1739	347.6	2.797	347.6	0.026
1740	347.8	2.796	347.8	0.026
1741	348	2.796	348	0.027
1742	348.2	2.795	348.2	0.027
1743	348.4	2.794	348.4	0.027
1744	348.6	2.793	348.6	0.027
1745	348.8	2.792	348.8	0.028
1746	349	2.791	349	0.028
1747	349.2	2.791	349.2	0.028
1748	349.4	2.79	349.4	0.028
1749	349.6	2.79	349.6	0.028
1750	349.8	2.789	349.8	0.028
1751	350	2.788	350	0.028
1752	350.2	2.788	350.2	0.027
1753	350.4	2.787	350.4	0.027
1754	350.6	2.786	350.6	0.027
1755	350.8	2.785	350.8	0.027
1756	351	2.785	351	0.027
1757	351.2	2.784	351.2	0.026
1758	351.4	2.783	351.4	0.026
1759	351.6	2.783	351.6	0.026
1760	351.8	2.782	351.8	0.025
1761	352	2.781	352	0.025
1762	352.2	2.781	352.2	0.025
1763	352.4	2.78	352.4	0.024
1764	352.6	2.78	352.6	0.024
1765	352.8	2.78	352.8	0.024
1766	353	2.779	353	0.024
1767	353.2	2.779	353.2	0.023
1768	353.4	2.778	353.4	0.023
1769	353.6	2.778	353.6	0.023
1770	353.8	2.777	353.8	0.023
1771	354	2.776	354	0.023
1772	354.2	2.776	354.2	0.023
1773	354.4	2.776	354.4	0.023
1774	354.6	2.775	354.6	0.023
1775	354.8	2.774	354.8	0.023
1776	355	2.774	355	0.023
1777	355.2	2.773	355.2	0.022
1778	355.4	2.772	355.4	0.022
1779	355.6	2.771	355.6	0.022
1780	355.8	2.77	355.8	0.022
1781	356	2.769	356	0.022
1782	356.2	2.769	356.2	0.021
1783	356.4	2.768	356.4	0.021
1784	356.6	2.767	356.6	0.021
1785	356.8	2.767	356.8	0.022
1786	357	2.766	357	0.021
1787	357.2	2.766	357.2	0.021
1788	357.4	2.765	357.4	0.021
1789	357.6	2.765	357.6	0.02
1790	357.8	2.765	357.8	0.02
1791	358	2.765	358	0.019
1792	358.2	2.764	358.2	0.019
1793	358.4	2.764	358.4	0.019
1794	358.6	2.764	358.6	0.018
1795	358.8	2.763	358.8	0.018
1796	359	2.762	359	0.018
1797	359.2	2.761	359.2	0.019
1798	359.4	2.761	359.4	0.019
1799	359.6	2.76	359.6	0.019
1800	359.8	2.759	359.8	0.019
1801	360	2.758	360	0.019
1802	360.2	2.757	360.2	0.02
1803	360.4	2.756	360.4	0.02
1804	360.6	2.755	360.6	0.02
1805	360.8	2.755	360.8	0.02
1806	361	2.754	361	0.019
1807	361.2	2.754	361.2	0.019
1808	361.4	2.753	361.4	0.019
1809	361.6	2.753	361.6	0.019
1810	361.8	2.753	361.8	0.019
1811	362	2.753	362	0.019
1812	362.2	2.752	362.2	0.019
1813	362.4	2.752	362.4	0.019
1814	362.6	2.752	362.6	0.019
1815	362.8	2.752	362.8	0.019
1816	363	2.751	363	0.019
1817	363.2	2.751	363.2	0.019
1818	363.4	2.751	363.4	0.019
1819	363.6	2.751	363.6	0.019
1820	363.8	2.75	363.8	0.019
1821	364	2.75	364	0.019
1822	364.2	2.749	364.2	0.018
1823	364.4	2.749	364.4	0.018
1824	364.6	2.748	364.6	0.018
1825	364.8	2.748	364.8	0.018
1826	365	2.748	365	0.017
1827	365.2	2.748	365.2	0.017
1828	365.4	2.747	365.4	0.018
1829	365.6	2.747	365.6	0.018
1830	365.8	2.747	365.8	0.018
1831	366	2.746	366	0.018
1832	366.2	2.746	366.2	0.017
1833	366.4	2.745	366.4	0.017
1834	366.6	2.745	366.6	0.017
1835	366.8	2.744	366.8	0.017
1836	367	2.743	367	0.016
1837	367.2	2.743	367.2	0.016
1838	367.4	2.742	367.4	0.016
1839	367.6	2.741	367.6	0.016
1840	367.8	2.741	367.8	0.016
1841	368	2.74	368	0.016
1842	368.2	2.739	368.2	0.016
1843	368.4	2.739	368.4	0.016
1844	368.6	2.738	368.6	0.016
1845	368.8	2.738	368.8	0.016
1846	369	2.738	369	0.016
1847	369.2	2.737	369.2	0.016
1848	369.4	2.737	369.4	0.016
1849	369.6	2.736	369.6	0.016
1850	369.8	2.736	369.8	0.016
1851	370	2.735	370	0.016
1852	370.2	2.735	370.2	0.016
1853	370.4	2.734	370.4	0.015
1854	370.6	2.734	370.6	0.015
1855	370.8	2.734	370.8	0.015
1856	371	2.733	371	0.015
1857	371.2	2.733	371.2	0.015
1858	371.4	2.733	371.4	0.015
1859	371.6	2.733	371.6	0.015
1860	371.8	2.732	371.8	0.015
1861	372	2.732	372	0.015
1862	372.2	2.732	372.2	0.015
1863	372.4	2.731	372.4	0.015
1864	372.6	2.731	372.6	0.015
1865	372.8	2.73	372.8	0.015
1866	373	2.73	373	0.014
1867	373.2	2.729	373.2	0.014
1868	373.4	2.729	373.4	0.014
1869	373.6	2.728	373.6	0.014
1870	373.8	2.728	373.8	0.014
1871	374	2.728	374	0.014
1872	374.2	2.728	374.2	0.014
1873	374.4	2.727	374.4	0.014
1874	374.6	2.728	374.6	0.015
1875	374.8	2.728	374.8	0.015
1876	375	2.728	375	0.014
1877	375.2	2.728	375.2	0.014
1878	375.4	2.728	375.4	0.014
1879	375.6	2.727	375.6	0.014
1880	375.8	2.727	375.8	0.014
1881	376	2.726	376	0.014
1882	376.2	2.726	376.2	0.014
1883	376.4	2.725	376.4	0.014
1884	376.6	2.725	376.6	0.013
1885	376.8	2.724	376.8	0.013
1886	377	2.724	377	0.013
1887	377.2	2.723	377.2	0.013
1888	377.4	2.723	377.4	0.013
1889	377.6	2.722	377.6	0.013
1890	377.8	2.722	377.8	0.014
1891	378	2.721	378	0.014
1892	378.2	2.721	378.2	0.014
1893	378.4	2.721	378.4	0.014
1894	378.6	2.72	378.6	0.014
1895	378.8	2.72	378.8	0.014
1896	379	2.72	379	0.014
1897	379.2	2.72	379.2	0.014
1898	379.4	2.719	379.4	0.014
1899	379.6	2.719	379.6	0.014
1900	379.8	2.719	379.8	0.014
1901	380	2.719	380	0.014
1902	380.2	2.719	380.2	0.014
1903	380.4	2.719	380.4	0.013
1904	380.6	2.719	380.6	0.013
1905	380.8	2.719	380.8	0.013
1906	381	2.719	381	0.013
1907	381.2	2.718	381.2	0.013
1908	381.4	2.718	381.4	0.013
1909	381.6	2.717	381.6	0.013
1910	381.8	2.717	381.8	0.013
1911	382	2.717	382	0.013
1912	382.2	2.716	382.2	0.013
1913	382.4	2.715	382.4	0.013
1914	382.6	2.714	382.6	0.014
1915	382.8	2.714	382.8	0.014
1916	383	2.713	383	0.014
1917	383.2	2.713	383.2	0.014
1918	383.4	2.712	383.4	0.014
1919	383.6	2.712	383.6	0.014
1920	383.8	2.712	383.8	0.014
1921	384	2.712	384	0.013
1922	384.2	2.712	384.2	0.013
1923	384.4	2.711	384.4	0.013
1924	384.6	2.711	384.6	0.013
1925	384.8	2.711	384.8	0.013
1926	385	2.71	385	0.013
1927	385.2	2.71	385.2	0.013
1928	385.4	2.71	385.4	0.013
1929	385.6	2.709	385.6	0.014
1930	385.8	2.709	385.8	0.014
1931	386	2.708	386	0.014
1932	386.2	2.708	386.2	0.014
1933	386.4	2.707	386.4	0.015
1934	386.6	2.707	386.6	0.015
1935	386.8	2.707	386.8	0.015
1936	387	2.706	387	0.014
1937	387.2	2.706	387.2	0.014
1938	387.4	2.706	387.4	0.014
1939	387.6	2.706	387.6	0.014
1940	387.8	2.705	387.8	0.014
1941	388	2.705	388	0.014
1942	388.2	2.705	388.2	0.013
1943	388.4	2.705	388.4	0.013
1944	388.6	2.704	388.6	0.013
1945	388.8	2.704	388.8	0.013
1946	389	2.704	389	0.013
1947	389.2	2.703	389.2	0.013
1948	389.4	2.703	389.4	0.013
1949	389.6	2.703	389.6	0.013
1950	389.8	2.702	389.8	0.013
1951	390	2.702	390	0.013
1952	390.2	2.702	390.2	0.012
1953	390.4	2.702	390.4	0.012
1954	390.6	2.702	390.6	0.012
1955	390.8	2.701	390.8	0.011
1956	391	2.701	391	0.011
1957	391.2	2.701	391.2	0.011
1958	391.4	2.701	391.4	0.011
1959	391.6	2.7	391.6	0.01
1960	391.8	2.7	391.8	0.01
1961	392	2.699	392	0.01
1962	392.2	2.699	392.2	0.01
1963	392.4	2.698	392.4	0.01
1964	392.6	2.698	392.6	0.01
1965	392.8	2.698	392.8	0.01
1966	393	2.698	393	0.011
1967	393.2	2.697	393.2	0.011
1968	393.4	2.697	393.4	0.011
1969	393.6	2.697	393.6	0.011
1970	393.8	2.697	393.8	0.012
1971	394	2.697	394	0.012
1972	394.2	2.697	394.2	0.012
1973	394.4	2.697	394.4	0.012
1974	394.6	2.697	394.6	0.012
1975	394.8	2.697	394.8	0.013
1976	395	2.697	395	0.013
1977	395.2	2.697	395.2	0.013
1978	395.4	2.697	395.4	0.012
1979	395.6	2.696	395.6	0.012
1980	395.8	2.696	395.8	0.012
1981	396	2.695	396	0.011
1982	396.2	2.695	396.2	0.011
1983	396.4	2.695	396.4	0.011
1984	396.6	2.695	396.6	0.011
1985	396.8	2.694	396.8	0.01
1986	397	2.694	397	0.01
1987	397.2	2.694	397.2	0.01
1988	397.4	2.693	397.4	0.01
1989	397.6	2.693	397.6	0.01
1990	397.8	2.692	397.8	0.01
1991	398	2.692	398	0.01
1992	398.2	2.691	398.2	0.011
1993	398.4	2.691	398.4	0.011
1994	398.6	2.691	398.6	0.011
1995	398.8	2.69	398.8	0.011
1996	399	2.69	399	0.011
1997	399.2	2.69	399.2	0.011
1998	399.4	2.689	399.4	0.011
1999	399.6	2.689	399.6	0.011
[truncated: 1,151 more rows]

## Sheet: Fig 4CSupl2
		100 uM		50 nM		30 nM
1	0	0.013	0	0.001	0	0.002
2	0.2	0.012	0.2	0.002	0.2	0.004
3	0.4	0.011	0.4	0.003	0.4	0.006
4	0.6	0.01	0.6	0.003	0.6	0.008
5	0.8	0.009	0.8	0.004	0.8	0.01
6	1	0.008	1	0.004	1	0.012
7	1.2	0.008	1.2	0.005	1.2	0.013
8	1.4	0.007	1.4	0.005	1.4	0.014
9	1.6	0.007	1.6	0.006	1.6	0.014
10	1.8	0.008	1.8	0.006	1.8	0.014
11	2	0.008	2	0.006	2	0.013
12	2.2	0.009	2.2	0.006	2.2	0.012
13	2.4	0.01	2.4	0.006	2.4	0.011
14	2.6	0.01	2.6	0.006	2.6	0.01
15	2.8	0.01	2.8	0.007	2.8	0.01
16	3	0.01	3	0.007	3	0.01
17	3.2	0.01	3.2	0.007	3.2	0.01
18	3.4	0.01	3.4	0.007	3.4	0.011
19	3.6	0.011	3.6	0.007	3.6	0.011
20	3.8	0.011	3.8	0.007	3.8	0.012
21	4	0.011	4	0.006	4	0.013
22	4.2	0.011	4.2	0.006	4.2	0.013
23	4.4	0.011	4.4	0.006	4.4	0.013
24	4.6	0.011	4.6	0.006	4.6	0.014
25	4.8	0.011	4.8	0.005	4.8	0.014
26	5	0.011	5	0.005	5	0.014
27	5.2	0.011	5.2	0.005	5.2	0.013
28	5.4	0.012	5.4	0.005	5.4	0.013
29	5.6	0.012	5.6	0.005	5.6	0.012
30	5.8	0.012	5.8	0.005	5.8	0.012
31	6	0.012	6	0.005	6	0.011
32	6.2	0.012	6.2	0.006	6.2	0.011
33	6.4	0.013	6.4	0.006	6.4	0.011
34	6.6	0.013	6.6	0.006	6.6	0.011
35	6.8	0.013	6.8	0.005	6.8	0.011
36	7	0.013	7	0.006	7	0.011
37	7.2	0.013	7.2	0.006	7.2	0.011
38	7.4	0.013	7.4	0.006	7.4	0.011
39	7.6	0.013	7.6	0.006	7.6	0.011
40	7.8	0.013	7.8	0.006	7.8	0.011
41	8	0.013	8	0.005	8	0.011
42	8.2	0.012	8.2	0.005	8.2	0.011
43	8.4	0.012	8.4	0.005	8.4	0.011
44	8.6	0.011	8.6	0.005	8.6	0.011
45	8.8	0.011	8.8	0.005	8.8	0.01
46	9	0.01	9	0.005	9	0.01
47	9.2	0.01	9.2	0.006	9.2	0.01
48	9.4	0.009	9.4	0.006	9.4	0.009
49	9.6	0.009	9.6	0.006	9.6	0.009
50	9.8	0.009	9.8	0.006	9.8	0.008
51	10	0.008	10	0.006	10	0.008
52	10.2	0.008	10.2	0.006	10.2	0.008
53	10.4	0.008	10.4	0.006	10.4	0.008
54	10.6	0.008	10.6	0.006	10.6	0.008
55	10.8	0.008	10.8	0.005	10.8	0.008
56	11	0.009	11	0.005	11	0.008
57	11.2	0.008	11.2	0.005	11.2	0.008
58	11.4	0.008	11.4	0.005	11.4	0.008
59	11.6	0.008	11.6	0.004	11.6	0.008
60	11.8	0.008	11.8	0.004	11.8	0.008
61	12	0.008	12	0.005	12	0.008
62	12.2	0.008	12.2	0.005	12.2	0.008
63	12.4	0.007	12.4	0.005	12.4	0.008
64	12.6	0.007	12.6	0.005	12.6	0.008
65	12.8	0.007	12.8	0.005	12.8	0.008
66	13	0.007	13	0.006	13	0.008
67	13.2	0.006	13.2	0.006	13.2	0.007
68	13.4	0.006	13.4	0.006	13.4	0.007
69	13.6	0.006	13.6	0.006	13.6	0.007
70	13.8	0.005	13.8	0.006	13.8	0.007
71	14	0.005	14	0.006	14	0.008
72	14.2	0.005	14.2	0.006	14.2	0.008
73	14.4	0.005	14.4	0.006	14.4	0.008
74	14.6	0.005	14.6	0.005	14.6	0.008
75	14.8	0.004	14.8	0.005	14.8	0.008
76	15	0.004	15	0.004	15	0.008
77	15.2	0.004	15.2	0.004	15.2	0.008
78	15.4	0.004	15.4	0.004	15.4	0.008
79	15.6	0.004	15.6	0.004	15.6	0.008
80	15.8	0.005	15.8	0.003	15.8	0.008
81	16	0.005	16	0.003	16	0.007
82	16.2	0.005	16.2	0.003	16.2	0.007
83	16.4	0.005	16.4	0.003	16.4	0.007
84	16.6	0.005	16.6	0.003	16.6	0.006
85	16.8	0.005	16.8	0.004	16.8	0.006
86	17	0.004	17	0.004	17	0.006
87	17.2	0.004	17.2	0.004	17.2	0.006
88	17.4	0.004	17.4	0.004	17.4	0.006
89	17.6	0.005	17.6	0.004	17.6	0.006
90	17.8	0.005	17.8	0.005	17.8	0.007
91	18	0.006	18	0.005	18	0.007
92	18.2	0.006	18.2	0.005	18.2	0.007
93	18.4	0.006	18.4	0.004	18.4	0.007
94	18.6	0.006	18.6	0.004	18.6	0.007
95	18.8	0.006	18.8	0.004	18.8	0.006
96	19	0.006	19	0.003	19	0.006
97	19.2	0.005	19.2	0.003	19.2	0.005
98	19.4	0.005	19.4	0.003	19.4	0.005
99	19.6	0.005	19.6	0.003	19.6	0.004
100	19.8	0.005	19.8	0.003	19.8	0.003
101	20	0.005	20	0.002	20	0.003
102	20.2	0.004	20.2	0.002	20.2	0.002
103	20.4	0.004	20.4	0.002	20.4	0.002
104	20.6	0.004	20.6	0.002	20.6	0.002
105	20.8	0.003	20.8	0.002	20.8	0.003
106	21	0.003	21	0.002	21	0.003
107	21.2	0.003	21.2	0.002	21.2	0.003
108	21.4	0.003	21.4	0.001	21.4	0.004
109	21.6	0.003	21.6	0.002	21.6	0.004
110	21.8	0.003	21.8	0.002	21.8	0.004
111	22	0.003	22	0.002	22	0.004
112	22.2	0.003	22.2	0.002	22.2	0.004
113	22.4	0.003	22.4	0.002	22.4	0.004
114	22.6	0.002	22.6	0.002	22.6	0.004
115	22.8	0.002	22.8	0.002	22.8	0.004
116	23	0.002	23	0.002	23	0.003
117	23.2	0.002	23.2	0.002	23.2	0.002
118	23.4	0.002	23.4	0.002	23.4	0.002
119	23.6	0.002	23.6	0.002	23.6	0.001
120	23.8	0.002	23.8	0.002	23.8	0.001
121	24	0.001	24	0.002	24	0.001
122	24.2	0.001	24.2	0.002	24.2	0.001
123	24.4	0.001	24.4	0.002	24.4	0.001
124	24.6	0.001	24.6	0.002	24.6	0.001
125	24.8	0.001	24.8	0.002	24.8	0.001
126	25	0.001	25	0.002	25	0.001
127	25.2	0	25.2	0.002	25.2	0.001
128	25.4	0	25.4	0.002	25.4	0.001
129	25.6	0	25.6	0.002	25.6	0.002
130	25.8	0	25.8	0.002	25.8	0.002
131	26	0	26	0.002	26	0.003
132	26.2	0	26.2	0.001	26.2	0.003
133	26.4	0	26.4	0.001	26.4	0.003
134	26.6	0	26.6	0.001	26.6	0.003
135	26.8	0.001	26.8	0.001	26.8	0.003
136	27	0.001	27	0.001	27	0.003
137	27.2	0.001	27.2	0.001	27.2	0.003
138	27.4	0.001	27.4	0.001	27.4	0.002
139	27.6	0.001	27.6	0.001	27.6	0.002
140	27.8	0.001	27.8	0.001	27.8	0.001
141	28	0.001	28	0.001	28	0.001
142	28.2	0.001	28.2	0.001	28.2	0
143	28.4	0	28.4	0	28.4	-0.001
144	28.6	0	28.6	0	28.6	-0.001
145	28.8	0	28.8	0	28.8	-0.002
146	29	-0.001	29	-0.001	29	-0.002
147	29.2	-0.001	29.2	-0.001	29.2	-0.002
148	29.4	-0.002	29.4	-0.002	29.4	-0.002
149	29.6	-0.002	29.6	-0.002	29.6	-0.001
150	29.8	-0.002	29.8	-0.002	29.8	-0.001
151	30	0.046	30	0	30	0.018
152	30.2	0.062	30.2	0.008	30.2	0.031
153	30.4	0.078	30.4	0.017	30.4	0.044
154	30.6	0.095	30.6	0.026	30.6	0.057
155	30.8	0.112	30.8	0.035	30.8	0.069
156	31	0.128	31	0.044	31	0.081
157	31.2	0.143	31.2	0.052	31.2	0.091
158	31.4	0.156	31.4	0.06	31.4	0.1
159	31.6	0.167	31.6	0.067	31.6	0.107
160	31.8	0.176	31.8	0.073	31.8	0.111
161	32	0.181	32	0.077	32	0.113
162	32.2	0.183	32.2	0.08	32.2	0.111
163	32.4	0.186	32.4	0.084	32.4	0.111
164	32.6	0.189	32.6	0.088	32.6	0.111
165	32.8	0.192	32.8	0.092	32.8	0.111
166	33	0.194	33	0.095	33	0.111
167	33.2	0.197	33.2	0.099	33.2	0.112
168	33.4	0.2	33.4	0.103	33.4	0.113
169	33.6	0.204	33.6	0.107	33.6	0.113
170	33.8	0.206	33.8	0.111	33.8	0.114
171	34	0.209	34	0.115	34	0.114
172	34.2	0.211	34.2	0.119	34.2	0.115
173	34.4	0.214	34.4	0.122	34.4	0.115
174	34.6	0.216	34.6	0.125	34.6	0.115
175	34.8	0.218	34.8	0.128	34.8	0.116
176	35	0.22	35	0.131	35	0.116
177	35.2	0.222	35.2	0.133	35.2	0.116
178	35.4	0.224	35.4	0.135	35.4	0.117
179	35.6	0.226	35.6	0.137	35.6	0.118
180	35.8	0.228	35.8	0.14	35.8	0.118
181	36	0.23	36	0.142	36	0.119
182	36.2	0.232	36.2	0.145	36.2	0.12
183	36.4	0.234	36.4	0.147	36.4	0.121
184	36.6	0.235	36.6	0.149	36.6	0.122
185	36.8	0.238	36.8	0.151	36.8	0.122
186	37	0.24	37	0.153	37	0.123
187	37.2	0.242	37.2	0.155	37.2	0.124
188	37.4	0.244	37.4	0.158	37.4	0.124
189	37.6	0.246	37.6	0.16	37.6	0.124
190	37.8	0.248	37.8	0.162	37.8	0.125
191	38	0.249	38	0.164	38	0.126
192	38.2	0.251	38.2	0.167	38.2	0.126
193	38.4	0.253	38.4	0.169	38.4	0.127
194	38.6	0.254	38.6	0.171	38.6	0.128
195	38.8	0.256	38.8	0.172	38.8	0.129
196	39	0.257	39	0.174	39	0.13
197	39.2	0.258	39.2	0.176	39.2	0.13
198	39.4	0.259	39.4	0.178	39.4	0.131
199	39.6	0.26	39.6	0.179	39.6	0.132
200	39.8	0.262	39.8	0.181	39.8	0.133
201	40	0.263	40	0.183	40	0.134
202	40.2	0.264	40.2	0.185	40.2	0.134
203	40.4	0.266	40.4	0.186	40.4	0.134
204	40.6	0.268	40.6	0.188	40.6	0.135
205	40.8	0.27	40.8	0.19	40.8	0.135
206	41	0.272	41	0.191	41	0.136
207	41.2	0.274	41.2	0.193	41.2	0.136
208	41.4	0.276	41.4	0.194	41.4	0.137
209	41.6	0.277	41.6	0.196	41.6	0.138
210	41.8	0.279	41.8	0.198	41.8	0.139
211	42	0.28	42	0.199	42	0.14
212	42.2	0.282	42.2	0.201	42.2	0.141
213	42.4	0.283	42.4	0.202	42.4	0.142
214	42.6	0.284	42.6	0.204	42.6	0.143
215	42.8	0.285	42.8	0.205	42.8	0.143
216	43	0.286	43	0.207	43	0.144
217	43.2	0.287	43.2	0.208	43.2	0.144
218	43.4	0.288	43.4	0.21	43.4	0.144
219	43.6	0.289	43.6	0.211	43.6	0.144
220	43.8	0.29	43.8	0.212	43.8	0.144
221	44	0.292	44	0.213	44	0.144
222	44.2	0.293	44.2	0.214	44.2	0.143
223	44.4	0.294	44.4	0.215	44.4	0.143
224	44.6	0.295	44.6	0.216	44.6	0.143
225	44.8	0.296	44.8	0.217	44.8	0.143
226	45	0.297	45	0.218	45	0.143
227	45.2	0.298	45.2	0.219	45.2	0.143
228	45.4	0.299	45.4	0.219	45.4	0.143
229	45.6	0.3	45.6	0.22	45.6	0.144
230	45.8	0.302	45.8	0.221	45.8	0.145
231	46	0.303	46	0.222	46	0.146
232	46.2	0.304	46.2	0.223	46.2	0.146
233	46.4	0.305	46.4	0.225	46.4	0.147
234	46.6	0.305	46.6	0.226	46.6	0.148
235	46.8	0.306	46.8	0.227	46.8	0.149
236	47	0.308	47	0.228	47	0.15
237	47.2	0.309	47.2	0.23	47.2	0.151
238	47.4	0.31	47.4	0.231	47.4	0.151
239	47.6	0.312	47.6	0.232	47.6	0.152
240	47.8	0.313	47.8	0.233	47.8	0.152
241	48	0.314	48	0.234	48	0.152
242	48.2	0.315	48.2	0.235	48.2	0.153
243	48.4	0.316	48.4	0.236	48.4	0.153
244	48.6	0.318	48.6	0.238	48.6	0.153
245	48.8	0.319	48.8	0.239	48.8	0.153
246	49	0.32	49	0.24	49	0.154
247	49.2	0.321	49.2	0.241	49.2	0.155
248	49.4	0.322	49.4	0.242	49.4	0.155
249	49.6	0.323	49.6	0.242	49.6	0.156
250	49.8	0.324	49.8	0.243	49.8	0.156
251	50	0.325	50	0.243	50	0.156
252	50.2	0.326	50.2	0.244	50.2	0.157
253	50.4	0.326	50.4	0.245	50.4	0.157
254	50.6	0.327	50.6	0.245	50.6	0.157
255	50.8	0.327	50.8	0.246	50.8	0.157
256	51	0.328	51	0.247	51	0.157
257	51.2	0.329	51.2	0.247	51.2	0.157
258	51.4	0.33	51.4	0.248	51.4	0.157
259	51.6	0.331	51.6	0.249	51.6	0.157
260	51.8	0.331	51.8	0.25	51.8	0.157
261	52	0.332	52	0.252	52	0.157
262	52.2	0.334	52.2	0.253	52.2	0.157
263	52.4	0.335	52.4	0.254	52.4	0.157
264	52.6	0.336	52.6	0.255	52.6	0.158
265	52.8	0.337	52.8	0.256	52.8	0.158
266	53	0.338	53	0.256	53	0.159
267	53.2	0.339	53.2	0.256	53.2	0.16
268	53.4	0.34	53.4	0.257	53.4	0.16
269	53.6	0.342	53.6	0.257	53.6	0.161
270	53.8	0.343	53.8	0.257	53.8	0.162
271	54	0.344	54	0.258	54	0.163
272	54.2	0.345	54.2	0.258	54.2	0.163
273	54.4	0.346	54.4	0.259	54.4	0.164
274	54.6	0.347	54.6	0.259	54.6	0.164
275	54.8	0.348	54.8	0.26	54.8	0.164
276	55	0.349	55	0.26	55	0.164
277	55.2	0.35	55.2	0.261	55.2	0.164
278	55.4	0.351	55.4	0.261	55.4	0.164
279	55.6	0.351	55.6	0.262	55.6	0.164
280	55.8	0.352	55.8	0.263	55.8	0.164
281	56	0.352	56	0.263	56	0.164
282	56.2	0.353	56.2	0.264	56.2	0.164
283	56.4	0.353	56.4	0.264	56.4	0.164
284	56.6	0.354	56.6	0.265	56.6	0.164
285	56.8	0.354	56.8	0.265	56.8	0.165
286	57	0.354	57	0.265	57	0.165
287	57.2	0.355	57.2	0.266	57.2	0.165
288	57.4	0.355	57.4	0.266	57.4	0.166
289	57.6	0.355	57.6	0.267	57.6	0.166
290	57.8	0.356	57.8	0.267	57.8	0.167
291	58	0.357	58	0.268	58	0.168
292	58.2	0.359	58.2	0.268	58.2	0.168
293	58.4	0.36	58.4	0.268	58.4	0.169
294	58.6	0.361	58.6	0.268	58.6	0.17
295	58.8	0.362	58.8	0.269	58.8	0.17
296	59	0.363	59	0.269	59	0.171
297	59.2	0.364	59.2	0.27	59.2	0.171
298	59.4	0.365	59.4	0.27	59.4	0.172
299	59.6	0.366	59.6	0.271	59.6	0.172
300	59.8	0.367	59.8	0.272	59.8	0.172
301	60	0.368	60	0.273	60	0.172
302	60.2	0.368	60.2	0.273	60.2	0.172
303	60.4	0.369	60.4	0.274	60.4	0.172
304	60.6	0.369	60.6	0.275	60.6	0.172
305	60.8	0.37	60.8	0.275	60.8	0.172
306	61	0.37	61	0.276	61	0.172
307	61.2	0.371	61.2	0.276	61.2	0.172
308	61.4	0.372	61.4	0.277	61.4	0.172
309	61.6	0.373	61.6	0.278	61.6	0.172
310	61.8	0.374	61.8	0.278	61.8	0.172
311	62	0.375	62	0.279	62	0.172
312	62.2	0.375	62.2	0.279	62.2	0.172
313	62.4	0.376	62.4	0.28	62.4	0.172
314	62.6	0.377	62.6	0.28	62.6	0.172
315	62.8	0.377	62.8	0.281	62.8	0.172
316	63	0.378	63	0.282	63	0.172
317	63.2	0.378	63.2	0.283	63.2	0.172
318	63.4	0.379	63.4	0.283	63.4	0.172
319	63.6	0.379	63.6	0.284	63.6	0.172
320	63.8	0.38	63.8	0.284	63.8	0.172
321	64	0.38	64	0.285	64	0.172
322	64.2	0.381	64.2	0.285	64.2	0.172
323	64.4	0.381	64.4	0.286	64.4	0.172
324	64.6	0.382	64.6	0.287	64.6	0.172
325	64.8	0.383	64.8	0.287	64.8	0.172
326	65	0.384	65	0.288	65	0.173
327	65.2	0.386	65.2	0.288	65.2	0.173
328	65.4	0.387	65.4	0.289	65.4	0.173
329	65.6	0.388	65.6	0.289	65.6	0.174
330	65.8	0.389	65.8	0.29	65.8	0.175
331	66	0.39	66	0.291	66	0.175
332	66.2	0.391	66.2	0.291	66.2	0.176
333	66.4	0.391	66.4	0.292	66.4	0.176
334	66.6	0.392	66.6	0.292	66.6	0.176
335	66.8	0.393	66.8	0.292	66.8	0.176
336	67	0.393	67	0.293	67	0.177
337	67.2	0.393	67.2	0.293	67.2	0.177
338	67.4	0.394	67.4	0.294	67.4	0.177
339	67.6	0.394	67.6	0.294	67.6	0.177
340	67.8	0.395	67.8	0.295	67.8	0.177
341	68	0.395	68	0.295	68	0.178
342	68.2	0.396	68.2	0.296	68.2	0.178
343	68.4	0.396	68.4	0.296	68.4	0.178
344	68.6	0.397	68.6	0.297	68.6	0.179
345	68.8	0.397	68.8	0.298	68.8	0.179
346	69	0.398	69	0.298	69	0.18
347	69.2	0.398	69.2	0.299	69.2	0.18
348	69.4	0.399	69.4	0.3	69.4	0.181
349	69.6	0.399	69.6	0.3	69.6	0.181
350	69.8	0.4	69.8	0.3	69.8	0.181
351	70	0.4	70	0.301	70	0.181
352	70.2	0.401	70.2	0.301	70.2	0.181
353	70.4	0.402	70.4	0.301	70.4	0.181
354	70.6	0.402	70.6	0.301	70.6	0.181
355	70.8	0.402	70.8	0.302	70.8	0.181
356	71	0.403	71	0.302	71	0.181
357	71.2	0.403	71.2	0.303	71.2	0.181
358	71.4	0.404	71.4	0.304	71.4	0.181
359	71.6	0.405	71.6	0.304	71.6	0.181
360	71.8	0.406	71.8	0.304	71.8	0.181
361	72	0.407	72	0.305	72	0.181
362	72.2	0.409	72.2	0.305	72.2	0.181
363	72.4	0.41	72.4	0.306	72.4	0.181
364	72.6	0.41	72.6	0.307	72.6	0.181
365	72.8	0.411	72.8	0.308	72.8	0.181
366	73	0.412	73	0.308	73	0.181
367	73.2	0.413	73.2	0.309	73.2	0.181
368	73.4	0.414	73.4	0.309	73.4	0.181
369	73.6	0.414	73.6	0.309	73.6	0.181
370	73.8	0.415	73.8	0.309	73.8	0.181
371	74	0.415	74	0.309	74	0.181
372	74.2	0.416	74.2	0.309	74.2	0.182
373	74.4	0.416	74.4	0.309	74.4	0.182
374	74.6	0.416	74.6	0.309	74.6	0.183
375	74.8	0.416	74.8	0.31	74.8	0.183
376	75	0.416	75	0.31	75	0.184
377	75.2	0.417	75.2	0.31	75.2	0.184
378	75.4	0.417	75.4	0.311	75.4	0.185
379	75.6	0.418	75.6	0.311	75.6	0.185
380	75.8	0.418	75.8	0.311	75.8	0.186
381	76	0.418	76	0.312	76	0.186
382	76.2	0.418	76.2	0.312	76.2	0.186
383	76.4	0.419	76.4	0.313	76.4	0.186
384	76.6	0.42	76.6	0.313	76.6	0.186
385	76.8	0.421	76.8	0.313	76.8	0.186
386	77	0.422	77	0.313	77	0.186
387	77.2	0.423	77.2	0.313	77.2	0.186
388	77.4	0.424	77.4	0.314	77.4	0.185
389	77.6	0.424	77.6	0.314	77.6	0.185
390	77.8	0.425	77.8	0.314	77.8	0.185
391	78	0.425	78	0.315	78	0.185
392	78.2	0.426	78.2	0.315	78.2	0.185
393	78.4	0.427	78.4	0.315	78.4	0.185
394	78.6	0.427	78.6	0.316	78.6	0.186
395	78.8	0.428	78.8	0.316	78.8	0.186
396	79	0.429	79	0.317	79	0.187
397	79.2	0.43	79.2	0.317	79.2	0.187
398	79.4	0.43	79.4	0.318	79.4	0.188
399	79.6	0.43	79.6	0.319	79.6	0.188
400	79.8	0.43	79.8	0.319	79.8	0.189
401	80	0.43	80	0.32	80	0.189
402	80.2	0.431	80.2	0.32	80.2	0.189
403	80.4	0.433	80.4	0.32	80.4	0.19
404	80.6	0.434	80.6	0.32	80.6	0.19
405	80.8	0.434	80.8	0.321	80.8	0.19
406	81	0.435	81	0.321	81	0.19
407	81.2	0.435	81.2	0.322	81.2	0.19
408	81.4	0.435	81.4	0.322	81.4	0.19
409	81.6	0.434	81.6	0.323	81.6	0.19
410	81.8	0.434	81.8	0.323	81.8	0.191
411	82	0.435	82	0.323	82	0.191
412	82.2	0.435	82.2	0.324	82.2	0.192
413	82.4	0.436	82.4	0.324	82.4	0.192
414	82.6	0.437	82.6	0.323	82.6	0.192
415	82.8	0.438	82.8	0.324	82.8	0.192
416	83	0.439	83	0.324	83	0.192
417	83.2	0.44	83.2	0.324	83.2	0.192
418	83.4	0.44	83.4	0.324	83.4	0.192
419	83.6	0.441	83.6	0.325	83.6	0.192
420	83.8	0.442	83.8	0.325	83.8	0.191
421	84	0.443	84	0.325	84	0.191
422	84.2	0.443	84.2	0.325	84.2	0.19
423	84.4	0.443	84.4	0.326	84.4	0.19
424	84.6	0.443	84.6	0.326	84.6	0.19
425	84.8	0.443	84.8	0.327	84.8	0.19
426	85	0.442	85	0.327	85	0.191
427	85.2	0.441	85.2	0.327	85.2	0.191
428	85.4	0.441	85.4	0.328	85.4	0.192
429	85.6	0.44	85.6	0.328	85.6	0.192
430	85.8	0.44	85.8	0.328	85.8	0.193
431	86	0.44	86	0.329	86	0.193
432	86.2	0.44	86.2	0.329	86.2	0.193
433	86.4	0.441	86.4	0.329	86.4	0.193
434	86.6	0.442	86.6	0.33	86.6	0.193
435	86.8	0.442	86.8	0.33	86.8	0.193
436	87	0.443	87	0.33	87	0.193
437	87.2	0.444	87.2	0.331	87.2	0.194
438	87.4	0.445	87.4	0.332	87.4	0.193
439	87.6	0.446	87.6	0.332	87.6	0.193
440	87.8	0.448	87.8	0.332	87.8	0.193
441	88	0.449	88	0.333	88	0.193
442	88.2	0.451	88.2	0.333	88.2	0.193
443	88.4	0.452	88.4	0.333	88.4	0.193
444	88.6	0.453	88.6	0.333	88.6	0.194
445	88.8	0.453	88.8	0.333	88.8	0.194
446	89	0.454	89	0.334	89	0.195
447	89.2	0.454	89.2	0.334	89.2	0.196
448	89.4	0.454	89.4	0.334	89.4	0.196
449	89.6	0.454	89.6	0.334	89.6	0.197
450	89.8	0.454	89.8	0.334	89.8	0.197
451	90	0.455	90	0.334	90	0.197
452	90.2	0.455	90.2	0.334	90.2	0.197
453	90.4	0.455	90.4	0.334	90.4	0.197
454	90.6	0.455	90.6	0.334	90.6	0.197
455	90.8	0.455	90.8	0.334	90.8	0.197
456	91	0.456	91	0.334	91	0.197
457	91.2	0.456	91.2	0.334	91.2	0.197
458	91.4	0.456	91.4	0.334	91.4	0.197
459	91.6	0.457	91.6	0.335	91.6	0.196
460	91.8	0.457	91.8	0.335	91.8	0.196
461	92	0.458	92	0.336	92	0.196
462	92.2	0.458	92.2	0.337	92.2	0.196
463	92.4	0.458	92.4	0.337	92.4	0.196
464	92.6	0.458	92.6	0.338	92.6	0.196
465	92.8	0.458	92.8	0.339	92.8	0.197
466	93	0.458	93	0.34	93	0.197
467	93.2	0.458	93.2	0.341	93.2	0.197
468	93.4	0.458	93.4	0.341	93.4	0.198
469	93.6	0.458	93.6	0.341	93.6	0.198
470	93.8	0.458	93.8	0.341	93.8	0.198
471	94	0.458	94	0.341	94	0.198
472	94.2	0.457	94.2	0.341	94.2	0.198
473	94.4	0.457	94.4	0.341	94.4	0.198
474	94.6	0.456	94.6	0.341	94.6	0.199
475	94.8	0.456	94.8	0.341	94.8	0.199
476	95	0.456	95	0.341	95	0.2
477	95.2	0.455	95.2	0.341	95.2	0.2
478	95.4	0.455	95.4	0.341	95.4	0.201
479	95.6	0.456	95.6	0.342	95.6	0.201
480	95.8	0.456	95.8	0.342	95.8	0.201
481	96	0.456	96	0.343	96	0.201
482	96.2	0.456	96.2	0.343	96.2	0.202
483	96.4	0.457	96.4	0.343	96.4	0.202
484	96.6	0.457	96.6	0.343	96.6	0.202
485	96.8	0.457	96.8	0.343	96.8	0.203
486	97	0.458	97	0.344	97	0.202
487	97.2	0.458	97.2	0.344	97.2	0.202
488	97.4	0.459	97.4	0.344	97.4	0.202
489	97.6	0.46	97.6	0.344	97.6	0.202
490	97.8	0.46	97.8	0.344	97.8	0.201
491	98	0.46	98	0.345	98	0.201
492	98.2	0.46	98.2	0.345	98.2	0.201
493	98.4	0.461	98.4	0.345	98.4	0.202
494	98.6	0.461	98.6	0.345	98.6	0.202
495	98.8	0.462	98.8	0.345	98.8	0.203
496	99	0.463	99	0.346	99	0.203
497	99.2	0.463	99.2	0.347	99.2	0.203
498	99.4	0.463	99.4	0.347	99.4	0.204
499	99.6	0.463	99.6	0.348	99.6	0.204
500	99.8	0.463	99.8	0.348	99.8	0.204
501	100	0.463	100	0.348	100	0.204
502	100.2	0.463	100.2	0.348	100.2	0.204
503	100.4	0.464	100.4	0.349	100.4	0.204
504	100.6	0.465	100.6	0.349	100.6	0.204
505	100.8	0.466	100.8	0.349	100.8	0.204
506	101	0.467	101	0.35	101	0.204
507	101.2	0.468	101.2	0.35	101.2	0.204
508	101.4	0.468	101.4	0.35	101.4	0.204
509	101.6	0.469	101.6	0.35	101.6	0.205
510	101.8	0.469	101.8	0.35	101.8	0.205
511	102	0.47	102	0.35	102	0.206
512	102.2	0.471	102.2	0.35	102.2	0.206
513	102.4	0.472	102.4	0.35	102.4	0.206
514	102.6	0.472	102.6	0.351	102.6	0.206
515	102.8	0.473	102.8	0.351	102.8	0.207
516	103	0.473	103	0.352	103	0.207
517	103.2	0.473	103.2	0.352	103.2	0.207
518	103.4	0.474	103.4	0.353	103.4	0.207
519	103.6	0.474	103.6	0.353	103.6	0.207
520	103.8	0.474	103.8	0.353	103.8	0.207
521	104	0.475	104	0.353	104	0.206
522	104.2	0.475	104.2	0.353	104.2	0.206
523	104.4	0.476	104.4	0.353	104.4	0.206
524	104.6	0.476	104.6	0.353	104.6	0.206
525	104.8	0.477	104.8	0.352	104.8	0.206
526	105	0.477	105	0.352	105	0.206
527	105.2	0.477	105.2	0.351	105.2	0.206
528	105.4	0.477	105.4	0.351	105.4	0.207
529	105.6	0.477	105.6	0.351	105.6	0.207
530	105.8	0.477	105.8	0.351	105.8	0.207
531	106	0.478	106	0.351	106	0.207
532	106.2	0.479	106.2	0.351	106.2	0.207
533	106.4	0.479	106.4	0.351	106.4	0.207
534	106.6	0.48	106.6	0.351	106.6	0.207
535	106.8	0.48	106.8	0.351	106.8	0.207
536	107	0.481	107	0.352	107	0.207
537	107.2	0.481	107.2	0.353	107.2	0.208
538	107.4	0.481	107.4	0.353	107.4	0.208
539	107.6	0.481	107.6	0.354	107.6	0.208
540	107.8	0.48	107.8	0.355	107.8	0.208
541	108	0.48	108	0.355	108	0.208
542	108.2	0.48	108.2	0.356	108.2	0.207
543	108.4	0.48	108.4	0.356	108.4	0.207
544	108.6	0.479	108.6	0.356	108.6	0.207
545	108.8	0.479	108.8	0.356	108.8	0.207
546	109	0.479	109	0.355	109	0.207
547	109.2	0.479	109.2	0.355	109.2	0.207
548	109.4	0.479	109.4	0.355	109.4	0.208
549	109.6	0.479	109.6	0.355	109.6	0.208
550	109.8	0.48	109.8	0.355	109.8	0.209
551	110	0.48	110	0.356	110	0.209
552	110.2	0.481	110.2	0.356	110.2	0.209
553	110.4	0.482	110.4	0.356	110.4	0.21
554	110.6	0.482	110.6	0.356	110.6	0.21
555	110.8	0.483	110.8	0.356	110.8	0.211
556	111	0.484	111	0.356	111	0.211
557	111.2	0.484	111.2	0.356	111.2	0.212
558	111.4	0.485	111.4	0.357	111.4	0.212
559	111.6	0.486	111.6	0.357	111.6	0.212
560	111.8	0.487	111.8	0.357	111.8	0.212
561	112	0.487	112	0.357	112	0.212
562	112.2	0.488	112.2	0.357	112.2	0.211
563	112.4	0.489	112.4	0.357	112.4	0.211
564	112.6	0.49	112.6	0.357	112.6	0.211
565	112.8	0.49	112.8	0.358	112.8	0.21
566	113	0.49	113	0.358	113	0.21
567	113.2	0.491	113.2	0.358	113.2	0.21
568	113.4	0.49	113.4	0.358	113.4	0.21
569	113.6	0.49	113.6	0.359	113.6	0.21
570	113.8	0.49	113.8	0.359	113.8	0.21
571	114	0.49	114	0.359	114	0.21
572	114.2	0.49	114.2	0.359	114.2	0.211
573	114.4	0.49	114.4	0.359	114.4	0.211
574	114.6	0.491	114.6	0.359	114.6	0.211
575	114.8	0.491	114.8	0.36	114.8	0.212
576	115	0.492	115	0.36	115	0.212
577	115.2	0.492	115.2	0.36	115.2	0.213
578	115.4	0.493	115.4	0.36	115.4	0.213
579	115.6	0.493	115.6	0.361	115.6	0.213
580	115.8	0.493	115.8	0.361	115.8	0.213
581	116	0.494	116	0.362	116	0.213
582	116.2	0.494	116.2	0.363	116.2	0.213
583	116.4	0.495	116.4	0.363	116.4	0.213
584	116.6	0.495	116.6	0.363	116.6	0.213
585	116.8	0.495	116.8	0.363	116.8	0.213
586	117	0.494	117	0.364	117	0.213
587	117.2	0.494	117.2	0.363	117.2	0.213
588	117.4	0.494	117.4	0.363	117.4	0.213
589	117.6	0.494	117.6	0.363	117.6	0.213
590	117.8	0.494	117.8	0.363	117.8	0.213
591	118	0.495	118	0.362	118	0.214
592	118.2	0.495	118.2	0.362	118.2	0.214
593	118.4	0.496	118.4	0.362	118.4	0.214
594	118.6	0.497	118.6	0.362	118.6	0.215
595	118.8	0.498	118.8	0.363	118.8	0.215
596	119	0.498	119	0.363	119	0.215
597	119.2	0.499	119.2	0.363	119.2	0.215
598	119.4	0.499	119.4	0.363	119.4	0.215
599	119.6	0.499	119.6	0.363	119.6	0.215
600	119.8	0.499	119.8	0.364	119.8	0.215
601	120	0.499	120	0.364	120	0.216
602	120.2	0.499	120.2	0.364	120.2	0.216
603	120.4	0.499	120.4	0.364	120.4	0.216
604	120.6	0.499	120.6	0.364	120.6	0.216
605	120.8	0.498	120.8	0.364	120.8	0.216
606	121	0.498	121	0.365	121	0.216
607	121.2	0.498	121.2	0.365	121.2	0.216
608	121.4	0.498	121.4	0.364	121.4	0.216
609	121.6	0.498	121.6	0.364	121.6	0.216
610	121.8	0.498	121.8	0.364	121.8	0.216
611	122	0.499	122	0.365	122	0.216
612	122.2	0.5	122.2	0.365	122.2	0.216
613	122.4	0.5	122.4	0.365	122.4	0.217
614	122.6	0.501	122.6	0.366	122.6	0.217
615	122.8	0.502	122.8	0.366	122.8	0.217
616	123	0.503	123	0.367	123	0.217
617	123.2	0.503	123.2	0.367	123.2	0.217
618	123.4	0.504	123.4	0.367	123.4	0.217
619	123.6	0.504	123.6	0.367	123.6	0.217
620	123.8	0.505	123.8	0.367	123.8	0.217
621	124	0.505	124	0.367	124	0.218
622	124.2	0.506	124.2	0.367	124.2	0.218
623	124.4	0.506	124.4	0.367	124.4	0.218
624	124.6	0.507	124.6	0.367	124.6	0.218
625	124.8	0.507	124.8	0.367	124.8	0.218
626	125	0.508	125	0.367	125	0.218
627	125.2	0.509	125.2	0.367	125.2	0.218
628	125.4	0.509	125.4	0.366	125.4	0.218
629	125.6	0.509	125.6	0.366	125.6	0.217
630	125.8	0.51	125.8	0.366	125.8	0.217
631	126	0.51	126	0.366	126	0.216
632	126.2	0.511	126.2	0.366	126.2	0.216
633	126.4	0.511	126.4	0.367	126.4	0.216
634	126.6	0.511	126.6	0.367	126.6	0.216
635	126.8	0.511	126.8	0.367	126.8	0.216
636	127	0.511	127	0.368	127	0.216
637	127.2	0.511	127.2	0.368	127.2	0.216
638	127.4	0.512	127.4	0.369	127.4	0.216
639	127.6	0.512	127.6	0.369	127.6	0.217
640	127.8	0.512	127.8	0.369	127.8	0.217
641	128	0.513	128	0.37	128	0.218
642	128.2	0.513	128.2	0.37	128.2	0.218
643	128.4	0.514	128.4	0.37	128.4	0.219
644	128.6	0.514	128.6	0.37	128.6	0.219
645	128.8	0.514	128.8	0.37	128.8	0.219
646	129	0.513	129	0.37	129	0.219
647	129.2	0.513	129.2	0.37	129.2	0.219
648	129.4	0.513	129.4	0.37	129.4	0.219
649	129.6	0.513	129.6	0.369	129.6	0.219
650	129.8	0.513	129.8	0.369	129.8	0.22
651	130	0.513	130	0.369	130	0.22
652	130.2	0.514	130.2	0.369	130.2	0.22
653	130.4	0.514	130.4	0.369	130.4	0.22
654	130.6	0.514	130.6	0.369	130.6	0.221
655	130.8	0.515	130.8	0.37	130.8	0.221
656	131	0.516	131	0.37	131	0.221
657	131.2	0.516	131.2	0.371	131.2	0.221
658	131.4	0.517	131.4	0.372	131.4	0.221
659	131.6	0.518	131.6	0.373	131.6	0.221
660	131.8	0.518	131.8	0.373	131.8	0.221
661	132	0.518	132	0.374	132	0.221
662	132.2	0.519	132.2	0.374	132.2	0.221
663	132.4	0.519	132.4	0.374	132.4	0.221
664	132.6	0.519	132.6	0.374	132.6	0.221
665	132.8	0.519	132.8	0.374	132.8	0.221
666	133	0.519	133	0.374	133	0.221
667	133.2	0.519	133.2	0.374	133.2	0.22
668	133.4	0.52	133.4	0.374	133.4	0.221
669	133.6	0.521	133.6	0.374	133.6	0.221
670	133.8	0.521	133.8	0.373	133.8	0.221
671	134	0.522	134	0.373	134	0.221
672	134.2	0.522	134.2	0.373	134.2	0.221
673	134.4	0.523	134.4	0.373	134.4	0.221
674	134.6	0.523	134.6	0.373	134.6	0.221
675	134.8	0.523	134.8	0.373	134.8	0.221
676	135	0.523	135	0.374	135	0.222
677	135.2	0.524	135.2	0.374	135.2	0.222
678	135.4	0.524	135.4	0.374	135.4	0.222
679	135.6	0.524	135.6	0.374	135.6	0.222
680	135.8	0.524	135.8	0.374	135.8	0.222
681	136	0.524	136	0.374	136	0.222
682	136.2	0.525	136.2	0.374	136.2	0.222
683	136.4	0.525	136.4	0.374	136.4	0.222
684	136.6	0.526	136.6	0.374	136.6	0.222
685	136.8	0.527	136.8	0.374	136.8	0.222
686	137	0.527	137	0.374	137	0.222
687	137.2	0.528	137.2	0.374	137.2	0.222
688	137.4	0.528	137.4	0.374	137.4	0.222
689	137.6	0.529	137.6	0.375	137.6	0.222
690	137.8	0.529	137.8	0.376	137.8	0.222
691	138	0.528	138	0.376	138	0.223
692	138.2	0.528	138.2	0.377	138.2	0.223
693	138.4	0.528	138.4	0.377	138.4	0.223
694	138.6	0.528	138.6	0.378	138.6	0.223
695	138.8	0.528	138.8	0.378	138.8	0.223
696	139	0.528	139	0.379	139	0.223
697	139.2	0.529	139.2	0.379	139.2	0.224
698	139.4	0.529	139.4	0.379	139.4	0.224
699	139.6	0.529	139.6	0.379	139.6	0.224
700	139.8	0.529	139.8	0.378	139.8	0.224
701	140	0.529	140	0.378	140	0.224
702	140.2	0.53	140.2	0.377	140.2	0.224
703	140.4	0.531	140.4	0.377	140.4	0.224
704	140.6	0.532	140.6	0.377	140.6	0.224
705	140.8	0.532	140.8	0.377	140.8	0.225
706	141	0.533	141	0.377	141	0.225
707	141.2	0.533	141.2	0.377	141.2	0.225
708	141.4	0.533	141.4	0.377	141.4	0.225
709	141.6	0.533	141.6	0.377	141.6	0.225
710	141.8	0.533	141.8	0.377	141.8	0.225
711	142	0.533	142	0.377	142	0.225
712	142.2	0.533	142.2	0.377	142.2	0.225
713	142.4	0.534	142.4	0.377	142.4	0.225
714	142.6	0.534	142.6	0.376	142.6	0.226
715	142.8	0.534	142.8	0.376	142.8	0.226
716	143	0.534	143	0.376	143	0.226
717	143.2	0.534	143.2	0.375	143.2	0.226
718	143.4	0.535	143.4	0.375	143.4	0.226
719	143.6	0.535	143.6	0.375	143.6	0.226
720	143.8	0.535	143.8	0.375	143.8	0.226
721	144	0.536	144	0.376	144	0.226
722	144.2	0.537	144.2	0.376	144.2	0.226
723	144.4	0.538	144.4	0.377	144.4	0.226
724	144.6	0.538	144.6	0.377	144.6	0.226
725	144.8	0.539	144.8	0.378	144.8	0.226
726	145	0.54	145	0.379	145	0.226
727	145.2	0.54	145.2	0.379	145.2	0.226
728	145.4	0.54	145.4	0.379	145.4	0.226
729	145.6	0.54	145.6	0.38	145.6	0.226
730	145.8	0.54	145.8	0.38	145.8	0.227
731	146	0.54	146	0.38	146	0.227
732	146.2	0.54	146.2	0.38	146.2	0.228
733	146.4	0.54	146.4	0.379	146.4	0.228
734	146.6	0.54	146.6	0.379	146.6	0.228
735	146.8	0.54	146.8	0.379	146.8	0.229
736	147	0.54	147	0.379	147	0.229
737	147.2	0.54	147.2	0.379	147.2	0.228
738	147.4	0.541	147.4	0.379	147.4	0.228
739	147.6	0.541	147.6	0.379	147.6	0.228
740	147.8	0.542	147.8	0.38	147.8	0.228
741	148	0.542	148	0.38	148	0.228
742	148.2	0.543	148.2	0.38	148.2	0.228
743	148.4	0.543	148.4	0.38	148.4	0.228
744	148.6	0.543	148.6	0.381	148.6	0.228
745	148.8	0.543	148.8	0.381	148.8	0.228
746	149	0.544	149	0.381	149	0.228
747	149.2	0.544	149.2	0.381	149.2	0.228
748	149.4	0.544	149.4	0.381	149.4	0.228
749	149.6	0.545	149.6	0.381	149.6	0.229
750	149.8	0.545	149.8	0.381	149.8	0.229
751	150	0.545	150	0.381	150	0.23
752	150.2	0.546	150.2	0.381	150.2	0.23
753	150.4	0.546	150.4	0.382	150.4	0.231
754	150.6	0.546	150.6	0.382	150.6	0.231
755	150.8	0.546	150.8	0.383	150.8	0.231
756	151	0.547	151	0.383	151	0.231
757	151.2	0.547	151.2	0.384	151.2	0.231
758	151.4	0.548	151.4	0.384	151.4	0.231
759	151.6	0.548	151.6	0.385	151.6	0.231
760	151.8	0.548	151.8	0.385	151.8	0.231
761	152	0.548	152	0.385	152	0.231
762	152.2	0.548	152.2	0.385	152.2	0.231
763	152.4	0.548	152.4	0.386	152.4	0.231
764	152.6	0.548	152.6	0.386	152.6	0.231
765	152.8	0.549	152.8	0.386	152.8	0.231
766	153	0.549	153	0.386	153	0.231
767	153.2	0.549	153.2	0.386	153.2	0.232
768	153.4	0.549	153.4	0.386	153.4	0.232
769	153.6	0.549	153.6	0.386	153.6	0.232
770	153.8	0.549	153.8	0.386	153.8	0.233
771	154	0.55	154	0.386	154	0.233
772	154.2	0.55	154.2	0.386	154.2	0.233
773	154.4	0.551	154.4	0.386	154.4	0.232
774	154.6	0.551	154.6	0.386	154.6	0.232
775	154.8	0.552	154.8	0.386	154.8	0.232
776	155	0.552	155	0.386	155	0.232
777	155.2	0.553	155.2	0.386	155.2	0.232
778	155.4	0.554	155.4	0.387	155.4	0.232
779	155.6	0.554	155.6	0.386	155.6	0.232
780	155.8	0.554	155.8	0.386	155.8	0.232
781	156	0.554	156	0.386	156	0.232
782	156.2	0.554	156.2	0.386	156.2	0.232
783	156.4	0.554	156.4	0.386	156.4	0.232
784	156.6	0.554	156.6	0.385	156.6	0.232
785	156.8	0.554	156.8	0.385	156.8	0.232
786	157	0.554	157	0.385	157	0.232
787	157.2	0.554	157.2	0.385	157.2	0.232
788	157.4	0.553	157.4	0.385	157.4	0.232
789	157.6	0.553	157.6	0.385	157.6	0.232
790	157.8	0.553	157.8	0.385	157.8	0.233
791	158	0.553	158	0.385	158	0.233
792	158.2	0.553	158.2	0.385	158.2	0.233
793	158.4	0.554	158.4	0.385	158.4	0.233
794	158.6	0.554	158.6	0.385	158.6	0.234
795	158.8	0.555	158.8	0.386	158.8	0.234
796	159	0.555	159	0.386	159	0.235
797	159.2	0.556	159.2	0.386	159.2	0.235
798	159.4	0.557	159.4	0.387	159.4	0.235
799	159.6	0.558	159.6	0.387	159.6	0.235
800	159.8	0.558	159.8	0.387	159.8	0.235
801	160	0.558	160	0.388	160	0.235
802	160.2	0.559	160.2	0.388	160.2	0.234
803	160.4	0.559	160.4	0.388	160.4	0.234
804	160.6	0.559	160.6	0.389	160.6	0.234
805	160.8	0.559	160.8	0.389	160.8	0.234
806	161	0.559	161	0.39	161	0.234
807	161.2	0.559	161.2	0.39	161.2	0.234
808	161.4	0.559	161.4	0.39	161.4	0.234
809	161.6	0.559	161.6	0.39	161.6	0.234
810	161.8	0.559	161.8	0.39	161.8	0.234
811	162	0.559	162	0.39	162	0.234
812	162.2	0.559	162.2	0.39	162.2	0.235
813	162.4	0.559	162.4	0.39	162.4	0.235
814	162.6	0.559	162.6	0.389	162.6	0.236
815	162.8	0.559	162.8	0.389	162.8	0.236
816	163	0.56	163	0.389	163	0.236
817	163.2	0.56	163.2	0.388	163.2	0.236
818	163.4	0.56	163.4	0.388	163.4	0.237
819	163.6	0.56	163.6	0.388	163.6	0.237
820	163.8	0.56	163.8	0.388	163.8	0.237
821	164	0.56	164	0.388	164	0.237
822	164.2	0.561	164.2	0.387	164.2	0.237
823	164.4	0.561	164.4	0.387	164.4	0.237
824	164.6	0.562	164.6	0.388	164.6	0.237
825	164.8	0.562	164.8	0.388	164.8	0.237
826	165	0.563	165	0.388	165	0.237
827	165.2	0.563	165.2	0.389	165.2	0.237
828	165.4	0.564	165.4	0.389	165.4	0.236
829	165.6	0.564	165.6	0.389	165.6	0.236
830	165.8	0.564	165.8	0.389	165.8	0.235
831	166	0.565	166	0.389	166	0.235
832	166.2	0.565	166.2	0.389	166.2	0.235
833	166.4	0.566	166.4	0.39	166.4	0.235
834	166.6	0.566	166.6	0.39	166.6	0.235
835	166.8	0.566	166.8	0.39	166.8	0.235
836	167	0.567	167	0.39	167	0.236
837	167.2	0.567	167.2	0.39	167.2	0.236
838	167.4	0.567	167.4	0.39	167.4	0.236
839	167.6	0.567	167.6	0.39	167.6	0.237
840	167.8	0.567	167.8	0.39	167.8	0.237
841	168	0.568	168	0.39	168	0.237
842	168.2	0.568	168.2	0.39	168.2	0.238
843	168.4	0.569	168.4	0.39	168.4	0.238
844	168.6	0.569	168.6	0.391	168.6	0.238
845	168.8	0.569	168.8	0.391	168.8	0.238
846	169	0.569	169	0.391	169	0.238
847	169.2	0.57	169.2	0.391	169.2	0.237
848	169.4	0.57	169.4	0.391	169.4	0.237
849	169.6	0.57	169.6	0.392	169.6	0.237
850	169.8	0.57	169.8	0.392	169.8	0.237
851	170	0.57	170	0.392	170	0.237
852	170.2	0.57	170.2	0.392	170.2	0.237
853	170.4	0.571	170.4	0.392	170.4	0.237
854	170.6	0.572	170.6	0.392	170.6	0.237
855	170.8	0.572	170.8	0.392	170.8	0.237
856	171	0.573	171	0.392	171	0.237
857	171.2	0.573	171.2	0.391	171.2	0.237
858	171.4	0.573	171.4	0.391	171.4	0.237
859	171.6	0.574	171.6	0.391	171.6	0.237
860	171.8	0.574	171.8	0.391	171.8	0.237
861	172	0.574	172	0.391	172	0.238
862	172.2	0.574	172.2	0.391	172.2	0.238
863	172.4	0.575	172.4	0.392	172.4	0.238
864	172.6	0.575	172.6	0.392	172.6	0.238
865	172.8	0.575	172.8	0.392	172.8	0.238
866	173	0.576	173	0.392	173	0.239
867	173.2	0.576	173.2	0.393	173.2	0.239
868	173.4	0.576	173.4	0.393	173.4	0.239
869	173.6	0.576	173.6	0.393	173.6	0.238
870	173.8	0.576	173.8	0.393	173.8	0.238
871	174	0.576	174	0.394	174	0.238
872	174.2	0.576	174.2	0.394	174.2	0.238
873	174.4	0.576	174.4	0.395	174.4	0.238
874	174.6	0.576	174.6	0.395	174.6	0.238
875	174.8	0.576	174.8	0.395	174.8	0.238
876	175	0.576	175	0.395	175	0.238
877	175.2	0.576	175.2	0.395	175.2	0.238
878	175.4	0.576	175.4	0.395	175.4	0.239
879	175.6	0.576	175.6	0.395	175.6	0.239
880	175.8	0.577	175.8	0.395	175.8	0.239
881	176	0.577	176	0.395	176	0.24
882	176.2	0.578	176.2	0.394	176.2	0.24
883	176.4	0.579	176.4	0.394	176.4	0.24
884	176.6	0.58	176.6	0.395	176.6	0.24
885	176.8	0.581	176.8	0.395	176.8	0.24
886	177	0.581	177	0.395	177	0.24
887	177.2	0.582	177.2	0.396	177.2	0.24
888	177.4	0.582	177.4	0.396	177.4	0.24
889	177.6	0.582	177.6	0.396	177.6	0.24
890	177.8	0.582	177.8	0.396	177.8	0.24
891	178	0.582	178	0.396	178	0.24
892	178.2	0.582	178.2	0.397	178.2	0.24
893	178.4	0.582	178.4	0.397	178.4	0.24
894	178.6	0.582	178.6	0.396	178.6	0.24
895	178.8	0.582	178.8	0.396	178.8	0.241
896	179	0.583	179	0.396	179	0.241
897	179.2	0.583	179.2	0.395	179.2	0.242
898	179.4	0.583	179.4	0.395	179.4	0.242
899	179.6	0.584	179.6	0.395	179.6	0.243
900	179.8	0.584	179.8	0.394	179.8	0.243
901	180	0.584	180	0.394	180	0.243
902	180.2	0.585	180.2	0.394	180.2	0.243
903	180.4	0.585	180.4	0.394	180.4	0.243
904	180.6	0.585	180.6	0.394	180.6	0.243
905	180.8	0.585	180.8	0.394	180.8	0.243
906	181	0.585	181	0.394	181	0.243
907	181.2	0.585	181.2	0.395	181.2	0.243
908	181.4	0.585	181.4	0.395	181.4	0.243
909	181.6	0.585	181.6	0.395	181.6	0.243
910	181.8	0.586	181.8	0.395	181.8	0.243
911	182	0.586	182	0.395	182	0.243
912	182.2	0.586	182.2	0.395	182.2	0.243
913	182.4	0.586	182.4	0.396	182.4	0.243
914	182.6	0.587	182.6	0.396	182.6	0.243
915	182.8	0.587	182.8	0.397	182.8	0.243
916	183	0.587	183	0.397	183	0.243
917	183.2	0.588	183.2	0.397	183.2	0.243
918	183.4	0.588	183.4	0.398	183.4	0.243
919	183.6	0.588	183.6	0.398	183.6	0.243
920	183.8	0.588	183.8	0.398	183.8	0.243
921	184	0.589	184	0.397	184	0.243
922	184.2	0.589	184.2	0.397	184.2	0.243
923	184.4	0.589	184.4	0.397	184.4	0.242
924	184.6	0.59	184.6	0.397	184.6	0.242
925	184.8	0.59	184.8	0.397	184.8	0.243
926	185	0.591	185	0.396	185	0.243
927	185.2	0.591	185.2	0.396	185.2	0.243
928	185.4	0.592	185.4	0.396	185.4	0.243
929	185.6	0.593	185.6	0.395	185.6	0.244
930	185.8	0.593	185.8	0.395	185.8	0.244
931	186	0.593	186	0.395	186	0.244
932	186.2	0.594	186.2	0.396	186.2	0.244
933	186.4	0.594	186.4	0.396	186.4	0.244
934	186.6	0.594	186.6	0.397	186.6	0.244
935	186.8	0.594	186.8	0.397	186.8	0.244
936	187	0.594	187	0.398	187	0.244
937	187.2	0.594	187.2	0.398	187.2	0.244
938	187.4	0.594	187.4	0.398	187.4	0.244
939	187.6	0.594	187.6	0.398	187.6	0.244
940	187.8	0.593	187.8	0.398	187.8	0.243
941	188	0.593	188	0.398	188	0.243
942	188.2	0.593	188.2	0.398	188.2	0.243
943	188.4	0.593	188.4	0.398	188.4	0.243
944	188.6	0.594	188.6	0.398	188.6	0.243
945	188.8	0.594	188.8	0.398	188.8	0.244
946	189	0.594	189	0.398	189	0.244
947	189.2	0.594	189.2	0.398	189.2	0.244
948	189.4	0.595	189.4	0.398	189.4	0.244
949	189.6	0.595	189.6	0.398	189.6	0.244
950	189.8	0.595	189.8	0.399	189.8	0.244
951	190	0.596	190	0.399	190	0.244
952	190.2	0.596	190.2	0.399	190.2	0.244
953	190.4	0.596	190.4	0.399	190.4	0.244
954	190.6	0.597	190.6	0.398	190.6	0.244
955	190.8	0.598	190.8	0.398	190.8	0.244
956	191	0.598	191	0.398	191	0.244
957	191.2	0.599	191.2	0.398	191.2	0.244
958	191.4	0.599	191.4	0.398	191.4	0.245
959	191.6	0.6	191.6	0.398	191.6	0.245
960	191.8	0.6	191.8	0.398	191.8	0.245
961	192	0.601	192	0.398	192	0.246
962	192.2	0.601	192.2	0.399	192.2	0.246
963	192.4	0.601	192.4	0.399	192.4	0.246
964	192.6	0.6	192.6	0.399	192.6	0.246
965	192.8	0.6	192.8	0.399	192.8	0.247
966	193	0.6	193	0.399	193	0.247
967	193.2	0.6	193.2	0.399	193.2	0.247
968	193.4	0.6	193.4	0.399	193.4	0.247
969	193.6	0.6	193.6	0.399	193.6	0.247
970	193.8	0.6	193.8	0.399	193.8	0.247
971	194	0.6	194	0.399	194	0.247
972	194.2	0.6	194.2	0.4	194.2	0.247
973	194.4	0.6	194.4	0.4	194.4	0.247
974	194.6	0.6	194.6	0.4	194.6	0.247
975	194.8	0.6	194.8	0.4	194.8	0.247
976	195	0.601	195	0.401	195	0.247
977	195.2	0.601	195.2	0.401	195.2	0.247
978	195.4	0.602	195.4	0.401	195.4	0.247
979	195.6	0.602	195.6	0.402	195.6	0.247
980	195.8	0.602	195.8	0.402	195.8	0.247
981	196	0.603	196	0.402	196	0.247
982	196.2	0.603	196.2	0.402	196.2	0.247
983	196.4	0.604	196.4	0.402	196.4	0.247
984	196.6	0.604	196.6	0.402	196.6	0.248
985	196.8	0.605	196.8	0.402	196.8	0.248
986	197	0.605	197	0.402	197	0.248
987	197.2	0.605	197.2	0.401	197.2	0.249
988	197.4	0.605	197.4	0.401	197.4	0.249
989	197.6	0.605	197.6	0.401	197.6	0.249
990	197.8	0.605	197.8	0.401	197.8	0.249
991	198	0.605	198	0.401	198	0.249
992	198.2	0.605	198.2	0.401	198.2	0.249
993	198.4	0.605	198.4	0.402	198.4	0.249
994	198.6	0.605	198.6	0.402	198.6	0.249
995	198.8	0.605	198.8	0.402	198.8	0.248
996	199	0.605	199	0.402	199	0.248
997	199.2	0.605	199.2	0.402	199.2	0.248
998	199.4	0.605	199.4	0.402	199.4	0.248
999	199.6	0.605	199.6	0.402	199.6	0.248
1000	199.8	0.605	199.8	0.403	199.8	0.249
1001	200	0.605	200	0.403	200	0.249
1002	200.2	0.606	200.2	0.403	200.2	0.249
1003	200.4	0.606	200.4	0.403	200.4	0.25
1004	200.6	0.606	200.6	0.403	200.6	0.25
1005	200.8	0.607	200.8	0.403	200.8	0.251
1006	201	0.608	201	0.402	201	0.251
1007	201.2	0.608	201.2	0.402	201.2	0.251
1008	201.4	0.609	201.4	0.402	201.4	0.251
1009	201.6	0.61	201.6	0.402	201.6	0.251
1010	201.8	0.61	201.8	0.402	201.8	0.251
1011	202	0.61	202	0.402	202	0.251
1012	202.2	0.61	202.2	0.402	202.2	0.25
1013	202.4	0.61	202.4	0.402	202.4	0.25
1014	202.6	0.61	202.6	0.402	202.6	0.249
1015	202.8	0.61	202.8	0.402	202.8	0.249
1016	203	0.61	203	0.402	203	0.249
1017	203.2	0.61	203.2	0.402	203.2	0.249
1018	203.4	0.61	203.4	0.402	203.4	0.249
1019	203.6	0.61	203.6	0.403	203.6	0.249
1020	203.8	0.61	203.8	0.403	203.8	0.249
1021	204	0.61	204	0.403	204	0.249
1022	204.2	0.61	204.2	0.404	204.2	0.249
1023	204.4	0.611	204.4	0.404	204.4	0.25
1024	204.6	0.611	204.6	0.404	204.6	0.25
1025	204.8	0.611	204.8	0.404	204.8	0.25
1026	205	0.612	205	0.404	205	0.25
1027	205.2	0.612	205.2	0.404	205.2	0.25
1028	205.4	0.612	205.4	0.404	205.4	0.25
1029	205.6	0.612	205.6	0.404	205.6	0.25
1030	205.8	0.612	205.8	0.404	205.8	0.25
1031	206	0.612	206	0.403	206	0.249
1032	206.2	0.613	206.2	0.403	206.2	0.249
1033	206.4	0.613	206.4	0.402	206.4	0.249
1034	206.6	0.613	206.6	0.402	206.6	0.249
1035	206.8	0.613	206.8	0.401	206.8	0.249
1036	207	0.613	207	0.401	207	0.25
1037	207.2	0.614	207.2	0.401	207.2	0.25
1038	207.4	0.614	207.4	0.401	207.4	0.25
1039	207.6	0.615	207.6	0.402	207.6	0.25
1040	207.8	0.616	207.8	0.402	207.8	0.25
1041	208	0.617	208	0.403	208	0.25
1042	208.2	0.617	208.2	0.403	208.2	0.25
1043	208.4	0.618	208.4	0.404	208.4	0.251
1044	208.6	0.618	208.6	0.404	208.6	0.251
1045	208.8	0.619	208.8	0.404	208.8	0.251
1046	209	0.619	209	0.404	209	0.251
1047	209.2	0.62	209.2	0.404	209.2	0.251
1048	209.4	0.62	209.4	0.404	209.4	0.251
1049	209.6	0.62	209.6	0.404	209.6	0.251
1050	209.8	0.621	209.8	0.404	209.8	0.251
1051	210	0.621	210	0.404	210	0.251
1052	210.2	0.621	210.2	0.404	210.2	0.251
1053	210.4	0.62	210.4	0.404	210.4	0.251
1054	210.6	0.62	210.6	0.404	210.6	0.251
1055	210.8	0.62	210.8	0.404	210.8	0.251
1056	211	0.62	211	0.404	211	0.251
1057	211.2	0.619	211.2	0.404	211.2	0.251
1058	211.4	0.619	211.4	0.404	211.4	0.251
1059	211.6	0.619	211.6	0.405	211.6	0.251
1060	211.8	0.618	211.8	0.405	211.8	0.252
1061	212	0.618	212	0.405	212	0.252
1062	212.2	0.618	212.2	0.405	212.2	0.253
1063	212.4	0.618	212.4	0.405	212.4	0.253
1064	212.6	0.618	212.6	0.405	212.6	0.254
1065	212.8	0.618	212.8	0.405	212.8	0.254
1066	213	0.618	213	0.405	213	0.254
1067	213.2	0.619	213.2	0.405	213.2	0.254
1068	213.4	0.619	213.4	0.405	213.4	0.254
1069	213.6	0.619	213.6	0.405	213.6	0.254
1070	213.8	0.62	213.8	0.405	213.8	0.253
1071	214	0.62	214	0.405	214	0.253
1072	214.2	0.62	214.2	0.405	214.2	0.253
1073	214.4	0.621	214.4	0.405	214.4	0.253
1074	214.6	0.621	214.6	0.404	214.6	0.252
1075	214.8	0.622	214.8	0.404	214.8	0.252
1076	215	0.622	215	0.404	215	0.252
1077	215.2	0.622	215.2	0.404	215.2	0.252
1078	215.4	0.623	215.4	0.404	215.4	0.252
1079	215.6	0.623	215.6	0.404	215.6	0.252
1080	215.8	0.623	215.8	0.404	215.8	0.252
1081	216	0.623	216	0.405	216	0.253
1082	216.2	0.623	216.2	0.405	216.2	0.253
1083	216.4	0.623	216.4	0.405	216.4	0.253
1084	216.6	0.623	216.6	0.405	216.6	0.253
1085	216.8	0.623	216.8	0.406	216.8	0.253
1086	217	0.624	217	0.406	217	0.253
1087	217.2	0.624	217.2	0.407	217.2	0.253
1088	217.4	0.624	217.4	0.407	217.4	0.253
1089	217.6	0.624	217.6	0.407	217.6	0.253
1090	217.8	0.624	217.8	0.408	217.8	0.253
1091	218	0.624	218	0.408	218	0.253
1092	218.2	0.625	218.2	0.408	218.2	0.254
1093	218.4	0.625	218.4	0.409	218.4	0.254
1094	218.6	0.626	218.6	0.409	218.6	0.254
1095	218.8	0.626	218.8	0.409	218.8	0.254
1096	219	0.626	219	0.41	219	0.254
1097	219.2	0.626	219.2	0.41	219.2	0.254
1098	219.4	0.627	219.4	0.41	219.4	0.254
1099	219.6	0.627	219.6	0.409	219.6	0.254
1100	219.8	0.627	219.8	0.409	219.8	0.254
1101	220	0.627	220	0.409	220	0.254
1102	220.2	0.627	220.2	0.408	220.2	0.254
1103	220.4	0.627	220.4	0.408	220.4	0.254
1104	220.6	0.627	220.6	0.407	220.6	0.254
1105	220.8	0.627	220.8	0.407	220.8	0.254
1106	221	0.626	221	0.407	221	0.254
1107	221.2	0.626	221.2	0.408	221.2	0.254
1108	221.4	0.626	221.4	0.408	221.4	0.254
1109	221.6	0.626	221.6	0.408	221.6	0.254
1110	221.8	0.626	221.8	0.408	221.8	0.254
1111	222	0.626	222	0.408	222	0.254
1112	222.2	0.626	222.2	0.408	222.2	0.254
1113	222.4	0.627	222.4	0.408	222.4	0.254
1114	222.6	0.627	222.6	0.408	222.6	0.254
1115	222.8	0.628	222.8	0.409	222.8	0.254
1116	223	0.628	223	0.409	223	0.254
1117	223.2	0.629	223.2	0.409	223.2	0.254
1118	223.4	0.629	223.4	0.41	223.4	0.254
1119	223.6	0.63	223.6	0.41	223.6	0.253
1120	223.8	0.631	223.8	0.41	223.8	0.253
1121	224	0.632	224	0.41	224	0.253
1122	224.2	0.632	224.2	0.41	224.2	0.253
1123	224.4	0.632	224.4	0.409	224.4	0.253
1124	224.6	0.632	224.6	0.409	224.6	0.254
1125	224.8	0.632	224.8	0.409	224.8	0.254
1126	225	0.633	225	0.41	225	0.254
1127	225.2	0.633	225.2	0.41	225.2	0.255
1128	225.4	0.633	225.4	0.41	225.4	0.255
1129	225.6	0.634	225.6	0.41	225.6	0.256
1130	225.8	0.634	225.8	0.41	225.8	0.256
1131	226	0.634	226	0.41	226	0.256
1132	226.2	0.635	226.2	0.409	226.2	0.256
1133	226.4	0.635	226.4	0.409	226.4	0.256
1134	226.6	0.635	226.6	0.409	226.6	0.257
1135	226.8	0.635	226.8	0.409	226.8	0.257
1136	227	0.635	227	0.41	227	0.257
1137	227.2	0.634	227.2	0.41	227.2	0.257
1138	227.4	0.634	227.4	0.41	227.4	0.257
1139	227.6	0.634	227.6	0.411	227.6	0.257
1140	227.8	0.633	227.8	0.411	227.8	0.257
1141	228	0.633	228	0.41	228	0.257
1142	228.2	0.632	228.2	0.41	228.2	0.257
1143	228.4	0.632	228.4	0.41	228.4	0.257
1144	228.6	0.632	228.6	0.41	228.6	0.257
1145	228.8	0.632	228.8	0.41	228.8	0.258
1146	229	0.633	229	0.41	229	0.258
1147	229.2	0.633	229.2	0.41	229.2	0.258
1148	229.4	0.634	229.4	0.41	229.4	0.258
1149	229.6	0.635	229.6	0.41	229.6	0.258
1150	229.8	0.636	229.8	0.409	229.8	0.258
1151	230	0.636	230	0.409	230	0.258
1152	230.2	0.637	230.2	0.409	230.2	0.258
1153	230.4	0.638	230.4	0.409	230.4	0.258
1154	230.6	0.639	230.6	0.409	230.6	0.258
1155	230.8	0.639	230.8	0.41	230.8	0.258
1156	231	0.639	231	0.41	231	0.258
1157	231.2	0.639	231.2	0.41	231.2	0.258
1158	231.4	0.638	231.4	0.41	231.4	0.258
1159	231.6	0.638	231.6	0.41	231.6	0.258
1160	231.8	0.638	231.8	0.41	231.8	0.258
1161	232	0.638	232	0.411	232	0.258
1162	232.2	0.638	232.2	0.411	232.2	0.258
1163	232.4	0.638	232.4	0.411	232.4	0.258
1164	232.6	0.638	232.6	0.411	232.6	0.258
1165	232.8	0.638	232.8	0.411	232.8	0.258
1166	233	0.639	233	0.411	233	0.258
1167	233.2	0.639	233.2	0.411	233.2	0.259
1168	233.4	0.639	233.4	0.411	233.4	0.259
1169	233.6	0.64	233.6	0.411	233.6	0.259
1170	233.8	0.64	233.8	0.41	233.8	0.259
1171	234	0.641	234	0.41	234	0.259
1172	234.2	0.641	234.2	0.41	234.2	0.259
1173	234.4	0.641	234.4	0.41	234.4	0.259
1174	234.6	0.641	234.6	0.409	234.6	0.259
1175	234.8	0.64	234.8	0.409	234.8	0.259
1176	235	0.64	235	0.409	235	0.259
1177	235.2	0.64	235.2	0.408	235.2	0.259
1178	235.4	0.64	235.4	0.408	235.4	0.259
1179	235.6	0.64	235.6	0.408	235.6	0.259
1180	235.8	0.64	235.8	0.408	235.8	0.259
1181	236	0.641	236	0.409	236	0.259
1182	236.2	0.641	236.2	0.409	236.2	0.259
1183	236.4	0.642	236.4	0.409	236.4	0.259
1184	236.6	0.643	236.6	0.41	236.6	0.259
1185	236.8	0.643	236.8	0.41	236.8	0.259
1186	237	0.644	237	0.41	237	0.259
1187	237.2	0.645	237.2	0.411	237.2	0.259
1188	237.4	0.646	237.4	0.411	237.4	0.258
1189	237.6	0.646	237.6	0.412	237.6	0.258
1190	237.8	0.647	237.8	0.412	237.8	0.258
1191	238	0.647	238	0.413	238	0.258
1192	238.2	0.647	238.2	0.413	238.2	0.258
1193	238.4	0.647	238.4	0.413	238.4	0.258
1194	238.6	0.647	238.6	0.413	238.6	0.258
1195	238.8	0.646	238.8	0.413	238.8	0.258
1196	239	0.646	239	0.413	239	0.259
1197	239.2	0.645	239.2	0.413	239.2	0.259
1198	239.4	0.644	239.4	0.412	239.4	0.259
1199	239.6	0.644	239.6	0.412	239.6	0.259
1200	239.8	0.644	239.8	0.412	239.8	0.26
1201	240	0.644	240	0.413	240	0.26
1202	240.2	0.645	240.2	0.413	240.2	0.26
1203	240.4	0.645	240.4	0.412	240.4	0.26
1204	240.6	0.645	240.6	0.412	240.6	0.26
1205	240.8	0.645	240.8	0.412	240.8	0.26
1206	241	0.645	241	0.412	241	0.26
1207	241.2	0.645	241.2	0.412	241.2	0.26
1208	241.4	0.645	241.4	0.413	241.4	0.26
1209	241.6	0.646	241.6	0.413	241.6	0.26
1210	241.8	0.646	241.8	0.413	241.8	0.26
1211	242	0.647	242	0.413	242	0.26
1212	242.2	0.647	242.2	0.413	242.2	0.26
1213	242.4	0.648	242.4	0.414	242.4	0.26
1214	242.6	0.648	242.6	0.414	242.6	0.26
1215	242.8	0.648	242.8	0.414	242.8	0.26
1216	243	0.648	243	0.414	243	0.261
1217	243.2	0.648	243.2	0.414	243.2	0.261
1218	243.4	0.648	243.4	0.414	243.4	0.261
1219	243.6	0.648	243.6	0.414	243.6	0.261
1220	243.8	0.648	243.8	0.415	243.8	0.261
1221	244	0.648	244	0.415	244	0.26
1222	244.2	0.648	244.2	0.415	244.2	0.261
1223	244.4	0.648	244.4	0.415	244.4	0.261
1224	244.6	0.647	244.6	0.415	244.6	0.261
1225	244.8	0.646	244.8	0.415	244.8	0.261
1226	245	0.646	245	0.415	245	0.261
1227	245.2	0.646	245.2	0.415	245.2	0.261
1228	245.4	0.646	245.4	0.415	245.4	0.262
1229	245.6	0.646	245.6	0.415	245.6	0.262
1230	245.8	0.647	245.8	0.415	245.8	0.262
1231	246	0.647	246	0.415	246	0.262
1232	246.2	0.648	246.2	0.415	246.2	0.262
1233	246.4	0.648	246.4	0.414	246.4	0.262
1234	246.6	0.649	246.6	0.414	246.6	0.262
1235	246.8	0.649	246.8	0.414	246.8	0.263
1236	247	0.65	247	0.413	247	0.263
1237	247.2	0.65	247.2	0.413	247.2	0.263
1238	247.4	0.65	247.4	0.413	247.4	0.263
1239	247.6	0.651	247.6	0.413	247.6	0.263
1240	247.8	0.651	247.8	0.413	247.8	0.262
1241	248	0.652	248	0.413	248	0.262
1242	248.2	0.652	248.2	0.413	248.2	0.262
1243	248.4	0.653	248.4	0.413	248.4	0.261
1244	248.6	0.653	248.6	0.414	248.6	0.261
1245	248.8	0.654	248.8	0.414	248.8	0.261
1246	249	0.654	249	0.414	249	0.261
1247	249.2	0.654	249.2	0.414	249.2	0.261
1248	249.4	0.654	249.4	0.414	249.4	0.261
1249	249.6	0.653	249.6	0.415	249.6	0.262
1250	249.8	0.653	249.8	0.415	249.8	0.262
1251	250	0.652	250	0.415	250	0.262
1252	250.2	0.651	250.2	0.415	250.2	0.263
1253	250.4	0.65	250.4	0.415	250.4	0.263
1254	250.6	0.65	250.6	0.415	250.6	0.263
1255	250.8	0.65	250.8	0.415	250.8	0.263
1256	251	0.65	251	0.414	251	0.263
1257	251.2	0.65	251.2	0.414	251.2	0.263
1258	251.4	0.651	251.4	0.415	251.4	0.263
1259	251.6	0.652	251.6	0.415	251.6	0.263
1260	251.8	0.653	251.8	0.415	251.8	0.263
1261	252	0.654	252	0.416	252	0.263
1262	252.2	0.655	252.2	0.416	252.2	0.262
1263	252.4	0.656	252.4	0.416	252.4	0.262
1264	252.6	0.657	252.6	0.416	252.6	0.262
1265	252.8	0.658	252.8	0.417	252.8	0.262
1266	253	0.659	253	0.417	253	0.262
1267	253.2	0.659	253.2	0.417	253.2	0.262
1268	253.4	0.659	253.4	0.417	253.4	0.263
1269	253.6	0.659	253.6	0.417	253.6	0.263
1270	253.8	0.659	253.8	0.417	253.8	0.263
1271	254	0.658	254	0.417	254	0.263
1272	254.2	0.658	254.2	0.417	254.2	0.264
1273	254.4	0.657	254.4	0.417	254.4	0.264
1274	254.6	0.656	254.6	0.417	254.6	0.264
1275	254.8	0.656	254.8	0.417	254.8	0.264
1276	255	0.655	255	0.416	255	0.265
1277	255.2	0.654	255.2	0.416	255.2	0.265
1278	255.4	0.654	255.4	0.416	255.4	0.265
1279	255.6	0.653	255.6	0.416	255.6	0.266
1280	255.8	0.653	255.8	0.416	255.8	0.266
1281	256	0.653	256	0.416	256	0.266
1282	256.2	0.653	256.2	0.416	256.2	0.267
1283	256.4	0.654	256.4	0.416	256.4	0.267
1284	256.6	0.654	256.6	0.416	256.6	0.267
1285	256.8	0.655	256.8	0.416	256.8	0.267
1286	257	0.656	257	0.416	257	0.266
1287	257.2	0.656	257.2	0.416	257.2	0.266
1288	257.4	0.657	257.4	0.416	257.4	0.265
1289	257.6	0.657	257.6	0.417	257.6	0.265
1290	257.8	0.658	257.8	0.417	257.8	0.265
1291	258	0.658	258	0.418	258	0.264
1292	258.2	0.658	258.2	0.418	258.2	0.264
1293	258.4	0.659	258.4	0.418	258.4	0.264
1294	258.6	0.659	258.6	0.418	258.6	0.264
1295	258.8	0.659	258.8	0.418	258.8	0.264
1296	259	0.66	259	0.418	259	0.264
1297	259.2	0.66	259.2	0.418	259.2	0.265
1298	259.4	0.66	259.4	0.418	259.4	0.265
1299	259.6	0.661	259.6	0.418	259.6	0.265
1300	259.8	0.661	259.8	0.418	259.8	0.266
1301	260	0.662	260	0.418	260	0.267
1302	260.2	0.663	260.2	0.418	260.2	0.267
1303	260.4	0.663	260.4	0.417	260.4	0.268
1304	260.6	0.664	260.6	0.417	260.6	0.269
1305	260.8	0.664	260.8	0.417	260.8	0.269
1306	261	0.663	261	0.417	261	0.269
1307	261.2	0.663	261.2	0.416	261.2	0.269
1308	261.4	0.662	261.4	0.417	261.4	0.269
1309	261.6	0.661	261.6	0.417	261.6	0.268
1310	261.8	0.66	261.8	0.417	261.8	0.268
1311	262	0.659	262	0.417	262	0.268
1312	262.2	0.659	262.2	0.417	262.2	0.268
1313	262.4	0.659	262.4	0.416	262.4	0.268
1314	262.6	0.659	262.6	0.416	262.6	0.268
1315	262.8	0.659	262.8	0.416	262.8	0.267
1316	263	0.659	263	0.416	263	0.267
1317	263.2	0.659	263.2	0.416	263.2	0.266
1318	263.4	0.659	263.4	0.416	263.4	0.266
1319	263.6	0.659	263.6	0.416	263.6	0.266
1320	263.8	0.659	263.8	0.416	263.8	0.266
1321	264	0.66	264	0.416	264	0.265
1322	264.2	0.66	264.2	0.416	264.2	0.265
1323	264.4	0.66	264.4	0.416	264.4	0.265
1324	264.6	0.661	264.6	0.416	264.6	0.266
1325	264.8	0.661	264.8	0.416	264.8	0.266
1326	265	0.662	265	0.417	265	0.266
1327	265.2	0.662	265.2	0.417	265.2	0.266
1328	265.4	0.662	265.4	0.417	265.4	0.266
1329	265.6	0.662	265.6	0.418	265.6	0.267
1330	265.8	0.663	265.8	0.418	265.8	0.267
1331	266	0.663	266	0.418	266	0.268
1332	266.2	0.663	266.2	0.418	266.2	0.268
1333	266.4	0.664	266.4	0.418	266.4	0.268
1334	266.6	0.664	266.6	0.418	266.6	0.268
1335	266.8	0.665	266.8	0.418	266.8	0.268
1336	267	0.665	267	0.418	267	0.268
1337	267.2	0.665	267.2	0.418	267.2	0.268
1338	267.4	0.666	267.4	0.418	267.4	0.268
1339	267.6	0.666	267.6	0.419	267.6	0.268
1340	267.8	0.666	267.8	0.419	267.8	0.267
1341	268	0.666	268	0.419	268	0.267
1342	268.2	0.666	268.2	0.419	268.2	0.267
1343	268.4	0.667	268.4	0.419	268.4	0.267
1344	268.6	0.667	268.6	0.419	268.6	0.267
1345	268.8	0.667	268.8	0.419	268.8	0.268
1346	269	0.668	269	0.419	269	0.268
1347	269.2	0.668	269.2	0.419	269.2	0.268
1348	269.4	0.667	269.4	0.419	269.4	0.269
1349	269.6	0.667	269.6	0.419	269.6	0.269
1350	269.8	0.667	269.8	0.419	269.8	0.27
1351	270	0.666	270	0.419	270	0.27
1352	270.2	0.666	270.2	0.419	270.2	0.27
1353	270.4	0.666	270.4	0.419	270.4	0.271
1354	270.6	0.666	270.6	0.419	270.6	0.271
1355	270.8	0.666	270.8	0.419	270.8	0.271
1356	271	0.666	271	0.419	271	0.271
1357	271.2	0.666	271.2	0.419	271.2	0.271
1358	271.4	0.666	271.4	0.419	271.4	0.271
1359	271.6	0.666	271.6	0.419	271.6	0.271
1360	271.8	0.667	271.8	0.42	271.8	0.271
1361	272	0.667	272	0.42	272	0.271
1362	272.2	0.668	272.2	0.421	272.2	0.271
1363	272.4	0.669	272.4	0.421	272.4	0.271
1364	272.6	0.67	272.6	0.421	272.6	0.271
1365	272.8	0.671	272.8	0.421	272.8	0.271
1366	273	0.673	273	0.421	273	0.271
1367	273.2	0.673	273.2	0.42	273.2	0.271
1368	273.4	0.674	273.4	0.42	273.4	0.271
1369	273.6	0.674	273.6	0.42	273.6	0.271
1370	273.8	0.674	273.8	0.421	273.8	0.271
1371	274	0.674	274	0.421	274	0.271
1372	274.2	0.674	274.2	0.421	274.2	0.27
1373	274.4	0.674	274.4	0.421	274.4	0.27
1374	274.6	0.674	274.6	0.42	274.6	0.27
1375	274.8	0.674	274.8	0.42	274.8	0.27
1376	275	0.675	275	0.42	275	0.27
1377	275.2	0.675	275.2	0.42	275.2	0.27
1378	275.4	0.675	275.4	0.42	275.4	0.271
1379	275.6	0.676	275.6	0.42	275.6	0.271
1380	275.8	0.676	275.8	0.42	275.8	0.272
1381	276	0.677	276	0.42	276	0.272
1382	276.2	0.677	276.2	0.42	276.2	0.272
1383	276.4	0.678	276.4	0.419	276.4	0.272
1384	276.6	0.678	276.6	0.419	276.6	0.272
1385	276.8	0.678	276.8	0.419	276.8	0.272
1386	277	0.677	277	0.419	277	0.272
1387	277.2	0.677	277.2	0.419	277.2	0.272
1388	277.4	0.677	277.4	0.419	277.4	0.272
1389	277.6	0.677	277.6	0.42	277.6	0.272
1390	277.8	0.676	277.8	0.421	277.8	0.272
1391	278	0.676	278	0.421	278	0.272
1392	278.2	0.676	278.2	0.422	278.2	0.272
1393	278.4	0.676	278.4	0.422	278.4	0.272
1394	278.6	0.676	278.6	0.422	278.6	0.272
1395	278.8	0.676	278.8	0.422	278.8	0.272
1396	279	0.676	279	0.422	279	0.272
1397	279.2	0.676	279.2	0.422	279.2	0.272
1398	279.4	0.676	279.4	0.422	279.4	0.273
1399	279.6	0.676	279.6	0.422	279.6	0.272
1400	279.8	0.676	279.8	0.422	279.8	0.272
1401	280	0.676	280	0.422	280	0.272
1402	280.2	0.675	280.2	0.422	280.2	0.271
1403	280.4	0.675	280.4	0.422	280.4	0.271
1404	280.6	0.675	280.6	0.422	280.6	0.27
1405	280.8	0.675	280.8	0.422	280.8	0.27
1406	281	0.675	281	0.422	281	0.27
1407	281.2	0.674	281.2	0.422	281.2	0.27
1408	281.4	0.674	281.4	0.422	281.4	0.27
1409	281.6	0.675	281.6	0.422	281.6	0.27
1410	281.8	0.675	281.8	0.422	281.8	0.271
1411	282	0.675	282	0.422	282	0.271
1412	282.2	0.676	282.2	0.422	282.2	0.272
1413	282.4	0.676	282.4	0.421	282.4	0.273
1414	282.6	0.677	282.6	0.421	282.6	0.273
1415	282.8	0.677	282.8	0.421	282.8	0.273
1416	283	0.677	283	0.421	283	0.273
1417	283.2	0.678	283.2	0.421	283.2	0.274
1418	283.4	0.679	283.4	0.421	283.4	0.274
1419	283.6	0.679	283.6	0.421	283.6	0.274
1420	283.8	0.68	283.8	0.421	283.8	0.274
1421	284	0.681	284	0.422	284	0.274
1422	284.2	0.681	284.2	0.422	284.2	0.274
1423	284.4	0.682	284.4	0.422	284.4	0.273
1424	284.6	0.682	284.6	0.422	284.6	0.273
1425	284.8	0.681	284.8	0.423	284.8	0.273
1426	285	0.681	285	0.423	285	0.273
1427	285.2	0.681	285.2	0.423	285.2	0.272
1428	285.4	0.68	285.4	0.424	285.4	0.273
1429	285.6	0.68	285.6	0.424	285.6	0.273
1430	285.8	0.68	285.8	0.425	285.8	0.273
1431	286	0.68	286	0.425	286	0.273
1432	286.2	0.679	286.2	0.425	286.2	0.273
1433	286.4	0.679	286.4	0.425	286.4	0.272
1434	286.6	0.678	286.6	0.425	286.6	0.272
1435	286.8	0.678	286.8	0.424	286.8	0.272
1436	287	0.678	287	0.424	287	0.272
1437	287.2	0.678	287.2	0.424	287.2	0.271
1438	287.4	0.678	287.4	0.424	287.4	0.271
1439	287.6	0.679	287.6	0.423	287.6	0.271
1440	287.8	0.68	287.8	0.423	287.8	0.272
1441	288	0.68	288	0.423	288	0.272
1442	288.2	0.681	288.2	0.422	288.2	0.272
1443	288.4	0.682	288.4	0.422	288.4	0.273
1444	288.6	0.682	288.6	0.422	288.6	0.273
1445	288.8	0.683	288.8	0.422	288.8	0.273
1446	289	0.683	289	0.422	289	0.273
1447	289.2	0.684	289.2	0.422	289.2	0.273
1448	289.4	0.684	289.4	0.422	289.4	0.273
1449	289.6	0.684	289.6	0.423	289.6	0.273
1450	289.8	0.684	289.8	0.423	289.8	0.273
1451	290	0.684	290	0.423	290	0.273
1452	290.2	0.684	290.2	0.423	290.2	0.274
1453	290.4	0.684	290.4	0.424	290.4	0.273
1454	290.6	0.684	290.6	0.424	290.6	0.273
1455	290.8	0.683	290.8	0.424	290.8	0.273
1456	291	0.683	291	0.424	291	0.273
1457	291.2	0.683	291.2	0.424	291.2	0.273
1458	291.4	0.684	291.4	0.424	291.4	0.273
1459	291.6	0.684	291.6	0.424	291.6	0.273
1460	291.8	0.684	291.8	0.424	291.8	0.273
1461	292	0.685	292	0.425	292	0.273
1462	292.2	0.685	292.2	0.425	292.2	0.273
1463	292.4	0.685	292.4	0.425	292.4	0.273
1464	292.6	0.685	292.6	0.425	292.6	0.273
1465	292.8	0.685	292.8	0.425	292.8	0.274
1466	293	0.685	293	0.425	293	0.274
1467	293.2	0.685	293.2	0.425	293.2	0.274
1468	293.4	0.686	293.4	0.425	293.4	0.274
1469	293.6	0.686	293.6	0.425	293.6	0.275
1470	293.8	0.686	293.8	0.424	293.8	0.275
1471	294	0.687	294	0.424	294	0.276
1472	294.2	0.687	294.2	0.425	294.2	0.276
1473	294.4	0.687	294.4	0.424	294.4	0.276
1474	294.6	0.688	294.6	0.424	294.6	0.276
1475	294.8	0.688	294.8	0.424	294.8	0.277
1476	295	0.688	295	0.424	295	0.277
1477	295.2	0.688	295.2	0.424	295.2	0.277
1478	295.4	0.687	295.4	0.424	295.4	0.277
1479	295.6	0.687	295.6	0.424	295.6	0.277
1480	295.8	0.687	295.8	0.424	295.8	0.277
1481	296	0.687	296	0.424	296	0.277
1482	296.2	0.687	296.2	0.424	296.2	0.277
1483	296.4	0.687	296.4	0.424	296.4	0.277
1484	296.6	0.687	296.6	0.425	296.6	0.277
1485	296.8	0.687	296.8	0.425	296.8	0.277
1486	297	0.688	297	0.425	297	0.277
1487	297.2	0.688	297.2	0.425	297.2	0.277
1488	297.4	0.689	297.4	0.425	297.4	0.277
1489	297.6	0.69	297.6	0.425	297.6	0.277
1490	297.8	0.69	297.8	0.425	297.8	0.277
1491	298	0.69	298	0.425	298	0.277
1492	298.2	0.69	298.2	0.425	298.2	0.277
1493	298.4	0.69	298.4	0.425	298.4	0.278
1494	298.6	0.69	298.6	0.425	298.6	0.278
1495	298.8	0.69	298.8	0.425	298.8	0.278
1496	299	0.69	299	0.424	299	0.278
1497	299.2	0.69	299.2	0.424	299.2	0.278
1498	299.4	0.689	299.4	0.424	299.4	0.278
1499	299.6	0.689	299.6	0.424	299.6	0.278
1500	299.8	0.689	299.8	0.424	299.8	0.278
1501	300	0.688	300	0.424	300	0.278
1502	300.2	0.688	300.2	0.425	300.2	0.278
1503	300.4	0.688	300.4	0.425	300.4	0.278
1504	300.6	0.688	300.6	0.425	300.6	0.278
1505	300.8	0.688	300.8	0.425	300.8	0.278
1506	301	0.689	301	0.425	301	0.277
1507	301.2	0.689	301.2	0.425	301.2	0.277
1508	301.4	0.69	301.4	0.425	301.4	0.277
1509	301.6	0.691	301.6	0.425	301.6	0.277
1510	301.8	0.691	301.8	0.425	301.8	0.276
1511	302	0.692	302	0.426	302	0.276
1512	302.2	0.692	302.2	0.426	302.2	0.276
1513	302.4	0.692	302.4	0.426	302.4	0.276
1514	302.6	0.693	302.6	0.426	302.6	0.276
1515	302.8	0.693	302.8	0.426	302.8	0.276
1516	303	0.693	303	0.426	303	0.276
1517	303.2	0.693	303.2	0.426	303.2	0.276
1518	303.4	0.693	303.4	0.426	303.4	0.276
1519	303.6	0.693	303.6	0.426	303.6	0.277
1520	303.8	0.693	303.8	0.426	303.8	0.277
1521	304	0.693	304	0.425	304	0.278
1522	304.2	0.693	304.2	0.425	304.2	0.278
1523	304.4	0.693	304.4	0.425	304.4	0.278
1524	304.6	0.693	304.6	0.425	304.6	0.279
1525	304.8	0.694	304.8	0.424	304.8	0.279
1526	305	0.695	305	0.424	305	0.279
1527	305.2	0.695	305.2	0.424	305.2	0.279
1528	305.4	0.695	305.4	0.424	305.4	0.279
1529	305.6	0.695	305.6	0.425	305.6	0.28
1530	305.8	0.695	305.8	0.425	305.8	0.28
1531	306	0.695	306	0.425	306	0.28
1532	306.2	0.695	306.2	0.426	306.2	0.28
1533	306.4	0.695	306.4	0.426	306.4	0.28
1534	306.6	0.694	306.6	0.426	306.6	0.28
1535	306.8	0.695	306.8	0.426	306.8	0.281
1536	307	0.694	307	0.426	307	0.281
1537	307.2	0.695	307.2	0.426	307.2	0.281
1538	307.4	0.695	307.4	0.427	307.4	0.28
1539	307.6	0.695	307.6	0.427	307.6	0.28
1540	307.8	0.695	307.8	0.427	307.8	0.28
1541	308	0.696	308	0.426	308	0.28
1542	308.2	0.696	308.2	0.426	308.2	0.279
1543	308.4	0.697	308.4	0.426	308.4	0.279
1544	308.6	0.697	308.6	0.426	308.6	0.278
1545	308.8	0.698	308.8	0.426	308.8	0.278
1546	309	0.698	309	0.426	309	0.278
1547	309.2	0.698	309.2	0.426	309.2	0.278
1548	309.4	0.698	309.4	0.426	309.4	0.279
1549	309.6	0.698	309.6	0.425	309.6	0.279
1550	309.8	0.698	309.8	0.425	309.8	0.279
1551	310	0.699	310	0.425	310	0.28
1552	310.2	0.699	310.2	0.425	310.2	0.28
1553	310.4	0.699	310.4	0.425	310.4	0.28
1554	310.6	0.699	310.6	0.425	310.6	0.281
1555	310.8	0.7	310.8	0.425	310.8	0.281
1556	311	0.699	311	0.425	311	0.282
1557	311.2	0.699	311.2	0.426	311.2	0.282
1558	311.4	0.699	311.4	0.426	311.4	0.282
1559	311.6	0.699	311.6	0.426	311.6	0.283
1560	311.8	0.699	311.8	0.426	311.8	0.283
1561	312	0.698	312	0.427	312	0.282
1562	312.2	0.698	312.2	0.427	312.2	0.282
1563	312.4	0.698	312.4	0.427	312.4	0.282
1564	312.6	0.698	312.6	0.427	312.6	0.282
1565	312.8	0.698	312.8	0.427	312.8	0.282
1566	313	0.698	313	0.427	313	0.282
1567	313.2	0.698	313.2	0.427	313.2	0.282
1568	313.4	0.699	313.4	0.427	313.4	0.282
1569	313.6	0.699	313.6	0.427	313.6	0.281
1570	313.8	0.699	313.8	0.427	313.8	0.281
1571	314	0.699	314	0.427	314	0.281
1572	314.2	0.7	314.2	0.427	314.2	0.281
1573	314.4	0.7	314.4	0.427	314.4	0.281
1574	314.6	0.7	314.6	0.427	314.6	0.281
1575	314.8	0.7	314.8	0.427	314.8	0.281
1576	315	0.7	315	0.428	315	0.281
1577	315.2	0.699	315.2	0.428	315.2	0.282
1578	315.4	0.699	315.4	0.428	315.4	0.282
1579	315.6	0.699	315.6	0.428	315.6	0.283
1580	315.8	0.698	315.8	0.428	315.8	0.283
1581	316	0.698	316	0.428	316	0.284
1582	316.2	0.698	316.2	0.428	316.2	0.284
1583	316.4	0.699	316.4	0.428	316.4	0.284
1584	316.6	0.699	316.6	0.428	316.6	0.284
1585	316.8	0.7	316.8	0.429	316.8	0.284
1586	317	0.7	317	0.429	317	0.284
1587	317.2	0.701	317.2	0.429	317.2	0.284
1588	317.4	0.701	317.4	0.43	317.4	0.284
1589	317.6	0.701	317.6	0.43	317.6	0.283
1590	317.8	0.701	317.8	0.43	317.8	0.283
1591	318	0.702	318	0.43	318	0.283
1592	318.2	0.702	318.2	0.43	318.2	0.283
1593	318.4	0.702	318.4	0.43	318.4	0.282
1594	318.6	0.703	318.6	0.43	318.6	0.282
1595	318.8	0.703	318.8	0.43	318.8	0.282
1596	319	0.703	319	0.43	319	0.282
1597	319.2	0.703	319.2	0.43	319.2	0.283
1598	319.4	0.704	319.4	0.43	319.4	0.283
1599	319.6	0.704	319.6	0.43	319.6	0.284
1600	319.8	0.704	319.8	0.43	319.8	0.284
1601	320	0.704	320	0.43	320	0.285
1602	320.2	0.705	320.2	0.43	320.2	0.285
1603	320.4	0.705	320.4	0.43	320.4	0.285
1604	320.6	0.704	320.6	0.43	320.6	0.285
1605	320.8	0.704	320.8	0.43	320.8	0.286
1606	321	0.704	321	0.43	321	0.286
1607	321.2	0.703	321.2	0.43	321.2	0.286
1608	321.4	0.703	321.4	0.43	321.4	0.286
1609	321.6	0.703	321.6	0.43	321.6	0.286
1610	321.8	0.703	321.8	0.43	321.8	0.286
1611	322	0.703	322	0.429	322	0.286
1612	322.2	0.704	322.2	0.429	322.2	0.286
1613	322.4	0.704	322.4	0.429	322.4	0.285
1614	322.6	0.704	322.6	0.429	322.6	0.285
1615	322.8	0.704	322.8	0.429	322.8	0.285
1616	323	0.705	323	0.429	323	0.285
1617	323.2	0.705	323.2	0.429	323.2	0.285
1618	323.4	0.705	323.4	0.429	323.4	0.285
1619	323.6	0.706	323.6	0.429	323.6	0.285
1620	323.8	0.706	323.8	0.43	323.8	0.285
1621	324	0.706	324	0.43	324	0.285
1622	324.2	0.707	324.2	0.43	324.2	0.284
1623	324.4	0.707	324.4	0.43	324.4	0.284
1624	324.6	0.707	324.6	0.43	324.6	0.284
1625	324.8	0.707	324.8	0.43	324.8	0.284
1626	325	0.707	325	0.43	325	0.285
1627	325.2	0.708	325.2	0.43	325.2	0.285
1628	325.4	0.708	325.4	0.43	325.4	0.286
1629	325.6	0.709	325.6	0.429	325.6	0.286
1630	325.8	0.709	325.8	0.429	325.8	0.287
1631	326	0.708	326	0.429	326	0.288
1632	326.2	0.708	326.2	0.428	326.2	0.288
1633	326.4	0.708	326.4	0.428	326.4	0.288
1634	326.6	0.707	326.6	0.428	326.6	0.288
1635	326.8	0.707	326.8	0.428	326.8	0.289
1636	327	0.707	327	0.428	327	0.288
1637	327.2	0.706	327.2	0.428	327.2	0.288
1638	327.4	0.706	327.4	0.428	327.4	0.288
1639	327.6	0.706	327.6	0.427	327.6	0.287
1640	327.8	0.706	327.8	0.427	327.8	0.287
1641	328	0.707	328	0.427	328	0.286
1642	328.2	0.707	328.2	0.427	328.2	0.286
1643	328.4	0.707	328.4	0.427	328.4	0.285
1644	328.6	0.708	328.6	0.428	328.6	0.285
1645	328.8	0.708	328.8	0.428	328.8	0.285
1646	329	0.708	329	0.428	329	0.285
1647	329.2	0.709	329.2	0.429	329.2	0.285
1648	329.4	0.709	329.4	0.429	329.4	0.285
1649	329.6	0.709	329.6	0.429	329.6	0.286
1650	329.8	0.709	329.8	0.429	329.8	0.286
1651	330	0.709	330	0.429	330	0.286
1652	330.2	0.685	330.2	0.415	330.2	0.275
1653	330.4	0.658	330.4	0.399	330.4	0.264
1654	330.6	0.631	330.6	0.382	330.6	0.252
1655	330.8	0.602	330.8	0.365	330.8	0.24
1656	331	0.575	331	0.347	331	0.229
1657	331.2	0.548	331.2	0.331	331.2	0.218
1658	331.4	0.523	331.4	0.315	331.4	0.208
1659	331.6	0.502	331.6	0.301	331.6	0.199
1660	331.8	0.484	331.8	0.29	331.8	0.193
1661	332	0.471	332	0.281	332	0.188
1662	332.2	0.464	332.2	0.276	332.2	0.186
1663	332.4	0.457	332.4	0.271	332.4	0.184
1664	332.6	0.451	332.6	0.266	332.6	0.181
1665	332.8	0.445	332.8	0.262	332.8	0.177
1666	333	0.441	333	0.259	333	0.175
1667	333.2	0.435	333.2	0.255	333.2	0.173
1668	333.4	0.431	333.4	0.251	333.4	0.17
1669	333.6	0.426	333.6	0.247	333.6	0.168
1670	333.8	0.422	333.8	0.243	333.8	0.166
1671	334	0.418	334	0.24	334	0.165
1672	334.2	0.415	334.2	0.237	334.2	0.163
1673	334.4	0.412	334.4	0.234	334.4	0.161
1674	334.6	0.409	334.6	0.231	334.6	0.159
1675	334.8	0.406	334.8	0.228	334.8	0.157
1676	335	0.404	335	0.225	335	0.156
1677	335.2	0.402	335.2	0.222	335.2	0.154
1678	335.4	0.4	335.4	0.22	335.4	0.152
1679	335.6	0.398	335.6	0.218	335.6	0.151
1680	335.8	0.396	335.8	0.215	335.8	0.149
1681	336	0.393	336	0.213	336	0.147
1682	336.2	0.391	336.2	0.212	336.2	0.146
1683	336.4	0.388	336.4	0.21	336.4	0.145
1684	336.6	0.386	336.6	0.208	336.6	0.144
1685	336.8	0.384	336.8	0.206	336.8	0.142
1686	337	0.382	337	0.204	337	0.141
1687	337.2	0.38	337.2	0.202	337.2	0.141
1688	337.4	0.378	337.4	0.2	337.4	0.14
1689	337.6	0.377	337.6	0.198	337.6	0.139
1690	337.8	0.375	337.8	0.196	337.8	0.139
1691	338	0.373	338	0.195	338	0.138
1692	338.2	0.371	338.2	0.194	338.2	0.138
1693	338.4	0.369	338.4	0.192	338.4	0.137
1694	338.6	0.368	338.6	0.191	338.6	0.137
1695	338.8	0.366	338.8	0.189	338.8	0.136
1696	339	0.365	339	0.188	339	0.135
1697	339.2	0.363	339.2	0.187	339.2	0.134
1698	339.4	0.361	339.4	0.185	339.4	0.133
1699	339.6	0.36	339.6	0.184	339.6	0.133
1700	339.8	0.358	339.8	0.183	339.8	0.132
1701	340	0.356	340	0.182	340	0.132
1702	340.2	0.355	340.2	0.181	340.2	0.131
1703	340.4	0.354	340.4	0.18	340.4	0.131
1704	340.6	0.352	340.6	0.179	340.6	0.131
1705	340.8	0.351	340.8	0.178	340.8	0.13
1706	341	0.35	341	0.177	341	0.13
1707	341.2	0.349	341.2	0.175	341.2	0.13
1708	341.4	0.348	341.4	0.174	341.4	0.129
1709	341.6	0.347	341.6	0.173	341.6	0.129
1710	341.8	0.346	341.8	0.172	341.8	0.129
1711	342	0.345	342	0.171	342	0.128
1712	342.2	0.344	342.2	0.17	342.2	0.128
1713	342.4	0.343	342.4	0.169	342.4	0.127
1714	342.6	0.342	342.6	0.168	342.6	0.126
1715	342.8	0.341	342.8	0.167	342.8	0.125
1716	343	0.34	343	0.166	343	0.124
1717	343.2	0.339	343.2	0.166	343.2	0.124
1718	343.4	0.338	343.4	0.165	343.4	0.123
1719	343.6	0.337	343.6	0.164	343.6	0.123
1720	343.8	0.335	343.8	0.164	343.8	0.122
1721	344	0.334	344	0.163	344	0.122
1722	344.2	0.333	344.2	0.162	344.2	0.121
1723	344.4	0.332	344.4	0.161	344.4	0.121
1724	344.6	0.331	344.6	0.161	344.6	0.121
1725	344.8	0.331	344.8	0.16	344.8	0.12
1726	345	0.331	345	0.159	345	0.119
1727	345.2	0.33	345.2	0.158	345.2	0.119
1728	345.4	0.33	345.4	0.157	345.4	0.118
1729	345.6	0.33	345.6	0.156	345.6	0.118
1730	345.8	0.33	345.8	0.156	345.8	0.117
1731	346	0.33	346	0.155	346	0.116
1732	346.2	0.33	346.2	0.154	346.2	0.116
1733	346.4	0.329	346.4	0.154	346.4	0.115
1734	346.6	0.328	346.6	0.153	346.6	0.115
1735	346.8	0.328	346.8	0.153	346.8	0.114
1736	347	0.327	347	0.152	347	0.114
1737	347.2	0.326	347.2	0.152	347.2	0.114
1738	347.4	0.325	347.4	0.151	347.4	0.114
1739	347.6	0.324	347.6	0.151	347.6	0.113
1740	347.8	0.323	347.8	0.15	347.8	0.113
1741	348	0.321	348	0.15	348	0.113
1742	348.2	0.32	348.2	0.15	348.2	0.113
1743	348.4	0.319	348.4	0.149	348.4	0.113
1744	348.6	0.319	348.6	0.149	348.6	0.112
1745	348.8	0.318	348.8	0.148	348.8	0.112
1746	349	0.318	349	0.148	349	0.111
1747	349.2	0.317	349.2	0.147	349.2	0.111
1748	349.4	0.317	349.4	0.147	349.4	0.11
1749	349.6	0.316	349.6	0.146	349.6	0.11
1750	349.8	0.315	349.8	0.146	349.8	0.109
1751	350	0.314	350	0.145	350	0.109
1752	350.2	0.313	350.2	0.144	350.2	0.109
1753	350.4	0.312	350.4	0.143	350.4	0.108
1754	350.6	0.311	350.6	0.142	350.6	0.108
1755	350.8	0.311	350.8	0.141	350.8	0.107
1756	351	0.31	351	0.14	351	0.107
1757	351.2	0.31	351.2	0.139	351.2	0.106
1758	351.4	0.309	351.4	0.139	351.4	0.105
1759	351.6	0.309	351.6	0.138	351.6	0.105
1760	351.8	0.308	351.8	0.138	351.8	0.105
1761	352	0.308	352	0.137	352	0.105
1762	352.2	0.308	352.2	0.137	352.2	0.105
1763	352.4	0.307	352.4	0.137	352.4	0.105
1764	352.6	0.307	352.6	0.137	352.6	0.105
1765	352.8	0.306	352.8	0.137	352.8	0.104
1766	353	0.306	353	0.137	353	0.104
1767	353.2	0.306	353.2	0.136	353.2	0.104
1768	353.4	0.305	353.4	0.136	353.4	0.104
1769	353.6	0.305	353.6	0.136	353.6	0.104
1770	353.8	0.305	353.8	0.136	353.8	0.104
1771	354	0.304	354	0.135	354	0.104
1772	354.2	0.304	354.2	0.135	354.2	0.104
1773	354.4	0.303	354.4	0.134	354.4	0.104
1774	354.6	0.303	354.6	0.134	354.6	0.104
1775	354.8	0.303	354.8	0.133	354.8	0.103
1776	355	0.303	355	0.132	355	0.102
1777	355.2	0.303	355.2	0.132	355.2	0.102
1778	355.4	0.303	355.4	0.131	355.4	0.101
1779	355.6	0.302	355.6	0.131	355.6	0.101
1780	355.8	0.302	355.8	0.13	355.8	0.1
1781	356	0.301	356	0.13	356	0.1
1782	356.2	0.301	356.2	0.129	356.2	0.1
1783	356.4	0.3	356.4	0.129	356.4	0.1
1784	356.6	0.299	356.6	0.128	356.6	0.099
1785	356.8	0.298	356.8	0.128	356.8	0.099
1786	357	0.297	357	0.127	357	0.099
1787	357.2	0.296	357.2	0.126	357.2	0.099
1788	357.4	0.296	357.4	0.126	357.4	0.098
1789	357.6	0.295	357.6	0.126	357.6	0.098
1790	357.8	0.295	357.8	0.126	357.8	0.098
1791	358	0.294	358	0.125	358	0.097
1792	358.2	0.294	358.2	0.125	358.2	0.097
1793	358.4	0.294	358.4	0.124	358.4	0.097
1794	358.6	0.294	358.6	0.124	358.6	0.097
1795	358.8	0.294	358.8	0.123	358.8	0.097
1796	359	0.294	359	0.123	359	0.097
1797	359.2	0.294	359.2	0.122	359.2	0.097
1798	359.4	0.294	359.4	0.122	359.4	0.097
1799	359.6	0.294	359.6	0.122	359.6	0.097
1800	359.8	0.294	359.8	0.122	359.8	0.096
1801	360	0.293	360	0.122	360	0.096
1802	360.2	0.293	360.2	0.122	360.2	0.096
1803	360.4	0.292	360.4	0.121	360.4	0.097
1804	360.6	0.291	360.6	0.121	360.6	0.097
1805	360.8	0.291	360.8	0.121	360.8	0.097
1806	361	0.29	361	0.12	361	0.097
1807	361.2	0.289	361.2	0.12	361.2	0.097
1808	361.4	0.289	361.4	0.12	361.4	0.096
1809	361.6	0.289	361.6	0.12	361.6	0.096
1810	361.8	0.289	361.8	0.12	361.8	0.096
1811	362	0.289	362	0.119	362	0.096
1812	362.2	0.289	362.2	0.118	362.2	0.096
1813	362.4	0.289	362.4	0.118	362.4	0.097
1814	362.6	0.289	362.6	0.117	362.6	0.097
1815	362.8	0.289	362.8	0.116	362.8	0.097
1816	363	0.289	363	0.116	363	0.097
1817	363.2	0.288	363.2	0.116	363.2	0.097
1818	363.4	0.288	363.4	0.115	363.4	0.097
1819	363.6	0.288	363.6	0.115	363.6	0.096
1820	363.8	0.288	363.8	0.115	363.8	0.096
1821	364	0.287	364	0.114	364	0.096
1822	364.2	0.287	364.2	0.114	364.2	0.095
1823	364.4	0.286	364.4	0.114	364.4	0.095
1824	364.6	0.286	364.6	0.114	364.6	0.094
1825	364.8	0.285	364.8	0.113	364.8	0.093
1826	365	0.285	365	0.113	365	0.092
1827	365.2	0.285	365.2	0.113	365.2	0.092
1828	365.4	0.284	365.4	0.113	365.4	0.091
1829	365.6	0.284	365.6	0.113	365.6	0.09
1830	365.8	0.284	365.8	0.112	365.8	0.089
1831	366	0.284	366	0.112	366	0.088
1832	366.2	0.283	366.2	0.112	366.2	0.088
1833	366.4	0.282	366.4	0.111	366.4	0.088
1834	366.6	0.282	366.6	0.111	366.6	0.088
1835	366.8	0.282	366.8	0.111	366.8	0.088
1836	367	0.282	367	0.111	367	0.088
1837	367.2	0.282	367.2	0.11	367.2	0.088
1838	367.4	0.282	367.4	0.11	367.4	0.088
1839	367.6	0.282	367.6	0.11	367.6	0.088
1840	367.8	0.282	367.8	0.109	367.8	0.088
1841	368	0.282	368	0.109	368	0.088
1842	368.2	0.282	368.2	0.109	368.2	0.088
1843	368.4	0.282	368.4	0.108	368.4	0.088
1844	368.6	0.282	368.6	0.108	368.6	0.088
1845	368.8	0.282	368.8	0.108	368.8	0.088
1846	369	0.282	369	0.108	369	0.087
1847	369.2	0.282	369.2	0.107	369.2	0.087
1848	369.4	0.282	369.4	0.107	369.4	0.087
1849	369.6	0.281	369.6	0.106	369.6	0.087
1850	369.8	0.281	369.8	0.106	369.8	0.087
1851	370	0.28	370	0.106	370	0.087
1852	370.2	0.279	370.2	0.105	370.2	0.087
1853	370.4	0.278	370.4	0.105	370.4	0.086
1854	370.6	0.278	370.6	0.105	370.6	0.086
1855	370.8	0.278	370.8	0.105	370.8	0.086
1856	371	0.278	371	0.104	371	0.086
1857	371.2	0.277	371.2	0.104	371.2	0.086
1858	371.4	0.277	371.4	0.104	371.4	0.086
1859	371.6	0.277	371.6	0.104	371.6	0.086
1860	371.8	0.277	371.8	0.104	371.8	0.086
1861	372	0.277	372	0.103	372	0.086
1862	372.2	0.277	372.2	0.103	372.2	0.085
1863	372.4	0.278	372.4	0.102	372.4	0.085
1864	372.6	0.278	372.6	0.102	372.6	0.085
1865	372.8	0.278	372.8	0.102	372.8	0.085
1866	373	0.278	373	0.101	373	0.085
1867	373.2	0.277	373.2	0.101	373.2	0.086
1868	373.4	0.277	373.4	0.101	373.4	0.086
1869	373.6	0.277	373.6	0.1	373.6	0.086
1870	373.8	0.276	373.8	0.1	373.8	0.086
1871	374	0.276	374	0.1	374	0.086
1872	374.2	0.276	374.2	0.1	374.2	0.086
1873	374.4	0.276	374.4	0.099	374.4	0.085
1874	374.6	0.276	374.6	0.099	374.6	0.085
1875	374.8	0.275	374.8	0.099	374.8	0.085
1876	375	0.274	375	0.099	375	0.085
1877	375.2	0.274	375.2	0.098	375.2	0.085
1878	375.4	0.274	375.4	0.098	375.4	0.084
1879	375.6	0.274	375.6	0.098	375.6	0.084
1880	375.8	0.275	375.8	0.098	375.8	0.083
1881	376	0.275	376	0.098	376	0.083
1882	376.2	0.275	376.2	0.098	376.2	0.082
1883	376.4	0.276	376.4	0.098	376.4	0.082
1884	376.6	0.276	376.6	0.098	376.6	0.082
1885	376.8	0.276	376.8	0.098	376.8	0.082
1886	377	0.275	377	0.098	377	0.083
1887	377.2	0.275	377.2	0.098	377.2	0.083
1888	377.4	0.275	377.4	0.098	377.4	0.083
1889	377.6	0.274	377.6	0.098	377.6	0.083
1890	377.8	0.273	377.8	0.098	377.8	0.083
1891	378	0.273	378	0.098	378	0.083
1892	378.2	0.273	378.2	0.097	378.2	0.083
1893	378.4	0.272	378.4	0.097	378.4	0.083
1894	378.6	0.271	378.6	0.097	378.6	0.083
1895	378.8	0.271	378.8	0.097	378.8	0.083
1896	379	0.27	379	0.097	379	0.083
1897	379.2	0.27	379.2	0.096	379.2	0.083
1898	379.4	0.269	379.4	0.096	379.4	0.083
1899	379.6	0.269	379.6	0.096	379.6	0.083
1900	379.8	0.269	379.8	0.095	379.8	0.083
1901	380	0.269	380	0.095	380	0.083
1902	380.2	0.269	380.2	0.094	380.2	0.083
1903	380.4	0.269	380.4	0.094	380.4	0.083
1904	380.6	0.269	380.6	0.093	380.6	0.083
1905	380.8	0.269	380.8	0.093	380.8	0.082
1906	381	0.269	381	0.093	381	0.082
1907	381.2	0.269	381.2	0.093	381.2	0.082
1908	381.4	0.269	381.4	0.093	381.4	0.082
1909	381.6	0.269	381.6	0.093	381.6	0.082
1910	381.8	0.269	381.8	0.093	381.8	0.082
1911	382	0.269	382	0.093	382	0.082
1912	382.2	0.269	382.2	0.093	382.2	0.082
1913	382.4	0.268	382.4	0.093	382.4	0.081
1914	382.6	0.268	382.6	0.093	382.6	0.081
1915	382.8	0.268	382.8	0.094	382.8	0.081
1916	383	0.267	383	0.094	383	0.081
1917	383.2	0.267	383.2	0.094	383.2	0.081
1918	383.4	0.267	383.4	0.093	383.4	0.081
1919	383.6	0.267	383.6	0.093	383.6	0.081
1920	383.8	0.266	383.8	0.093	383.8	0.08
1921	384	0.266	384	0.092	384	0.08
1922	384.2	0.266	384.2	0.092	384.2	0.079
1923	384.4	0.266	384.4	0.092	384.4	0.078
1924	384.6	0.265	384.6	0.091	384.6	0.078
1925	384.8	0.265	384.8	0.091	384.8	0.077
1926	385	0.265	385	0.091	385	0.077
1927	385.2	0.265	385.2	0.09	385.2	0.077
1928	385.4	0.264	385.4	0.09	385.4	0.077
1929	385.6	0.264	385.6	0.09	385.6	0.077
1930	385.8	0.264	385.8	0.09	385.8	0.077
1931	386	0.264	386	0.089	386	0.077
1932	386.2	0.263	386.2	0.089	386.2	0.076
1933	386.4	0.263	386.4	0.089	386.4	0.076
1934	386.6	0.262	386.6	0.089	386.6	0.076
1935	386.8	0.262	386.8	0.089	386.8	0.077
1936	387	0.262	387	0.09	387	0.077
1937	387.2	0.263	387.2	0.09	387.2	0.077
1938	387.4	0.263	387.4	0.09	387.4	0.077
1939	387.6	0.263	387.6	0.089	387.6	0.077
1940	387.8	0.263	387.8	0.089	387.8	0.077
1941	388	0.263	388	0.089	388	0.077
1942	388.2	0.263	388.2	0.088	388.2	0.077
1943	388.4	0.263	388.4	0.088	388.4	0.077
1944	388.6	0.263	388.6	0.088	388.6	0.077
1945	388.8	0.263	388.8	0.087	388.8	0.077
1946	389	0.263	389	0.087	389	0.077
1947	389.2	0.263	389.2	0.087	389.2	0.077
1948	389.4	0.263	389.4	0.086	389.4	0.077
1949	389.6	0.263	389.6	0.086	389.6	0.077
1950	389.8	0.263	389.8	0.086	389.8	0.077
1951	390	0.262	390	0.086	390	0.077
1952	390.2	0.262	390.2	0.086	390.2	0.077
1953	390.4	0.262	390.4	0.085	390.4	0.077
1954	390.6	0.262	390.6	0.085	390.6	0.077
1955	390.8	0.262	390.8	0.085	390.8	0.076
1956	391	0.262	391	0.085	391	0.076
1957	391.2	0.262	391.2	0.085	391.2	0.075
1958	391.4	0.261	391.4	0.085	391.4	0.075
1959	391.6	0.261	391.6	0.085	391.6	0.075
1960	391.8	0.26	391.8	0.085	391.8	0.074
1961	392	0.26	392	0.085	392	0.074
1962	392.2	0.26	392.2	0.085	392.2	0.074
1963	392.4	0.26	392.4	0.085	392.4	0.074
1964	392.6	0.26	392.6	0.085	392.6	0.074
1965	392.8	0.26	392.8	0.084	392.8	0.074
1966	393	0.259	393	0.084	393	0.074
1967	393.2	0.259	393.2	0.084	393.2	0.074
1968	393.4	0.259	393.4	0.083	393.4	0.074
1969	393.6	0.259	393.6	0.083	393.6	0.073
1970	393.8	0.259	393.8	0.083	393.8	0.074
1971	394	0.258	394	0.082	394	0.074
1972	394.2	0.258	394.2	0.082	394.2	0.073
1973	394.4	0.258	394.4	0.082	394.4	0.073
1974	394.6	0.258	394.6	0.082	394.6	0.073
1975	394.8	0.258	394.8	0.082	394.8	0.073
1976	395	0.258	395	0.082	395	0.073
1977	395.2	0.258	395.2	0.082	395.2	0.073
1978	395.4	0.258	395.4	0.083	395.4	0.073
1979	395.6	0.258	395.6	0.083	395.6	0.072
1980	395.8	0.258	395.8	0.083	395.8	0.072
1981	396	0.258	396	0.084	396	0.072
1982	396.2	0.258	396.2	0.084	396.2	0.072
1983	396.4	0.257	396.4	0.083	396.4	0.072
1984	396.6	0.257	396.6	0.083	396.6	0.072
1985	396.8	0.257	396.8	0.083	396.8	0.071
1986	397	0.257	397	0.082	397	0.072
1987	397.2	0.257	397.2	0.081	397.2	0.072
1988	397.4	0.257	397.4	0.081	397.4	0.072
1989	397.6	0.257	397.6	0.08	397.6	0.072
1990	397.8	0.257	397.8	0.079	397.8	0.072
1991	398	0.257	398	0.079	398	0.072
1992	398.2	0.257	398.2	0.078	398.2	0.072
1993	398.4	0.257	398.4	0.078	398.4	0.072
1994	398.6	0.257	398.6	0.078	398.6	0.072
1995	398.8	0.257	398.8	0.078	398.8	0.072
1996	399	0.257	399	0.079	399	0.072
1997	399.2	0.257	399.2	0.079	399.2	0.072
1998	399.4	0.257	399.4	0.079	399.4	0.072
1999	399.6	0.256	399.6	0.08	399.6	0.071
[truncated: 1,152 more rows]
