# Supplementary material for: The neuronal calcium sensor NCS-1 regulates the phosphorylation state and activity of the Gα chaperone and GEF Ric-8A
Source: eLife journal article supplement (doi:10.7554/elife.86151), 2023-11-27
Supplement: supp [file Fig6B-Anionic-exchange-chromatograms.xlsx]

## Sheet: NCS1Ric8a
	unP-NCS1/Ric8a452	P-NCS1/Ric8a452
Volume (ml)	A280 (mAU)	A280 (mAU)	Conductivity
1.01225	0.207	2.61069	9.966
1.04974	0.183	-0.020456	9.985
1.08723	0.13	-0.0715959	10.074
1.12472	0.071	-0.126571	10.129
1.16221	0.044	-0.166205	10.149
1.1997	0.027	-0.161091	10.153
1.23719	-0.082	-0.149584	10.142
1.27468	0.084	-0.145749	10.129
1.31217	0.134	-0.168762	10.116
1.34966	0.142	0.0946089	10.108
1.38715	0.135	0.231408	10.106
1.42464	0.123	0.239079	10.105
1.46213	0.116	0.240358	10.104
1.49963	0.118	0.253143	10.102
1.53712	0.117	0.28127	10.1
1.57461	0.122	0.311954	10.1
1.6121	0.121	0.345195	10.1
1.64959	0.121	0.369486	10.1
1.68708	0.11	0.366929	10.1
1.72457	0.121	0.382271	10.099
1.76206	0.135	0.407841	10.099
1.79955	0.133	0.329853	10.097
1.83704	0.139	0.0012785	10.095
1.87453	0.142	0.237801	10.095
1.91202	0.147	0.432133	10.094
1.94951	0.15	0.45131	10.094
1.987	0.15	0.480716	10.094
2.02449	0.157	0.53697	10.093
2.06198	0.207	0.626465	10.093
2.09948	0.395	0.733858	10.092
2.13697	1.101	0.820796	10.092
2.17446	2.671	0.892392	10.095
2.21195	5.534	0.96271	10.103
2.24944	9.803	1.04198	10.113
2.28693	14.615	1.13403	10.126
2.32442	19.028	1.23119	10.136
2.36191	22.777	1.36544	10.146
2.3994	25.952	1.5342	10.154
2.43689	28.743	1.73876	10.162
2.47438	30.808	1.96633	10.171
2.51187	32.459	2.24121	10.178
2.54936	34.04	2.5685	10.186
2.58685	35.148	2.9968	10.191
2.62434	36.088	3.6987	10.195
2.66183	36.814	4.91966	10.197
2.69933	37.265	6.69678	10.198
2.73682	37.745	9.77668	10.197
2.77431	38.059	14.2361	10.197
2.8118	38.334	19.8014	10.198
2.84929	38.556	27.4494	10.198
2.88678	38.697	36.0818	10.196
2.92427	38.83	47.3837	10.192
2.96176	38.917	59.0551	10.187
2.99925	38.974	71.6266	10.182
3.03674	39.041	84.3784	10.178
3.07423	39.082	97.7579	10.174
3.11172	39.12	111.008	10.17
3.14921	39.148	122.577	10.166
3.1867	39.171	134.882	10.162
3.22419	39.203	146.582	10.159
3.26168	39.242	156.886	10.155
3.29918	39.258	167.481	10.152
3.33667	39.284	175.634	10.148
3.37416	39.312	183.654	10.146
3.41165	39.332	190.76	10.144
3.44914	39.352	196.495	10.143
3.48663	39.344	201.376	10.141
3.52412	39.324	205.461	10.139
3.56161	39.291	208.553	10.136
3.5991	39.231	210.679	10.134
3.63659	39.147	212.224	10.131
3.67408	39.035	213.156	10.13
3.71157	38.896	213.481	10.127
3.74906	38.754	213.468	10.124
3.78655	38.544	212.846	10.121
3.82404	38.335	211.948	10.118
3.86153	38.094	210.654	10.112
3.89903	37.863	209.017	10.108
3.93652	37.586	207.182	10.104
3.97401	37.324	205.364	10.102
4.0115	37.017	203.246	10.098
4.04899	36.716	201.261	10.094
4.08648	36.369	199.198	10.09
4.12397	36.022	197.242	10.087
4.16146	35.685	195.342	10.083
4.19895	35.364	193.699	10.078
4.23644	34.995	192.187	10.071
4.27393	34.65	190.921	10.067
4.31142	34.302	189.605	10.063
4.34891	33.994	186.086	10.06
4.3864	33.653	176.804	10.054
4.42389	33.358	157.383	10.051
4.46138	33.089	135.15	10.046
4.49888	32.84	118.868	10.041
4.53637	32.575	105.691	10.035
4.57386	32.372	96.5638	10.032
4.61135	32.158	89.3824	10.029
4.64884	31.944	83.9872	10.025
4.68633	31.577	80.2092	10.021
4.72382	30.76	77.4412	10.018
4.76131	28.797	75.5861	10.012
4.7988	25.699	74.0021	10.005
4.83629	20.897	72.8412	9.995
4.87378	16.509	71.835	9.984
4.91127	12.314	70.9912	9.971
4.94876	9.895	70.43	9.96
4.98625	8.08	69.8725	9.951
5.02374	6.94	69.4263	9.945
5.06123	6.114	69.0441	9.938
5.09873	5.325	68.658	9.932
5.13622	4.537	68.3639	9.927
5.17371	3.963	68.0686	9.925
5.2112	3.282	67.8678	9.922
5.24869	2.789	67.6403	9.922
5.28618	2.285	67.4421	9.921
5.32367	1.851	67.2733	9.92
5.36116	1.499	67.0969	9.92
5.39865	1.15	66.9575	9.92
5.43614	0.819	66.785	9.918
5.47363	0.542	66.6494	9.917
5.51112	0.28	66.5523	9.916
5.54861	0.075	66.4231	9.917
5.5861	-0.132	66.3081	9.919
5.62359	-0.318	66.2122	9.919
5.66108	-0.496	66.115	9.921
5.69858	-0.656	66.0358	9.923
5.73607	-0.802	65.9514	9.922
5.77356	-0.922	65.8926	9.923
5.81105	-1.046	65.8337	9.923
5.84854	-1.159	65.7762	9.922
5.88603	-1.283	65.7187	9.921
5.92352	-1.396	65.6624	9.921
5.96101	-1.504	65.6241	9.922
5.9985	-1.606	65.5934	9.922
6.03599	-1.708	65.5653	9.919
6.07348	-1.782	65.4975	9.919
6.11097	-1.869	65.463	9.919
6.14846	-1.914	65.5128	9.919
6.18595	-1.964	65.4131	9.917
6.22344	-1.998	65.3684	9.915
6.26093	-2.025	65.3287	9.915
6.29843	-2.049	65.3057	9.915
6.33592	-2.05	65.2533	9.913
6.37341	-2.056	65.1919	9.913
6.4109	-2.058	65.1306	9.914
6.44839	-2.058	65.05	9.914
6.48588	-2.038	64.9708	9.911
6.52337	-2.037	64.871	9.91
6.56086	-2.025	64.756	9.91
6.59835	-2.01	64.6422	9.909
6.63584	-1.979	64.5182	9.908
6.67333	-1.952	64.3942	9.908
6.71082	-1.905	64.2561	9.907
6.74831	-1.854	64.1193	9.905
6.7858	-1.81	63.9927	9.904
6.82329	-1.778	63.8661	9.903
6.86078	-1.741	63.7562	9.903
6.89828	-1.692	63.6424	9.903
6.93577	-1.638	63.5491	9.902
6.97326	-1.589	63.4864	9.902
7.01075	-1.538	63.4199	9.902
7.04824	-1.489	63.3471	9.901
7.08573	-1.441	63.3062	9.898
7.12322	-1.399	63.2768	9.896
7.16071	-1.352	63.2614	9.9
7.1982	-1.289	63.2512	9.902
7.23569	-1.22	63.2333	9.903
7.27318	-1.149	63.2563	9.903
7.31067	-1.079	63.2576	9.904
7.34816	-1.026	63.2333	9.905
7.38565	-0.985	63.2077	9.906
7.42314	-0.927	63.1962	9.906
7.46064	-0.857	63.1502	9.906
7.49813	-0.793	63.0658	9.906
7.53562	-0.725	62.9648	9.907
7.57311	-0.65	62.7948	9.907
7.6106	-0.583	62.5442	9.909
7.64809	-0.524	62.2642	9.91
7.68558	-0.459	61.8806	9.909
7.72307	-0.402	61.3782	9.908
7.76056	-0.345	60.7939	9.909
7.79805	-0.291	60	9.91
7.83554	-0.24	58.9887	9.91
7.87303	-0.184	57.9186	9.91
7.91052	-0.142	56.5148	9.91
7.94801	-0.079	54.9192	9.91
7.9855	-0.026	53.1549	9.909
8.02299	0.022	50.9034	9.908
8.06049	0.077	48.4027	9.908
8.09798	0.123	45.7536	9.908
8.13547	0.178	42.5574	9.908
8.17296	0.224	39.434	9.908
8.21045	0.271	36.2761	9.908
8.24794	0.307	33.1323	9.908
8.28543	0.35	29.9028	9.908
8.32292	0.37	26.7513	9.907
8.36041	0.41	23.5244	9.906
8.3979	0.435	20.8932	9.907
8.43539	0.469	18.4449	9.909
8.47288	0.491	16.017	9.909
8.51037	0.526	14.2744	9.908
8.54786	0.547	12.3132	9.907
8.58535	0.574	10.8519	9.906
8.62284	0.595	9.48007	9.906
8.66034	0.606	8.43042	9.906
8.69783	0.628	7.52908	9.906
8.73532	0.649	6.70573	9.905
8.77281	0.663	6.08821	9.904
8.8103	0.686	5.51672	9.903
8.84779	0.706	5.09354	9.902
8.88528	0.716	4.68314	9.901
8.92277	0.733	4.34306	9.901
8.96026	0.74	4.06691	9.9
8.99775	0.758	3.83038	9.899
9.03524	0.771	3.65011	9.899
9.07273	0.784	3.50564	9.899
9.11022	0.792	3.3893	9.9
9.14771	0.799	3.26656	9.9
9.1852	0.809	3.1694	9.9
9.22269	0.814	3.06328	9.899
9.26019	0.819	2.96612	9.899
9.29768	0.83	2.96484	9.898
9.33517	0.851	2.89708	9.898
9.37266	0.852	2.84466	9.896
9.41015	0.867	2.79352	9.895
9.44764	0.869	2.74622	9.893
9.48513	0.872	2.72192	9.893
9.52262	0.894	2.64777	9.892
9.56011	0.895	2.62092	9.893
9.5976	0.897	2.60175	9.891
9.63509	0.904	2.61453	9.89
9.67258	0.916	2.59535	9.89
9.71007	0.92	2.54549	9.89
9.74756	0.932	2.52887	9.891
9.78505	0.942	2.51225	9.892
9.82254	0.94	2.56595	9.892
9.86004	0.947	2.57234	9.89
9.89753	0.955	2.52887	9.889
9.93502	0.954	2.53143	9.889
9.97251	0.963	2.23226	9.889
10.01	0.964	2.23609	9.888
10.0475	0.987	2.18623	9.887
10.085	0.992	2.13765	9.885
10.1225	0.997	2.03537	9.884
10.16	0.994	2.07245	9.885
10.1975	1	2.21308	9.885
10.2349	1.022	2.2297	9.884
10.2724	1.024	2.24121	9.882
10.3099	1.028	2.22587	9.881
10.3474	1.043	2.2297	9.88
10.3849	1.041	2.2476	9.88
10.4224	1.051	2.25016	9.88
10.4599	1.042	2.25655	9.88
10.4974	1.043	2.27829	9.877
10.5349	1.049	2.30002	9.875
10.5724	1.046	2.31792	9.876
10.6098	1.059	2.32303	9.876
10.6473	1.071	2.38824	9.876
10.6848	1.084	2.37162	9.876
10.7223	1.023	2.37034	9.877
10.7598	0.938	2.59024	9.878
10.7973	0.909	2.78074	9.874
10.8348	0.952	2.82165	9.872
10.8723	0.974	2.90859	9.874
10.9098	0.967	3.14511	9.887
10.9473	0.968	3.06328	9.9
10.9848	0.978	2.89324	9.912
11.0222	0.982	2.81014	9.92
11.0597	1.004	2.78201	9.927
11.0972	1.018	2.77306	9.93
11.1347	1.03	2.75005	9.931
11.1722	1.049	2.71553	9.934
11.2097	1.055	2.68613	9.936
11.2472	1.082	2.67462	9.94
11.2847	1.09	2.658	9.942
11.3222	1.095	2.65289	9.946
11.3597	1.094	2.66439	9.949
11.3972	1.107	2.67206	9.951
11.4346	1.12	2.68101	9.951
11.4721	1.117	2.69252	9.954
11.5096	1.108	2.70786	9.955
11.5471	1.097	2.71937	9.956
11.5846	1.095	2.71937	9.957
11.6221	1.092	2.71042	9.959
11.6596	1.094	2.70658	9.962
11.6971	1.174	2.7053	9.929
11.7346	1.187	2.7117	9.975
11.7721	1.184	2.70914	10.018
11.8095	1.182	2.71425	10.033
11.847	1.184	2.7296	10.038
11.8845	1.185	2.72065	10.033
11.922	1.198	2.72192	10.024
11.9595	1.237	2.73982	10.016
11.997	1.302	2.73982	10.011
12.0345	1.34	2.75133	10.009
12.072	1.304	2.76795	10.008
12.1095	1.297	2.77818	10.009
12.147	1.302	2.76923	10.01
12.1845	1.316	2.78713	10.01
12.2219	1.324	2.79736	10.007
12.2594	1.328	2.81525	10.006
12.2969	1.34	2.8242	10.004
12.3344	1.353	2.83443	10.002
12.3719	1.355	2.83827	10.001
12.4094	1.365	2.84082	9.999
12.4469	1.381	2.85233	9.998
12.4844	1.384	2.84466	9.997
12.5219	1.394	2.84082	9.997
12.5594	1.406	2.85361	9.997
12.5969	1.415	2.84594	9.997
12.6343	1.417	2.83827	9.997
12.6718	1.423	2.84466	9.998
12.7093	1.409	2.86384	9.999
12.7468	1.406	2.86895	10
12.7843	1.407	2.88046	10
12.8218	1.406	2.88685	9.999
12.8593	1.404	2.89836	9.998
12.8968	1.406	2.90603	9.997
12.9343	1.399	2.90986	9.996
12.9718	1.41	2.90347	9.994
13.0092	1.41	2.89708	9.993
13.0467	1.405	2.91498	9.995
13.0842	1.419	2.90603	9.996
13.1217	1.415	2.91242	9.996
13.1592	1.402	2.89324	9.997
13.1967	1.418	2.84977	9.999
13.2342	1.42	2.82548	9.999
13.2717	1.42	2.80503	9.999
13.3092	1.422	2.79608	9.999
13.3467	1.422	2.78457	10
13.3842	1.425	2.79736	9.999
13.4216	1.423	2.78201	10
13.4591	1.425	2.79352	10.001
13.4966	1.433	2.78713	10.001
13.5341	1.434	2.78713	10.001
13.5716	1.439	2.77434	10.001
13.6091	1.437	2.77434	10
13.6466	1.442	2.76156	10
13.6841	1.437	2.76156	10
13.7216	1.449	2.76156	10
13.7591	1.447	2.74877	10
13.7966	1.447	2.74877	9.999
13.834	1.449	2.73599	9.999
13.8715	1.453	2.73599	9.997
13.909	1.454	2.7232	9.996
13.9465	1.462	2.7232	9.995
13.984	1.47	2.71042	9.994
14.0215	1.47	2.69763	9.994
14.059	1.47	2.68485	9.994
14.0965	1.479	2.68485	9.993
14.134	1.475	2.67206	9.992
14.1715	1.472	2.67206	9.99
14.2089	1.482	2.68485	9.988
14.2464	1.482	2.68485	9.986
14.2839	1.49	2.69763	9.986
14.3214	1.494	2.69763	9.984
14.3589	1.494	2.71042	9.982
14.3964	1.491	2.7232	9.979
14.4339	1.501	2.7232	9.978
14.4714	1.505	2.7232	9.978
14.5089	1.507	2.73599	9.976
14.5464	1.503	2.74877	9.975
14.5839	1.508	2.74877	9.974
14.6213	1.513	2.76156	9.973
14.6588	1.509	2.76156	9.972
14.6963	1.515	2.77434	9.97
14.7338	1.519	2.77434	9.968
14.7713	1.515	2.78713	9.967
14.8088	1.527	2.78713	9.967
14.8463	1.528	2.79991	9.965
14.8838	1.49	2.79991	9.965
14.9213	1.5	2.8127	9.964
14.9588	1.5	2.82548	9.963
14.9963	1.5	2.83827	9.963
15.0337	1.5	2.8485	9.964
15.0712	1.5	2.85745	9.965
15.1087	1.5	2.83827	9.967
15.1462	1.51	2.83827	9.97
15.1837	1.51	2.85105	9.971
15.2212	1.51	2.86384	9.972
15.2587	1.51	2.85105	9.972
15.2962	1.51	2.83827	9.974
15.3337	1.52	2.86384	9.977
15.3712	1.52	2.86384	9.979
15.4086	1.52	2.86384	9.983
15.4461	1.53	2.85105	9.987
15.4836	1.53	2.85105	9.992
15.5211	1.53	2.86384	9.995
15.5586	1.53	2.85105	9.999
15.5961	1.54	2.83827	10.003
15.6336	1.54	2.83827	10.009
15.6711	1.54	2.85105	10.014
15.7086	1.55	2.86384	10.022
15.7461	1.55	2.83827	10.03
15.7836	1.55	2.86384	10.038
15.821	1.55	2.85105	10.046
15.8585	1.55	2.86384	10.056
15.896	1.56	2.87662	10.065
15.9335	1.56	2.88941	10.076
15.971	1.56	2.87662	10.085
16.0085	1.57	2.86384	10.097
16.046	1.57	2.86384	10.108
16.0835	1.57	2.87662	10.121
16.121	1.58	2.86384	10.132
16.1585	1.59	2.85105	10.146
16.196	1.61	2.8485	10.16
16.2334	1.61	2.85745	10.177
16.2709	1.62	2.86	10.191
16.3084	1.62	2.88302	10.207
16.3459	1.62	2.89069	10.223
16.3834	1.63	2.90475	10.242
16.4209	1.63	2.91114	10.258
16.4584	1.64	2.93416	10.276
16.4959	1.64	2.89708	10.293
16.5334	1.64	2.91498	10.314
16.5709	1.65	2.90603	10.332
16.6083	1.65	2.91242	10.354
16.6458	1.65	2.89324	10.374
16.6833	1.65	2.84977	10.397
16.7208	1.65	2.82548	10.416
16.7583	1.66	2.80503	10.44
16.7958	1.66	2.79608	10.462
16.8333	1.66	2.78457	10.489
16.8708	1.66	2.79736	10.511
16.9083	1.67	2.78201	10.536
16.9458	1.67	2.79352	10.559
16.9833	1.67	2.7769	10.585
17.0207	1.68	2.78457	10.61
17.0582	1.68	2.79608	10.638
17.0957	1.69	2.79863	10.664
17.1332	1.7	2.80247	10.695
17.1707	1.7	2.80375	10.72
17.2082	1.71	2.81909	10.75
17.2457	1.72	2.82165	10.778
17.2832	1.73	2.83188	10.811
17.3207	1.73	2.84338	10.838
17.3582	1.74	2.8485	10.869
17.3957	1.76	2.85745	10.897
17.4331	1.77	2.86	10.931
17.4706	1.77	2.88302	10.959
17.5081	1.77	2.89069	10.995
17.5456	1.78	2.88941	11.027
17.5831	1.78	2.86384	11.065
17.6206	1.79	2.87662	11.095
17.6581	1.8	2.87662	11.13
17.6956	1.83	2.86384	11.162
17.7331	1.86	2.87662	11.202
17.7706	1.88	2.87662	11.237
17.808	1.9	2.86384	11.276
17.8455	1.92	2.86384	11.311
17.883	1.94	2.87662	11.35
17.9205	1.97	2.88941	11.384
17.958	2	2.87662	11.426
17.9955	2.02	2.88941	11.464
18.033	2.05	2.88941	11.506
18.0705	2.07	2.88941	11.543
18.108	2.08	2.87662	11.584
18.1455	2.1	2.86384	11.622
18.183	2.11	2.87662	11.667
18.2204	2.13	2.86384	11.704
18.2579	2.14	2.87662	11.747
18.2954	2.15	2.86384	11.784
18.3329	2.15	2.86384	11.833
18.3704	2.15	2.85105	11.873
18.4079	2.17	2.87662	11.92
18.4454	2.19	2.87662	11.962
18.4829	2.2	2.87662	12.009
18.5204	2.21	2.8485	12.051
18.5579	2.22	2.85745	12.098
18.5954	2.23	2.86	12.14
18.6328	2.25	2.88302	12.19
18.6703	2.26	2.89069	12.235
18.7078	2.27	2.90475	12.282
18.7453	2.29	2.91114	12.328
18.7828	2.3	2.93416	12.375
18.8203	2.31	2.95333	12.419
18.8578	2.33	2.96612	12.472
18.8953	2.35	2.9789	12.519
18.9328	2.37	2.99169	12.569
18.9703	2.39	3.00447	12.616
19.0077	2.41	3.00447	12.667
19.0452	2.43	3.01726	12.713
19.0827	2.45	3.01726	12.763
19.1202	2.47	3.01726	12.81
19.1577	2.49	3.03004	12.864
19.1952	2.51	3.03004	12.916
19.2327	2.53	3.03004	12.972
19.2702	2.55	3.04283	13.022
19.3077	2.57	3.04283	13.079
19.3452	2.59	3.04283	13.13
19.3827	2.61	3.05561	13.182
19.4201	2.63	3.0684	13.229
19.4576	2.65	3.10675	13.289
19.4951	2.73	3.11954	13.341
19.5326	2.9	3.17068	13.398
19.5701	3.21	3.19625	13.447
19.6076	3.3	3.20903	13.503
19.6451	3.4	3.22182	13.553
19.6826	3.5	3.26017	13.608
19.7201	3.6	3.3241	13.66
19.7576	3.7	3.38802	13.721
19.7951	3.8	3.46473	13.774
19.8325	3.9	3.50309	13.831
19.87	4.1	3.51587	13.884
19.9075	4.21	3.51587	13.941
19.945	4.32	3.52866	13.995
19.9825	4.41	3.55423	14.052
20.02	4.5	3.5798	14.104
20.0575	4.55	3.70765	14.164
20.095	4.65	3.96335	14.221
20.1325	4.73	4.0912	14.28
20.17	4.85	4.21905	14.33
20.2074	4.95	4.28297	14.391
20.2449	5.09	4.30854	14.444
20.2824	5.19	4.36607	14.5
20.3199	5.33	4.38397	14.553
20.3574	5.53	4.41849	14.615
20.3949	5.6	4.4658	14.673
20.4324	5.8	4.52716	14.731
20.4699	5.98	4.58214	14.787
20.5074	6.16	4.68442	14.85
20.5449	6.3	4.80971	14.908
20.5824	6.53	4.96058	14.965
20.6198	6.8	5.13189	15.019
20.6573	6.9	5.34924	15.083
20.6948	7.1	5.58704	15.143
20.7323	7.3	5.83635	15.203
20.7698	7.61	6.13424	15.256
20.8073	7.8	6.41551	15.319
20.8448	8	6.74025	15.376
20.8823	8.13	7.05987	15.434
20.9198	8.26	7.38589	15.486
20.9573	8.32	7.70679	15.55
20.9948	8.4	7.99445	15.608
21.0322	8.57	8.28084	15.672
21.0697	8.72	8.51097	15.728
21.1072	8.84	8.72703	15.793
21.1447	8.87	8.86	15.849
21.1822	8.9	8.98913	15.905
21.2197	8.91	9.02748	15.961
21.2572	8.86	9.00703	16.029
21.2947	8.84	8.96611	16.092
21.3322	8.738	8.86256	16.155
21.3697	8.575	8.71041	16.211
21.4071	8.428	8.53142	16.275
21.4446	8.284	8.2834	16.331
21.4821	8.111	8.04815	16.391
21.5196	7.937	7.78094	16.451
21.5571	7.742	7.49712	16.513
21.5946	7.58	7.22096	16.575
21.6321	7.363	6.9512	16.639
21.6696	7.161	6.67632	16.693
21.7071	6.957	6.42062	16.762
21.7446	6.768	6.18154	16.82
21.7821	6.555	5.9642	16.882
21.8195	6.357	5.76347	16.937
21.857	6.155	5.61645	17.005
21.8945	5.987	5.45152	17.068
21.932	5.809	5.30961	17.129
21.9695	5.662	5.19454	17.19
22.007	5.518	5.08331	17.255
22.0445	5.368	5.00277	17.314
22.082	5.234	4.91711	17.373
22.1195	5.104	4.8583	17.434
22.157	4.972	4.81611	17.496
22.1945	4.878	4.75602	17.56
22.2319	4.762	4.70999	17.623
22.2694	4.671	4.66652	17.684
22.3069	4.55	4.62561	17.746
22.3444	4.44	4.56424	17.807
22.3819	4.33	4.52589	17.865
22.4194	4.22	4.48881	17.927
22.4569	4.11	4.43383	17.992
22.4944	4	4.38781	18.056
22.5319	3.9	4.34178	18.117
22.5694	3.8	4.28425	18.174
22.6068	3.73	4.21905	18.236
22.6443	3.65	4.15512	18.295
22.6818	3.6	4.10654	18.35
22.7193	3.55	4.04901	18.407
22.7568	3.51	4.0017	18.468
22.7943	3.47	3.94417	18.531
22.8318	3.4	3.89942	18.595
22.8693	3.35	3.83294	18.653
22.9068	3.3	3.77924	18.717
22.9443	3.25	3.74217	18.779
22.9818	3.2	3.68847	18.84
23.0192	3.18	3.64244	18.9
23.0567	3.15	3.59514	18.963
23.0942	3.1	3.56701	19.027
23.1317	3.04	3.51204	19.086
23.1692	3	3.48391	19.148
23.2067	2.97	3.45323	19.211
23.2442	2.93	3.4251	19.27
23.2817	2.9	3.38419	19.33
23.3192	2.84	3.34455	19.39
23.3567	2.8	3.30748	19.456
23.3942	2.75	3.28446	19.52
23.4316	2.72	3.25378	19.584
23.4691	2.7	3.20136	19.646
23.5066	2.68	3.16045	19.709
23.5441	2.6	3.12977	19.772
23.5816	2.55	3.08118	19.834
23.6191	2.53	3.0505	19.895
23.6566	2.54	3.01726	19.956
23.6941	2.52	2.98402	20.018
23.7316	2.5	2.96356	20.08
23.7691	2.48	2.94055	20.14
23.8065	2.47	2.94694	20.201
23.844	2.46	2.93799	20.259
23.8815	2.45	2.91626	20.318
23.919	2.44	2.91114	20.38
23.9565	2.43	2.89452	20.448
23.994	2.41	2.87023	20.517
24.0315	2.4	2.86128	20.581
24.069	2.38	2.85105	20.64
24.1065	2.36	2.8421	20.701
24.144	2.34	2.84466	20.759
24.1815	2.32	2.82804	20.816
24.2189	2.3	2.81525	20.878
24.2564	2.28	2.80758	20.943
24.2939	2.26	2.78457	21.009
24.3314	2.25	2.77306	21.072
24.3689	2.24	2.759	21.131
24.4064	2.23	2.73215	21.189
24.4439	2.22	2.70658	21.251
24.4814	2.21	2.69763	21.314
24.5189	2.2	2.68485	21.375
24.5564	2.19	2.68996	21.441
24.5939	2.15	2.68485	21.506
24.6313	2.142	2.6938	21.567
24.6688	2.108	2.69763	21.625
24.7063	2.076	2.69763	21.685
24.7438	2.046	2.68485	21.746
24.7813	2.01	2.68485	21.806
24.8188	1.988	2.69763	21.863
24.8563	1.949	2.69763	21.929
24.8938	1.93	2.68485	21.995
24.9313	1.899	2.69763	22.055
24.9688	1.872	2.7232	22.116
25.0062	1.862	2.68485	22.178
25.0437	1.842	2.68485	22.24
25.0812	1.811	2.69763	22.301
25.1187	1.794	2.69763	22.361
25.1562	1.781	2.69763	22.425
25.1937	1.765	2.69763	22.49
25.2312	1.747	2.69763	22.548
25.2687	1.73	2.7232	22.606
25.3062	1.712	2.71042	22.667
25.3437	1.693	2.71042	22.729
25.3812	1.68	2.71042	22.79
25.4186	1.665	2.7232	22.852
25.4561	1.648	2.7232	22.915
25.4936	1.636	2.69763	22.977
25.5311	1.629	2.69763	23.035
25.5686	1.62	2.69763	23.089
25.6061	1.607	2.69763	23.15
25.6436	1.597	2.68485	23.21
25.6811	1.598	2.68485	23.272
25.7186	1.584	2.68485	23.334
25.7561	1.576	2.68485	23.397
25.7936	1.566	2.68485	23.459
25.831	1.552	2.68485	23.518
25.8685	1.553	2.69763	23.571
25.906	1.55	2.71042	23.626
25.9435	1.543	2.69763	23.684
25.981	1.529	2.69763	23.742
26.0185	1.523	2.69763	23.803
26.056	1.508	2.69763	23.869
26.0935	1.511	2.68485	23.93
26.131	1.504	2.68485	23.993
26.1685	1.504	2.68485	24.053
26.2059	1.503	2.68485	24.115
26.2434	1.489	2.69763	24.178
26.2809	1.495	2.68485	24.237
26.3184	1.493	2.7232	24.29
26.3559	1.492	2.71042	24.352
26.3934	1.486	2.69763	24.413
26.4309	1.5	2.69763	24.471
26.4684	1.494	2.7232	24.526
26.5059	1.501	2.7232	24.583
26.5434	1.515	2.73599	24.644
26.5809	1.514	2.74877	24.703
26.6183	1.538	2.73599	24.762
26.6558	1.529	2.73599	24.827
26.6933	1.523	2.74877	24.886
26.7308	1.508	2.74877	24.949
26.7683	1.5	2.76156	25.008
26.8058	1.489	2.76156	25.068
26.8433	1.491	2.76156	25.128
26.8808	1.487	2.74877	25.185
26.9183	1.49	2.74877	25.24
26.9558	1.49	2.76156	25.303
26.9933	1.488	2.74877	25.366
27.0307	1.495	2.74877	25.428
27.0682	1.504	2.76156	25.487
27.1057	1.507	2.76156	25.548
27.1432	1.515	2.76156	25.607
27.1807	1.526	2.76156	25.665
27.2182	1.525	2.74877	25.72
27.2557	1.53	2.74877	25.785
27.2932	1.532	2.73599	25.847
27.3307	1.551	2.73599	25.911
27.3682	1.555	2.73599	25.971
27.4056	1.56	2.73599	26.035
27.4431	1.573	2.73599	26.09
27.4806	1.579	2.7232	26.147
27.5181	1.582	2.73599	26.205
27.5556	1.576	2.7232	26.271
27.5931	1.578	2.71042	26.333
27.6306	1.59	2.69763	26.395
27.6681	1.589	2.68485	26.45
27.7056	1.59	2.68485	26.512																				2.1
27.7431	1.59	2.68485	26.569																				2.1
27.7806	1.59	2.68485	26.629																				2.1
27.818	1.6	2.69763	26.683																				2.11
27.8555	1.63	2.73599	26.746																				2.14
27.893	1.62	2.7232	26.801																				2.13
27.9305	1.63	2.73599	26.865																				2.14
27.968	1.62	2.7232	26.92																				2.13
28.0055	1.61	2.71042	26.983																				2.12
28.043	1.6	2.69763	27.042																				2.11
28.0805	1.59	2.68485	27.1																				2.1
28.118	1.59	2.68485	27.156																				2.1
28.1555	1.61	2.71042	27.216																				2.12
28.193	1.61	2.71042	27.272																				2.12
28.2304	1.6	2.69763	27.332																				2.11
28.2679	1.59	2.68485	27.383																				2.1
28.3054	1.59	2.68485	27.442																				2.1
28.3429	1.6	2.69763	27.501																				2.11
28.3804	1.61	2.71042	27.562																				2.12
28.4179	1.62	2.7232	27.618																				2.13
28.4554	1.63	2.73599	27.68																				2.14
28.4929	1.64	2.74877	27.735																				2.15
28.5304	1.64	2.74877	27.796																				2.15
28.5679	1.64	2.74877	27.848																				2.15
28.6053	1.63	2.73599	27.909																				2.14
28.6428	1.62	2.7232	27.96																				2.13
28.6803	1.61	2.71042	28.02																				2.12
28.7178	1.6	2.69763	28.074																				2.11
28.7553	1.6	2.69763	28.141																				2.11
28.7928	1.59	2.68485	28.198																				2.1
28.8303	1.59	2.68485	28.261																				2.1
28.8678	1.62	2.7232	28.318																				2.13
28.9053	1.603	2.70147	28.378																				2.113
28.9428	1.61	2.71042	28.432																				2.12
28.9803	1.6	2.69763	28.492																				2.11
29.0177	1.6	2.69763	28.544																				2.11
29.0552	1.59	2.68485	28.6																				2.1
29.0927	1.59	2.68485	28.653																				2.1
29.1302	1.62	2.7232	28.714																				2.13
29.1677	1.603	2.70147	28.767																				2.113
29.2052	1.59	2.68485	28.829																				2.1
29.2427	1.6	2.69763	28.889																				2.11
29.2802	1.6	2.69763	28.95																				2.11
29.3177	1.6	2.69763	29.003																				2.11
29.3552	1.59	2.68485	29.07																				2.1
29.3927	1.59	2.68485	29.124																				2.1
29.4301	1.6	2.69763	29.184																				2.11
29.4676	1.6	2.69763	29.233																				2.11
29.5051	1.59	2.68485	29.295																				2.1
29.5426	1.59	2.68485	29.35																				2.1
29.5801	1.6	2.69763	29.411																				2.11
29.6176	1.6	2.69763	29.466																				2.11
29.6551	1.6	2.69763	29.529																				2.11
29.6926	1.59	2.68485	29.587																				2.1
29.7301	1.59	2.68485	29.648																				2.1
29.7676	1.6	2.69763	29.697																				2.11
29.805	1.6	2.69763	29.757																				2.11
29.8425	1.59	2.68485	29.811																				2.1
29.88	1.62	2.7232	29.871																				2.13
29.9175	1.6	2.69763	29.926																				2.11
29.955	1.61	2.71042	29.99																				2.12
29.9925	1.59	2.68485	30.045																				2.1
30.03	1.59	2.68485	30.106																				2.1
30.0675	1.59	2.68485	30.16																				2.1
30.105	1.6	2.69763	30.223																				2.11
30.1425	1.59	2.68485	30.276																				2.1
30.18	1.6	2.69763	30.339																				2.11
30.2174	1.6	2.69763	30.391																				2.11
30.2549	1.59	2.68485	30.452																				2.1
30.2924	1.63	2.73599	30.506																				2.14
30.3299	1.62	2.7232	30.568																				2.13
30.3674	1.61	2.71042	30.624																				2.12
30.4049	1.6	2.69763	30.688																				2.11
30.4424	1.59	2.68485	30.743																				2.1
30.4799	1.59	2.68485	30.801																				2.1
30.5174	1.6	2.69763	30.856																				2.11
30.5549	1.6	2.69763	30.917																				2.11
30.5924	1.59	2.68485	30.973																				2.1
30.6298	1.59	2.68485	31.031																				2.1
30.6673	1.6	2.69763	31.081																				2.11
30.7048	1.6	2.69763	31.14																				2.11
30.7423	1.6	2.69763	31.196																				2.11
30.7798	1.6	2.69763	31.261																				2.11
30.8173	1.61	2.71042	31.318																				2.12
30.8548	1.61	2.71042	31.384																				2.12
30.8923	1.599	2.69635	31.439																				2.109
30.9298	1.595	2.69124	31.502																				2.105
30.9673	1.598	2.69508	31.549																				2.108
31.0047	1.618	2.72065	31.609																				2.128
31.0422	1.613	2.71425	31.66																				2.123
31.0797	1.617	2.71937	31.719																				2.127
31.1172	1.62	2.7232	31.774																				2.13
31.1547	1.625	2.7296	31.834																				2.135
31.1922	1.629	2.73471	31.889																				2.139
31.2297	1.629	2.73471	31.951																				2.139
31.2672	1.632	2.73854	32.003																				2.142
31.3047	1.648	2.759	32.063																				2.158
31.3422	1.649	2.76028	32.114																				2.159
31.3797	1.64	2.759	32.173																				2.158
31.4171	1.64	2.76667	32.229																				2.164
31.4546	1.65	2.76795	32.296																				2.165
31.4921	1.64	2.77818	32.354																				2.173
31.5296	1.64	2.78457	32.417																				2.178
31.5671	1.65	2.78968	32.467																				2.182
31.6046	1.64	2.79608	32.528																				2.187
31.6421	1.65	2.80758	32.58																				2.196
31.6796	1.64	2.80503	32.643																				2.194
31.7171	1.64	2.81398	32.693																				2.201
31.7546	1.65	2.83188	32.757																				2.215
31.7921	1.64	2.82804	32.815																				2.212
31.8295	1.64	2.85361	32.876																				2.232
31.867	1.64	2.85872	32.93																				2.236
31.9045	1.64	2.86512	32.99																				2.241
31.942	1.64	2.86895	33.042																				2.244
31.9795	1.65	2.88685	33.1																				2.258
32.017	1.65	2.88046	33.154																				2.253
32.0545	1.66	2.88941	33.216																				2.26
32.092	1.756	2.89708	33.269																				2.266
32.1295	1.765	2.90859	33.331																				2.275
32.167	1.769	2.9137	33.384																				2.279
32.2044	1.777	2.92393	33.442																				2.287
32.2419	1.787	2.93671	33.494																				2.297
32.2794	1.796	2.94822	33.555																				2.306
32.3169	1.802	2.95589	33.608																				2.312
32.3544	1.805	2.95973	33.673																				2.315
32.3919	1.807	2.96228	33.726																				2.317
32.4294	1.813	2.96995	33.787																				2.323
32.4669	1.826	2.98657	33.838																				2.336
32.5044	1.823	2.98274	33.9																				2.333
32.5419	1.83	2.99169	33.953																				2.34
32.5794	1.842	3.00703	34.011																				2.352
32.6168	1.851	3.01854	34.063																				2.361
32.6543	1.852	3.01981	34.125																				2.362
32.6918	1.87	3.04283	34.182																				2.38
32.7293	1.874	3.04794	34.242																				2.384
32.7668	1.882	3.05817	34.296																				2.392
32.8043	1.894	3.07351	34.358																				2.404
32.8418	1.897	3.07735	34.417																				2.407
32.8793	1.899	3.0799	34.478																				2.409
32.9168	1.909	3.09269	34.532																				2.419
32.9543	1.91	3.09397	34.594																				2.42
32.9918	1.928	3.11698	34.648																				2.438
33.0292	1.934	3.12465	34.704																				2.444
33.0667	1.944	3.13744	34.754																				2.454
33.1042	1.94	3.13232	34.819																				2.45
33.1417	1.954	3.15022	34.872																				2.464
33.1792	1.964	3.16301	34.934																				2.474
33.2167	1.958	3.15534	34.988																				2.468
33.2542	1.966	3.16556	35.052																				2.476
33.2917	1.969	3.1694	35.102																				2.479
33.3292	1.974	3.17579	35.157																				2.484
33.3667	1.976	3.17835	35.209																				2.486
33.4041	1.988	3.19369	35.269																				2.498
33.4416	2.007	3.21798	35.328																				2.517
33.4791	1.84	3.00447	35.389																				2.35
33.5166	1.812	2.96867	35.44																				2.322
33.5541	2.007	3.21798	35.501																				2.517
33.5916	2.007	3.21798	35.557																				2.517
33.6291	2.015	3.22821	35.612																				2.525
33.6666	2.024	3.23972	35.668																				2.534
33.7041	2.021	3.23588	35.723																				2.531
33.7416	1.993	3.20008	35.775																				2.503
33.7791	1.877	3.05178	35.835																				2.387
33.8165	-0.51	0	35.894
33.854	-0.51	0	35.953
33.8915	-0.51	0	35.998
33.929	-0.51	0	36.054
33.9665	-0.51	0	36.105
34.004	-0.51	0	36.166
34.0415	-0.51	0	36.215
34.079	-0.51	0	36.273
34.1165	-0.51	0	36.329
34.154	-0.51	0	36.391
34.1915	-0.51	0	36.437
34.2289	-0.51	0	36.486
34.2664	-0.51	0	36.536
34.3039	-0.51	0	36.592
34.3414	-0.51	0	36.643
34.3789	-0.51	0	36.704
34.4164	-0.51	0	36.757
34.4539	-0.51	0	36.811
34.4914	-0.51	0	36.863
34.5289	-0.51	0	36.92
34.5664	-0.51	0	36.974
34.6038	-0.51	0	37.027
34.6413	-0.51	0	37.081
34.6788	-0.51	0	37.137
34.7163	-0.51	0	37.187
34.7538	-0.51	0	37.24
34.7913	-0.51	0	37.289
34.8288	-0.51	0	37.342
34.8663	-0.51	0	37.392
34.9038	-0.51	0	37.446
34.9413	-0.51	0	37.498
34.9788	-0.51	0	37.55
35.0162	-0.51	0	37.598
35.0537	-0.51	0	37.649
35.0912	-0.51	0	37.693
35.1287	-0.51	0	37.741
35.1662	-0.51	0	37.786
35.2037	-0.51	0	37.837
35.2412	-0.51	0	37.89
35.2787	-0.51	0	37.945
35.3162	-0.51	0	37.995
35.3537		0	38.052
35.3912		0	38.102
35.4286		0	38.145
35.4661		0	38.191
35.5036		0	38.241
35.5411		0	38.289
35.5786		0	38.338
35.6161		0	38.384
35.6536		0	38.435
35.6911		0	38.481
		0

## Sheet: Ric8a
	unP-Ric8a452	P-Ric8a452
Volume (ml)	A280 (mAU)	A280 (mAU)	Conductivity (mS/cm)
0	15.454	4.583	9.461
0.0374924	15.295	4.545	9.485
0.0749849	15.022	4.383	9.592
0.112477	14.865	4.285	9.647
0.14997	14.774	4.293	9.688
0.187462	14.689	4.246	9.711
0.224955	14.663	4.188	9.705
0.262447	14.676	4.244	9.693
0.299939	14.69	4.28	9.682
0.337432	14.65	4.251	9.684
0.374924	14.674	4.259	9.692
0.412417	14.753	4.244	9.696
0.449909	14.788	4.173	9.697
0.487402	14.851	4.166	9.695
0.524894	14.912	4.197	9.692
0.562387	14.947	4.191	9.694
0.599879	14.958	4.174	9.696
0.637371	14.926	4.184	9.699
0.674864	14.98	4.159	9.704
0.712356	15.034	4.222	9.706
0.749849	15.065	4.29	9.709
0.787341	15.093	4.321	9.711
0.824834	15.193	4.315	9.711
0.862326	15.234	4.309	9.716
0.899818	15.253	4.293	9.722
0.937311	-0.002	4.293	9.729
0.974803	0.038	4.279	9.737
1.0123	0.179	1.517	9.537
1.04979	0.234	1.506	9.555
1.08728	0.245	1.575	9.687
1.12477	0.383	1.597	9.76
1.16227	0.457	1.551	9.798
1.19976	0.538	1.424	9.82
1.23725	0.598	1.55	9.824
1.27474	0.66	1.646	9.811
1.31224	0.724	1.645	9.786
1.34973	0.786	1.656	9.768
1.38722	0.866	1.674	9.749
1.42471	0.945	1.672	9.736
1.46221	1.009	1.684	9.726
1.4997	1.057	1.696	9.719
1.53719	1.102	1.705	9.711
1.57468	1.148	1.72	9.703
1.61217	1.197	1.725	9.696
1.64967	1.249	1.728	9.69
1.68716	1.291	1.742	9.685
1.72465	1.341	1.75	9.682
1.76214	1.384	1.758	9.682
1.79964	1.422	1.763	9.681
1.83713	1.452	1.769	9.68
1.87462	1.443	1.774	9.678
1.91211	1.314	1.783	9.675
1.94961	0.877	1.79	9.672
1.9871	0.075	1.784	9.669
2.02459	-1.076	1.787	9.669
2.06208	-2.208	1.78	9.67
2.09958	-3.303	1.763	9.671
2.13707	-4.126	1.738	9.674
2.17456	-4.745	1.682	9.681
2.21205	-5.246	1.548	9.695
2.24955	-5.618	1.399	9.717
2.28704	-5.879	1.224	9.744
2.32453	-6.089	1.07	9.776
2.36202	-6.224	0.952	9.813
2.39952	-6.314	0.885	9.849
2.43701	-6.371	0.823	9.881
2.4745	-6.403	0.758	9.908
2.51199	-6.42	0.694	9.933
2.54949	-6.423	0.64	9.956
2.58698	-6.422	0.632	9.976
2.62447	-6.427	0.633	9.993
2.66196	-6.403	0.637	10.007
2.69946	-6.391	0.653	10.016
2.73695	-6.377	0.684	10.023
2.77444	-6.354	0.729	10.028
2.81193	-6.33	0.744	10.031
2.84943	-6.291	0.772	10.033
2.88692	-6.253	0.808	10.031
2.92441	-6.205	0.845	10.031
2.9619	-6.146	0.878	10.029
2.99939	-6.078	0.903	10.028
3.03689	-6.021	0.946	10.027
3.07438	-5.957	0.971	10.026
3.11187	-5.899	1.011	10.023
3.14936	-5.84	1.012	10.02
3.18686	-5.785	1.042	10.018
3.22435	-5.721	1.091	10.017
3.26184	-5.673	1.125	10.017
3.29933	-5.606	1.161	10.015
3.33683	-5.563	1.2	10.013
3.37432	-5.496	1.239	10.011
3.41181	-5.44	1.297	10.007
3.4493	-5.376	1.343	10.005
3.4868	-5.323	1.423	10.003
3.52429	-5.26	1.511	10.001
3.56178	-5.215	1.624	10
3.59927	-5.15	1.751	9.999
3.63677	-5.08	1.927	9.998
3.67426	-5.024	2.145	9.996
3.71175	-4.966	2.437	9.994
3.74924	-4.901	2.737	9.992
3.78674	-4.842	3.13	9.989
3.82423	-4.776	3.587	9.987
3.86172	-4.704	4.205	9.985
3.89921	-4.62	4.871	9.983
3.93671	-4.511	5.63	9.982
3.9742	-4.378	6.57	9.979
4.01169	-4.184	7.649	9.977
4.04918	-3.898	8.813	9.975
4.08668	-3.499	10.197	9.972
4.12417	-3.051	11.662	9.969
4.16166	-2.513	13.377	9.966
4.19915	-2.006	15.132	9.963
4.23665	-1.525	17.286	9.961
4.27414	-1.076	19.359	9.957
4.31163	-0.701	21.617	9.953
4.34912	-0.381	23.886	9.949
4.38662	-0.093	26.357	9.945
4.42411	0.174	28.76	9.941
4.4616	0.417	31.465	9.936
4.49909	0.653	33.961	9.932
4.53658	0.866	36.937	9.929
4.57408	1.025	39.648	9.925
4.61157	1.197	42.596	9.92
4.64906	1.329	45.226	9.915
4.68655	1.451	48.11	9.911
4.72405	1.57	50.808	9.907
4.76154	1.683	53.832	9.903
4.79903	1.766	56.478	9.899
4.83652	1.838	59.225	9.895
4.87402	1.919	61.165	9.89
4.91151	1.969	62.766	9.88
4.949	2.019	63.809	9.862
4.98649	2.061	64.466	9.834
5.02399	2.084	64.683	9.8
5.06148	2.115	64.504	9.764
5.09897	2.129	63.936	9.733
5.13646	2.142	62.98	9.702
5.17396	2.138	61.884	9.675
5.21145	2.149	60.733	9.651
5.24894	2.146	59.804	9.631
5.28643	2.146	59.082	9.614
5.32393	2.134	58.726	9.599
5.36142	2.134	58.716	9.586
5.39891	2.122	58.944	9.576
5.4364	2.128	59.433	9.567
5.4739	2.113	59.973	9.559
5.51139	2.105	60.622	9.552
5.54888	2.097	61.25	9.547
5.58637	2.08	61.959	9.542
5.62387	2.073	62.657	9.538
5.66136	2.073	63.408	9.535
5.69885	2.066	64.125	9.531
5.73634	2.059	64.968	9.528
5.77384	2.05	65.699	9.525
5.81133	2.036	66.518	9.521
5.84882	2.063	67.234	9.517
5.88631	2.043	68.005	9.515
5.92381	2.032	68.759	9.513
5.9613	2.034	69.583	9.51
5.99879	2.027	70.334	9.508
6.03628	2.034	71.222	9.506
6.07377	1.967	71.979	9.504
6.11127	2	72.825	9.5
6.14876	2.032	73.58	9.497
6.18625	2.033	74.378	9.495
6.22374	2.033	75.123	9.492
6.26124	1.947	75.943	9.489
6.29873	1.98	76.702	9.486
6.33622	2.019	77.543	9.484
6.37371	2.086	78.294	9.482
6.41121	2.052	79.068	9.481
6.4487	2.058	79.761	9.479
6.48619	2.051	80.472	9.478
6.52368	2.055	81.161	9.475
6.56118	2.06	81.863	9.473
6.59867	2.062	82.501	9.471
6.63616	2.073	83.192	9.468
6.67365	2.084	83.794	9.465
6.71115	2.097	84.397	9.462
6.74864	2.103	84.936	9.461
6.78613	2.111	85.496	9.459
6.82362	2.124	85.994	9.458
6.86112	2.124	86.49	9.456
6.89861	2.124	86.958	9.454
6.9361	2.098	87.454	9.454
6.97359	2.097	87.859	9.453
7.01109	2.115	88.295	9.452
7.04858	2.11	88.65	9.45
7.08607	2.13	89.031	9.449
7.12356	2.152	89.363	9.448
7.16106	2.167	89.695	9.447
7.19855	2.188	89.999	9.446
7.23604	2.222	90.309	9.446
7.27353	2.238	90.583	9.446
7.31103	2.268	90.85	9.444
7.34852	2.298	91.068	9.444
7.38601	2.312	91.301	9.443
7.4235	2.341	91.496	9.443
7.46099	2.37	91.678	9.442
7.49849	2.382	91.838	9.44
7.53598	2.406	91.985	9.439
7.57347	2.418	92.117	9.439
7.61096	2.439	92.245	9.438
7.64846	2.455	92.337	9.437
7.68595	2.468	92.419	9.437
7.72344	2.491	92.486	9.436
7.76093	2.506	92.537	9.436
7.79843	2.515	92.567	9.435
7.83592	2.524	92.593	9.434
7.87341	2.534	92.6	9.433
7.9109	2.551	92.601	9.432
7.9484	2.561	92.596	9.432
7.98589	2.573	92.583	9.431
8.02338	2.595	92.55	9.431
8.06087	2.605	92.522	9.43
8.09837	2.624	92.48	9.429
8.13586	2.635	92.421	9.429
8.17335	2.642	92.385	9.428
8.21084	2.652	92.344	9.428
8.24834	2.672	92.301	9.427
8.28583	2.683	92.237	9.426
8.32332	2.695	92.169	9.426
8.36081	2.703	92.103	9.425
8.39831	2.722	92.039	9.425
8.4358	2.732	91.965	9.425
8.47329	2.736	91.891	9.424
8.51078	2.759	91.809	9.423
8.54828	2.764	91.739	9.422
8.58577	2.776	91.638	9.421
8.62326	2.783	91.54	9.421
8.66075	2.799	91.445	9.42
8.69825	2.803	91.325	9.42
8.73574	2.823	91.21	9.42
8.77323	2.833	91.088	9.419
8.81072	2.831	90.948	9.418
8.84822	2.845	90.816	9.418
8.88571	2.853	90.646	9.417
8.9232	2.867	90.48	9.416
8.96069	2.869	90.292	9.416
8.99818	2.886	90.096	9.416
9.03568	2.889	89.907	9.416
9.07317	2.893	89.688	9.416
9.11066	2.909	89.455	9.416
9.14815	2.901	89.246	9.416
9.18565	2.91	89.012	9.415
9.22314	2.921	88.748	9.415
9.26063	2.942	88.455	9.414
9.29812	2.942	88.155	9.414
9.33562	2.952	87.853	9.414
9.37311	2.961	87.498	9.413
9.4106	2.976	87.159	9.413
9.44809	2.966	86.792	9.412
9.48559	2.807	86.357	9.412
9.52308	2.805	85.893	9.411
9.56057	2.898	85.347	9.411
9.59806	2.918	84.769	9.411
9.63556	2.922	84.121	9.41
9.67305	2.929	83.338	9.41
9.71054	2.936	82.512	9.41
9.74803	2.924	81.568	9.41
9.78553	2.932	80.447	9.41
9.82302	2.935	79.111	9.411
9.86051	2.943	77.445	9.41
9.898	2.95	75.698	9.411
9.9355	2.941	73.641	9.412
9.97299	2.974	71.187	9.413
10.0105	2.976	68.409	9.414
10.048	2.973	65.589	9.415
10.0855	2.978	62.131	9.415
10.123	2.983	58.414	9.416
10.1605	2.994	54.004	9.416
10.1979	2.998	49.707	9.418
10.2354	2.998	45.311	9.419
10.2729	3.005	40.633	9.422
10.3104	3.002	35.855	9.425
10.3479	3.002	31.748	9.427
10.3854	2.996	27.507	9.429
10.4229	2.996	23.547	9.431
10.4604	2.987	19.853	9.436
10.4979	2.969	16.956	9.453
10.5354	2.95	14.395	9.476
10.5729	2.951	11.947	9.497
10.6104	2.986	9.975	9.512
10.6479	3.014	8.535	9.523
10.6853	2.953	7.285	9.532
10.7228	2.955	6.193	9.539
10.7603	2.967	5.397	9.546
10.7978	3.168	4.767	9.554
10.8353	3.1	4.246	9.574
10.8728	3.087	3.801	9.596
10.9103	3.095	3.462	9.608
10.9478	3.09	3.221	9.611
10.9853	3.096	3.03	9.605
11.0228	3.099	2.855	9.6
11.0603	3.107	2.723	9.601
11.0978	3.111	2.618	9.601
11.1353	3.118	2.52	9.602
11.1727	3.115	2.446	9.604
11.2102	3.103	2.373	9.607
11.2477	3.116	2.327	9.611
11.2852	3.119	2.277	9.611
11.3227	3.124	2.24	9.614
11.3602	3.118	2.191	9.618
11.3977	3.099	2.168	9.621
11.4352	3.079	2.13	9.622
11.4727	3.071	2.112	9.624
11.5102	3.045	2.064	9.624
11.5477	3.03	2.046	9.625
11.5852	2.983	2.026	9.625
11.6227	2.914	2.016	9.627
11.6601	2.834	1.998	9.632
11.6976	2.772	2.026	9.532
11.7351	2.709	2.038	9.631
11.7726	2.657	2.041	9.685
11.8101	2.621	2.027	9.713
11.8476	2.584	2.009	9.735
11.8851	2.568	2.013	9.735
11.9226	2.546	2.017	9.72
11.9601	2.528	2.072	9.698
11.9976	2.522	2.096	9.684
12.0351	2.495	2.011	9.679
12.0726	2.496	1.947	9.677
12.1101	2.483	1.928	9.678
12.1475	2.473	2.058	9.679
12.185	2.458	2.065	9.677
12.2225	2.461	2.067	9.674
12.26	2.456	2.063	9.669
12.2975	2.452	2.065	9.664
12.335	2.448	2.062	9.657
12.3725	2.441	2.066	9.652
12.41	2.436	2.066	9.647
12.4475	2.433	2.06	9.643
12.485	2.418	2.079	9.639
12.5225	2.415	2.08	9.637
12.56	2.411	2.08	9.635
12.5975	2.413	2.076	9.635
12.635	2.407	2.071	9.635
12.6724	2.402	2.056	9.634
12.7099	2.394	2.038	9.633
12.7474	2.393	2.028	9.633
12.7849	2.384	2.035	9.631
12.8224	2.389	2.035	9.629
12.8599	2.383	2.029	9.626
12.8974	2.371	2.031	9.626
12.9349	2.377	2.036	9.626
12.9724	2.373	2.039	9.624
13.0099	2.359	2.03	9.623
13.0474	2.359	2.029	9.624
13.0849	2.35	2.038	9.625
13.1224	2.36	2.048	9.626
13.1598	2.359	2.049	9.629
13.1973	2.341	2.052	9.629
13.2348	2.337	2.061	9.629
13.2723	2.341	2.065	9.628
13.3098	2.338	2.059	9.628
13.3473	2.33	2.059	9.628
13.3848	2.328	2.072	9.627
13.4223	2.333	2.071	9.626
13.4598	2.317	2.071	9.625
13.4973	2.327	2.077	9.624
13.5348	2.315	2.078	9.624
13.5723	2.31	2.088	9.625
13.6098	2.322	2.096	9.624
13.6472	2.32	2.082	9.622
13.6847	2.315	2.084	9.623
13.7222	2.314	2.079	9.624
13.7597	2.309	2.078	9.623
13.7972	2.307	2.077	9.622
13.8347	2.299	2.076	9.621
13.8722	2.303	2.075	9.621
13.9097	2.311	2.073	9.621
13.9472	2.306	2.075	9.622
13.9847	2.314	2.067	9.621
14.0222	2.312	2.065	9.618
14.0597	2.309	2.056	9.615
14.0972	2.314	2.062	9.614
14.1346	2.32	2.06	9.613
14.1721	2.323	2.061	9.61
14.2096	2.323	2.053	9.609
14.2471	2.334	2.062	9.608
14.2846	2.333	2.062	9.607
14.3221	2.333	2.061	9.605
14.3596	2.338	2.066	9.6
14.3971	2.338	2.058	9.597
14.4346	2.36	2.054	9.598
14.4721	2.362	2.044	9.599
14.5096	2.366	2.054	9.599
14.5471	2.377	2.063	9.598
14.5846	2.374	2.071	9.597
14.6221	2.389	2.073	9.594
14.6595	2.397	2.046	9.593
14.697	2.4	2.05	9.593
14.7345	2.416	2.064	9.593
14.772	2.411	2.067	9.592
14.8095	2.435	2.061	9.591
14.847	2.44	2.065	9.59
14.8845	2.452	2.072	9.589
14.922	2.456	2.069	9.589
14.9595	2.471	2.069	9.589
14.997	2.478	2.061	9.589
15.0345	2.479	2.035	9.588
15.072	2.494	2.06	9.589
15.1095	2.507	2.074	9.591
15.1469	2.523	2.084	9.592
15.1844	2.536	2.066	9.594
15.2219	2.545	2.058	9.596
15.2594	2.561	2.075	9.599
15.2969	2.575	2.094	9.602
15.3344	2.574	2.108	9.604
15.3719	2.599	2.113	9.607
15.4094	2.614	2.095	9.612
15.4469	2.631	2.095	9.616
15.4844	2.642	2.111	9.621
15.5219	2.655	2.115	9.627
15.5594	2.667	2.114	9.635
15.5969	2.688	2.112	9.641
15.6343	2.712	2.127	9.648
15.6718	2.726	2.132	9.655
15.7093	2.734	2.135	9.663
15.7468	2.755	2.139	9.672
15.7843	2.77	2.149	9.682
15.8218	2.797	2.152	9.693
15.8593	2.812	2.143	9.707
15.8968	2.819	2.116	9.719
15.9343	2.846	2.135	9.733
15.9718	2.859	2.145	9.745
16.0093	2.884	2.139	9.76
16.0468	2.912	2.145	9.773
16.0843	2.928	2.175	9.792
16.1217	2.942	2.181	9.807
16.1592	2.959	2.188	9.825
16.1967	2.991	2.224	9.842
16.2342	3.012	2.231	9.863
16.2717	3.036	2.209	9.879
16.3092	3.058	2.211	9.899
16.3467	3.083	2.215	9.919
16.3842	3.098	2.224	9.941
16.4217	3.116	2.233	9.963
16.4592	3.148	2.244	9.987
16.4967	3.175	2.26	10.01
16.5342	3.193	2.275	10.035
16.5717	3.219	2.285	10.058
16.6091	3.254	2.283	10.085
16.6466	3.276	2.3	10.109
16.6841	3.3	2.32	10.137
16.7216	3.325	2.332	10.162
16.7591	3.348	2.348	10.191
16.7966	3.38	2.36	10.219
16.8341	3.404	2.368	10.249
16.8716	3.424	2.379	10.275
16.9091	3.459	2.398	10.306
16.9466	3.478	2.413	10.334
16.9841	3.509	2.435	10.367
17.0216	3.551	2.458	10.397
17.0591	3.568	2.48	10.431
17.0966	3.599	2.516	10.464
17.134	3.626	2.523	10.499
17.1715	3.653	2.548	10.532
17.209	3.691	2.553	10.566
17.2465	3.721	2.568	10.601
17.284	3.756	2.582	10.638
17.3215	3.782	2.603	10.675
17.359	3.809	2.624	10.713
17.3965	3.836	2.638	10.751
17.434	3.873	2.66	10.791
17.4715	3.905	2.674	10.829
17.509	3.937	2.689	10.868
17.5465	3.966	2.697	10.907
17.584	3.998	2.718	10.95
17.6214	4.036	2.743	10.989
17.6589	4.066	2.765	11.035
17.6964	4.098	2.786	11.075
17.7339	4.138	2.791	11.122
17.7714	4.164	2.836	11.162
17.8089	4.204	2.87	11.207
17.8464	4.243	2.879	11.251
17.8839	4.282	2.898	11.299
17.9214	4.329	2.914	11.343
17.9589	4.365	2.916	11.391
17.9964	4.411	2.924	11.438
18.0339	4.46	2.938	11.486
18.0714	4.509	2.959	11.532
18.1088	4.557	2.986	11.579
18.1463	4.635	3.003	11.629
18.1838	4.716	3.04	11.68
18.2213	4.807	3.071	11.731
18.2588	4.905	3.093	11.782
18.2963	5.036	3.113	11.834
18.3338	5.184	3.141	11.887
18.3713	5.377	3.162	11.937
18.4088	5.642	3.196	11.989
18.4463	5.949	3.227	12.043
18.4838	6.327	3.254	12.1
18.5213	6.82	3.273	12.152
18.5588	7.339	3.326	12.208
18.5962	8.061	3.381	12.264
18.6337	8.877	3.391	12.32
18.6712	9.796	3.424	12.374
18.7087	10.92	3.45	12.428
18.7462	12.179	3.483	12.486
18.7837	13.718	3.527	12.543
18.8212	15.138	3.564	12.601
18.8587	16.806	3.586	12.662
18.8962	18.503	3.604	12.722
18.9337	20.336	3.633	12.779
18.9712	22.295	3.649	12.834
19.0087	23.951	3.694	12.896
19.0462	25.843	3.723	12.958
19.0837	27.474	3.753	13.019
19.1211	28.85	3.779	13.079
19.1586	30.093	3.843	13.142
19.1961	31.062	3.919	13.205
19.2336	31.732	3.962	13.265
19.2711	32.139	3.989	13.324
19.3086	32.201	4.018	13.388
19.3461	31.988	4.058	13.453
19.3836	31.448	4.08	13.516
19.4211	30.65	4.104	13.58
19.4586	29.65	4.134	13.644
19.4961	28.364	4.179	13.709
19.5336	26.938	4.195	13.771
19.5711	25.468	4.222	13.833
19.6085	23.991	4.221	13.9
19.646	22.53	4.24	13.968
19.6835	21.021	4.255	14.033
19.721	19.503	4.267	14.096
19.7585	17.988	4.294	14.165
19.796	16.751	4.313	14.234
19.8335	15.536	4.335	14.297
19.871	14.467	4.363	14.362
19.9085	13.574	4.385	14.431
19.946	12.678	4.402	14.5
19.9835	11.927	4.426	14.568
20.021	11.271	4.44	14.636
20.0585	10.695	4.462	14.706
20.0959	10.202	4.489	14.775
20.1334	9.82	4.506	14.841
20.1709	9.49	4.538	14.907
20.2084	9.19	4.566	14.978
20.2459	8.98	4.591	15.048
20.2834	8.767	4.609	15.117
20.3209	8.607	4.643	15.186
20.3584	8.484	4.674	15.256
20.3959	8.37	4.692	15.326
20.4334	8.278	4.734	15.391
20.4709	8.213	4.774	15.454
20.5084	8.138	4.812	15.526
20.5459	8.082	4.848	15.598
20.5833	8.034	4.887	15.667
20.6208	7.999	4.924	15.736
20.6583	7.956	4.964	15.808
20.6958	7.928	5.002	15.879
20.7333	7.891	5.042	15.946
20.7708	7.875	5.075	16.013
20.8083	7.842	5.121	16.085
20.8458	7.813	5.155	16.159
20.8833	7.79	5.199	16.23
20.9208	7.765	5.239	16.301
20.9583	7.741	5.302	16.376
20.9958	7.716	5.324	16.45
21.0333	7.687	5.35	16.518
21.0707	7.667	5.378	16.587
21.1082	7.643	5.371	16.662
21.1457	7.623	5.403	16.736
21.1832	7.588	5.44	16.809
21.2207	7.57	5.455	16.878
21.2582	7.562	5.479	16.954
21.2957	7.542	5.498	17.027
21.3332	7.539	5.516	17.097
21.3707	7.529	5.539	17.168
21.4082	7.512	5.566	17.243
21.4457	7.511	5.581	17.317
21.4832	7.511	5.61	17.39
21.5207	7.507	5.647	17.463
21.5582	7.498	5.679	17.54
21.5956	7.498	5.699	17.614
21.6331	7.512	5.739	17.685
21.6706	7.517	5.779	17.756
21.7081	7.518	5.817	17.833
21.7456	7.53	5.869	17.909
21.7831	7.538	5.918	17.983
21.8206	7.537	5.967	18.056
21.8581	7.54	6.06	18.131
21.8956	7.559	6.172	18.205
21.9331	7.568	6.31	18.276
21.9706	7.578	6.452	18.345
22.0081	7.588	6.664	18.423
22.0456	7.609	6.917	18.499
22.083	7.608	7.242	18.572
22.1205	7.611	7.633	18.645
22.158	7.63	8.149	18.72
22.1955	7.635	8.697	18.795
22.233	7.643	9.399	18.867
22.2705	7.658	10.192	18.941
22.308	7.664	11.177	19.019
22.3455	7.677	12.314	19.097
22.383	7.685	13.546	19.172
22.4205	7.697	14.901	19.245
22.458	7.71	16.474	19.321
22.4955	7.712	17.91	19.396
22.533	7.725	19.572	19.47
22.5704	7.735	21.135	19.544
22.6079	7.753	22.883	19.62
22.6454	7.76	24.477	19.695
22.6829	7.771	26.01	19.769
22.7204	7.783	27.238	19.837
22.7579	7.791	28.445	19.913
22.7954	7.802	29.281	19.986
22.8329	7.808	30.049	20.057
22.8704	7.825	30.474	20.128
22.9079	7.831	30.754	20.204
22.9454	7.847	30.686	20.28
22.9829	7.864	30.32	20.356
23.0204	7.873	29.775	20.428
23.0578	7.886	28.955	20.505
23.0953	7.905	28.08	20.58
23.1328	7.911	27.012	20.652
23.1703	7.921	25.885	20.723
23.2078	7.94	24.487	20.802
23.2453	7.951	23.137	20.877
23.2828	7.966	21.758	20.954
23.3203	7.979	20.439	21.028
23.3578	8	19.083	21.107
23.3953	8.009	17.888	21.179
23.4328	8.029	16.717	21.25
23.4703	8.046	15.689	21.323
23.5078	8.064	14.625	21.4
23.5453	8.087	13.68	21.477
23.5827	8.106	12.865	21.553
23.6202	8.124	12.138	21.627
23.6577	8.139	11.472	21.702
23.6952	8.15	10.939	21.776
23.7327	8.171	10.476	21.851
23.7702	8.191	10.104	21.924
23.8077	8.203	9.716	22.004
23.8452	8.226	9.407	22.079
23.8827	8.25	9.134	22.158
23.9202	8.269	8.938	22.23
23.9577	8.283	8.756	22.308
23.9952	8.301	8.636	22.377
24.0327	8.327	8.54	22.45
24.0701	8.347	8.465	22.519
24.1076	8.369	8.377	22.599
24.1451	8.396	8.328	22.675
24.1826	8.411	8.278	22.755
24.2201	8.439	8.24	22.824
24.2576	8.458	8.204	22.904
24.2951	8.476	8.184	22.975
24.3326	8.495	8.164	23.054
24.3701	8.519	8.146	23.122
24.4076	8.544	8.141	23.202
24.4451	8.567	8.114	23.278
24.4826	8.583	8.089	23.355
24.5201	8.616	8.072	23.424
24.5575	8.635	8.066	23.503
24.595	8.661	8.062	23.573
24.6325	8.687	8.069	23.649
24.67	8.711	8.087	23.717
24.7075	8.741	8.103	23.793
24.745	8.752	8.103	23.869
24.7825	8.77	8.105	23.948
24.82	8.805	8.111	24.019
24.8575	8.825	8.118	24.095
24.895	8.86	8.128	24.163
24.9325	8.882	8.152	24.237
24.97	8.923	8.147	24.304
25.0075	8.945	8.151	24.386
25.0449	8.978	8.164	24.457
25.0824	9.016	8.174	24.538
25.1199	9.044	8.188	24.604
25.1574	9.091	8.216	24.683
25.1949	9.118	8.236	24.751
25.2324	9.16	8.255	24.828
25.2699	9.2	8.266	24.9
25.3074	9.233	8.292	24.982
25.3449	9.276	8.309	25.058
25.3824	9.33	8.311	25.136
25.4199	9.368	8.326	25.205
25.4574	9.397	8.376	25.283
25.4949	9.444	8.397	25.352
25.5323	9.491	8.419	25.429
25.5698	9.539	8.439	25.497
25.6073	9.602	8.457	25.576
25.6448	9.649	8.485	25.649
25.6823	9.719	8.508	25.728
25.7198	9.776	8.53	25.796
25.7573	9.829	8.557	25.879
25.7948	9.899	8.578	25.944
25.8323	9.968	8.608	26.021
25.8698	10.041	8.627	26.085
25.9073	10.116	8.658	26.167
25.9448	10.182	8.676	26.238
25.9823	10.278	8.699	26.316
26.0198	10.35	8.719	26.385
26.0572	10.431	8.751	26.463
26.0947	10.503	8.774	26.531
26.1322	10.593	8.787	26.607
26.1697	10.681	8.83	26.675
26.2072	10.753	8.85	26.752
26.2447	10.826	8.869	26.822
26.2822	10.885	8.9	26.899
26.3197	10.942	8.928	26.968
26.3572	10.996	8.95	27.043
26.3947	11.063	8.976	27.108
26.4322	11.118	9.006	27.182
26.4697	11.151	9.026	27.249
26.5072	11.189	9.059	27.332
26.5446	11.204	9.081	27.4
26.5821	11.232	9.106	27.476
26.6196	11.245	9.137	27.541
26.6571	11.262	9.158	27.621
26.6946	11.291	9.185	27.688
26.7321	11.305	9.215	27.765
26.7696	11.311	9.242	27.836
26.8071	11.303	9.262	27.915
26.8446	11.303	9.285	27.985
26.8821	11.312	9.327	28.061
26.9196	11.315	9.344	28.129
26.9571	11.34	9.371	28.206
26.9946	11.334	9.4	28.275
27.032	11.339	9.425	28.351
27.0695	11.33	9.444	28.419
27.107	11.332	9.467	28.494
27.1445	11.331	9.506	28.561
27.182	11.325	9.528	28.636
27.2195	11.357	9.56	28.704
27.257	11.357	9.584	28.785
27.2945	11.373	9.609	28.852
27.332	11.369	9.643	28.93
27.3695	11.357	9.671	28.996
27.407	11.388	9.695	29.079
27.4445	11.397	9.721	29.149
27.482	11.44	9.754	29.224
27.5194	11.442	9.785	29.29
27.5569	11.493	9.817	29.363
27.5944	11.464	9.84	29.432
27.6319	11.456	9.869	29.508
27.6694	11.486	9.894	29.577
27.7069	11.511	9.927	29.656
27.7444	11.589	9.961	29.725
27.7819	11.591	9.993	29.801
27.8194	11.586	10.01	29.87
27.8569	11.579	10.044	29.944
27.8944	11.579	10.075	30.008
27.9319	11.611	10.099	30.08
27.9694	11.638	10.146	30.144
28.0069	11.672	10.17	30.228
28.0443	11.695	10.196	30.299
28.0818	11.708	10.235	30.376
28.1193	11.735	10.269	30.437
28.1568	11.739	10.299	30.509
28.1943	11.789	10.325	30.574
28.2318	11.813	10.357	30.649
28.2693	11.82	10.391	30.715
28.3068	11.857	10.431	30.793
28.3443	11.873	10.469	30.863
28.3818	11.896	10.503	30.937
28.4193	11.91	10.533	31.003
28.4568	11.948	10.564	31.078
28.4943	11.972	10.6	31.146
28.5317	12.01	10.646	31.222
28.5692	12.033	10.698	31.289
28.6067	12.067	10.74	31.365
28.6442	12.086	10.78	31.434
28.6817	12.1	10.817	31.506
28.7192	12.137	10.88	31.568
28.7567	12.163	10.949	31.641
28.7942	12.197	10.983	31.704
28.8317	12.227	11.046	31.778
28.8692	12.25	11.11	31.839
28.9067	12.279	11.185	31.919
28.9442	12.283	11.26	31.988
28.9817	12.315	11.327	32.067
29.0191	12.35	11.404	32.136
29.0566	12.374	11.492	32.21
29.0941	12.416	11.567	32.275
29.1316	12.435	11.667	32.346
29.1691	12.464	11.755	32.414
29.2066	12.481	11.856	32.489
29.2441	12.508	11.957	32.553
29.2816	12.54	12.058	32.622
29.3191	12.564	12.13	32.686
29.3566	12.609	12.213	32.76
29.3941	12.623	12.301	32.828
29.4316	12.653	12.4	32.902
29.4691	12.674	12.484	32.967
29.5065	12.698	12.567	33.046
29.544	12.727	12.678	33.11
29.5815	12.762	12.733	33.183
29.619	12.796	12.737	33.242
29.6565	12.813	12.782	33.313
29.694	12.852	12.819	33.377
29.7315	12.873	12.866	33.447
29.769	12.896	12.898	33.511
29.8065	12.933	12.91	33.588
29.844	12.954	12.948	33.656
29.8815	12.985	12.937	33.728
29.919	13.021	12.938	33.792
29.9565	13.043	12.964	33.856
29.9939	13.085	12.969	33.918
30.0314	13.154	12.986	33.988
30.0689	13.199	12.99	34.057
30.1064	13.237	12.993	34.13
30.1439	13.269	13.001	34.198
30.1814	13.301	12.988	34.272
30.2189	13.335	12.985	34.34
30.2564	13.368	12.987	34.413
30.2939	13.396	12.982	34.478
30.3314	13.447	13.009	34.55
30.3689	13.462	13.005	34.611
30.4064	13.501	13	34.683
30.4439	13.536	13.005	34.75
30.4814	13.571	12.978	34.822
30.5188	13.605	12.985	34.889
30.5563	13.642	12.992	34.958
30.5938	13.67	12.983	35.021
30.6313	13.707	13.006	35.092
30.6688	13.737	13.002	35.159
30.7063	13.782	13.012	35.233
30.7438	13.809	13.011	35.297
30.7813	13.845	12.987	35.368
30.8188	13.886	12.985	35.432
30.8563	13.912	13.007	35.498
30.8938	13.949	13.012	35.562
30.9313	13.996	13.035	35.631
30.9688	14.031	13.035	35.699
31.0062	14.076	13.067	35.772
31.0437	14.094	13.075	35.842
31.0812	14.123	13.042	35.912
31.1187	14.172	13.054	35.974
31.1562	14.219	13.066	36.046
31.1937	14.243	13.088	36.113
31.2312	14.291	13.118	36.182
31.2687	14.311	13.136	36.249
31.3062	14.367	13.14	36.32
31.3437	14.384	13.155	36.387
31.3812	14.366	13.151	36.456
31.4187	14.409	13.173	36.523
31.4562	14.445	13.206	36.593
31.4936	14.483	13.231	36.66
31.5311	14.517	13.252	36.727
31.5686	14.546	13.273	36.796
31.6061	14.573	13.294	36.868
31.6436	14.609	13.3	36.937
31.6811	14.648	13.313	37.005
31.7186	14.689	13.338	37.069
31.7561	14.752	13.354	37.136
31.7936	14.76	13.379	37.202
31.8311	14.802	13.409	37.269
31.8686	14.854	13.422	37.335
31.9061	14.894	13.446	37.408
31.9436	14.93	13.463	37.474
31.981	14.976	13.476	37.543
32.0185	15.01	13.5	37.609
32.056	15.055	13.52	37.674
32.0935	15.099	13.545	37.736
32.131	15.144	13.57	37.802
32.1685	15.194	13.586	37.87
32.206	15.209	13.608	37.94
32.2435	15.254	13.625	38.006
32.281	15.292	13.63	38.073
32.3185	15.315	13.659	38.136
32.356	15.343	13.671	38.203
32.3935	15.382	13.701	38.271
32.431	15.4	13.721	38.341
32.4685	15.418	13.74	38.412
32.5059	15.441	13.764	38.486
32.5434	15.487	13.775	38.559
32.5809	15.521	13.789	38.629
32.6184	15.552	13.812	38.694
32.6559	15.575	13.821	38.763
32.6934	15.602	13.85	38.826
32.7309	15.618	13.873	38.89
32.7684	15.639	13.891	38.955
32.8059	15.66	13.914	39.024
32.8434	15.652	13.927	39.092
32.8809	15.662	13.945	39.164
32.9184	15.695	13.972	39.233
32.9559	15.736	13.996	39.305
32.9933	15.73	14.021	39.373
33.0308	15.748	14.045	39.442
33.0683	15.774	14.073	39.509
33.1058	15.79	14.104	39.578
33.1433	15.812	14.114	39.643
33.1808	15.828	14.131	39.707
33.2183	15.848	14.158	39.771
33.2558	15.861	14.193	39.842
33.2933	15.879	14.224	39.913
33.3308	15.884	14.245	39.982
33.3683	15.905	14.267	40.047
33.4058	15.921	14.296	40.115
33.4433	15.946	14.309	40.179
33.4807	15.947	14.346	40.247
33.5182	15.953	14.377	40.314
33.5557	15.968	14.4	40.385
33.5932	15.983	14.425	40.453
33.6307	15.99	14.467	40.52
33.6682	16.005	14.484	40.588
33.7057	16.029	14.521	40.658
33.7432		14.538	40.727
33.7807		14.564	40.794
33.8182		14.599	40.859
33.8557		14.622	40.929
33.8932		14.662	40.995
33.9307		14.678	41.06
33.9681		14.704	41.124
34.0056		14.738	41.192
34.0431		14.765	41.258
34.0806		14.793	41.322
34.1181		14.828	41.385
34.1556		14.858	41.452
34.1931		14.879	41.516
34.2306		14.914	41.588
34.2681		14.944	41.658
34.3056		14.968	41.726
34.3431		14.996	41.79
34.3806		15.027	41.853
34.4181		15.049	41.913
34.4555		15.091	41.979
34.493		15.144	42.044
34.5305		15.176	42.109
34.568		15.178	42.174
34.6055		15.217	42.241
34.643		15.232	42.303
34.6805		15.255	42.361
34.718		15.28	42.418
34.7555		15.308	42.48
34.793		15.345	42.541
34.8305		15.381	42.607
34.868		15.414	42.67
34.9055		15.454	42.737
34.943		15.47	42.799
34.9804		15.483	42.861
35.0179		15.514	42.923
35.0554		15.536	42.986
35.0929		15.575	43.041
35.1304		15.58	43.098
35.1679		15.603	43.158
35.2054		15.628	43.223
35.2429		15.654	43.284
35.2804		15.678	43.346
35.3179		15.706	43.406
35.3554		15.774	43.465
35.3929		15.814	43.519
35.4304		15.836	43.577
35.4678		15.878	43.639
35.5053		15.915	43.701
35.5428		15.957	43.756
35.5803		16.002	43.81
35.6178		16.049	43.861
35.6553		16.087	43.916
35.6928		16.13	43.968
35.7303		16.166	44.024
35.7678		16.196	44.08
35.8053		16.234	44.134
35.8428		16.268	44.183
35.8803		16.284	44.234
35.9178		16.295	44.284
35.9552		16.324	44.338
35.9927		16.337	44.392
36.0302		16.331	44.45
36.0677		16.344	44.505
36.1052		16.345	44.558
36.1427		16.322	44.604
36.1802		16.168	44.649
36.2177		16.139	44.68
