# Supplementary material for: The neuronal calcium sensor NCS-1 regulates the phosphorylation state and activity of the Gα chaperone and GEF Ric-8A
Source: eLife journal article supplement (doi:10.7554/elife.86151), 2023-11-27
Supplement: supp [file Fig6C-SEC-chromatograms.xlsx]

## Sheet: 2nd superpos
Unphosphorylated		Phosphorylated
UV		UV
ml	mAU	ml	mAU
5.00021	-0.762032	4.99995	-0.764101
5.00105	-0.762269	5.00078	-0.763874
5.00188	-0.762703	5.00162	-0.763885
5.00271	-0.762154	5.00245	-0.763892
5.00354	-0.762789	5.00328	-0.763961
5.00437	-0.761709	5.00411	-0.764186
5.00521	-0.762786	5.00494	-0.764314
5.00604	-0.762768	5.00578	-0.763846
5.00687	-0.762757	5.00661	-0.764033
5.0077	-0.762371	5.00744	-0.765021
5.00853	-0.763328	5.00827	-0.765407
5.00937	-0.763244	5.0091	-0.765059
5.0102	-0.763656	5.00994	-0.765718
5.01103	-0.76371	5.01077	-0.766762
5.01186	-0.764108	5.0116	-0.767532
5.01269	-0.764381	5.01243	-0.76786
5.01353	-0.764577	5.01326	-0.767722
5.01436	-0.763724	5.0141	-0.76743
5.01519	-0.76299	5.01493	-0.767708
5.01602	-0.761762	5.01576	-0.768705
5.01685	-0.760836	5.01659	-0.769214
5.01769	-0.760255	5.01743	-0.768983
5.01852	-0.760398	5.01826	-0.767965
5.01935	-0.760743	5.01909	-0.767844
5.02018	-0.761512	5.01992	-0.768679
5.02101	-0.761256	5.02075	-0.769035
5.02185	-0.761834	5.02158	-0.768631
5.02268	-0.761657	5.02242	-0.768281
5.02351	-0.761986	5.02325	-0.767745
5.02434	-0.761758	5.02408	-0.767215
5.02517	-0.7615	5.02491	-0.766427
5.02601	-0.760933	5.02574	-0.766669
5.02684	-0.760656	5.02658	-0.767306
5.02767	-0.759263	5.02741	-0.768402
5.0285	-0.759343	5.02824	-0.769287
5.02933	-0.759373	5.02907	-0.769949
5.03017	-0.759128	5.0299	-0.769989
5.031	-0.758653	5.03074	-0.770165
5.03183	-0.758589	5.03157	-0.769506
5.03266	-0.759297	5.0324	-0.768339
5.03349	-0.758826	5.03323	-0.767941
5.03432	-0.75822	5.03406	-0.767979
5.03516	-0.758422	5.0349	-0.768721
5.03599	-0.758683	5.03573	-0.769073
5.03682	-0.75864	5.03656	-0.769335
5.03765	-0.758621	5.03739	-0.770041
5.03848	-0.759063	5.03822	-0.771083
5.03932	-0.759952	5.03906	-0.770725
5.04015	-0.760496	5.03989	-0.769329
5.04098	-0.760317	5.04072	-0.768532
5.04181	-0.760379	5.04155	-0.769808
5.04265	-0.760671	5.04239	-0.769909
5.04348	-0.761899	5.04322	-0.768804
5.04431	-0.762449	5.04405	-0.767812
5.04514	-0.761773	5.04488	-0.768055
5.04597	-0.761352	5.04571	-0.767501
5.0468	-0.760846	5.04655	-0.768181
5.04764	-0.760261	5.04738	-0.770134
5.04847	-0.760303	5.04821	-0.76981
5.0493	-0.760224	5.04904	-0.768499
5.05013	-0.75981	5.04987	-0.769318
5.05096	-0.759609	5.0507	-0.769986
5.0518	-0.759088	5.05154	-0.769811
5.05263	-0.758891	5.05237	-0.770147
5.05346	-0.758279	5.0532	-0.769812
5.05429	-0.758347	5.05403	-0.769424
5.05512	-0.758057	5.05486	-0.768632
5.05596	-0.758159	5.0557	-0.767867
5.05679	-0.759484	5.05653	-0.767482
5.05762	-0.760571	5.05736	-0.765973
5.05845	-0.760572	5.05819	-0.76674
5.05928	-0.760591	5.05902	-0.767134
5.06012	-0.760768	5.05986	-0.767458
5.06095	-0.760479	5.06069	-0.767259
5.06178	-0.76024	5.06152	-0.767155
5.06261	-0.7604	5.06235	-0.767169
5.06344	-0.760461	5.06318	-0.768625
5.06428	-0.760079	5.06402	-0.769127
5.06511	-0.759641	5.06485	-0.768643
5.06594	-0.759788	5.06568	-0.767708
5.06677	-0.760348	5.06651	-0.768312
5.0676	-0.760896	5.06735	-0.768524
5.06844	-0.761358	5.06818	-0.768614
5.06927	-0.761998	5.06901	-0.768891
5.0701	-0.76304	5.06984	-0.768109
5.07093	-0.762784	5.07067	-0.766887
5.07176	-0.76265	5.07151	-0.765754
5.0726	-0.762424	5.07234	-0.765906
5.07343	-0.761885	5.07317	-0.766629
5.07426	-0.761455	5.074	-0.767232
5.07509	-0.760854	5.07483	-0.767554
5.07592	-0.760564	5.07566	-0.767797
5.07676	-0.760926	5.0765	-0.767296
5.07759	-0.760553	5.07733	-0.766877
5.07842	-0.759909	5.07816	-0.766256
5.07925	-0.760205	5.07899	-0.76597
5.08008	-0.761172	5.07982	-0.765071
5.08092	-0.760984	5.08066	-0.765219
5.08175	-0.760171	5.08149	-0.765249
5.08258	-0.759174	5.08232	-0.764712
5.08341	-0.759105	5.08315	-0.765055
5.08424	-0.759092	5.08398	-0.765392
5.08507	-0.759269	5.08482	-0.766183
5.08591	-0.758648	5.08565	-0.767162
5.08674	-0.758673	5.08648	-0.767744
5.08757	-0.759152	5.08731	-0.76761
5.0884	-0.759078	5.08814	-0.766085
5.08923	-0.758386	5.08898	-0.765724
5.09007	-0.759099	5.08981	-0.766269
5.0909	-0.759215	5.09064	-0.766781
5.09173	-0.759376	5.09147	-0.765829
5.09256	-0.759037	5.0923	-0.764931
5.09339	-0.758847	5.09314	-0.764199
5.09423	-0.758911	5.09397	-0.76414
5.09506	-0.758581	5.0948	-0.764882
5.09589	-0.758884	5.09563	-0.765286
5.09672	-0.758797	5.09647	-0.766139
5.09755	-0.758418	5.0973	-0.766245
5.09839	-0.758331	5.09813	-0.766765
5.09922	-0.757889	5.09896	-0.767235
5.10005	-0.757049	5.09979	-0.766462
5.10088	-0.757706	5.10062	-0.766267
5.10171	-0.758409	5.10146	-0.766914
5.10255	-0.758049	5.10229	-0.767218
5.10338	-0.758064	5.10312	-0.767009
5.10421	-0.757852	5.10395	-0.766813
5.10504	-0.756544	5.10478	-0.766513
5.10587	-0.756503	5.10562	-0.76663
5.10671	-0.757354	5.10645	-0.766952
5.10754	-0.757669	5.10728	-0.767324
5.10837	-0.757479	5.10811	-0.767274
5.1092	-0.757708	5.10894	-0.767799
5.11003	-0.757565	5.10978	-0.767861
5.11087	-0.757088	5.11061	-0.767267
5.1117	-0.756766	5.11144	-0.767215
5.11253	-0.756559	5.11227	-0.768197
5.11336	-0.756863	5.11311	-0.769182
5.11419	-0.757454	5.11394	-0.769402
5.11503	-0.758697	5.11477	-0.769377
5.11586	-0.759697	5.1156	-0.769177
5.11669	-0.760902	5.11643	-0.768934
5.11752	-0.761709	5.11726	-0.768753
5.11835	-0.761742	5.1181	-0.769401
5.11918	-0.761888	5.11893	-0.769379
5.12002	-0.762366	5.11976	-0.769649
5.12085	-0.762506	5.12059	-0.768883
5.12168	-0.761742	5.12143	-0.769231
5.12251	-0.762296	5.12226	-0.769697
5.12334	-0.763132	5.12309	-0.770407
5.12418	-0.763645	5.12392	-0.771177
5.12501	-0.764475	5.12475	-0.77098
5.12584	-0.764786	5.12559	-0.771156
5.12667	-0.764545	5.12642	-0.771624
5.12751	-0.764905	5.12725	-0.771554
5.12834	-0.765335	5.12808	-0.77131
5.12917	-0.765851	5.12891	-0.770908
5.13	-0.766748	5.12974	-0.771213
5.13083	-0.766906	5.13058	-0.771404
5.13166	-0.766071	5.13141	-0.771424
5.1325	-0.766283	5.13224	-0.771427
5.13333	-0.76636	5.13307	-0.77159
5.13416	-0.766664	5.1339	-0.771882
5.13499	-0.766768	5.13474	-0.772041
5.13582	-0.766361	5.13557	-0.772392
5.13666	-0.766602	5.1364	-0.771061
5.13749	-0.766973	5.13723	-0.76972
5.13832	-0.767759	5.13807	-0.769928
5.13915	-0.767837	5.1389	-0.769955
5.13998	-0.768021	5.13973	-0.770826
5.14082	-0.768408	5.14056	-0.770724
5.14165	-0.769256	5.14139	-0.770951
5.14248	-0.768737	5.14222	-0.771206
5.14331	-0.767729	5.14306	-0.771681
5.14414	-0.768104	5.14389	-0.771643
5.14498	-0.768011	5.14472	-0.77201
5.14581	-0.768144	5.14555	-0.772005
5.14664	-0.768941	5.14639	-0.772254
5.14747	-0.768717	5.14722	-0.772855
5.1483	-0.767694	5.14805	-0.771962
5.14914	-0.766949	5.14888	-0.772736
5.14997	-0.767447	5.14971	-0.772485
5.1508	-0.767193	5.15055	-0.77336
5.15163	-0.76672	5.15138	-0.772882
5.15246	-0.766613	5.15221	-0.771755
5.1533	-0.765562	5.15304	-0.771755
5.15413	-0.764535	5.15387	-0.772436
5.15496	-0.763951	5.1547	-0.772933
5.15579	-0.763523	5.15554	-0.771873
5.15662	-0.762657	5.15637	-0.770999
5.15745	-0.762596	5.1572	-0.771111
5.15829	-0.762075	5.15803	-0.771216
5.15912	-0.760941	5.15886	-0.771446
5.15995	-0.760823	5.1597	-0.772135
5.16078	-0.760804	5.16053	-0.771583
5.16162	-0.760561	5.16136	-0.772228
5.16245	-0.760397	5.16219	-0.772917
5.16328	-0.760664	5.16303	-0.77373
5.16411	-0.760398	5.16386	-0.774155
5.16494	-0.759909	5.16469	-0.773853
5.16578	-0.759564	5.16552	-0.772793
5.16661	-0.75915	5.16635	-0.771885
5.16744	-0.758416	5.16718	-0.771049
5.16827	-0.758467	5.16802	-0.770097
5.1691	-0.758226	5.16885	-0.77014
5.16993	-0.757484	5.16968	-0.770801
5.17077	-0.756683	5.17051	-0.770314
5.1716	-0.757085	5.17134	-0.771073
5.17243	-0.757747	5.17218	-0.771802
5.17326	-0.758318	5.17301	-0.77205
5.17409	-0.758422	5.17384	-0.771782
5.17493	-0.757946	5.17467	-0.771544
5.17576	-0.758088	5.17551	-0.770738
5.17659	-0.758935	5.17634	-0.770931
5.17742	-0.759392	5.17717	-0.770106
5.17825	-0.759296	5.178	-0.770483
5.17909	-0.759686	5.17883	-0.771254
5.17992	-0.75905	5.17966	-0.771355
5.18075	-0.75929	5.1805	-0.771078
5.18158	-0.759267	5.18133	-0.770994
5.18241	-0.758605	5.18216	-0.771721
5.18325	-0.75796	5.18299	-0.771036
5.18408	-0.757751	5.18382	-0.770964
5.18491	-0.75878	5.18466	-0.770615
5.18574	-0.759192	5.18549	-0.770236
5.18657	-0.76007	5.18632	-0.769771
5.18741	-0.75996	5.18715	-0.769538
5.18824	-0.760041	5.18799	-0.769047
5.18907	-0.761044	5.18882	-0.76794
5.1899	-0.762022	5.18965	-0.767486
5.19073	-0.762509	5.19048	-0.766971
5.19157	-0.761348	5.19131	-0.767465
5.1924	-0.760576	5.19215	-0.767004
5.19323	-0.760586	5.19298	-0.766749
5.19406	-0.761413	5.19381	-0.767524
5.19489	-0.763247	5.19464	-0.768229
5.19573	-0.765068	5.19547	-0.768373
5.19656	-0.76533	5.1963	-0.768279
5.19739	-0.765509	5.19714	-0.768686
5.19822	-0.765834	5.19797	-0.768401
5.19905	-0.765507	5.1988	-0.767863
5.19989	-0.764314	5.19963	-0.768003
5.20072	-0.764556	5.20047	-0.76871
5.20155	-0.764103	5.2013	-0.769065
5.20238	-0.763608	5.20213	-0.769838
5.20321	-0.764758	5.20296	-0.769496
5.20404	-0.765155	5.20379	-0.768703
5.20488	-0.765189	5.20463	-0.768048
5.20571	-0.764526	5.20546	-0.767891
5.20654	-0.764627	5.20629	-0.76857
5.20737	-0.765315	5.20712	-0.76912
5.20821	-0.764952	5.20795	-0.770312
5.20904	-0.765468	5.20878	-0.771889
5.20987	-0.765442	5.20962	-0.772669
5.2107	-0.765156	5.21045	-0.772499
5.21153	-0.766225	5.21128	-0.771633
5.21236	-0.766348	5.21211	-0.772136
5.2132	-0.765024	5.21295	-0.771685
5.21403	-0.764623	5.21378	-0.770898
5.21486	-0.764317	5.21461	-0.770768
5.21569	-0.765449	5.21544	-0.770739
5.21652	-0.765848	5.21627	-0.77093
5.21736	-0.765838	5.21711	-0.77186
5.21819	-0.765415	5.21794	-0.773108
5.21902	-0.76581	5.21877	-0.773165
5.21985	-0.765376	5.2196	-0.773341
5.22068	-0.764096	5.22043	-0.773266
5.22152	-0.764795	5.22126	-0.772509
5.22235	-0.764619	5.2221	-0.771732
5.22318	-0.764974	5.22293	-0.770579
5.22401	-0.764649	5.22376	-0.76954
5.22484	-0.764306	5.22459	-0.769514
5.22568	-0.765118	5.22543	-0.769091
5.22651	-0.764636	5.22626	-0.769412
5.22734	-0.763935	5.22709	-0.769777
5.22817	-0.763986	5.22792	-0.769337
5.229	-0.764521	5.22875	-0.769276
5.22984	-0.764944	5.22959	-0.770042
5.23067	-0.763993	5.23042	-0.771311
5.2315	-0.763433	5.23125	-0.771591
5.23233	-0.76351	5.23208	-0.771976
5.23316	-0.764016	5.23291	-0.771508
5.234	-0.76411	5.23374	-0.772096
5.23483	-0.763911	5.23458	-0.772296
5.23566	-0.763148	5.23541	-0.772295
5.23649	-0.763301	5.23624	-0.771542
5.23732	-0.76255	5.23707	-0.771361
5.23815	-0.761596	5.2379	-0.771453
5.23899	-0.760793	5.23874	-0.770822
5.23982	-0.760271	5.23957	-0.771172
5.24065	-0.761075	5.2404	-0.770424
5.24148	-0.761821	5.24123	-0.770189
5.24231	-0.761733	5.24207	-0.768856
5.24315	-0.76159	5.2429	-0.769111
5.24398	-0.762167	5.24373	-0.768314
5.24481	-0.761284	5.24456	-0.767567
5.24564	-0.760706	5.24539	-0.767851
5.24648	-0.760704	5.24622	-0.767307
5.24731	-0.761259	5.24706	-0.767244
5.24814	-0.761784	5.24789	-0.766291
5.24897	-0.76122	5.24872	-0.766186
5.2498	-0.760891	5.24955	-0.765602
5.25063	-0.760938	5.25038	-0.764816
5.25147	-0.759976	5.25122	-0.765559
5.2523	-0.759944	5.25205	-0.765473
5.25313	-0.759303	5.25288	-0.766394
5.25396	-0.759066	5.25371	-0.766367
5.25479	-0.759316	5.25455	-0.766249
5.25563	-0.760063	5.25538	-0.765684
5.25646	-0.760022	5.25621	-0.765943
5.25729	-0.758924	5.25704	-0.765577
5.25812	-0.758835	5.25787	-0.765446
5.25895	-0.757909	5.2587	-0.764891
5.25979	-0.75755	5.25954	-0.763859
5.26062	-0.757858	5.26037	-0.764519
5.26145	-0.759119	5.2612	-0.764742
5.26228	-0.759427	5.26203	-0.765484
5.26311	-0.759143	5.26286	-0.766078
5.26395	-0.759868	5.2637	-0.766756
5.26478	-0.759788	5.26453	-0.767306
5.26561	-0.760881	5.26536	-0.767566
5.26644	-0.761515	5.26619	-0.767335
5.26727	-0.760651	5.26703	-0.766773
5.26811	-0.760489	5.26786	-0.766687
5.26894	-0.760884	5.26869	-0.766935
5.26977	-0.760302	5.26952	-0.767227
5.2706	-0.761056	5.27035	-0.767254
5.27143	-0.761416	5.27119	-0.766686
5.27226	-0.761895	5.27202	-0.766639
5.2731	-0.762688	5.27285	-0.767126
5.27393	-0.762826	5.27368	-0.767109
5.27476	-0.762713	5.27451	-0.767422
5.27559	-0.763312	5.27534	-0.767476
5.27642	-0.764412	5.27618	-0.768223
5.27726	-0.764665	5.27701	-0.767365
5.27809	-0.764504	5.27784	-0.767355
5.27892	-0.765451	5.27867	-0.767494
5.27975	-0.766316	5.27951	-0.766835
5.28059	-0.766739	5.28034	-0.767765
5.28142	-0.766838	5.28117	-0.768479
5.28225	-0.766477	5.282	-0.769168
5.28308	-0.767213	5.28283	-0.768735
5.28391	-0.768342	5.28367	-0.769483
5.28475	-0.768477	5.2845	-0.76845
5.28558	-0.768186	5.28533	-0.769074
5.28641	-0.768388	5.28616	-0.769854
5.28724	-0.768379	5.28699	-0.769394
5.28807	-0.768039	5.28782	-0.770022
5.2889	-0.767941	5.28866	-0.769802
5.28974	-0.767878	5.28949	-0.770146
5.29057	-0.768089	5.29032	-0.770629
5.2914	-0.767727	5.29115	-0.770501
5.29223	-0.767905	5.29199	-0.77038
5.29306	-0.768266	5.29282	-0.768755
5.2939	-0.767641	5.29365	-0.768504
5.29473	-0.767254	5.29448	-0.767859
5.29556	-0.767588	5.29531	-0.767998
5.29639	-0.76786	5.29615	-0.768354
5.29722	-0.768086	5.29698	-0.768801
5.29806	-0.768682	5.29781	-0.76796
5.29889	-0.768338	5.29864	-0.768648
5.29972	-0.768219	5.29947	-0.769282
5.30055	-0.768836	5.3003	-0.769773
5.30138	-0.768711	5.30114	-0.769927
5.30222	-0.768295	5.30197	-0.76947
5.30305	-0.76817	5.3028	-0.768779
5.30388	-0.768298	5.30363	-0.768878
5.30471	-0.767958	5.30447	-0.768383
5.30554	-0.767722	5.3053	-0.768557
5.30638	-0.768127	5.30613	-0.768319
5.30721	-0.768266	5.30696	-0.768372
5.30804	-0.768914	5.30779	-0.768836
5.30887	-0.769637	5.30863	-0.769003
5.3097	-0.769461	5.30946	-0.768692
5.31053	-0.76966	5.31029	-0.767986
5.31137	-0.769365	5.31112	-0.768381
5.3122	-0.768604	5.31195	-0.767889
5.31303	-0.768015	5.31278	-0.767169
5.31386	-0.767637	5.31362	-0.76647
5.3147	-0.76802	5.31445	-0.765718
5.31553	-0.768829	5.31528	-0.76474
5.31636	-0.769224	5.31611	-0.763866
5.31719	-0.76842	5.31694	-0.763152
5.31802	-0.767802	5.31778	-0.761942
5.31886	-0.767451	5.31861	-0.761786
5.31969	-0.767104	5.31944	-0.761947
5.32052	-0.766826	5.32027	-0.762771
5.32135	-0.766705	5.32111	-0.763416
5.32218	-0.766558	5.32194	-0.762645
5.32301	-0.766583	5.32277	-0.761708
5.32385	-0.767282	5.3236	-0.76159
5.32468	-0.766884	5.32443	-0.761864
5.32551	-0.766439	5.32526	-0.761573
5.32634	-0.766605	5.3261	-0.761801
5.32718	-0.766278	5.32693	-0.761794
5.32801	-0.766256	5.32776	-0.761649
5.32884	-0.766664	5.32859	-0.761733
5.32967	-0.766808	5.32942	-0.761482
5.3305	-0.767065	5.33026	-0.761754
5.33133	-0.767005	5.33109	-0.762146
5.33217	-0.767671	5.33192	-0.761771
5.333	-0.76816	5.33275	-0.761969
5.33383	-0.768255	5.33359	-0.762882
5.33466	-0.768083	5.33442	-0.763028
5.33549	-0.768278	5.33525	-0.762976
5.33633	-0.768203	5.33608	-0.763263
5.33716	-0.767739	5.33691	-0.762872
5.33799	-0.767522	5.33774	-0.762647
5.33882	-0.767287	5.33858	-0.762846
5.33965	-0.766832	5.33941	-0.763197
5.34049	-0.766688	5.34024	-0.76286
5.34132	-0.766952	5.34107	-0.762321
5.34215	-0.767621	5.3419	-0.761925
5.34298	-0.768355	5.34274	-0.761669
5.34381	-0.768854	5.34357	-0.762051
5.34465	-0.768406	5.3444	-0.762366
5.34548	-0.768677	5.34523	-0.762302
5.34631	-0.768487	5.34607	-0.76216
5.34714	-0.768136	5.3469	-0.76211
5.34797	-0.767425	5.34773	-0.762114
5.3488	-0.766429	5.34856	-0.762204
5.34964	-0.765417	5.34939	-0.76228
5.35047	-0.764592	5.35023	-0.762618
5.3513	-0.764675	5.35106	-0.763405
5.35213	-0.764648	5.35189	-0.763537
5.35297	-0.764277	5.35272	-0.763459
5.3538	-0.763859	5.35355	-0.763864
5.35463	-0.764074	5.35438	-0.764023
5.35546	-0.764156	5.35522	-0.76406
5.35629	-0.764148	5.35605	-0.764568
5.35712	-0.763438	5.35688	-0.765617
5.35796	-0.76275	5.35771	-0.765553
5.35879	-0.762393	5.35855	-0.765254
5.35962	-0.762132	5.35938	-0.765881
5.36045	-0.762238	5.36021	-0.766362
5.36128	-0.762262	5.36104	-0.766154
5.36212	-0.761909	5.36187	-0.765565
5.36295	-0.761761	5.36271	-0.765422
5.36378	-0.761977	5.36354	-0.765469
5.36461	-0.761356	5.36437	-0.765797
5.36545	-0.760872	5.3652	-0.765639
5.36628	-0.760355	5.36603	-0.765848
5.36711	-0.759747	5.36686	-0.766224
5.36794	-0.759916	5.3677	-0.766181
5.36877	-0.76002	5.36853	-0.76591
5.3696	-0.759975	5.36936	-0.76557
5.37044	-0.760428	5.37019	-0.764989
5.37127	-0.760213	5.37103	-0.765079
5.3721	-0.760164	5.37186	-0.765111
5.37293	-0.759081	5.37269	-0.765531
5.37376	-0.758283	5.37352	-0.765505
5.3746	-0.757721	5.37435	-0.764449
5.37543	-0.757814	5.37519	-0.76427
5.37626	-0.758126	5.37602	-0.765414
5.37709	-0.758211	5.37685	-0.765688
5.37792	-0.758808	5.37768	-0.765926
5.37876	-0.759447	5.37851	-0.76618
5.37959	-0.759223	5.37934	-0.766399
5.38042	-0.760216	5.38018	-0.766018
5.38125	-0.759536	5.38101	-0.765692
5.38208	-0.759161	5.38184	-0.766064
5.38291	-0.759568	5.38267	-0.76591
5.38375	-0.759896	5.38351	-0.765768
5.38458	-0.759357	5.38434	-0.764853
5.38541	-0.758633	5.38517	-0.764688
5.38624	-0.757648	5.386	-0.764685
5.38708	-0.757283	5.38683	-0.764994
5.38791	-0.757793	5.38767	-0.765408
5.38874	-0.757336	5.3885	-0.765565
5.38957	-0.757767	5.38933	-0.765273
5.3904	-0.757917	5.39016	-0.764728
5.39123	-0.758244	5.39099	-0.76524
5.39207	-0.758467	5.39182	-0.764775
5.3929	-0.757535	5.39266	-0.764824
5.39373	-0.757888	5.39349	-0.765054
5.39456	-0.757507	5.39432	-0.765101
5.39539	-0.758061	5.39515	-0.765114
5.39623	-0.759387	5.39598	-0.76573
5.39706	-0.759598	5.39682	-0.765827
5.39789	-0.760046	5.39765	-0.765557
5.39872	-0.76046	5.39848	-0.765408
5.39956	-0.76129	5.39931	-0.766245
5.40039	-0.76037	5.40015	-0.766683
5.40122	-0.761242	5.40098	-0.766644
5.40205	-0.761267	5.40181	-0.767256
5.40288	-0.760776	5.40264	-0.766506
5.40372	-0.761001	5.40347	-0.766122
5.40455	-0.760774	5.4043	-0.765848
5.40538	-0.760489	5.40514	-0.766231
5.40621	-0.761738	5.40597	-0.766414
5.40704	-0.761947	5.4068	-0.766178
5.40787	-0.762117	5.40763	-0.766448
5.40871	-0.762098	5.40846	-0.766403
5.40954	-0.762799	5.4093	-0.766053
5.41037	-0.762199	5.41013	-0.766203
5.4112	-0.762587	5.41096	-0.766381
5.41203	-0.76141	5.41179	-0.766669
5.41287	-0.761352	5.41263	-0.767059
5.4137	-0.761883	5.41346	-0.766733
5.41453	-0.76263	5.41429	-0.766289
5.41536	-0.763428	5.41512	-0.766147
5.41619	-0.763952	5.41595	-0.766313
5.41703	-0.763793	5.41678	-0.765773
5.41786	-0.763882	5.41762	-0.76613
5.41869	-0.763862	5.41845	-0.765536
5.41952	-0.763273	5.41928	-0.764684
5.42035	-0.762076	5.42011	-0.763978
5.42119	-0.762698	5.42094	-0.764175
5.42202	-0.762162	5.42178	-0.763738
5.42285	-0.76279	5.42261	-0.763784
5.42368	-0.763402	5.42344	-0.763528
5.42451	-0.763139	5.42427	-0.762932
5.42535	-0.763464	5.42511	-0.762877
5.42618	-0.763098	5.42594	-0.763279
5.42701	-0.763899	5.42677	-0.763817
5.42784	-0.765024	5.4276	-0.764043
5.42867	-0.765564	5.42843	-0.763606
5.4295	-0.764558	5.42927	-0.763474
5.43034	-0.765302	5.4301	-0.763557
5.43117	-0.765413	5.43093	-0.763608
5.432	-0.764913	5.43176	-0.763912
5.43283	-0.765525	5.43259	-0.764128
5.43367	-0.766397	5.43342	-0.764078
5.4345	-0.766947	5.43426	-0.763502
5.43533	-0.767547	5.43509	-0.763282
5.43616	-0.768493	5.43592	-0.763198
5.43699	-0.768364	5.43675	-0.7632
5.43783	-0.766941	5.43759	-0.76348
5.43866	-0.766129	5.43842	-0.76312
5.43949	-0.765717	5.43925	-0.762192
5.44032	-0.764855	5.44008	-0.761621
5.44115	-0.764889	5.44091	-0.761653
5.44198	-0.765715	5.44175	-0.7614
5.44282	-0.765142	5.44258	-0.761256
5.44365	-0.765417	5.44341	-0.761415
5.44448	-0.765327	5.44424	-0.760756
5.44531	-0.76549	5.44507	-0.760103
5.44614	-0.765723	5.4459	-0.760572
5.44698	-0.765257	5.44674	-0.760935
5.44781	-0.764853	5.44757	-0.760983
5.44864	-0.765111	5.4484	-0.760227
5.44947	-0.765244	5.44923	-0.76009
5.45031	-0.764678	5.45007	-0.760034
5.45114	-0.763555	5.4509	-0.759943
5.45197	-0.7638	5.45173	-0.760072
5.4528	-0.763125	5.45256	-0.759737
5.45363	-0.763605	5.45339	-0.760174
5.45446	-0.763295	5.45423	-0.761072
5.4553	-0.763127	5.45506	-0.761681
5.45613	-0.763878	5.45589	-0.761598
5.45696	-0.764078	5.45672	-0.761429
5.45779	-0.764526	5.45755	-0.761422
5.45862	-0.764559	5.45838	-0.761502
5.45946	-0.763818	5.45922	-0.761609
5.46029	-0.763516	5.46005	-0.761706
5.46112	-0.764232	5.46088	-0.762539
5.46195	-0.764512	5.46171	-0.762827
5.46278	-0.764496	5.46255	-0.762898
5.46362	-0.763718	5.46338	-0.763202
5.46445	-0.764195	5.46421	-0.763644
5.46528	-0.764636	5.46504	-0.764109
5.46611	-0.765113	5.46587	-0.764672
5.46694	-0.764837	5.46671	-0.764957
5.46777	-0.764893	5.46754	-0.764315
5.46861	-0.764779	5.46837	-0.764197
5.46944	-0.763923	5.4692	-0.764303
5.47027	-0.763831	5.47003	-0.76422
5.4711	-0.764327	5.47086	-0.764203
5.47194	-0.763839	5.4717	-0.763546
5.47277	-0.763628	5.47253	-0.762657
5.4736	-0.764205	5.47336	-0.762016
5.47443	-0.763795	5.47419	-0.761868
5.47526	-0.762715	5.47502	-0.761343
5.47609	-0.762788	5.47586	-0.76103
5.47693	-0.762695	5.47669	-0.76061
5.47776	-0.762864	5.47752	-0.760566
5.47859	-0.762288	5.47835	-0.760561
5.47942	-0.762749	5.47919	-0.760619
5.48025	-0.763178	5.48002	-0.760657
5.48109	-0.763532	5.48085	-0.760947
5.48192	-0.763748	5.48168	-0.761805
5.48275	-0.763068	5.48251	-0.762138
5.48358	-0.762249	5.48335	-0.762272
5.48442	-0.762881	5.48418	-0.762578
5.48525	-0.763428	5.48501	-0.763221
5.48608	-0.763828	5.48584	-0.763212
5.48691	-0.763748	5.48667	-0.763031
5.48774	-0.764149	5.4875	-0.762989
5.48857	-0.764429	5.48834	-0.763247
5.48941	-0.764389	5.48917	-0.763804
5.49024	-0.765038	5.49	-0.764153
5.49107	-0.76532	5.49083	-0.764391
5.4919	-0.766055	5.49167	-0.764236
5.49273	-0.766716	5.4925	-0.763653
5.49357	-0.767106	5.49333	-0.763925
5.4944	-0.767486	5.49416	-0.76415
5.49523	-0.767587	5.49499	-0.763934
5.49606	-0.767891	5.49582	-0.763309
5.49689	-0.767635	5.49666	-0.763212
5.49773	-0.767249	5.49749	-0.763122
5.49856	-0.767009	5.49832	-0.762663
5.49939	-0.766715	5.49915	-0.762492
5.50022	-0.767191	5.49998	-0.763031
5.50105	-0.767682	5.50082	-0.763188
5.50189	-0.767492	5.50165	-0.763075
5.50272	-0.767575	5.50248	-0.76241
5.50355	-0.767698	5.50331	-0.762505
5.50438	-0.767988	5.50415	-0.762253
5.50521	-0.768624	5.50498	-0.761743
5.50605	-0.767976	5.50581	-0.761654
5.50688	-0.767273	5.50664	-0.761603
5.50771	-0.767443	5.50747	-0.761082
5.50854	-0.767976	5.50831	-0.760651
5.50937	-0.767942	5.50914	-0.761411
5.51021	-0.768013	5.50997	-0.761696
5.51104	-0.768382	5.5108	-0.762329
5.51187	-0.768454	5.51163	-0.763073
5.5127	-0.768071	5.51246	-0.763199
5.51353	-0.76761	5.5133	-0.763634
5.51436	-0.767636	5.51413	-0.764201
5.5152	-0.767507	5.51496	-0.764751
5.51603	-0.767289	5.51579	-0.764647
5.51686	-0.767756	5.51663	-0.764971
5.51769	-0.76796	5.51746	-0.765857
5.51853	-0.767459	5.51829	-0.766423
5.51936	-0.767606	5.51912	-0.765979
5.52019	-0.767995	5.51995	-0.765958
5.52102	-0.76774	5.52079	-0.765742
5.52185	-0.767676	5.52162	-0.765631
5.52269	-0.76753	5.52245	-0.765542
5.52352	-0.766985	5.52328	-0.765304
5.52435	-0.766726	5.52411	-0.764835
5.52518	-0.76682	5.52494	-0.764462
5.52601	-0.766628	5.52578	-0.763701
5.52684	-0.76614	5.52661	-0.762551
5.52768	-0.765937	5.52744	-0.762389
5.52851	-0.76592	5.52827	-0.762703
5.52934	-0.765158	5.52911	-0.762972
5.53017	-0.765041	5.52994	-0.762782
5.531	-0.764629	5.53077	-0.762367
5.53184	-0.764334	5.5316	-0.76175
5.53267	-0.764549	5.53243	-0.7614
5.5335	-0.764398	5.53327	-0.7615
5.53433	-0.764413	5.5341	-0.761805
5.53516	-0.764627	5.53493	-0.761796
5.536	-0.764767	5.53576	-0.762182
5.53683	-0.764728	5.53659	-0.762064
5.53766	-0.764536	5.53743	-0.761846
5.53849	-0.764652	5.53826	-0.762364
5.53932	-0.764511	5.53909	-0.76283
5.54016	-0.764268	5.53992	-0.76327
5.54099	-0.76415	5.54075	-0.763133
5.54182	-0.763296	5.54159	-0.763178
5.54265	-0.763049	5.54242	-0.763724
5.54348	-0.763673	5.54325	-0.764148
5.54432	-0.764168	5.54408	-0.764722
5.54515	-0.764053	5.54491	-0.764703
5.54598	-0.763718	5.54575	-0.764447
5.54681	-0.763315	5.54658	-0.764611
5.54764	-0.763099	5.54741	-0.764283
5.54847	-0.76298	5.54824	-0.763764
5.54931	-0.76295	5.54907	-0.764439
5.55014	-0.763006	5.5499	-0.764757
5.55097	-0.762331	5.55074	-0.76441
5.5518	-0.761886	5.55157	-0.76416
5.55264	-0.761295	5.5524	-0.762932
5.55347	-0.760798	5.55323	-0.762152
5.5543	-0.760956	5.55407	-0.762836
5.55513	-0.7618	5.5549	-0.76341
5.55596	-0.762015	5.55573	-0.76317
5.5568	-0.762121	5.55656	-0.762882
5.55763	-0.762405	5.55739	-0.763611
5.55846	-0.762232	5.55823	-0.764134
5.55929	-0.761697	5.55906	-0.764104
5.56012	-0.761281	5.55989	-0.764026
5.56095	-0.761717	5.56072	-0.763913
5.56179	-0.762287	5.56155	-0.763945
5.56262	-0.761997	5.56239	-0.763694
5.56345	-0.761583	5.56322	-0.764133
5.56428	-0.761588	5.56405	-0.764948
5.56511	-0.762509	5.56488	-0.765387
5.56595	-0.763769	5.56571	-0.765525
5.56678	-0.764509	5.56654	-0.765661
5.56761	-0.764298	5.56738	-0.766123
5.56844	-0.76462	5.56821	-0.766909
5.56927	-0.764433	5.56904	-0.767395
5.57011	-0.764779	5.56987	-0.767461
5.57094	-0.764972	5.57071	-0.767678
5.57177	-0.764684	5.57154	-0.767708
5.5726	-0.765079	5.57237	-0.768356
5.57343	-0.764165	5.5732	-0.769115
5.57427	-0.76381	5.57403	-0.76907
5.5751	-0.763184	5.57487	-0.769223
5.57593	-0.763621	5.5757	-0.769432
5.57676	-0.76383	5.57653	-0.769204
5.57759	-0.763443	5.57736	-0.768785
5.57843	-0.76277	5.57819	-0.769231
5.57926	-0.763367	5.57903	-0.769395
5.58009	-0.763088	5.57986	-0.768604
5.58092	-0.764209	5.58069	-0.767955
5.58175	-0.764295	5.58152	-0.767659
5.58259	-0.764415	5.58235	-0.767841
5.58342	-0.764673	5.58319	-0.767811
5.58425	-0.764797	5.58402	-0.767399
5.58508	-0.764144	5.58485	-0.76699
5.58591	-0.764313	5.58568	-0.766448
5.58674	-0.764445	5.58651	-0.766586
5.58758	-0.764367	5.58735	-0.76716
5.58841	-0.764436	5.58818	-0.76752
5.58924	-0.765091	5.58901	-0.768538
5.59007	-0.764657	5.58984	-0.769423
5.59091	-0.764367	5.59067	-0.769525
5.59174	-0.764484	5.59151	-0.769943
5.59257	-0.764696	5.59234	-0.770178
5.5934	-0.764787	5.59317	-0.770311
5.59423	-0.76586	5.594	-0.771011
5.59506	-0.764749	5.59483	-0.771509
5.5959	-0.764996	5.59567	-0.771208
5.59673	-0.764353	5.5965	-0.770803
5.59756	-0.765212	5.59733	-0.770761
5.59839	-0.765757	5.59816	-0.771321
5.59922	-0.76543	5.59899	-0.771583
5.60006	-0.764814	5.59983	-0.772058
5.60089	-0.765963	5.60066	-0.771984
5.60172	-0.765034	5.60149	-0.772217
5.60255	-0.764187	5.60232	-0.771536
5.60338	-0.763707	5.60315	-0.771126
5.60422	-0.76455	5.60399	-0.77161
5.60505	-0.76444	5.60482	-0.771579
5.60588	-0.764207	5.60565	-0.771268
5.60671	-0.763588	5.60648	-0.771193
5.60754	-0.762768	5.60731	-0.771336
5.60838	-0.762709	5.60815	-0.77152
5.60921	-0.762866	5.60898	-0.771415
5.61004	-0.762648	5.60981	-0.770561
5.61087	-0.762603	5.61064	-0.770262
5.6117	-0.762695	5.61147	-0.769703
5.61254	-0.763381	5.61231	-0.769036
5.61337	-0.763191	5.61314	-0.769358
5.6142	-0.762676	5.61397	-0.769476
5.61503	-0.763038	5.6148	-0.770902
5.61586	-0.762695	5.61563	-0.771415
5.6167	-0.762604	5.61647	-0.770768
5.61753	-0.762185	5.6173	-0.769722
5.61836	-0.761838	5.61813	-0.769775
5.61919	-0.763026	5.61896	-0.770366
5.62002	-0.763365	5.61979	-0.770387
5.62086	-0.76281	5.62063	-0.769591
5.62169	-0.762712	5.62146	-0.769742
5.62252	-0.762572	5.62229	-0.770106
5.62335	-0.761749	5.62312	-0.770658
5.62418	-0.76169	5.62395	-0.770264
5.62502	-0.762434	5.62479	-0.769686
5.62585	-0.763159	5.62562	-0.769895
5.62668	-0.763237	5.62645	-0.769796
5.62751	-0.762648	5.62728	-0.769334
5.62834	-0.76287	5.62811	-0.769633
5.62918	-0.763368	5.62895	-0.769646
5.63001	-0.763541	5.62978	-0.769256
5.63084	-0.763331	5.63061	-0.76897
5.63167	-0.76341	5.63144	-0.768477
5.6325	-0.763489	5.63227	-0.76804
5.63333	-0.763108	5.63311	-0.767125
5.63417	-0.763367	5.63394	-0.767312
5.635	-0.763789	5.63477	-0.767129
5.63583	-0.763839	5.6356	-0.766412
5.63666	-0.763987	5.63643	-0.765036
5.6375	-0.765059	5.63727	-0.764579
5.63833	-0.765841	5.6381	-0.764603
5.63916	-0.765974	5.63893	-0.765328
5.63999	-0.765043	5.63976	-0.764851
5.64082	-0.764532	5.64059	-0.763309
5.64165	-0.765184	5.64143	-0.762459
5.64249	-0.765285	5.64226	-0.76277
5.64332	-0.764295	5.64309	-0.763231
5.64415	-0.765408	5.64392	-0.764488
5.64498	-0.765343	5.64475	-0.764282
5.64581	-0.764914	5.64559	-0.764584
5.64665	-0.764337	5.64642	-0.763931
5.64748	-0.765188	5.64725	-0.764055
5.64831	-0.765077	5.64808	-0.763701
5.64914	-0.765246	5.64891	-0.76356
5.64997	-0.764797	5.64975	-0.764388
5.65081	-0.76425	5.65058	-0.764338
5.65164	-0.764661	5.65141	-0.765519
5.65247	-0.764865	5.65224	-0.766468
5.6533	-0.764563	5.65307	-0.766841
5.65413	-0.764554	5.65391	-0.766584
5.65497	-0.76458	5.65474	-0.76654
5.6558	-0.764575	5.65557	-0.765433
5.65663	-0.76491	5.6564	-0.764409
5.65746	-0.765073	5.65723	-0.764696
5.65829	-0.765179	5.65807	-0.765508
5.65913	-0.765263	5.6589	-0.766784
5.65996	-0.764811	5.65973	-0.766456
5.66079	-0.764607	5.66056	-0.766007
5.66162	-0.764513	5.66139	-0.766514
5.66245	-0.764299	5.66223	-0.767486
5.66329	-0.764675	5.66306	-0.76792
5.66412	-0.764948	5.66389	-0.76857
5.66495	-0.764767	5.66472	-0.768799
5.66578	-0.765176	5.66555	-0.769091
5.66661	-0.765732	5.66639	-0.769323
5.66744	-0.765376	5.66722	-0.768872
5.66828	-0.764491	5.66805	-0.769343
5.66911	-0.764105	5.66888	-0.770104
5.66994	-0.764134	5.66971	-0.769616
5.67077	-0.763803	5.67055	-0.769071
5.6716	-0.763323	5.67138	-0.76924
5.67244	-0.762997	5.67221	-0.769195
5.67327	-0.763133	5.67304	-0.769618
5.6741	-0.763111	5.67387	-0.769999
5.67493	-0.763093	5.67471	-0.770185
5.67577	-0.76322	5.67554	-0.770163
5.6766	-0.762776	5.67637	-0.770821
5.67743	-0.762038	5.6772	-0.771756
5.67826	-0.761652	5.67803	-0.772566
5.67909	-0.761533	5.67887	-0.772926
5.67992	-0.761335	5.6797	-0.772745
5.68076	-0.761282	5.68053	-0.772557
5.68159	-0.761101	5.68136	-0.773479
5.68242	-0.761017	5.68219	-0.77453
5.68325	-0.761044	5.68303	-0.775052
5.68408	-0.76107	5.68386	-0.774604
5.68492	-0.761283	5.68469	-0.774548
5.68575	-0.760849	5.68552	-0.774931
5.68658	-0.760539	5.68635	-0.775111
5.68741	-0.761105	5.68719	-0.775043
5.68824	-0.761408	5.68802	-0.7758
5.68908	-0.761172	5.68885	-0.775142
5.68991	-0.760694	5.68968	-0.775209
5.69074	-0.760198	5.69051	-0.775409
5.69157	-0.76038	5.69135	-0.774926
5.6924	-0.760739	5.69218	-0.774488
5.69324	-0.760255	5.69301	-0.773327
5.69407	-0.760599	5.69384	-0.772775
5.6949	-0.76198	5.69467	-0.772325
5.69573	-0.762649	5.69551	-0.772509
5.69656	-0.762117	5.69634	-0.772328
5.6974	-0.76162	5.69717	-0.772105
5.69823	-0.7619	5.698	-0.77183
5.69906	-0.762282	5.69883	-0.771132
5.69989	-0.762492	5.69967	-0.770588
5.70072	-0.762734	5.7005	-0.770092
5.70156	-0.763346	5.70133	-0.769485
5.70239	-0.76381	5.70216	-0.769577
5.70322	-0.76409	5.70299	-0.769856
5.70405	-0.763947	5.70383	-0.769197
5.70488	-0.763519	5.70466	-0.769656
5.70572	-0.763949	5.70549	-0.769365
5.70655	-0.764219	5.70632	-0.768532
5.70738	-0.763601	5.70715	-0.768095
5.70821	-0.762863	5.70799	-0.768622
5.70904	-0.762724	5.70882	-0.768102
5.70988	-0.762978	5.70965	-0.767656
5.71071	-0.763059	5.71048	-0.767288
5.71154	-0.763116	5.71131	-0.767428
5.71237	-0.763376	5.71215	-0.767829
5.7132	-0.763454	5.71298	-0.768456
5.71403	-0.763396	5.71381	-0.768079
5.71487	-0.76327	5.71464	-0.768268
5.7157	-0.762881	5.71547	-0.767681
5.71653	-0.762205	5.71631	-0.767496
5.71736	-0.761877	5.71714	-0.767745
5.71819	-0.761985	5.71797	-0.76764
5.71903	-0.762449	5.7188	-0.766478
5.71986	-0.763084	5.71963	-0.766088
5.72069	-0.763557	5.72047	-0.765516
5.72152	-0.763309	5.7213	-0.765246
5.72235	-0.762924	5.72213	-0.765912
5.72319	-0.762922	5.72296	-0.766241
5.72402	-0.762771	5.72379	-0.765808
5.72485	-0.762566	5.72463	-0.765607
5.72568	-0.762483	5.72546	-0.765226
5.72651	-0.762804	5.72629	-0.764978
5.72735	-0.763269	5.72712	-0.764896
5.72818	-0.763332	5.72795	-0.764017
5.72901	-0.763222	5.72879	-0.763961
5.72984	-0.763436	5.72962	-0.764137
5.73067	-0.76368	5.73045	-0.763845
5.73151	-0.764333	5.73128	-0.763516
5.73234	-0.764536	5.73211	-0.763526
5.73317	-0.763964	5.73295	-0.763694
5.734	-0.763725	5.73378	-0.763845
5.73483	-0.764275	5.73461	-0.763853
5.73567	-0.763793	5.73544	-0.764528
5.7365	-0.76275	5.73627	-0.764678
5.73733	-0.76281	5.73711	-0.765056
5.73816	-0.76377	5.73794	-0.765409
5.73899	-0.764092	5.73877	-0.765137
5.73983	-0.76388	5.7396	-0.765491
5.74066	-0.763745	5.74043	-0.765812
5.74149	-0.764333	5.74127	-0.766171
5.74232	-0.764564	5.7421	-0.766339
5.74315	-0.763795	5.74293	-0.766277
5.74399	-0.763245	5.74376	-0.766422
5.74482	-0.763376	5.74459	-0.765966
5.74565	-0.764295	5.74543	-0.765743
5.74648	-0.764438	5.74626	-0.765489
5.74731	-0.763468	5.74709	-0.76497
5.74815	-0.763223	5.74792	-0.765522
5.74898	-0.764371	5.74875	-0.766149
5.74981	-0.765812	5.74959	-0.766116
5.75064	-0.766176	5.75042	-0.766549
5.75147	-0.766469	5.75125	-0.767019
5.7523	-0.767166	5.75208	-0.767093
5.75314	-0.767802	5.75291	-0.767283
5.75397	-0.767551	5.75375	-0.767428
5.7548	-0.767769	5.75458	-0.767549
5.75563	-0.768316	5.75541	-0.767702
5.75647	-0.767945	5.75624	-0.767466
5.7573	-0.767432	5.75707	-0.767697
5.75813	-0.767623	5.75791	-0.768112
5.75896	-0.767818	5.75874	-0.767546
5.75979	-0.768227	5.75957	-0.766782
5.76063	-0.768374	5.7604	-0.766827
5.76146	-0.768325	5.76123	-0.76713
5.76229	-0.767712	5.76207	-0.767661
5.76312	-0.767951	5.7629	-0.76814
5.76395	-0.768028	5.76373	-0.767895
5.76478	-0.768164	5.76456	-0.767659
5.76562	-0.768178	5.76539	-0.766845
5.76645	-0.767697	5.76623	-0.766243
5.76728	-0.767809	5.76706	-0.765665
5.76811	-0.767517	5.76789	-0.765077
5.76894	-0.767452	5.76872	-0.764891
5.76978	-0.767362	5.76955	-0.765007
5.77061	-0.76735	5.77039	-0.764734
5.77144	-0.767025	5.77122	-0.76457
5.77227	-0.766587	5.77205	-0.764061
5.7731	-0.765912	5.77288	-0.764202
5.77394	-0.767335	5.77371	-0.764318
5.77477	-0.768492	5.77455	-0.764081
5.7756	-0.768741	5.77538	-0.763361
5.77643	-0.768233	5.77621	-0.763371
5.77726	-0.768443	5.77704	-0.763301
5.7781	-0.76902	5.77787	-0.763145
5.77893	-0.768472	5.77871	-0.762313
5.77976	-0.768208	5.77954	-0.76205
5.78059	-0.769128	5.78037	-0.762431
5.78142	-0.769202	5.7812	-0.762299
5.78226	-0.769414	5.78203	-0.761974
5.78309	-0.768064	5.78287	-0.762093
5.78392	-0.767643	5.7837	-0.762249
5.78475	-0.767671	5.78453	-0.763244
5.78558	-0.767671	5.78536	-0.763492
5.78642	-0.767112	5.78619	-0.763476
5.78725	-0.766888	5.78703	-0.763698
5.78808	-0.767092	5.78786	-0.763882
5.78891	-0.767312	5.78869	-0.764367
5.78974	-0.766715	5.78952	-0.764234
5.79057	-0.765501	5.79035	-0.763314
5.79141	-0.765168	5.79119	-0.762982
5.79224	-0.765314	5.79202	-0.762542
5.79307	-0.764841	5.79285	-0.76281
5.7939	-0.76457	5.79368	-0.763474
5.79474	-0.764619	5.79451	-0.763172
5.79557	-0.764931	5.79535	-0.762425
5.7964	-0.763751	5.79618	-0.762029
5.79723	-0.762945	5.79701	-0.762002
5.79806	-0.763268	5.79784	-0.761743
5.79889	-0.764394	5.79867	-0.761158
5.79973	-0.764766	5.79951	-0.76106
5.80056	-0.764295	5.80034	-0.760963
5.80139	-0.763615	5.80117	-0.761357
5.80222	-0.762794	5.802	-0.762303
5.80305	-0.763027	5.80283	-0.762318
5.80389	-0.76359	5.80367	-0.761873
5.80472	-0.763653	5.8045	-0.76163
5.80555	-0.764735	5.80533	-0.76111
5.80638	-0.765507	5.80616	-0.76117
5.80721	-0.765812	5.80699	-0.761954
5.80805	-0.767302	5.80783	-0.762395
5.80888	-0.767065	5.80866	-0.762868
5.80971	-0.768003	5.80949	-0.763384
5.81054	-0.767874	5.81032	-0.763401
5.81137	-0.76754	5.81115	-0.763946
5.81221	-0.768267	5.81199	-0.764189
5.81304	-0.767622	5.81282	-0.764199
5.81387	-0.76768	5.81365	-0.764879
5.8147	-0.767829	5.81448	-0.765131
5.81553	-0.766145	5.81531	-0.765037
5.81637	-0.76648	5.81615	-0.765342
5.8172	-0.766523	5.81698	-0.765307
5.81803	-0.766114	5.81781	-0.765608
5.81886	-0.765682	5.81864	-0.765799
5.81969	-0.766269	5.81947	-0.766522
5.82053	-0.76641	5.82031	-0.76753
5.82136	-0.7651	5.82114	-0.767405
5.82219	-0.764117	5.82197	-0.7674
5.82302	-0.764388	5.8228	-0.767682
5.82385	-0.763535	5.82363	-0.768226
5.82469	-0.764721	5.82447	-0.768268
5.82552	-0.76531	5.8253	-0.767995
5.82635	-0.765811	5.82613	-0.76747
5.82718	-0.765984	5.82696	-0.767915
5.82801	-0.764964	5.82779	-0.768045
5.82885	-0.76517	5.82863	-0.76787
5.82968	-0.765198	5.82946	-0.767276
5.83051	-0.765463	5.83029	-0.766381
5.83134	-0.765228	5.83112	-0.765971
5.83217	-0.765431	5.83195	-0.766575
5.833	-0.765153	5.83279	-0.766444
5.83384	-0.764734	5.83362	-0.766272
5.83467	-0.764353	5.83445	-0.76574
5.8355	-0.763383	5.83528	-0.764889
5.83633	-0.762917	5.83611	-0.765096
5.83716	-0.762736	5.83695	-0.765479
5.838	-0.763384	5.83778	-0.765895
5.83883	-0.764636	5.83861	-0.766547
5.83966	-0.764706	5.83944	-0.766759
5.84049	-0.764038	5.84027	-0.766504
5.84133	-0.763654	5.84111	-0.766395
5.84216	-0.764055	5.84194	-0.766959
5.84299	-0.764468	5.84277	-0.767231
5.84382	-0.764052	5.8436	-0.766975
5.84465	-0.763588	5.84443	-0.766776
5.84548	-0.763646	5.84527	-0.766962
5.84632	-0.763078	5.8461	-0.766855
5.84715	-0.761923	5.84693	-0.7675
5.84798	-0.761241	5.84776	-0.767557
5.84881	-0.7613	5.84859	-0.767354
5.84964	-0.760916	5.84943	-0.766323
5.85048	-0.760261	5.85026	-0.765893
5.85131	-0.759638	5.85109	-0.766166
5.85214	-0.759902	5.85192	-0.766515
5.85297	-0.760488	5.85275	-0.766165
5.8538	-0.761078	5.85359	-0.765855
5.85464	-0.761278	5.85442	-0.766263
5.85547	-0.761254	5.85525	-0.766331
5.8563	-0.760784	5.85608	-0.766297
5.85713	-0.760181	5.85691	-0.766358
5.85796	-0.759567	5.85775	-0.7661
5.8588	-0.759987	5.85858	-0.766286
5.85963	-0.760405	5.85941	-0.765974
5.86046	-0.759787	5.86024	-0.766124
5.86129	-0.758412	5.86107	-0.765397
5.86212	-0.758054	5.86191	-0.765225
5.86296	-0.758837	5.86274	-0.765647
5.86379	-0.759095	5.86357	-0.766464
5.86462	-0.758767	5.8644	-0.766291
5.86545	-0.759231	5.86523	-0.766735
5.86628	-0.759395	5.86607	-0.765953
5.86712	-0.759296	5.8669	-0.766073
5.86795	-0.759336	5.86773	-0.766177
5.86878	-0.759443	5.86856	-0.765931
5.86961	-0.759316	5.86939	-0.765934
5.87044	-0.758449	5.87023	-0.766544
5.87127	-0.757743	5.87106	-0.767484
5.87211	-0.757292	5.87189	-0.768043
5.87294	-0.757768	5.87272	-0.768921
5.87377	-0.758023	5.87355	-0.769678
5.8746	-0.758246	5.87439	-0.769632
5.87544	-0.758841	5.87522	-0.770076
5.87627	-0.759623	5.87605	-0.769638
5.8771	-0.760864	5.87688	-0.769533
5.87793	-0.761756	5.87771	-0.769579
5.87876	-0.762286	5.87855	-0.769587
5.8796	-0.762377	5.87938	-0.768933
5.88043	-0.762484	5.88021	-0.768549
5.88126	-0.762275	5.88104	-0.769028
5.88209	-0.761675	5.88187	-0.76955
5.88292	-0.761609	5.88271	-0.769468
5.88375	-0.761582	5.88354	-0.769766
5.88459	-0.762446	5.88437	-0.770125
5.88542	-0.763263	5.8852	-0.769964
5.88625	-0.763215	5.88603	-0.769957
5.88708	-0.762933	5.88687	-0.770307
5.88791	-0.762473	5.8877	-0.769823
5.88875	-0.762821	5.88853	-0.768951
5.88958	-0.763147	5.88936	-0.769215
5.89041	-0.76294	5.89019	-0.769342
5.89124	-0.763014	5.89103	-0.769911
5.89207	-0.762587	5.89186	-0.770711
5.89291	-0.762528	5.89269	-0.770096
5.89374	-0.762682	5.89352	-0.768828
5.89457	-0.761883	5.89435	-0.768925
5.8954	-0.761809	5.89519	-0.769324
5.89623	-0.761807	5.89602	-0.769159
5.89707	-0.762047	5.89685	-0.768733
5.8979	-0.763343	5.89768	-0.768342
5.89873	-0.763942	5.89851	-0.767997
5.89956	-0.764155	5.89935	-0.768261
5.90039	-0.764428	5.90018	-0.768742
5.90123	-0.76463	5.90101	-0.768626
5.90206	-0.76506	5.90184	-0.768087
5.90289	-0.765937	5.90267	-0.767558
5.90372	-0.765493	5.90351	-0.767462
5.90455	-0.764561	5.90434	-0.767067
5.90538	-0.764622	5.90517	-0.766406
5.90622	-0.764443	5.906	-0.76617
5.90705	-0.763458	5.90683	-0.765772
5.90788	-0.763125	5.90767	-0.766325
5.90871	-0.763793	5.9085	-0.766107
5.90954	-0.764102	5.90933	-0.765317
5.91038	-0.764011	5.91016	-0.764334
5.91121	-0.76469	5.91099	-0.763853
5.91204	-0.765517	5.91183	-0.763539
5.91287	-0.765367	5.91266	-0.763164
5.91371	-0.76564	5.91349	-0.762949
5.91454	-0.765653	5.91432	-0.762076
5.91537	-0.764237	5.91515	-0.762179
5.9162	-0.764894	5.91599	-0.762025
5.91703	-0.765141	5.91682	-0.762203
5.91786	-0.765073	5.91765	-0.762765
5.9187	-0.764642	5.91848	-0.762946
5.91953	-0.76395	5.91931	-0.762598
5.92036	-0.762953	5.92015	-0.76239
5.92119	-0.762483	5.92098	-0.762394
5.92202	-0.761805	5.92181	-0.762338
5.92286	-0.7621	5.92264	-0.76275
5.92369	-0.763369	5.92347	-0.763155
5.92452	-0.764277	5.92431	-0.763505
5.92535	-0.764561	5.92514	-0.763032
5.92618	-0.764523	5.92597	-0.762316
5.92702	-0.763825	5.9268	-0.763128
5.92785	-0.763572	5.92763	-0.763289
5.92868	-0.763855	5.92847	-0.762904
5.92951	-0.763484	5.9293	-0.763201
5.93034	-0.763462	5.93013	-0.762878
5.93118	-0.763769	5.93096	-0.762505
5.93201	-0.762998	5.93179	-0.763072
5.93284	-0.762454	5.93263	-0.763142
5.93367	-0.762743	5.93346	-0.763204
5.9345	-0.762661	5.93429	-0.76421
5.93534	-0.762568	5.93512	-0.765205
5.93617	-0.762286	5.93595	-0.765452
5.937	-0.761924	5.93679	-0.765436
5.93783	-0.761706	5.93762	-0.765404
5.93866	-0.761358	5.93845	-0.765428
5.9395	-0.761736	5.93928	-0.765545
5.94033	-0.762285	5.94011	-0.765512
5.94116	-0.761118	5.94095	-0.765084
5.94199	-0.760809	5.94178	-0.765188
5.94282	-0.760418	5.94261	-0.7657
5.94365	-0.759715	5.94344	-0.766384
5.94449	-0.759817	5.94427	-0.767042
5.94532	-0.760005	5.94511	-0.767318
5.94615	-0.759908	5.94594	-0.767031
5.94698	-0.760491	5.94677	-0.767015
5.94782	-0.76106	5.9476	-0.767183
5.94865	-0.76102	5.94843	-0.766981
5.94948	-0.761409	5.94927	-0.766687
5.95031	-0.762148	5.9501	-0.766549
5.95114	-0.76132	5.95093	-0.767315
5.95198	-0.760866	5.95176	-0.768099
5.95281	-0.761278	5.95259	-0.768248
5.95364	-0.760361	5.95343	-0.76821
5.95447	-0.759609	5.95426	-0.768147
5.9553	-0.759934	5.95509	-0.76899
5.95613	-0.760228	5.95592	-0.768768
5.95697	-0.760369	5.95675	-0.768626
5.9578	-0.761771	5.95759	-0.769173
5.95863	-0.761349	5.95842	-0.769369
5.95946	-0.760461	5.95925	-0.769352
5.9603	-0.76074	5.96008	-0.768738
5.96113	-0.760894	5.96091	-0.768338
5.96196	-0.760777	5.96175	-0.76818
5.96279	-0.762136	5.96258	-0.768017
5.96362	-0.762439	5.96341	-0.767303
5.96446	-0.76203	5.96424	-0.766252
5.96529	-0.76154	5.96507	-0.765113
5.96612	-0.760782	5.96591	-0.764285
5.96695	-0.760506	5.96674	-0.765313
5.96778	-0.759677	5.96757	-0.765722
5.96861	-0.759705	5.9684	-0.765257
5.96945	-0.760058	5.96923	-0.766007
5.97028	-0.759476	5.97007	-0.766571
5.97111	-0.759971	5.9709	-0.767215
5.97194	-0.76052	5.97173	-0.768292
5.97277	-0.759567	5.97256	-0.768786
5.97361	-0.760411	5.97339	-0.768416
5.97444	-0.761383	5.97423	-0.768269
5.97527	-0.761254	5.97506	-0.768399
5.9761	-0.76154	5.97589	-0.767831
5.97693	-0.762398	5.97672	-0.767013
5.97777	-0.761474	5.97755	-0.766803
5.9786	-0.761658	5.97839	-0.766772
5.97943	-0.761718	5.97922	-0.766548
5.98026	-0.762272	5.98005	-0.766881
5.98109	-0.762195	5.98088	-0.766557
5.98193	-0.761723	5.98171	-0.766939
5.98276	-0.762081	5.98255	-0.767166
5.98359	-0.761534	5.98338	-0.767199
5.98442	-0.760795	5.98421	-0.766258
5.98525	-0.760315	5.98504	-0.765794
5.98609	-0.760242	5.98588	-0.765893
5.98692	-0.759373	5.98671	-0.765737
5.98775	-0.758802	5.98754	-0.764807
5.98858	-0.760095	5.98837	-0.76493
5.98941	-0.759938	5.9892	-0.764807
5.99024	-0.760148	5.99003	-0.765063
5.99108	-0.760892	5.99087	-0.765814
5.99191	-0.760755	5.9917	-0.766531
5.99274	-0.760572	5.99253	-0.767011
5.99357	-0.759924	5.99336	-0.767035
5.99441	-0.759867	5.9942	-0.767039
5.99524	-0.760935	5.99503	-0.76703
5.99607	-0.760611	5.99586	-0.766742
5.9969	-0.761472	5.99669	-0.76649
5.99773	-0.761691	5.99752	-0.766279
5.99857	-0.761196	5.99835	-0.766149
5.9994	-0.760706	5.99919	-0.765945
6.00023	-0.760534	6.00002	-0.765561
6.00106	-0.760729	6.00085	-0.765484
6.00189	-0.760247	6.00168	-0.765602
6.00272	-0.759462	6.00251	-0.765703
6.00356	-0.759039	6.00335	-0.766634
6.00439	-0.759429	6.00418	-0.766646
6.00522	-0.759763	6.00501	-0.766125
6.00605	-0.76112	6.00584	-0.765829
6.00688	-0.760943	6.00667	-0.765601
6.00772	-0.761613	6.00751	-0.766086
6.00855	-0.761601	6.00834	-0.765942
6.00938	-0.761511	6.00917	-0.765713
6.01021	-0.761127	6.01	-0.764564
6.01104	-0.761042	6.01084	-0.764533
6.01188	-0.760818	6.01167	-0.764919
6.01271	-0.760316	6.0125	-0.763668
6.01354	-0.760456	6.01333	-0.763499
6.01437	-0.760549	6.01416	-0.763111
6.0152	-0.761145	6.01499	-0.762181
6.01604	-0.76083	6.01583	-0.761492
6.01687	-0.760689	6.01666	-0.761414
6.0177	-0.76057	6.01749	-0.76125
6.01853	-0.760982	6.01832	-0.760752
6.01936	-0.761116	6.01915	-0.761672
6.0202	-0.761694	6.01999	-0.761355
6.02103	-0.761268	6.02082	-0.760802
6.02186	-0.760685	6.02165	-0.760145
6.02269	-0.760274	6.02248	-0.760312
6.02352	-0.760423	6.02331	-0.762057
6.02435	-0.760922	6.02415	-0.761166
6.02519	-0.761614	6.02498	-0.761118
6.02602	-0.761828	6.02581	-0.760559
6.02685	-0.762371	6.02664	-0.761085
6.02768	-0.762182	6.02747	-0.760909
6.02851	-0.762719	6.02831	-0.760613
6.02935	-0.763659	6.02914	-0.760685
6.03018	-0.762927	6.02997	-0.761301
6.03101	-0.762978	6.0308	-0.761257
6.03184	-0.762075	6.03163	-0.760607
6.03268	-0.761102	6.03247	-0.760833
6.03351	-0.761076	6.0333	-0.760674
6.03434	-0.761215	6.03413	-0.760187
6.03517	-0.761113	6.03496	-0.759545
6.036	-0.760632	6.0358	-0.75929
6.03683	-0.760283	6.03663	-0.759059
6.03767	-0.760757	6.03746	-0.759711
6.0385	-0.760174	6.03829	-0.759084
6.03933	-0.76061	6.03912	-0.758199
6.04016	-0.760935	6.03995	-0.757108
6.04099	-0.76143	6.04079	-0.757684
6.04183	-0.761973	6.04162	-0.757149
6.04266	-0.7622	6.04245	-0.756384
6.04349	-0.76299	6.04328	-0.755995
6.04432	-0.762981	6.04411	-0.756699
6.04516	-0.763534	6.04495	-0.755925
6.04599	-0.762895	6.04578	-0.755177
6.04682	-0.762358	6.04661	-0.755648
6.04765	-0.761234	6.04744	-0.756411
6.04848	-0.760682	6.04828	-0.756709
6.04931	-0.760733	6.04911	-0.755816
6.05015	-0.761888	6.04994	-0.756296
6.05098	-0.762986	6.05077	-0.75674
6.05181	-0.763514	6.0516	-0.757836
6.05264	-0.763772	6.05243	-0.756721
6.05347	-0.763626	6.05327	-0.756707
6.05431	-0.763749	6.0541	-0.756606
6.05514	-0.764863	6.05493	-0.755819
6.05597	-0.76532	6.05576	-0.755534
6.0568	-0.764065	6.05659	-0.755129
6.05763	-0.764053	6.05743	-0.755408
6.05846	-0.764246	6.05826	-0.755466
6.0593	-0.764265	6.05909	-0.75473
6.06013	-0.764402	6.05992	-0.755663
6.06096	-0.765095	6.06076	-0.755314
6.06179	-0.764887	6.06159	-0.754969
6.06262	-0.765503	6.06242	-0.755022
6.06346	-0.766295	6.06325	-0.755366
6.06429	-0.767225	6.06408	-0.755177
6.06512	-0.767352	6.06492	-0.75386
6.06595	-0.767112	6.06575	-0.754176
6.06679	-0.768049	6.06658	-0.753137
6.06762	-0.768187	6.06741	-0.753763
6.06845	-0.768332	6.06824	-0.753454
6.06928	-0.768801	6.06907	-0.753286
6.07011	-0.76917	6.06991	-0.752935
6.07095	-0.769204	6.07074	-0.752146
6.07178	-0.769055	6.07157	-0.751831
6.07261	-0.768684	6.0724	-0.751378
6.07344	-0.769601	6.07324	-0.752242
6.07427	-0.770806	6.07407	-0.750555
6.0751	-0.770687	6.0749	-0.749697
6.07594	-0.770858	6.07573	-0.749966
6.07677	-0.771714	6.07656	-0.750806
6.0776	-0.77214	6.07739	-0.751696
6.07843	-0.771866	6.07823	-0.751728
6.07927	-0.772561	6.07906	-0.750832
6.0801	-0.773082	6.07989	-0.751379
6.08093	-0.773329	6.08072	-0.752803
6.08176	-0.773794	6.08155	-0.752891
6.08259	-0.773831	6.08239	-0.752392
6.08343	-0.773047	6.08322	-0.752228
6.08426	-0.772427	6.08405	-0.751489
6.08509	-0.771806	6.08488	-0.751477
6.08592	-0.771683	6.08572	-0.750371
6.08675	-0.771181	6.08655	-0.750379
6.08758	-0.770827	6.08738	-0.751383
6.08842	-0.77098	6.08821	-0.750874
6.08925	-0.7712	6.08904	-0.750171
6.09008	-0.770708	6.08988	-0.749752
6.09091	-0.769738	6.09071	-0.749809
6.09174	-0.768786	6.09154	-0.749601
6.09258	-0.768805	6.09237	-0.749608
6.09341	-0.768469	6.0932	-0.748715
6.09424	-0.768112	6.09403	-0.748864
6.09507	-0.768306	6.09487	-0.748184
6.0959	-0.768377	6.0957	-0.748067
6.09674	-0.767984	6.09653	-0.748128
6.09757	-0.767536	6.09736	-0.74819
6.0984	-0.767459	6.09819	-0.748439
6.09923	-0.767079	6.09903	-0.748468
6.10006	-0.766584	6.09986	-0.748288
6.1009	-0.766512	6.10069	-0.747828
6.10173	-0.766275	6.10152	-0.747325
6.10256	-0.766203	6.10236	-0.747985
6.10339	-0.766182	6.10319	-0.74841
6.10422	-0.765963	6.10402	-0.748371
6.10506	-0.765656	6.10485	-0.748222
6.10589	-0.765128	6.10568	-0.747632
6.10672	-0.76496	6.10651	-0.747688
6.10755	-0.764666	6.10735	-0.747681
6.10838	-0.764129	6.10818	-0.747792
6.10921	-0.763835	6.10901	-0.747498
6.11005	-0.763414	6.10984	-0.747467
6.11088	-0.762933	6.11067	-0.747296
6.11171	-0.762173	6.11151	-0.747143
6.11254	-0.761578	6.11234	-0.747421
6.11337	-0.761846	6.11317	-0.748
6.11421	-0.761932	6.114	-0.748654
6.11504	-0.760891	6.11484	-0.748421
6.11587	-0.760239	6.11567	-0.748995
6.1167	-0.760285	6.1165	-0.749474
6.11754	-0.759854	6.11733	-0.74909
6.11837	-0.758911	6.11816	-0.748221
6.1192	-0.759095	6.11899	-0.747281
6.12003	-0.758843	6.11983	-0.746702
6.12086	-0.757956	6.12066	-0.746105
6.12169	-0.757746	6.12149	-0.745727
6.12253	-0.757012	6.12232	-0.745298
6.12336	-0.755395	6.12315	-0.745111
6.12419	-0.7553	6.12399	-0.74466
6.12502	-0.755672	6.12482	-0.745229
6.12585	-0.755873	6.12565	-0.746186
6.12669	-0.756277	6.12648	-0.746815
6.12752	-0.756548	6.12732	-0.747773
6.12835	-0.756098	6.12815	-0.748121
6.12918	-0.755599	6.12898	-0.748061
6.13001	-0.755579	6.12981	-0.748627
6.13085	-0.756274	6.13064	-0.748872
6.13168	-0.756916	6.13148	-0.74944
6.13251	-0.757961	6.13231	-0.750074
6.13334	-0.758357	6.13314	-0.750434
6.13417	-0.75861	6.13397	-0.750946
6.13501	-0.759046	6.1348	-0.75146
6.13584	-0.759349	6.13563	-0.751388
6.13667	-0.759	6.13647	-0.751084
6.1375	-0.759294	6.1373	-0.750687
6.13833	-0.759053	6.13813	-0.750231
6.13917	-0.758745	6.13896	-0.750248
6.14	-0.758947	6.1398	-0.750374
6.14083	-0.759883	6.14063	-0.75013
6.14166	-0.760558	6.14146	-0.750727
6.14249	-0.761081	6.14229	-0.751561
6.14332	-0.7608	6.14312	-0.75102
6.14416	-0.760035	6.14396	-0.749745
6.14499	-0.759758	6.14479	-0.748882
6.14582	-0.759425	6.14562	-0.74837
6.14665	-0.758519	6.14645	-0.748314
6.14748	-0.759268	6.14728	-0.748233
6.14832	-0.759798	6.14811	-0.747765
6.14915	-0.759747	6.14895	-0.74799
6.14998	-0.759949	6.14978	-0.74852
6.15081	-0.760501	6.15061	-0.748721
6.15165	-0.760281	6.15144	-0.749391
6.15248	-0.760634	6.15228	-0.749765
6.15331	-0.761407	6.15311	-0.749575
6.15414	-0.76181	6.15394	-0.749957
6.15497	-0.760701	6.15477	-0.750017
6.1558	-0.760391	6.1556	-0.750131
6.15664	-0.760409	6.15644	-0.750621
6.15747	-0.759904	6.15727	-0.750905
6.1583	-0.759723	6.1581	-0.750343
6.15913	-0.760179	6.15893	-0.749775
6.15996	-0.760714	6.15976	-0.749614
6.1608	-0.760325	6.16059	-0.749804
6.16163	-0.760603	6.16143	-0.750321
6.16246	-0.75997	6.16226	-0.750856
6.16329	-0.759184	6.16309	-0.750713
6.16412	-0.759965	6.16392	-0.750176
6.16496	-0.760487	6.16476	-0.750285
6.16579	-0.75932	6.16559	-0.749887
6.16662	-0.759393	6.16642	-0.74913
6.16745	-0.759015	6.16725	-0.74841
6.16828	-0.75899	6.16808	-0.747765
6.16912	-0.759357	6.16892	-0.74694
6.16995	-0.76055	6.16975	-0.746441
6.17078	-0.762253	6.17058	-0.746094
6.17161	-0.761673	6.17141	-0.746331
6.17244	-0.761665	6.17224	-0.746228
6.17328	-0.761929	6.17307	-0.745907
6.17411	-0.761057	6.17391	-0.745362
6.17494	-0.760086	6.17474	-0.744927
6.17577	-0.758912	6.17557	-0.744079
6.1766	-0.758994	6.1764	-0.743963
6.17744	-0.758165	6.17723	-0.744119
6.17827	-0.75893	6.17807	-0.744893
6.1791	-0.757531	6.1789	-0.745875
6.17993	-0.757988	6.17973	-0.74654
6.18076	-0.757784	6.18056	-0.747645
6.18159	-0.757528	6.1814	-0.747625
6.18243	-0.757265	6.18223	-0.747815
6.18326	-0.757192	6.18306	-0.747127
6.18409	-0.75717	6.18389	-0.746946
6.18492	-0.757455	6.18472	-0.747887
6.18576	-0.757799	6.18555	-0.74849
6.18659	-0.757995	6.18639	-0.748832
6.18742	-0.758556	6.18722	-0.749213
6.18825	-0.759307	6.18805	-0.749607
6.18908	-0.758899	6.18888	-0.749902
6.18992	-0.757693	6.18971	-0.750566
6.19075	-0.757678	6.19055	-0.750139
6.19158	-0.757552	6.19138	-0.74994
6.19241	-0.757147	6.19221	-0.749136
6.19324	-0.756884	6.19304	-0.747818
6.19407	-0.757268	6.19388	-0.747161
6.19491	-0.756652	6.19471	-0.747506
6.19574	-0.756067	6.19554	-0.747135
6.19657	-0.756606	6.19637	-0.746826
6.1974	-0.757451	6.1972	-0.745961
6.19824	-0.757988	6.19803	-0.745348
6.19907	-0.758994	6.19887	-0.745129
6.1999	-0.759682	6.1997	-0.745799
6.20073	-0.759543	6.20053	-0.746514
6.20156	-0.759359	6.20136	-0.746762
6.20239	-0.759414	6.20219	-0.746152
6.20323	-0.759303	6.20303	-0.745753
6.20406	-0.759121	6.20386	-0.746261
6.20489	-0.759821	6.20469	-0.747349
6.20572	-0.759451	6.20552	-0.747455
6.20655	-0.759407	6.20636	-0.74796
6.20739	-0.758986	6.20719	-0.749211
6.20822	-0.758665	6.20802	-0.749681
6.20905	-0.758043	6.20885	-0.748799
6.20988	-0.757628	6.20968	-0.748353
6.21071	-0.756767	6.21052	-0.7486
6.21155	-0.75641	6.21135	-0.748363
6.21238	-0.756751	6.21218	-0.747237
6.21321	-0.755823	6.21301	-0.745634
6.21404	-0.755597	6.21384	-0.746075
6.21487	-0.755209	6.21467	-0.745336
6.21571	-0.754611	6.21551	-0.745557
6.21654	-0.754464	6.21634	-0.745356
6.21737	-0.754281	6.21717	-0.745811
6.2182	-0.75503	6.218	-0.745848
6.21903	-0.755112	6.21884	-0.744909
6.21987	-0.755629	6.21967	-0.744017
6.2207	-0.755087	6.2205	-0.744295
6.22153	-0.755291	6.22133	-0.743998
6.22236	-0.755672	6.22216	-0.742412
6.22319	-0.755597	6.223	-0.742735
6.22403	-0.754853	6.22383	-0.742122
6.22486	-0.753762	6.22466	-0.741418
6.22569	-0.752937	6.22549	-0.740724
6.22652	-0.752565	6.22632	-0.739241
6.22735	-0.752563	6.22715	-0.740081
6.22818	-0.75232	6.22799	-0.739694
6.22902	-0.752158	6.22882	-0.73967
6.22985	-0.752552	6.22965	-0.739132
6.23068	-0.752375	6.23048	-0.739372
6.23151	-0.751558	6.23132	-0.739761
6.23234	-0.751818	6.23215	-0.739764
6.23318	-0.752527	6.23298	-0.739936
6.23401	-0.752814	6.23381	-0.739851
6.23484	-0.753447	6.23464	-0.739613
6.23567	-0.75428	6.23548	-0.740695
6.23651	-0.754846	6.23631	-0.740018
6.23734	-0.754736	6.23714	-0.740087
6.23817	-0.754642	6.23797	-0.739626
6.239	-0.754602	6.2388	-0.739519
6.23983	-0.754215	6.23963	-0.739759
6.24066	-0.753993	6.24047	-0.73889
6.2415	-0.753387	6.2413	-0.737873
6.24233	-0.752651	6.24213	-0.737236
6.24316	-0.752661	6.24296	-0.737025
6.24399	-0.752961	6.2438	-0.737667
6.24482	-0.753033	6.24463	-0.737623
6.24566	-0.753346	6.24546	-0.736419
6.24649	-0.753166	6.24629	-0.735904
6.24732	-0.752861	6.24712	-0.735582
6.24815	-0.753024	6.24796	-0.735124
6.24898	-0.753482	6.24879	-0.734446
6.24982	-0.754552	6.24962	-0.734261
6.25065	-0.7554	6.25045	-0.735117
6.25148	-0.755963	6.25128	-0.734603
6.25231	-0.756542	6.25211	-0.733715
6.25314	-0.756747	6.25295	-0.734262
6.25398	-0.756559	6.25378	-0.734632
6.25481	-0.755901	6.25461	-0.734718
6.25564	-0.755369	6.25544	-0.735025
6.25647	-0.755495	6.25627	-0.73572
6.2573	-0.755341	6.25711	-0.735771
6.25814	-0.75557	6.25794	-0.734436
6.25897	-0.755955	6.25877	-0.73469
6.2598	-0.755274	6.2596	-0.734388
6.26063	-0.754567	6.26044	-0.734851
6.26146	-0.75484	6.26127	-0.735748
6.26229	-0.755164	6.2621	-0.735095
6.26313	-0.755272	6.26293	-0.73523
6.26396	-0.754773	6.26376	-0.735007
6.26479	-0.755413	6.26459	-0.734472
6.26562	-0.756876	6.26543	-0.734201
6.26645	-0.757916	6.26626	-0.73467
6.26729	-0.758248	6.26709	-0.734954
6.26812	-0.758268	6.26792	-0.734929
6.26895	-0.757621	6.26875	-0.734751
6.26978	-0.757073	6.26959	-0.73428
6.27062	-0.757423	6.27042	-0.734024
6.27145	-0.75747	6.27125	-0.733941
6.27228	-0.757353	6.27208	-0.733721
6.27311	-0.757786	6.27292	-0.733371
6.27394	-0.757464	6.27375	-0.733003
6.27477	-0.756586	6.27458	-0.733634
6.27561	-0.756195	6.27541	-0.733361
6.27644	-0.755591	6.27624	-0.734016
6.27727	-0.755598	6.27707	-0.734572
6.2781	-0.755767	6.27791	-0.733256
6.27893	-0.75629	6.27874	-0.733665
6.27977	-0.756772	6.27957	-0.732627
6.2806	-0.757109	6.2804	-0.732325
6.28143	-0.757791	6.28123	-0.73294
6.28226	-0.758342	6.28207	-0.732795
6.28309	-0.758858	6.2829	-0.732716
6.28393	-0.759041	6.28373	-0.733625
6.28476	-0.758723	6.28456	-0.733655
6.28559	-0.758331	6.2854	-0.733577
6.28642	-0.758404	6.28623	-0.733051
6.28725	-0.758642	6.28706	-0.733021
6.28809	-0.758877	6.28789	-0.733275
6.28892	-0.759291	6.28872	-0.732286
6.28975	-0.7598	6.28956	-0.731861
6.29058	-0.759369	6.29039	-0.731571
6.29141	-0.758425	6.29122	-0.731907
6.29225	-0.758267	6.29205	-0.732401
6.29308	-0.758624	6.29288	-0.731724
6.29391	-0.758607	6.29371	-0.731535
6.29474	-0.758816	6.29455	-0.73275
6.29557	-0.759377	6.29538	-0.733468
6.29641	-0.760057	6.29621	-0.734052
6.29724	-0.760372	6.29704	-0.735117
6.29807	-0.760732	6.29788	-0.735185
6.2989	-0.761088	6.29871	-0.734905
6.29973	-0.76129	6.29954	-0.734538
6.30057	-0.761329	6.30037	-0.735159
6.3014	-0.761946	6.3012	-0.734898
6.30223	-0.762323	6.30204	-0.734132
6.30306	-0.762222	6.30287	-0.734161
6.30389	-0.762393	6.3037	-0.733415
6.30473	-0.762464	6.30453	-0.733114
6.30556	-0.762686	6.30536	-0.732542
6.30639	-0.762695	6.30619	-0.732207
6.30722	-0.762068	6.30703	-0.732134
6.30805	-0.762061	6.30786	-0.732394
6.30889	-0.762377	6.30869	-0.732322
6.30972	-0.762637	6.30952	-0.732628
6.31055	-0.763807	6.31036	-0.733383
6.31138	-0.764689	6.31119	-0.733907
6.31221	-0.764473	6.31202	-0.734331
6.31304	-0.763835	6.31285	-0.734933
6.31388	-0.76355	6.31368	-0.735347
6.31471	-0.76357	6.31452	-0.735293
6.31554	-0.763907	6.31535	-0.73532
6.31637	-0.764236	6.31618	-0.735169
6.3172	-0.764624	6.31701	-0.735594
6.31804	-0.764443	6.31784	-0.736195
6.31887	-0.764027	6.31867	-0.736422
6.3197	-0.763593	6.31951	-0.737249
6.32053	-0.763089	6.32034	-0.738551
6.32136	-0.762686	6.32117	-0.739101
6.3222	-0.762419	6.322	-0.739283
6.32303	-0.761846	6.32284	-0.739417
6.32386	-0.760867	6.32367	-0.739515
6.32469	-0.760819	6.3245	-0.739739
6.32552	-0.761132	6.32533	-0.739461
6.32636	-0.761806	6.32616	-0.739244
6.32719	-0.761695	6.327	-0.739476
6.32802	-0.76132	6.32783	-0.739484
6.32885	-0.761156	6.32866	-0.739048
6.32968	-0.761246	6.32949	-0.739171
6.33052	-0.760621	6.33032	-0.739979
6.33135	-0.760323	6.33115	-0.741036
6.33218	-0.760556	6.33199	-0.741899
6.33301	-0.761039	6.33282	-0.742292
6.33384	-0.760986	6.33365	-0.742811
6.33468	-0.760801	6.33448	-0.743324
6.33551	-0.760974	6.33531	-0.743164
6.33634	-0.76056	6.33615	-0.742837
6.33717	-0.759955	6.33698	-0.74296
6.338	-0.759732	6.33781	-0.742763
6.33884	-0.759524	6.33864	-0.742348
6.33967	-0.75913	6.33948	-0.742446
6.3405	-0.759368	6.34031	-0.742655
6.34133	-0.759033	6.34114	-0.743089
6.34216	-0.758877	6.34197	-0.743495
6.343	-0.759083	6.3428	-0.74443
6.34383	-0.759048	6.34363	-0.744996
6.34466	-0.758695	6.34447	-0.744599
6.34549	-0.758515	6.3453	-0.74564
6.34632	-0.75833	6.34613	-0.746554
6.34715	-0.757798	6.34696	-0.74702
6.34799	-0.756885	6.34779	-0.746463
6.34882	-0.757069	6.34863	-0.746326
6.34965	-0.756897	6.34946	-0.745811
6.35048	-0.757187	6.35029	-0.745995
6.35131	-0.756594	6.35112	-0.746263
6.35215	-0.755773	6.35196	-0.745878
6.35298	-0.755721	6.35279	-0.745663
6.35381	-0.755627	6.35362	-0.745668
6.35464	-0.755905	6.35445	-0.745454
6.35548	-0.756237	6.35528	-0.744885
6.35631	-0.756236	6.35611	-0.744696
6.35714	-0.755955	6.35695	-0.744606
6.35797	-0.756325	6.35778	-0.744483
6.3588	-0.756344	6.35861	-0.743682
6.35963	-0.756367	6.35944	-0.743311
6.36047	-0.755967	6.36027	-0.743005
6.3613	-0.755525	6.36111	-0.742479
6.36213	-0.754856	6.36194	-0.741497
6.36296	-0.755316	6.36277	-0.741306
6.36379	-0.755009	6.3636	-0.742336
6.36463	-0.75529	6.36444	-0.742242
6.36546	-0.755702	6.36527	-0.74175
6.36629	-0.755136	6.3661	-0.74175
6.36712	-0.754818	6.36693	-0.742602
6.36795	-0.753547	6.36776	-0.743765
6.36879	-0.753677	6.3686	-0.743686
6.36962	-0.753801	6.36943	-0.743945
6.37045	-0.753702	6.37026	-0.744653
6.37128	-0.753747	6.37109	-0.744876
6.37211	-0.754397	6.37192	-0.744694
6.37295	-0.753796	6.37275	-0.744861
6.37378	-0.754253	6.37359	-0.744794
6.37461	-0.753919	6.37442	-0.744415
6.37544	-0.752892	6.37525	-0.744506
6.37627	-0.752554	6.37608	-0.744635
6.37711	-0.75243	6.37692	-0.745604
6.37794	-0.752055	6.37775	-0.746597
6.37877	-0.75088	6.37858	-0.745949
6.3796	-0.750563	6.37941	-0.745461
6.38043	-0.750449	6.38024	-0.745583
6.38127	-0.750232	6.38108	-0.745936
6.3821	-0.750113	6.38191	-0.74616
6.38293	-0.750565	6.38274	-0.746175
6.38376	-0.75042	6.38357	-0.7456
6.38459	-0.749642	6.3844	-0.745508
6.38542	-0.749945	6.38523	-0.745445
6.38626	-0.749143	6.38607	-0.746311
6.38709	-0.748722	6.3869	-0.745524
6.38792	-0.749202	6.38773	-0.745169
6.38875	-0.749308	6.38856	-0.745038
6.38959	-0.749878	6.3894	-0.745765
6.39042	-0.749283	6.39023	-0.746041
6.39125	-0.749379	6.39106	-0.746848
6.39208	-0.748999	6.39189	-0.746983
6.39291	-0.749475	6.39272	-0.746866
6.39375	-0.749169	6.39356	-0.747249
6.39458	-0.748956	6.39439	-0.747294
6.39541	-0.749679	6.39522	-0.746953
6.39624	-0.748636	6.39605	-0.746512
6.39707	-0.748211	6.39688	-0.746579
6.3979	-0.746875	6.39771	-0.74712
6.39874	-0.747799	6.39855	-0.747693
6.39957	-0.746351	6.39938	-0.747068
6.4004	-0.746227	6.40021	-0.746698
6.40123	-0.745892	6.40104	-0.74641
6.40206	-0.74554	6.40188	-0.745491
6.4029	-0.746029	6.40271	-0.745011
6.40373	-0.74725	6.40354	-0.744488
6.40456	-0.747142	6.40437	-0.744096
6.40539	-0.746886	6.4052	-0.743297
6.40622	-0.746709	6.40604	-0.743173
6.40706	-0.746068	6.40687	-0.7434
6.40789	-0.746117	6.4077	-0.744661
6.40872	-0.746675	6.40853	-0.744724
6.40955	-0.747294	6.40936	-0.744037
6.41038	-0.746566	6.41019	-0.744348
6.41122	-0.74641	6.41103	-0.74471
6.41205	-0.746448	6.41186	-0.745104
6.41288	-0.745584	6.41269	-0.745681
6.41371	-0.744596	6.41352	-0.746792
6.41454	-0.744999	6.41435	-0.74575
6.41538	-0.743942	6.41519	-0.745547
6.41621	-0.744425	6.41602	-0.745602
6.41704	-0.746487	6.41685	-0.745282
6.41787	-0.746814	6.41768	-0.745574
6.4187	-0.747385	6.41852	-0.744759
6.41954	-0.748193	6.41935	-0.744241
6.42037	-0.748897	6.42018	-0.744726
6.4212	-0.749366	6.42101	-0.744713
6.42203	-0.749187	6.42184	-0.744069
6.42286	-0.748628	6.42267	-0.743636
6.4237	-0.748369	6.42351	-0.743916
6.42453	-0.74803	6.42434	-0.74368
6.42536	-0.747962	6.42517	-0.742677
6.42619	-0.747796	6.426	-0.742281
6.42702	-0.747486	6.42684	-0.742329
6.42786	-0.748392	6.42767	-0.742099
6.42869	-0.749298	6.4285	-0.742575
6.42952	-0.749463	6.42933	-0.742409
6.43035	-0.74954	6.43016	-0.742624
6.43118	-0.749454	6.431	-0.742607
6.43201	-0.749848	6.43183	-0.742474
6.43285	-0.749904	6.43266	-0.7427
6.43368	-0.750271	6.43349	-0.741517
6.43451	-0.749476	6.43432	-0.741126
6.43534	-0.749719	6.43515	-0.740909
6.43618	-0.749602	6.43599	-0.740947
6.43701	-0.749249	6.43682	-0.740956
6.43784	-0.750122	6.43765	-0.741696
6.43867	-0.749763	6.43848	-0.741654
6.4395	-0.74948	6.43931	-0.741074
6.44033	-0.749827	6.44015	-0.740248
6.44117	-0.750837	6.44098	-0.741002
6.442	-0.750806	6.44181	-0.741435
6.44283	-0.750437	6.44264	-0.741153
6.44366	-0.750051	6.44348	-0.742534
6.44449	-0.749264	6.44431	-0.743576
6.44533	-0.748442	6.44514	-0.743359
6.44616	-0.74869	6.44597	-0.743344
6.44699	-0.748999	6.4468	-0.742911
6.44782	-0.74946	6.44764	-0.74289
6.44865	-0.749078	6.44847	-0.742847
6.44949	-0.7482	6.4493	-0.74107
6.45032	-0.748218	6.45013	-0.741218
6.45115	-0.749089	6.45096	-0.741363
6.45198	-0.75035	6.4518	-0.741536
6.45281	-0.750807	6.45263	-0.74145
6.45365	-0.750448	6.45346	-0.740698
6.45448	-0.750824	6.45429	-0.739671
6.45531	-0.750988	6.45512	-0.738294
6.45614	-0.750839	6.45596	-0.739441
6.45697	-0.750949	6.45679	-0.738917
6.45781	-0.749959	6.45762	-0.73903
6.45864	-0.749221	6.45845	-0.738858
6.45947	-0.749293	6.45928	-0.739468
6.4603	-0.749605	6.46012	-0.740169
6.46113	-0.74993	6.46095	-0.739164
6.46197	-0.749495	6.46178	-0.739184
6.4628	-0.749121	6.46261	-0.738997
6.46363	-0.748816	6.46344	-0.739044
6.46446	-0.748892	6.46427	-0.738355
6.46529	-0.749027	6.46511	-0.737871
6.46612	-0.749013	6.46594	-0.738462
6.46696	-0.749379	6.46677	-0.739226
6.46779	-0.749754	6.4676	-0.739548
6.46862	-0.749295	6.46844	-0.739805
6.46945	-0.748702	6.46927	-0.740877
6.47028	-0.747923	6.4701	-0.74027
6.47112	-0.747528	6.47093	-0.739996
6.47195	-0.747811	6.47176	-0.740686
6.47278	-0.747782	6.4726	-0.742022
6.47361	-0.7476	6.47343	-0.742695
6.47445	-0.746533	6.47426	-0.742714
6.47528	-0.746083	6.47509	-0.743831
6.47611	-0.746731	6.47592	-0.745002
6.47694	-0.746656	6.47676	-0.745417
6.47777	-0.74611	6.47759	-0.745566
6.4786	-0.746033	6.47842	-0.746369
6.47944	-0.745738	6.47925	-0.746468
6.48027	-0.746616	6.48008	-0.747217
6.4811	-0.747054	6.48092	-0.74729
6.48193	-0.746667	6.48175	-0.747441
6.48276	-0.745733	6.48258	-0.747318
6.4836	-0.744795	6.48341	-0.747439
6.48443	-0.74573	6.48424	-0.747195
6.48526	-0.745967	6.48508	-0.747673
6.48609	-0.746035	6.48591	-0.747818
6.48692	-0.746489	6.48674	-0.7485
6.48776	-0.746757	6.48757	-0.749447
6.48859	-0.746977	6.4884	-0.750086
6.48942	-0.746177	6.48923	-0.750189
6.49025	-0.74595	6.49007	-0.750713
6.49108	-0.746747	6.4909	-0.750574
6.49192	-0.74686	6.49173	-0.750213
6.49275	-0.746185	6.49256	-0.749908
6.49358	-0.745737	6.49339	-0.749374
6.49441	-0.744798	6.49423	-0.749025
6.49524	-0.744212	6.49506	-0.748753
6.49608	-0.744436	6.49589	-0.748901
6.49691	-0.744193	6.49672	-0.748983
6.49774	-0.744333	6.49756	-0.748684
6.49857	-0.745017	6.49839	-0.748427
6.4994	-0.745332	6.49922	-0.748653
6.50024	-0.745816	6.50005	-0.749156
6.50107	-0.745562	6.50088	-0.749371
6.5019	-0.744686	6.50172	-0.749602
6.50273	-0.74411	6.50255	-0.7499
6.50356	-0.743882	6.50338	-0.750065
6.50439	-0.74351	6.50421	-0.750682
6.50523	-0.743944	6.50504	-0.750875
6.50606	-0.743957	6.50588	-0.751693
6.50689	-0.744983	6.50671	-0.751853
6.50772	-0.744198	6.50754	-0.751346
6.50856	-0.743867	6.50837	-0.751277
6.50939	-0.743845	6.5092	-0.751464
6.51022	-0.742831	6.51004	-0.751101
6.51105	-0.743015	6.51087	-0.751119
6.51188	-0.744737	6.5117	-0.751659
6.51272	-0.744319	6.51253	-0.751837
6.51355	-0.744819	6.51336	-0.75167
6.51438	-0.744803	6.51419	-0.751485
6.51521	-0.743756	6.51503	-0.751378
6.51604	-0.743651	6.51586	-0.751239
6.51687	-0.743423	6.51669	-0.750393
6.51771	-0.744287	6.51752	-0.749507
6.51854	-0.744563	6.51835	-0.749988
6.51937	-0.743878	6.51919	-0.750306
6.5202	-0.744379	6.52002	-0.749603
6.52103	-0.744189	6.52085	-0.748293
6.52187	-0.744611	6.52168	-0.748237
6.5227	-0.744193	6.52252	-0.749041
6.52353	-0.744499	6.52335	-0.749827
6.52436	-0.745169	6.52418	-0.749944
6.52519	-0.745145	6.52501	-0.751002
6.52603	-0.745611	6.52584	-0.751416
6.52686	-0.745236	6.52668	-0.75051
6.52769	-0.745761	6.52751	-0.749746
6.52852	-0.745363	6.52834	-0.749403
6.52935	-0.744899	6.52917	-0.749563
6.53019	-0.744962	6.53	-0.750043
6.53102	-0.745106	6.53084	-0.749268
6.53185	-0.744916	6.53167	-0.749218
6.53268	-0.744002	6.5325	-0.749379
6.53351	-0.743441	6.53333	-0.749418
6.53435	-0.74356	6.53416	-0.750225
6.53518	-0.743648	6.535	-0.750689
6.53601	-0.742737	6.53583	-0.75205
6.53684	-0.742756	6.53666	-0.752439
6.53767	-0.742259	6.53749	-0.752515
6.53851	-0.743074	6.53832	-0.752075
6.53934	-0.743421	6.53916	-0.752527
6.54017	-0.742062	6.53999	-0.752249
6.541	-0.742053	6.54082	-0.752407
6.54183	-0.741026	6.54165	-0.752422
6.54267	-0.741573	6.54248	-0.752126
6.5435	-0.742149	6.54331	-0.751925
6.54433	-0.741167	6.54415	-0.751768
6.54516	-0.740711	6.54498	-0.751649
6.54599	-0.741281	6.54581	-0.751454
6.54683	-0.741938	6.54664	-0.751393
6.54766	-0.74264	6.54748	-0.751655
6.54849	-0.742695	6.54831	-0.750754
6.54932	-0.742819	6.54914	-0.751697
6.55015	-0.743573	6.54997	-0.752315
6.55098	-0.744057	6.5508	-0.752129
6.55182	-0.745113	6.55164	-0.752003
6.55265	-0.74458	6.55247	-0.75211
6.55348	-0.743649	6.5533	-0.751613
6.55431	-0.743359	6.55413	-0.750968
6.55515	-0.743492	6.55496	-0.750045
6.55598	-0.74267	6.5558	-0.750078
6.55681	-0.742888	6.55663	-0.749757
6.55764	-0.742371	6.55746	-0.750382
6.55847	-0.742388	6.55829	-0.750502
6.5593	-0.740714	6.55912	-0.750993
6.56014	-0.740374	6.55996	-0.751543
6.56097	-0.740033	6.56079	-0.751641
6.5618	-0.74003	6.56162	-0.750959
6.56263	-0.740401	6.56245	-0.751046
6.56346	-0.739597	6.56328	-0.752464
6.5643	-0.739656	6.56412	-0.753319
6.56513	-0.739461	6.56495	-0.752565
6.56596	-0.738549	6.56578	-0.751607
6.56679	-0.739538	6.56661	-0.751751
6.56762	-0.73891	6.56744	-0.751612
6.56846	-0.739349	6.56827	-0.750777
6.56929	-0.739191	6.56911	-0.751308
6.57012	-0.739444	6.56994	-0.752072
6.57095	-0.739826	6.57077	-0.752447
6.57178	-0.738939	6.5716	-0.752283
6.57262	-0.738328	6.57244	-0.751568
6.57345	-0.738698	6.57327	-0.751823
6.57428	-0.739538	6.5741	-0.752482
6.57511	-0.740293	6.57493	-0.752701
6.57594	-0.739923	6.57576	-0.753216
6.57678	-0.739845	6.5766	-0.753068
6.57761	-0.7403	6.57743	-0.752472
6.57844	-0.740453	6.57826	-0.751366
6.57927	-0.741197	6.57909	-0.750257
6.5801	-0.739797	6.57992	-0.75034
6.58094	-0.738972	6.58076	-0.751317
6.58177	-0.739618	6.58159	-0.751953
6.5826	-0.738342	6.58242	-0.752605
6.58343	-0.738857	6.58325	-0.75284
6.58426	-0.738097	6.58408	-0.751844
6.58509	-0.737135	6.58492	-0.750706
6.58593	-0.738539	6.58575	-0.750401
6.58676	-0.737734	6.58658	-0.750247
6.58759	-0.737704	6.58741	-0.75072
6.58842	-0.736682	6.58824	-0.749905
6.58925	-0.735448	6.58908	-0.750717
6.59009	-0.735544	6.58991	-0.750256
6.59092	-0.735272	6.59074	-0.750107
6.59175	-0.734954	6.59157	-0.74833
6.59258	-0.735245	6.5924	-0.747892
6.59342	-0.735519	6.59323	-0.748013
6.59425	-0.734483	6.59407	-0.748022
6.59508	-0.733988	6.5949	-0.747344
6.59591	-0.733693	6.59573	-0.747914
6.59674	-0.732792	6.59656	-0.748652
6.59757	-0.733209	6.5974	-0.749308
6.59841	-0.733022	6.59823	-0.748861
6.59924	-0.733832	6.59906	-0.749306
6.60007	-0.733741	6.59989	-0.748676
6.6009	-0.734599	6.60072	-0.748766
6.60173	-0.734445	6.60156	-0.748416
6.60257	-0.7342	6.60239	-0.748046
6.6034	-0.734287	6.60322	-0.747613
6.60423	-0.734724	6.60405	-0.748574
6.60506	-0.735776	6.60488	-0.747932
6.60589	-0.735341	6.60572	-0.746764
6.60673	-0.735467	6.60655	-0.746799
6.60756	-0.735333	6.60738	-0.747218
6.60839	-0.734233	6.60821	-0.747253
6.60922	-0.734365	6.60904	-0.746008
6.61005	-0.733863	6.60988	-0.746096
6.61089	-0.733602	6.61071	-0.745312
6.61172	-0.732251	6.61154	-0.745138
6.61255	-0.73182	6.61237	-0.745466
6.61338	-0.732335	6.6132	-0.744652
6.61421	-0.732667	6.61404	-0.745046
6.61505	-0.732386	6.61487	-0.744554
6.61588	-0.732255	6.6157	-0.744924
6.61671	-0.731543	6.61653	-0.744672
6.61754	-0.7316	6.61736	-0.744451
6.61837	-0.732126	6.6182	-0.745186
6.61921	-0.731878	6.61903	-0.745404
6.62004	-0.731634	6.61986	-0.746283
6.62087	-0.731229	6.62069	-0.746906
6.6217	-0.73173	6.62152	-0.746553
6.62253	-0.732127	6.62236	-0.745722
6.62336	-0.732356	6.62319	-0.74488
6.6242	-0.733301	6.62402	-0.743986
6.62503	-0.733102	6.62485	-0.743913
6.62586	-0.732811	6.62568	-0.743478
6.62669	-0.73282	6.62652	-0.743285
6.62753	-0.732299	6.62735	-0.742707
6.62836	-0.732584	6.62818	-0.742501
6.62919	-0.732286	6.62901	-0.742402
6.63002	-0.732006	6.62984	-0.742321
6.63085	-0.732086	6.63068	-0.742685
6.63169	-0.731067	6.63151	-0.742571
6.63252	-0.730832	6.63234	-0.743156
6.63335	-0.730474	6.63317	-0.744668
6.63418	-0.729054	6.634	-0.745188
6.63501	-0.728484	6.63484	-0.744612
6.63584	-0.729152	6.63567	-0.743912
6.63668	-0.729261	6.6365	-0.745236
6.63751	-0.729854	6.63733	-0.745569
6.63834	-0.730251	6.63816	-0.745145
6.63917	-0.730429	6.639	-0.745243
6.64	-0.730168	6.63983	-0.745174
6.64084	-0.729569	6.64066	-0.744623
6.64167	-0.728833	6.64149	-0.745037
6.6425	-0.729371	6.64232	-0.745146
6.64333	-0.729071	6.64316	-0.744319
6.64416	-0.728186	6.64399	-0.744065
6.645	-0.727062	6.64482	-0.743318
6.64583	-0.725538	6.64565	-0.743315
6.64666	-0.724915	6.64648	-0.743503
6.64749	-0.724245	6.64732	-0.743677
6.64832	-0.724192	6.64815	-0.74372
6.64916	-0.723535	6.64898	-0.744006
6.64999	-0.722518	6.64981	-0.743288
6.65082	-0.722733	6.65064	-0.743843
6.65165	-0.723002	6.65148	-0.744209
6.65248	-0.722851	6.65231	-0.745184
6.65332	-0.723614	6.65314	-0.744883
6.65415	-0.723714	6.65397	-0.744962
6.65498	-0.723373	6.6548	-0.745158
6.65581	-0.723343	6.65564	-0.744948
6.65664	-0.723315	6.65647	-0.744539
6.65747	-0.723086	6.6573	-0.743012
6.65831	-0.723678	6.65813	-0.742993
6.65914	-0.723594	6.65896	-0.742651
6.65997	-0.722837	6.6598	-0.741656
6.6608	-0.722319	6.66063	-0.741368
[truncated: 20,340 more rows]
