# Supplementary figures and images for: The neuronal calcium sensor NCS-1 regulates the phosphorylation state and activity of the Gα chaperone and GEF Ric-8A
Source: eLife journal article supplement (doi:10.7554/elife.86151), 2023-11-27

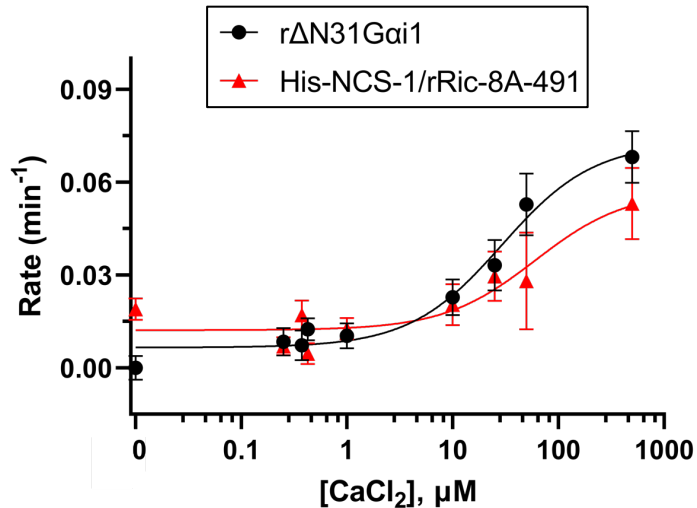

Supplement: supp [file elife-86151-supp-v1.zip]

A

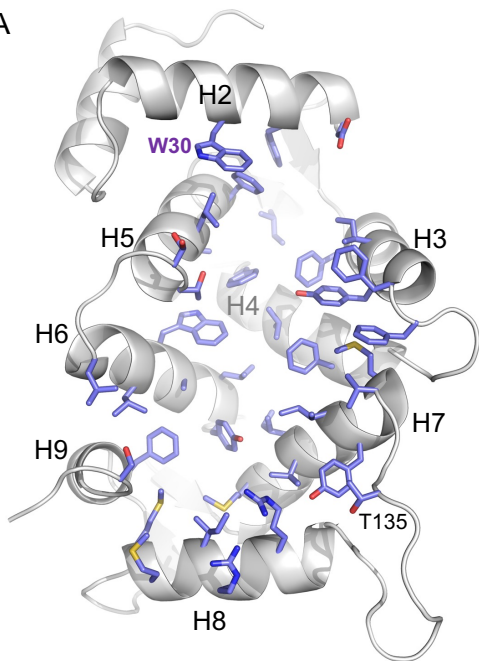

B

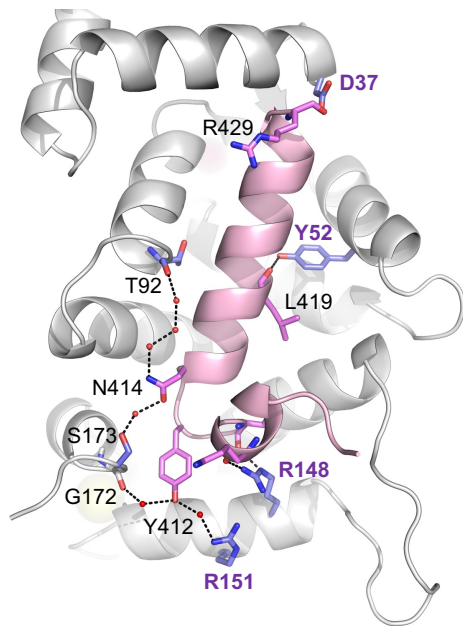

C

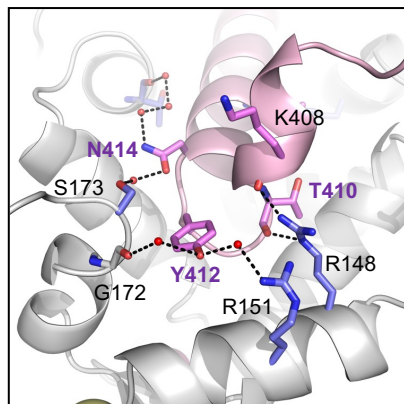

D

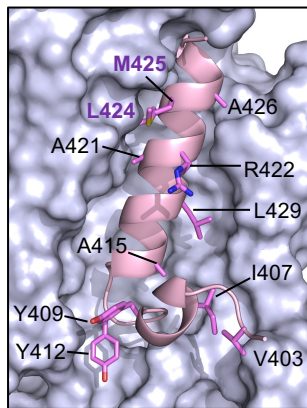

Supplement: supp [file elife-86151-supp-v1.zip]

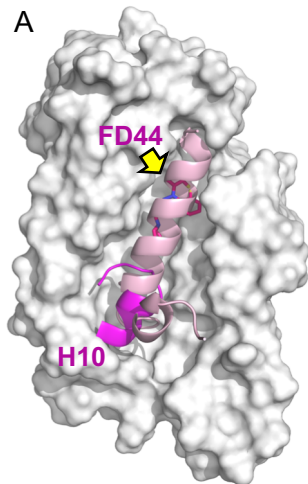

dNCS-1/**FD-44** vs  
hNCS-1/**Ric-8A-P**

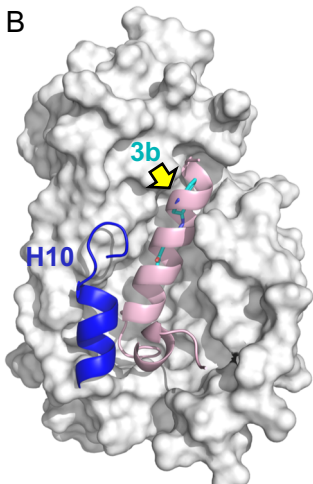

hNCS-1/**3b** vs  
hNCS-1/**Ric-8A-P**

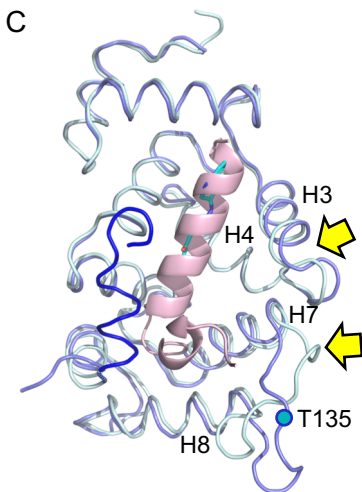

hNCS-1/**3b** vs  
hNCS-1/**Ric-8A-P**

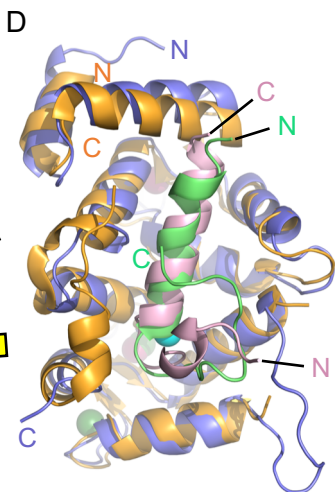

**KChIP1/Kv4.3** vs  
hNCS-1/**Ric-8A-P**

Supplement: supp [file elife-86151-supp-v1.zip]

A

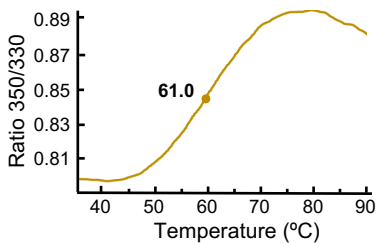

B

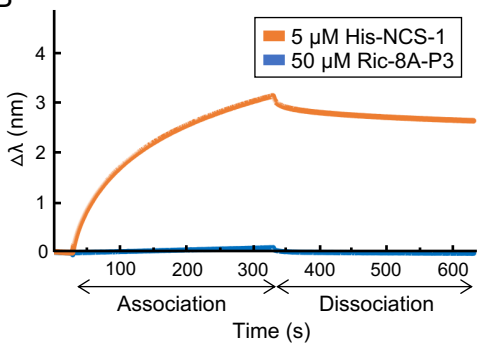

C

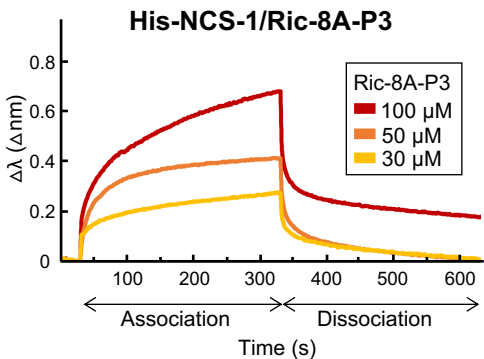

Supplement: supp [file elife-86151-supp-v1.zip]

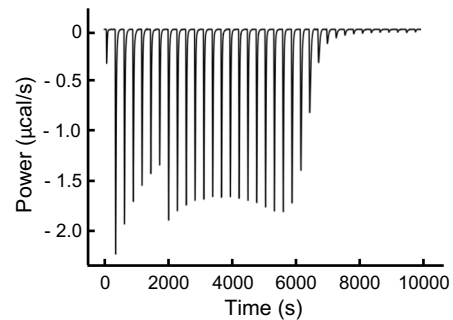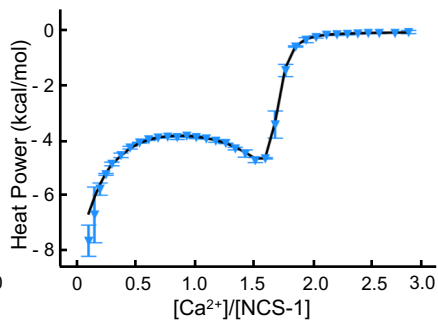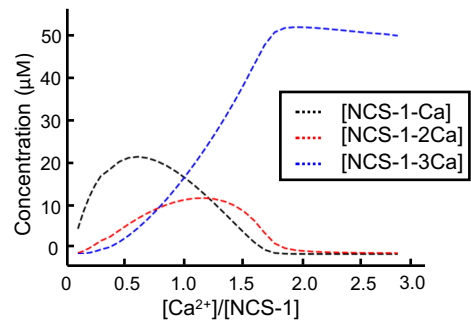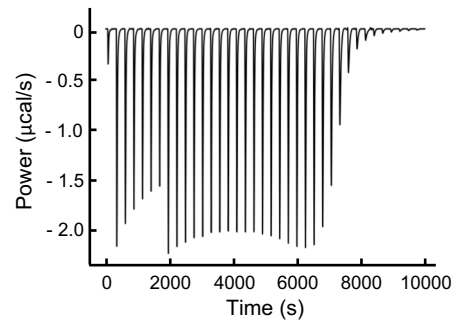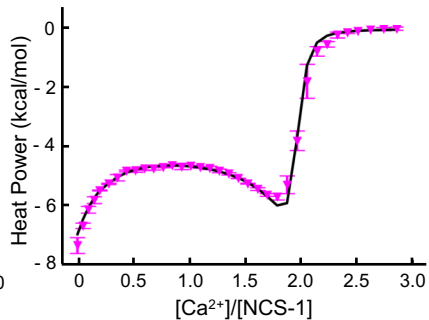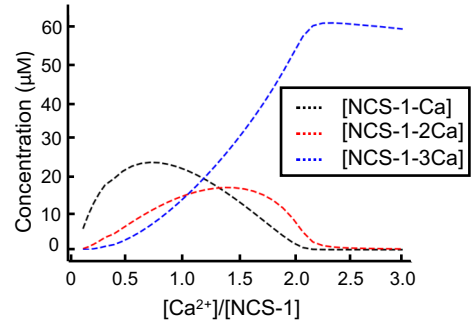

Supplement: supp [file elife-86151-supp-v1.zip]

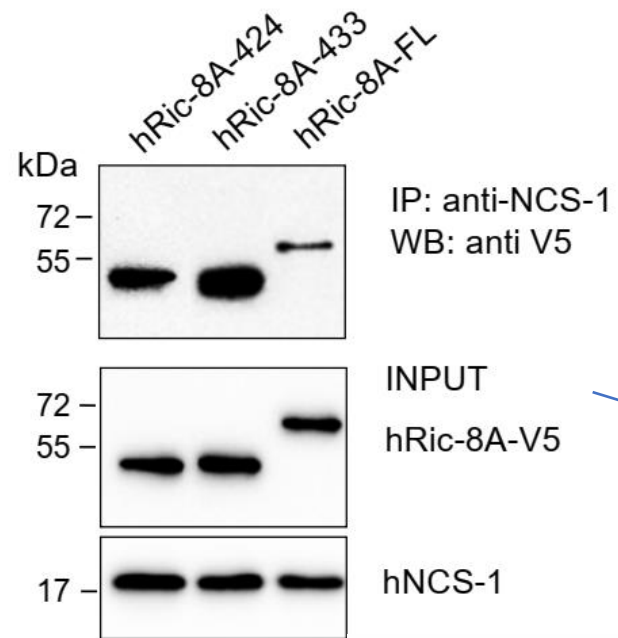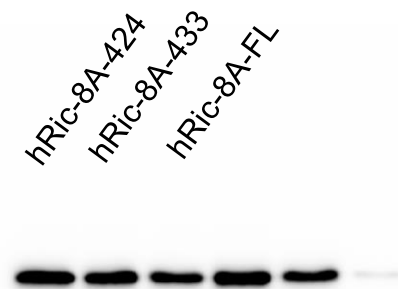

Figure 2C INPUT NCS1.tif

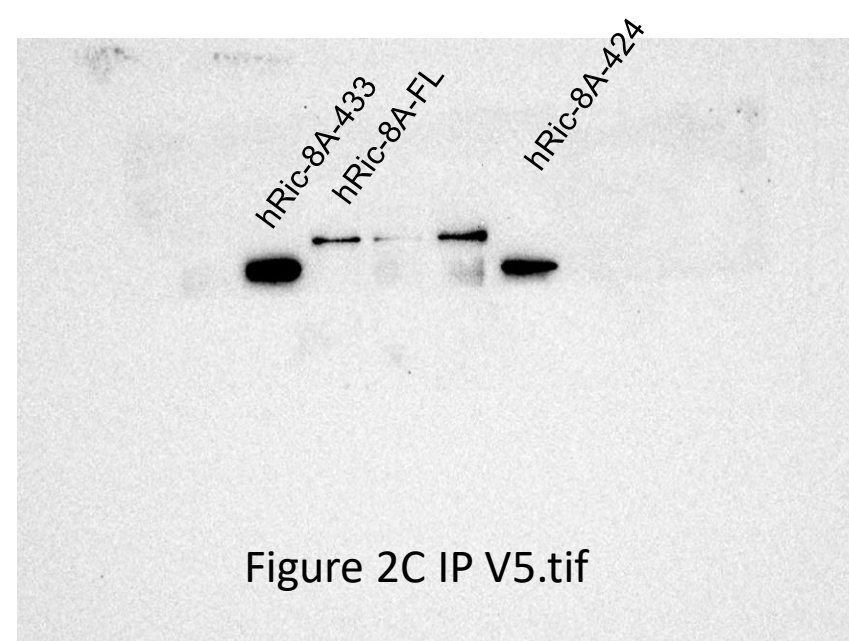

Figure 2C IP V5.tif

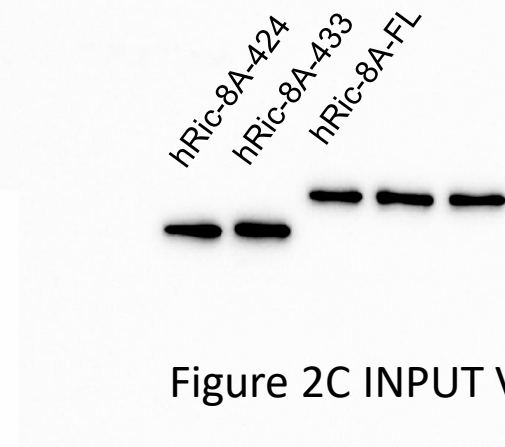

Figure 2C INPUT V5.tif

Supplement: supp [file elife-86151-supp-v1.zip]

A

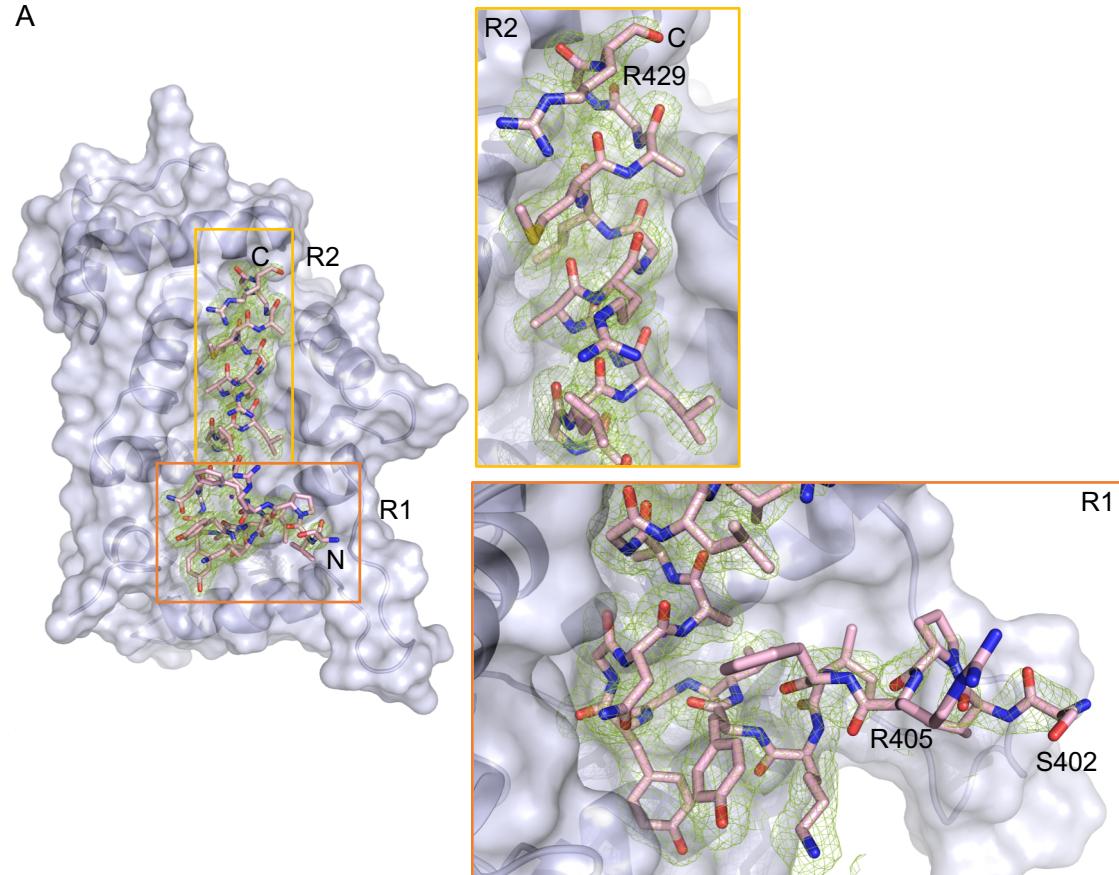

B

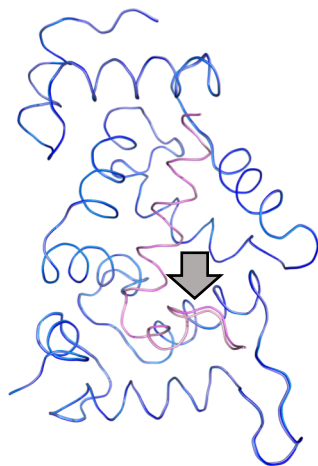

C

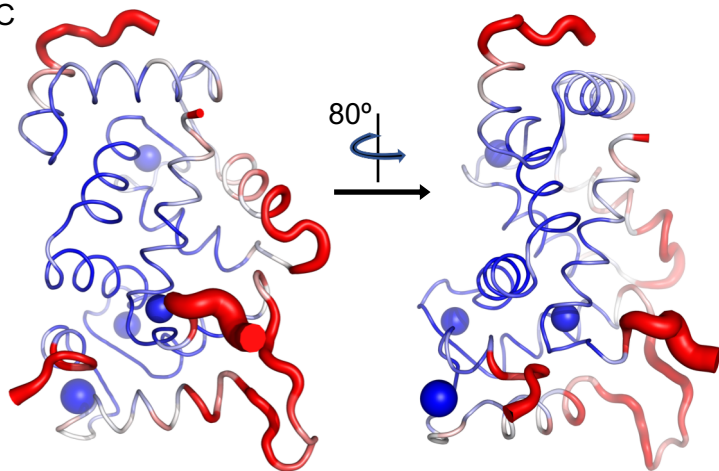

Supplement: supp [file elife-86151-supp-v1.zip]
